# Supplementary material for: Temperature-dependent regulation of upstream open reading frame translation in S. cerevisiae
Source: BMC Biol. 2019 Dec 6;17:101. doi: 10.1186/s12915-019-0718-5 (PMC6898956; doi:10.1186/s12915-019-0718-5)
Supplement: Supplementary file 3 — Additional file 3. uORF and mORF TE information: The file includes following datasheets: Sheet 1. Includes information regarding all the uORFs identified and studied here. Sheet 2. DESeq2 output for calculation of ΔTEuORF when cultured at 20 °C with respect to 30 °C. Sheet 3. DESeq2 output for calculation of ΔTEuORF when cultured at 37 °C with respect to 30 °C. Sheet 4. DESeq2 output for calculation of ΔTEmORF when cultured at 20 °C with respect to 30 °C. Sheet 5. DESeq2 output for calculation of ΔTEmORF when cultured at 37 °C with respect to 30 °C. [file 12915_2019_718_MOESM3_ESM.xlsx]

## Sheet: Sheet 1
	uORF name	Position from cap (in nt)	Position from mAUG (in nt)	Length with Stop (in nt)	Length w/o stop (in nt)	Contest	Start site	mORF name
	YAL005C_17	17	-45	33	30	GTAATCA	ATC	YAL005C
	YAL005C_24	24	-38	30	27	AGTATTA	ATT	YAL005C
	YAL005C_40	40	-22	21	18	AAAATTC	ATT	YAL005C
	YAL014C_34	34	-19	19	42	TAGATGC	ATG	YAL014C
	YAL016W_47	47	-50	50	186	CAACTGG	CTG	YAL016W
	YAL017W_44	44	-323	90	87	AAAGTGC	GTG	YAL017W
	YAL026C_55	55	-31	24	21	TTACTGG	CTG	YAL026C
	YAL034C_112	112	-523	45	42	TTACTGG	CTG	YAL034C
	YAL034C_85	85	-550	72	69	TGAATGG	ATG	YAL034C
	YAL040C_198	198	-123	45	42	CCATTGC	TTG	YAL040C
	YAL040C_239	239	-82	82	108	TTTCTGA	CTG	YAL040C
	YAL040C_246	246	-75	60	57	CCCATAG	ATA	YAL040C
	YAL049C_29	29	-37	37	45	ACTACGT	ACG	YAL049C
	YAL053W_72	72	-68	45	42	TCAGTGT	GTG	YAL053W
	YAL053W_94	94	-46	46	120	TTTCTGT	CTG	YAL053W
	YAR014C_21	21	-129	45	42	GCTTTGC	TTG	YAR014C
	YAR015W_70	70	-19	19	36	CACATAC	ATA	YAR015W
	YAR023C_932	932	-182	60	57	AACATGC	ATG	YAR023C
	YAR023C_971	971	-143	21	18	ACGATCC	ATC	YAR023C
	YBL022C_72	72	-55	55	84	TAGTTGT	TTG	YBL022C
	YBL022C_96	96	-31	31	60	GAGGTGC	GTG	YBL022C
	YBL030C_1	1	-120	99	96	N/A	TTG	YBL030C
	YBL030C_10	10	-111	90	87	TACATCT	ATC	YBL030C
	YBL030C_37	37	-84	63	60	TATATTA	ATT	YBL030C
	YBL032W_30	30	-62	36	33	CCCCTGT	CTG	YBL032W
	YBL045C_106	106	-80	48	45	CAATTGT	TTG	YBL045C
	YBL045C_56	56	-130	18	15	CGTATAG	ATA	YBL045C
	YBL045C_81	81	-105	36	33	AAATTGC	TTG	YBL045C
	YBL045C_90	90	-96	27	24	CCATTGC	TTG	YBL045C
	YBL047C_115	115	-46	27	24	TTCCTGT	CTG	YBL047C
	YBL047C_68	68	-93	33	30	GCGTTGA	TTG	YBL047C
	YBL047C_85	85	-76	57	54	TAGATTC	ATT	YBL047C
	YBL052C_141	141	-87	66	63	GCATTGC	TTG	YBL052C
	YBL056W_2	2	-44	44	105	N/A	ACG	YBL056W
	YBL057C_3	3	-17	17	15	AACATGA	ATG	YBL057C
	YBL099W_54	54	-266	36	33	CAATTGG	TTG	YBL099W
	YBL099W_67	67	-253	129	126	TAGATTG	ATT	YBL099W
	YBL099W_76	76	-244	120	117	TCCATCT	ATC	YBL099W
	YBL103C_132	132	-122	111	108	TACGTGA	GTG	YBL103C
	YBL103C_156	156	-98	87	84	AAAACGA	ACG	YBL103C
	YBR006W_53	53	-73	27	24	GTTCTGT	CTG	YBR006W
	YBR014C_41	41	-55	55	102	ATATTGG	TTG	YBR014C
	YBR014C_80	80	-16	16	63	CAACTGA	CTG	YBR014C
	YBR015C_59	59	-69	42	39	GTGCTGC	CTG	YBR015C
	YBR015C_66	66	-62	39	36	TCAAGGT	AGG	YBR015C
	YBR024W_63	63	-50	50	54	AGGATCT	ATC	YBR024W
	YBR028C_25	25	-56	33	30	CCTATGA	ATG	YBR028C
	YBR029C_53	53	-37	36	33	AACCTGT	CTG	YBR029C
	YBR039W_49	49	-38	33	30	CAATTGA	TTG	YBR039W
	YBR043C_85	85	-64	64	108	CATATGT	ATG	YBR043C
	YBR049C_110	110	-39	18	15	CACGTGT	GTG	YBR049C
	YBR049C_62	62	-87	42	39	ATCATCA	ATC	YBR049C
	YBR052C_22	22	-42	39	36	AGCATAC	ATA	YBR052C
	YBR052C_34	34	-30	27	24	ACTATTA	ATT	YBR052C
	YBR054W_16	16	-304	69	66	AAGATTG	ATT	YBR054W
	YBR054W_29	29	-291	75	72	CAAATAA	ATA	YBR054W
	YBR054W_38	38	-282	66	63	GTAATAT	ATA	YBR054W
	YBR059C_101	101	-49	49	72	CTCTTGT	TTG	YBR059C
	YBR059C_113	113	-37	37	60	TCCCTGT	CTG	YBR059C
	YBR059C_77	77	-73	73	96	TTTTTGC	TTG	YBR059C
	YBR059C_82	82	-68	60	57	GCTATTA	ATT	YBR059C
	YBR060C_13	13	-79	24	21	AAATTGT	TTG	YBR060C
	YBR060C_33	33	-59	59	63	TCATTGA	TTG	YBR060C
	YBR067C_11	11	-40	30	27	TAATTGC	TTG	YBR067C
	YBR067C_34	34	-17	17	45	CCTCTGC	CTG	YBR067C
	YBR067C_7	7	-44	18	15	ACAATAA	ATA	YBR067C
	YBR069C_39	39	-66	30	27	AAGCTGT	CTG	YBR069C
	YBR069C_48	48	-57	21	18	TATAAGG	AAG	YBR069C
	YBR078W_109	109	-67	67	126	CCTTTGA	TTG	YBR078W
	YBR078W_123	123	-53	21	18	AGAATAC	ATA	YBR078W
	YBR078W_133	133	-43	43	102	TATTTGA	TTG	YBR078W
	YBR078W_39	39	-137	105	102	TAAATAA	ATA	YBR078W
	YBR078W_51	51	-125	93	90	TTAATCG	ATC	YBR078W
	YBR078W_58	58	-118	21	18	TTCATTC	ATT	YBR078W
	YBR078W_78	78	-98	66	63	TTAATCT	ATC	YBR078W
	YBR078W_87	87	-89	57	54	TCCATTT	ATT	YBR078W
	YBR082C_45	45	-41	41	72	TCACTGA	CTG	YBR082C
	YBR085C-A_7	7	-22	21	18	ACAATAA	ATA	YBR085C-A
	YBR086C_110	110	-181	66	63	GCAATTA	ATT	YBR086C
	YBR086C_122	122	-169	54	51	ATAAGGG	AGG	YBR086C
	YBR086C_172	172	-119	93	90	CCAATAA	ATA	YBR086C
	YBR086C_187	187	-104	78	75	ACCATCA	ATC	YBR086C
	YBR086C_229	229	-62	36	33	TTTATGG	ATG	YBR086C
	YBR086C_47	47	-244	129	126	AAAATAG	ATA	YBR086C
	YBR086C_59	59	-232	117	114	TTTTTGC	TTG	YBR086C
	YBR120C_21	21	-62	62	102	TCATTGA	TTG	YBR120C
	YBR120C_28	28	-55	27	24	AACATTC	ATT	YBR120C
	YBR125C_126	126	-62	24	21	TTTTTGC	TTG	YBR125C
	YBR125C_51	51	-137	99	96	ACGTTGT	TTG	YBR125C
	YBR127C_18	18	-46	46	57	GCGATTG	ATT	YBR127C
	YBR132C_101	101	-51	39	36	GCCTTGT	TTG	YBR132C
	YBR133C_94	94	-65	65	138	GAATTGT	TTG	YBR133C
	YBR135W_62	62	-32	32	162	AGATTGA	TTG	YBR135W
	YBR149W_16	16	-22	22	165	GTCTTGA	TTG	YBR149W
	YBR154C_28	28	-63	51	48	CAAATTA	ATT	YBR154C
	YBR158W_217	217	-46	46	90	CGTTTGA	TTG	YBR158W
	YBR158W_95	95	-168	126	123	TCTCTGT	CTG	YBR158W
	YBR162C_28	28	-108	99	96	CTTATCC	ATC	YBR162C
	YBR162C_52	52	-84	75	72	TCAATAG	ATA	YBR162C
	YBR164C_19	19	-100	24	21	CATTTGT	TTG	YBR164C
	YBR164C_32	32	-87	69	66	GAAACGG	ACG	YBR164C
	YBR164C_68	68	-51	33	30	AAAATAA	ATA	YBR164C
	YBR187W_109	109	-20	20	30	AATACGA	ACG	YBR187W
	YBR192W_65	65	-143	102	99	AAACTGT	CTG	YBR192W
	YBR192W_80	80	-128	87	84	GTACTGC	CTG	YBR192W
	YBR194W_17	17	-52	52	75	CCAATCC	ATC	YBR194W
	YBR196C_22	22	-20	18	15	AGAATCA	ATC	YBR196C
	YBR196C_4	4	-38	36	33	GTCTTGC	TTG	YBR196C
	YBR199W_57	57	-42	27	24	ACAATTT	ATT	YBR199W
	YBR208C_54	54	-393	36	33	ATAATGA	ATG	YBR208C
	YBR208C_63	63	-384	27	24	CCAATAT	ATA	YBR208C
	YBR211C_4	4	-53	39	36	GTGTTGC	TTG	YBR211C
	YBR212W_203	203	-203	24	21	AATCTGT	CTG	YBR212W
	YBR212W_332	332	-74	74	75	ACTATTA	ATT	YBR212W
	YBR214W_27	27	-52	52	117	ACTATAA	ATA	YBR214W
	YBR214W_36	36	-43	43	108	ACTATAA	ATA	YBR214W
	YBR218C_1	1	-61	61	69	N/A	TTG	YBR218C
	YBR221C_37	37	-166	42	39	CTCTTGA	TTG	YBR221C
	YBR221C_49	49	-154	30	27	TCTCTGT	CTG	YBR221C
	YBR221C_85	85	-118	24	21	AGTATCA	ATC	YBR221C
	YBR221C_88	88	-115	21	18	ATCATTT	ATT	YBR221C
	YBR263W_10	10	-14	14	96	CTCATAG	ATA	YBR263W
	YBR270C_75	75	-197	18	15	CGAATGA	ATG	YBR270C
	YBR276C_35	35	-60	27	24	ACCATAA	ATA	YBR276C
	YBR283C_52	52	-92	18	15	GGGTTGG	TTG	YBR283C
	YBR283C_80	80	-64	30	27	GAATTGA	TTG	YBR283C
	YBR292C_341	341	-416	117	114	GGAATGA	ATG	YBR292C
	YCL017C_44	44	-50	50	54	ATCATTT	ATT	YCL017C
	YCL017C_56	56	-38	38	42	AAAATAT	ATA	YCL017C
	YCL030C_9	9	-51	27	24	CAACTGC	CTG	YCL030C
	YCL037C_20	20	-47	47	138	ACTCTGG	CTG	YCL037C
	YCL037C_41	41	-26	26	117	TTCATCT	ATC	YCL037C
	YCR002C_23	23	-32	24	21	CCCACGG	ACG	YCR002C
	YCR004C_26	26	-156	33	30	TACATTT	ATT	YCR004C
	YCR011C_82	82	-50	50	177	TCGATTT	ATT	YCR011C
	YCR012W_12	12	-28	24	21	ATTATCT	ATC	YCR012W
	YCR023C_21	21	-56	51	48	GGAATGC	ATG	YCR023C
	YCR028C_17	17	-101	54	51	GAAATGA	ATG	YCR028C
	YCR028C_66	66	-52	52	84	AAGATTG	ATT	YCR028C
	YCR030C_66	66	-19	19	48	AAATTGC	TTG	YCR030C
	YCR045W-A_84	84	-533	30	27	GTTTTGA	TTG	YCR045W-A
	YCR053W_9	9	-32	32	213	TATTTGT	TTG	YCR053W
	YCR068W_86	86	-68	24	21	AAAATTG	ATT	YCR068W
	YCR069W_97	97	-50	21	18	AGATTGG	TTG	YCR069W
	YCR088W_14	14	-32	32	90	CGCACGT	ACG	YCR088W
	YCR088W_18	18	-28	28	45	CGTATAT	ATA	YCR088W
	YDL002C_43	43	-42	39	36	TGGATGA	ATG	YDL002C
	YDL014W_42	42	-101	101	99	GTTATTC	ATT	YDL014W
	YDL014W_57	57	-86	86	84	ACAATTA	ATT	YDL014W
	YDL014W_87	87	-56	56	54	AAGTTGC	TTG	YDL014W
	YDL014W_93	93	-50	50	48	CCCATTG	ATT	YDL014W
	YDL015C_37	37	-35	33	30	TATTTGA	TTG	YDL015C
	YDL025C_83	83	-113	42	39	AAGTTGA	TTG	YDL025C
	YDL027C_32	32	-14	14	36	CATATGA	ATG	YDL027C
	YDL028C_159	159	-17	17	51	TGGATGA	ATG	YDL028C
	YDL045C_16	16	-94	30	27	AAGATTT	ATT	YDL045C
	YDL053C_109	109	-89	42	39	TCACTGT	CTG	YDL053C
	YDL053C_130	130	-68	21	18	TTTTTGT	TTG	YDL053C
	YDL053C_162	162	-36	30	27	CTTATTT	ATT	YDL053C
	YDL055C_104	104	-45	27	24	CACAAGA	AAG	YDL055C
	YDL055C_21	21	-128	27	24	CAAGTGT	GTG	YDL055C
	YDL055C_68	68	-81	63	60	AATATTT	ATT	YDL055C
	YDL055C_71	71	-78	60	57	ATTTTGT	TTG	YDL055C
	YDL055C_91	91	-58	51	48	AAAATAT	ATA	YDL055C
	YDL072C_26	26	-37	37	120	CACATTA	ATT	YDL072C
	YDL072C_41	41	-22	22	105	ACCATAG	ATA	YDL072C
	YDL073W_136	136	-50	48	45	CGTATGC	ATG	YDL073W
	YDL073W_22	22	-164	162	159	GATCTGC	CTG	YDL073W
	YDL073W_73	73	-113	111	108	CCAGTGA	GTG	YDL073W
	YDL074C_40	40	-32	32	33	TTTATGC	ATG	YDL074C
	YDL078C_28	28	-44	42	39	CACTTGT	TTG	YDL078C
	YDL081C_16	16	-50	21	18	GCTTTGT	TTG	YDL081C
	YDL081C_23	23	-43	43	51	CCAATAC	ATA	YDL081C
	YDL081C_41	41	-25	25	33	CCGATTA	ATT	YDL081C
	YDL089W_256	256	-43	42	39	ACTTTGT	TTG	YDL089W
	YDL122W_84	84	-128	45	42	GCGATTG	ATT	YDL122W
	YDL122W_93	93	-119	36	33	AAAATTC	ATT	YDL122W
	YDL126C_13	13	-31	31	36	TAACTGG	CTG	YDL126C
	YDL131W_1	1	-35	35	150	N/A	ACG	YDL131W
	YDL132W_148	148	-152	117	114	TCATTGT	TTG	YDL132W
	YDL132W_151	151	-149	114	111	TTGTTGA	TTG	YDL132W
	YDL132W_198	198	-102	24	21	ACATTGC	TTG	YDL132W
	YDL132W_60	60	-240	69	66	CAATTGA	TTG	YDL132W
	YDL132W_73	73	-227	33	30	TCACTGC	CTG	YDL132W
	YDL134C_313	313	-158	102	99	TGAATAG	ATA	YDL134C
	YDL134C_337	337	-134	78	75	AAACTGT	CTG	YDL134C
	YDL135C_14	14	-31	31	54	GTATTGA	TTG	YDL135C
	YDL137W_22	22	-451	18	15	CCTTTGT	TTG	YDL137W
	YDL138W_150	150	-26	26	27	TATATGG	ATG	YDL138W
	YDL141W_118	118	-121	120	117	ATATTGT	TTG	YDL141W
	YDL145C_176	176	-79	79	93	CAAATTC	ATT	YDL145C
	YDL146W_74	74	-117	36	33	ACAGTGA	GTG	YDL146W
	YDL155W_102	102	-28	28	36	ATTTTGT	TTG	YDL155W
	YDL160C_114	114	-170	51	48	GGATTGT	TTG	YDL160C
	YDL160C_144	144	-140	21	18	AATATAG	ATA	YDL160C
	YDL160C_185	185	-99	33	30	AAAATTC	ATT	YDL160C
	YDL160C_228	228	-56	51	48	GCCATTC	ATT	YDL160C
	YDL160C_237	237	-47	42	39	ATAATAA	ATA	YDL160C
	YDL160C_244	244	-40	40	54	CTTATCC	ATC	YDL160C
	YDL160C_96	96	-188	69	66	AATATTT	ATT	YDL160C
	YDL171C_81	81	-204	63	60	CCTATAC	ATA	YDL171C
	YDL177C_36	36	-28	28	33	TTGATGT	ATG	YDL177C
	YDL180W_21	21	-111	48	45	AGAATAT	ATA	YDL180W
	YDL185W_33	33	-65	33	30	AAGATTA	ATT	YDL185W
	YDL187C_78	78	-549	102	99	CCGATGA	ATG	YDL187C
	YDL188C_109	109	-73	73	87	TTATTGT	TTG	YDL188C
	YDL188C_115	115	-67	67	81	TTCCTGT	CTG	YDL188C
	YDL188C_130	130	-52	52	66	TTTTTGA	TTG	YDL188C
	YDL188C_145	145	-37	37	51	TTATTGG	TTG	YDL188C
	YDL188C_77	77	-105	57	54	TTCTTGT	TTG	YDL188C
	YDL190C_46	46	-147	36	33	CACATTT	ATT	YDL190C
	YDL191W_3	3	-19	19	30	ACAGTGA	GTG	YDL191W
	YDL192W_2	2	-41	30	27	N/A	AGG	YDL192W
	YDL206W_114	114	-35	30	27	TAAATGC	ATG	YDL206W
	YDL224C_106	106	-258	39	36	TCAATTG	ATT	YDL224C
	YDL224C_233	233	-131	108	105	ACTTTGC	TTG	YDL224C
	YDL224C_330	330	-34	18	15	ACGCTGA	CTG	YDL224C
	YDL224C_59	59	-305	66	63	ATAATAG	ATA	YDL224C
	YDL234C_35	35	-108	60	57	AAATTGG	TTG	YDL234C
	YDL243C_457	457	-265	57	54	GTCATGA	ATG	YDL243C
	YDR033W_197	197	-49	49	60	TTAATAT	ATA	YDR033W
	YDR033W_20	20	-226	132	129	TTATTGT	TTG	YDR033W
	YDR033W_93	93	-153	18	15	AAAATAT	ATA	YDR033W
	YDR046C_37	37	-53	53	51	TTGATGG	ATG	YDR046C
	YDR046C_52	52	-38	38	36	AGTAAGA	AAG	YDR046C
	YDR054C_57	57	-117	30	27	CGAATAG	ATA	YDR054C
	YDR062W_12	12	-348	45	42	CTCATAA	ATA	YDR062W
	YDR062W_52	52	-308	54	51	TTCATTA	ATT	YDR062W
	YDR066C_40	40	-49	24	21	AAAGTGA	GTG	YDR066C
	YDR071C_26	26	-37	24	21	AAAATAA	ATA	YDR071C
	YDR072C_56	56	-77	54	51	TAACTGT	CTG	YDR072C
	YDR072C_76	76	-57	51	48	CGGTTGG	TTG	YDR072C
	YDR072C_92	92	-41	18	15	TTTCTGC	CTG	YDR072C
	YDR077W_14	14	-17	17	18	AATACGT	ACG	YDR077W
	YDR082W_14	14	-78	51	48	TATATGA	ATG	YDR082W
	YDR086C_46	46	-47	21	18	ACTACGC	ACG	YDR086C
	YDR099W_11	11	-881	33	30	CAATTGC	TTG	YDR099W
	YDR121W_96	96	-37	37	96	TCATTGC	TTG	YDR121W
	YDR131C_1	1	-79	39	36	N/A	ATG	YDR131C
	YDR133C_151	151	-85	85	99	ACTTTGG	TTG	YDR133C
	YDR133C_4	4	-232	232	246	AGGATAA	ATA	YDR133C
	YDR133C_52	52	-184	184	198	AAAATGC	ATG	YDR133C
	YDR133C_85	85	-151	151	165	GCTATTG	ATT	YDR133C
	YDR143C_77	77	-69	51	48	AGGATAG	ATA	YDR143C
	YDR162C_96	96	-23	23	66	CCACTGA	CTG	YDR162C
	YDR164C_22	22	-20	20	30	CACATGC	ATG	YDR164C
	YDR169C_208	208	-158	21	18	AACACGA	ACG	YDR169C
	YDR169C_303	303	-63	30	27	GCTTTGT	TTG	YDR169C
	YDR172W_6	6	-38	33	30	GACTTGC	TTG	YDR172W
	YDR206W_40	40	-298	51	48	GAAATTA	ATT	YDR206W
	YDR206W_91	91	-247	45	42	TGAATGT	ATG	YDR206W
	YDR208W_55	55	-69	66	63	AGTACGA	ACG	YDR208W
	YDR214W_25	25	-91	63	60	CGTATAG	ATA	YDR214W
	YDR214W_35	35	-81	63	60	ACTTTGA	TTG	YDR214W
	YDR214W_87	87	-29	29	36	TTAATCG	ATC	YDR214W
	YDR214W_94	94	-22	22	33	TTTATAG	ATA	YDR214W
	YDR225W_11	11	-64	18	15	GATTTGG	TTG	YDR225W
	YDR225W_25	25	-50	42	39	TCAGTGA	GTG	YDR225W
	YDR226W_7	7	-16	16	21	AGCATCA	ATC	YDR226W
	YDR232W_92	92	-159	81	78	TACACGC	ACG	YDR232W
	YDR234W_11	11	-16	16	57	AAAATTG	ATT	YDR234W
	YDR247W_189	189	-180	111	108	TCACTGC	CTG	YDR247W
	YDR248C_46	46	-20	20	18	CGTATGG	ATG	YDR248C
	YDR248C_50	50	-16	16	48	TGGATGG	ATG	YDR248C
	YDR251W_133	133	-173	36	33	CCTTTGA	TTG	YDR251W
	YDR251W_255	255	-51	39	36	TTTTTGT	TTG	YDR251W
	YDR251W_52	52	-254	24	21	TTCATTA	ATT	YDR251W
	YDR251W_72	72	-234	159	156	AAATTGA	TTG	YDR251W
	YDR265W_39	39	-191	57	54	CATATGT	ATG	YDR265W
	YDR279W_40	40	-38	38	39	GCAATAG	ATA	YDR279W
	YDR280W_76	76	-32	32	78	AAATTGT	TTG	YDR280W
	YDR284C_103	103	-178	21	18	AAACTGT	CTG	YDR284C
	YDR284C_125	125	-156	36	33	AACATAC	ATA	YDR284C
	YDR284C_178	178	-103	27	24	AAACTGA	CTG	YDR284C
	YDR284C_183	183	-98	98	99	GAATTGT	TTG	YDR284C
	YDR284C_29	29	-252	57	54	TTTTTGT	TTG	YDR284C
	YDR284C_75	75	-206	27	24	CATATAT	ATA	YDR284C
	YDR284C_88	88	-193	36	33	GAAACGT	ACG	YDR284C
	YDR293C_114	114	-736	126	123	CCACTGC	CTG	YDR293C
	YDR293C_152	152	-698	48	45	ATCACGA	ACG	YDR293C
	YDR293C_279	279	-571	45	42	GCAAAGG	AAG	YDR293C
	YDR293C_292	292	-558	18	15	GTTTTGC	TTG	YDR293C
	YDR293C_417	417	-433	192	189	AACATTT	ATT	YDR293C
	YDR293C_437	437	-413	69	66	CGCATTT	ATT	YDR293C
	YDR293C_474	474	-376	135	132	TTTTTGG	TTG	YDR293C
	YDR293C_519	519	-331	90	87	GGAATAG	ATA	YDR293C
	YDR293C_546	546	-304	63	60	TTCTTGC	TTG	YDR293C
	YDR293C_557	557	-293	99	96	CTTATTT	ATT	YDR293C
	YDR293C_602	602	-248	54	51	CTTATTT	ATT	YDR293C
	YDR293C_614	614	-236	42	39	CAGCTGG	CTG	YDR293C
	YDR293C_701	701	-149	42	39	AAGTTGC	TTG	YDR293C
	YDR293C_99	99	-751	141	138	ACCATCG	ATC	YDR293C
	YDR298C_106	106	-40	27	24	CCGATTA	ATT	YDR298C
	YDR298C_26	26	-120	54	51	TCATTGA	TTG	YDR298C
	YDR298C_76	76	-70	24	21	GCATTGA	TTG	YDR298C
	YDR303C_126	126	-166	123	120	TAGCTGC	CTG	YDR303C
	YDR303C_139	139	-153	99	96	TAGATTA	ATT	YDR303C
	YDR303C_189	189	-103	60	57	CTGCTGC	CTG	YDR303C
	YDR306C_4	4	-48	24	21	AACATGT	ATG	YDR306C
	YDR310C_110	110	-168	72	69	AAACTGC	CTG	YDR310C
	YDR343C_22	22	-64	51	48	AACTTGT	TTG	YDR343C
	YDR346C_12	12	-108	87	84	CTTTTGT	TTG	YDR346C
	YDR346C_67	67	-53	53	51	TTATTGC	TTG	YDR346C
	YDR346C_76	76	-44	44	42	CGAATCA	ATC	YDR346C
	YDR347W_20	20	-44	24	21	CAGCTGG	CTG	YDR347W
	YDR349C_43	43	-62	27	24	AACTTGG	TTG	YDR349C
	YDR350C_14	14	-14	14	18	TTAATGT	ATG	YDR350C
	YDR352W_119	119	-69	39	36	CTATTGA	TTG	YDR352W
	YDR354W_2	2	-74	30	27	N/A	CTG	YDR354W
	YDR357C_13	13	-66	30	27	TACATGA	ATG	YDR357C
	YDR357C_22	22	-57	21	18	TTTGTGT	GTG	YDR357C
	YDR357C_38	38	-41	21	18	TTCATTA	ATT	YDR357C
	YDR368W_28	28	-23	23	36	AATATAC	ATA	YDR368W
	YDR372C_105	105	-166	51	48	GGTTTGG	TTG	YDR372C
	YDR372C_149	149	-122	69	66	TCCACGC	ACG	YDR372C
	YDR372C_182	182	-89	36	33	TCATTGT	TTG	YDR372C
	YDR372C_65	65	-206	60	57	CCGTTGC	TTG	YDR372C
	YDR372C_74	74	-197	51	48	ACTCTGT	CTG	YDR372C
	YDR382W_58	58	-23	23	24	GTAATAT	ATA	YDR382W
	YDR387C_67	67	-79	72	69	TCCATGG	ATG	YDR387C
	YDR394W_58	58	-64	45	42	CTCATAA	ATA	YDR394W
	YDR395W_75	75	-41	41	63	ACATTGC	TTG	YDR395W
	YDR399W_40	40	-29	29	27	TTCGTGT	GTG	YDR399W
	YDR404C_109	109	-83	18	15	ACCATTC	ATT	YDR404C
	YDR414C_54	54	-143	36	33	TTGATGG	ATG	YDR414C
	YDR434W_75	75	-51	30	27	GGGATAA	ATA	YDR434W
	YDR441C_56	56	-79	27	24	CCAATCG	ATC	YDR441C
	YDR441C_65	65	-70	18	15	CAGATAA	ATA	YDR441C
	YDR452W_94	94	-56	30	27	TCCTTGT	TTG	YDR452W
	YDR453C_12	12	-56	30	27	ACTATTA	ATT	YDR453C
	YDR453C_3	3	-65	39	36	AAAGTGA	GTG	YDR453C
	YDR466W_41	41	-54	51	48	AGGCTGA	CTG	YDR466W
	YDR468C_70	70	-24	21	18	GTATTGC	TTG	YDR468C
	YDR481C_22	22	-33	18	15	AGCATAC	ATA	YDR481C
	YDR490C_41	41	-44	44	60	AACTTGC	TTG	YDR490C
	YDR492W_60	60	-94	54	51	ATTCTGG	CTG	YDR492W
	YDR497C_16	16	-59	59	138	TTATTGG	TTG	YDR497C
	YDR502C_13	13	-35	33	30	AATATAT	ATA	YDR502C
	YDR502C_22	22	-26	24	21	AGTATTT	ATT	YDR502C
	YDR505C_135	135	-94	24	21	GTATTGA	TTG	YDR505C
	YDR505C_167	167	-62	62	114	AAAACGA	ACG	YDR505C
	YDR505C_191	191	-38	38	90	GCGGTGT	GTG	YDR505C
	YDR516C_20	20	-32	32	30	GAATTGT	TTG	YDR516C
	YDR524C-B_20	20	-25	25	81	TCAATCA	ATC	YDR524C-B
	YDR531W_33	33	-17	17	90	TGCATGC	ATG	YDR531W
	YEL002C_7	7	-43	42	39	CAATTGA	TTG	YEL002C
	YEL009C_117	117	-454	72	69	CTCATCT	ATC	YEL009C
	YEL009C_129	129	-442	60	57	GCAATCA	ATC	YEL009C
	YEL009C_140	140	-431	27	24	AAAATAT	ATA	YEL009C
	YEL009C_162	162	-409	27	24	TTTATTA	ATT	YEL009C
	YEL009C_179	179	-392	18	15	AGTATCG	ATC	YEL009C
	YEL009C_249	249	-322	78	75	TAGATTA	ATT	YEL009C
	YEL009C_292	292	-279	54	51	TTATTGA	TTG	YEL009C
	YEL009C_322	322	-249	24	21	TTAATTA	ATT	YEL009C
	YEL013W_124	124	-125	75	72	AAAATAA	ATA	YEL013W
	YEL013W_136	136	-113	63	60	TATATAT	ATA	YEL013W
	YEL016C_63	63	-120	57	54	TTGATGG	ATG	YEL016C
	YEL016C_87	87	-96	33	30	TATATGA	ATG	YEL016C
	YEL023C_104	104	-465	102	99	TAAATGT	ATG	YEL023C
	YEL023C_117	117	-452	39	36	TATATTA	ATT	YEL023C
	YEL023C_126	126	-443	30	27	AGTATGA	ATG	YEL023C
	YEL023C_173	173	-396	33	30	TTGAAGT	AAG	YEL023C
	YEL023C_43	43	-526	42	39	AAATTGT	TTG	YEL023C
	YEL026W_49	49	-41	27	24	AACTTGA	TTG	YEL026W
	YEL026W_62	62	-28	28	111	CAGATTT	ATT	YEL026W
	YEL027W_7	7	-56	30	27	TTATTGC	TTG	YEL027W
	YEL034W_34	34	-19	19	24	CAAATAC	ATA	YEL034W
	YEL036C_125	125	-20	20	18	TTCATGC	ATG	YEL036C
	YEL036C_85	85	-60	21	18	ATCATCT	ATC	YEL036C
	YEL039C_68	68	-102	78	75	AGGTTGA	TTG	YEL039C
	YEL042W_50	50	-152	132	129	AATATAA	ATA	YEL042W
	YEL050C_16	16	-35	35	45	GAAATAC	ATA	YEL050C
	YEL051W_30	30	-17	17	54	ATTGTGA	GTG	YEL051W
	YEL063C_105	105	-126	27	24	GAAATAT	ATA	YEL063C
	YEL063C_84	84	-147	48	45	TTTACGT	ACG	YEL063C
	YER012W_30	30	-31	31	84	TTCATAT	ATA	YER012W
	YER020W_40	40	-23	23	144	ATCACGC	ACG	YER020W
	YER027C_24	24	-48	45	42	ATTTTGT	TTG	YER027C
	YER035W_49	49	-26	26	24	ATAATAG	ATA	YER035W
	YER048C_20	20	-56	21	18	TAATTGT	TTG	YER048C
	YER048C_3	3	-73	48	45	AAAAAGA	AAG	YER048C
	YER056C_13	13	-74	27	24	GTAATAG	ATA	YER056C
	YER056C_56	56	-31	31	48	AACATCC	ATC	YER056C
	YER056C_68	68	-19	19	36	TCTATTA	ATT	YER056C
	YER057C_26	26	-17	17	30	ATCATCA	ATC	YER057C
	YER057C_8	8	-35	35	48	AAAATTT	ATT	YER057C
	YER067W_10	10	-66	24	21	GCATTGT	TTG	YER067W
	YER076C_1	1	-139	42	39	N/A	ATG	YER076C
	YER089C_116	116	-196	48	45	GGAATAA	ATA	YER089C
	YER089C_134	134	-178	30	27	GTTCTGT	CTG	YER089C
	YER089C_264	264	-48	30	27	ATTTTGA	TTG	YER089C
	YER089C_276	276	-36	18	15	CCATTGT	TTG	YER089C
	YER094C_31	31	-59	45	42	AGAGTGC	GTG	YER094C
	YER094C_58	58	-32	18	15	AAAATAT	ATA	YER094C
	YER100W_181	181	-96	51	48	GCCGTGA	GTG	YER100W
	YER107C_139	139	-54	21	18	AATCTGC	CTG	YER107C
	YER107C_73	73	-120	45	42	GAATTGG	TTG	YER107C
	YER110C_34	34	-78	27	24	TTTCTGT	CTG	YER110C
	YER110C_72	72	-40	36	33	AAACTGA	CTG	YER110C
	YER111C_240	240	-96	81	78	ACAATAA	ATA	YER111C
	YER111C_251	251	-85	85	93	TCTTTGC	TTG	YER111C
	YER111C_290	290	-46	46	54	CTTCTGT	CTG	YER111C
	YER115C_10	10	-207	54	51	AGTATGT	ATG	YER115C
	YER118C_121	121	-71	71	90	AATTTGA	TTG	YER118C
	YER118C_133	133	-59	59	78	ACATTGG	TTG	YER118C
	YER118C_146	146	-46	46	81	TAGATCA	ATC	YER118C
	YER118C_155	155	-37	37	72	GCCATCT	ATC	YER118C
	YER123W_44	44	-144	24	21	GTACTGG	CTG	YER123W
	YER136W_36	36	-39	18	15	ATCATAA	ATA	YER136W
	YER148W_167	167	-26	24	21	CAGGTGT	GTG	YER148W
	YER148W_98	98	-95	93	90	AGACTGC	CTG	YER148W
	YER159C_10	10	-173	27	24	CGAAAGA	AAG	YER159C
	YER165W_34	34	-108	36	33	CGTTTGA	TTG	YER165W
	YFL004W_19	19	-71	71	84	AAAATAG	ATA	YFL004W
	YFL005W_5	5	-132	21	18	CCTATTG	ATT	YFL005W
	YFL005W_75	75	-62	60	57	GACATAC	ATA	YFL005W
	YFL005W_78	78	-59	57	54	ATACTGT	CTG	YFL005W
	YFL018C_29	29	-50	50	54	GTTTTGT	TTG	YFL018C
	YFL018C_36	36	-43	43	69	TCGATTG	ATT	YFL018C
	YFL018C_53	53	-26	26	30	ACCATCA	ATC	YFL018C
	YFL018C_57	57	-22	22	48	TCAAAGA	AAG	YFL018C
	YFL039C_35	35	-85	78	75	AGAATAG	ATA	YFL039C
	YFL039C_40	40	-80	24	21	AGGATCT	ATC	YFL039C
	YFL039C_97	97	-23	21	18	AAGATCG	ATC	YFL039C
	YFL045C_19	19	-56	42	39	ACAATTT	ATT	YFL045C
	YFL050C_80	80	-699	105	102	AAAATTT	ATT	YFL050C
	YFR009W_30	30	-46	36	33	AAAACGT	ACG	YFR009W
	YFR017C_4	4	-74	18	15	GCGATGA	ATG	YFR017C
	YFR031C-A_8	8	-16	16	21	ACCATTA	ATT	YFR031C-A
	YFR049W_25	25	-137	42	39	AGATTGC	TTG	YFR049W
	YFR050C_18	18	-35	35	36	TTCATCT	ATC	YFR050C
	YFR050C_37	37	-16	16	111	AACATAA	ATA	YFR050C
	YFR053C_11	11	-85	84	81	ACAATTG	ATT	YFR053C
	YFR053C_31	31	-65	21	18	TCAATTA	ATT	YFR053C
	YFR053C_74	74	-22	21	18	TCAATTA	ATT	YFR053C
	YGL008C_217	217	-19	19	24	TTAATTA	ATT	YGL008C
	YGL008C_4	4	-232	60	57	ATAGTGA	GTG	YGL008C
	YGL009C_17	17	-54	51	48	ATATTGA	TTG	YGL009C
	YGL009C_23	23	-48	45	42	AAATTGA	TTG	YGL009C
	YGL009C_33	33	-38	38	189	TTTTTGT	TTG	YGL009C
	YGL009C_51	51	-20	20	171	TTTATTA	ATT	YGL009C
	YGL018C_19	19	-16	16	135	AAGAAGC	AAG	YGL018C
	YGL019W_25	25	-51	36	33	AAATTGG	TTG	YGL019W
	YGL019W_33	33	-43	24	21	GAATTGG	TTG	YGL019W
	YGL022W_12	12	-53	53	252	GCAATCG	ATC	YGL022W
	YGL022W_31	31	-34	34	150	TAAATCC	ATC	YGL022W
	YGL022W_43	43	-22	22	138	ACCATTC	ATT	YGL022W
	YGL028C_102	102	-65	65	66	TCTCTGT	CTG	YGL028C
	YGL028C_127	127	-40	21	18	ATTACGC	ACG	YGL028C
	YGL028C_9	9	-158	60	57	ACTATAA	ATA	YGL028C
	YGL030W_38	38	-20	20	93	TCAATTA	ATT	YGL030W
	YGL032C_28	28	-108	42	39	GATATGT	ATG	YGL032C
	YGL032C_47	47	-89	18	15	TTGACGT	ACG	YGL032C
	YGL035C_106	106	-25	25	57	ATAGTGG	GTG	YGL035C
	YGL037C_42	42	-46	46	66	TTTACGA	ACG	YGL037C
	YGL037C_45	45	-43	43	63	ACGATTA	ATT	YGL037C
	YGL040C_34	34	-42	27	24	TTATTGC	TTG	YGL040C
	YGL044C_34	34	-193	105	102	ATAATTG	ATT	YGL044C
	YGL044C_49	49	-178	90	87	ACCATAA	ATA	YGL044C
	YGL044C_61	61	-166	78	75	ATCTTGC	TTG	YGL044C
	YGL049C_110	110	-64	48	45	AGGCTGT	CTG	YGL049C
	YGL049C_119	119	-55	39	36	TTACTGT	CTG	YGL049C
	YGL049C_125	125	-49	33	30	TTCCTGA	CTG	YGL049C
	YGL049C_29	29	-145	51	48	GCCTTGA	TTG	YGL049C
	YGL049C_76	76	-98	33	30	AAGATAA	ATA	YGL049C
	YGL058W_21	21	-39	33	30	AAGATTA	ATT	YGL058W
	YGL063W_129	129	-65	24	21	GTGATGA	ATG	YGL063W
	YGL071W_140	140	-318	45	42	AGGTTGA	TTG	YGL071W
	YGL077C_133	133	-38	24	21	TAACTGG	CTG	YGL077C
	YGL077C_140	140	-31	31	45	CTCATTT	ATT	YGL077C
	YGL077C_75	75	-96	36	33	TGCATAA	ATA	YGL077C
	YGL077C_85	85	-86	48	45	AAAATTA	ATT	YGL077C
	YGL087C_2	2	-34	34	57	N/A	ATG	YGL087C
	YGL094C_165	165	-14	14	15	TGAATGG	ATG	YGL094C
	YGL114W_5	5	-247	63	60	ATAAGGG	AGG	YGL114W
	YGL115W_44	44	-77	27	24	AAATTGT	TTG	YGL115W
	YGL116W_47	47	-99	60	57	ACTTTGA	TTG	YGL116W
	YGL123W_47	47	-51	48	45	TCCGTGT	GTG	YGL123W
	YGL123W_63	63	-35	18	15	ACTATAA	ATA	YGL123W
	YGL123W_77	77	-21	18	15	CCAATAA	ATA	YGL123W
	YGL146C_34	34	-80	57	54	CTTATGA	ATG	YGL146C
	YGL160W_13	13	-100	39	36	ATTTTGA	TTG	YGL160W
	YGL167C_155	155	-221	48	45	ATCTTGT	TTG	YGL167C
	YGL167C_17	17	-359	30	27	CCGATCG	ATC	YGL167C
	YGL167C_230	230	-146	132	129	ATCATAA	ATA	YGL167C
	YGL167C_276	276	-100	93	90	ACAATAC	ATA	YGL167C
	YGL167C_320	320	-56	42	39	AAGACGA	ACG	YGL167C
	YGL167C_70	70	-306	51	48	ATTTTGT	TTG	YGL167C
	YGL167C_88	88	-288	33	30	AAGATTC	ATT	YGL167C
	YGL190C_203	203	-342	96	93	AAGATAA	ATA	YGL190C
	YGL190C_260	260	-285	39	36	AGACTGG	CTG	YGL190C
	YGL190C_292	292	-253	30	27	CGCATTC	ATT	YGL190C
	YGL190C_358	358	-187	36	33	GTCCTGT	CTG	YGL190C
	YGL190C_366	366	-179	24	21	TCGATTT	ATT	YGL190C
	YGL190C_86	86	-459	48	45	CAATTGG	TTG	YGL190C
	YGL194C-A_55	55	-200	78	75	CGTATTC	ATT	YGL194C-A
	YGL202W_51	51	-72	18	15	CTTATTT	ATT	YGL202W
	YGL202W_83	83	-40	40	51	CAGTTGA	TTG	YGL202W
	YGL202W_95	95	-28	28	39	ACATTGA	TTG	YGL202W
	YGL203C_39	39	-38	38	69	ACCTTGG	TTG	YGL203C
	YGL206C_81	81	-32	32	33	ACTATAA	ATA	YGL206C
	YGL206C_87	87	-26	26	27	AAAATAA	ATA	YGL206C
	YGL207W_60	60	-46	21	18	TTTCTGA	CTG	YGL207W
	YGL207W_82	82	-24	18	15	GAACTGG	CTG	YGL207W
	YGL224C_17	17	-85	85	93	TTCTTGA	TTG	YGL224C
	YGL224C_65	65	-37	37	45	TACATGA	ATG	YGL224C
	YGL248W_8	8	-56	56	72	AAAGTGG	GTG	YGL248W
	YGL256W_437	437	-61	45	42	CTATTGC	TTG	YGL256W
	YGL257C_49	49	-60	39	36	CGCATGA	ATG	YGL257C
	YGL257C_70	70	-39	18	15	GCAGTGA	GTG	YGL257C
	YGR020C_18	18	-46	36	33	TACATTT	ATT	YGR020C
	YGR020C_43	43	-21	18	15	TCACTGA	CTG	YGR020C
	YGR020C_6	6	-58	48	45	AAAATAG	ATA	YGR020C
	YGR024C_20	20	-44	44	69	GTCATGT	ATG	YGR024C
	YGR024C_30	30	-34	24	21	TTAATGT	ATG	YGR024C
	YGR033C_30	30	-47	47	48	AGGTTGG	TTG	YGR033C
	YGR034W_1	1	-26	26	42	N/A	ACG	YGR034W
	YGR034W_13	13	-14	14	30	CCAAAGA	AAG	YGR034W
	YGR036C_115	115	-50	50	51	ATTATAC	ATA	YGR036C
	YGR036C_148	148	-17	17	18	GTTTTGA	TTG	YGR036C
	YGR036C_37	37	-128	57	54	AAAGTGA	GTG	YGR036C
	YGR038W_105	105	-33	30	27	ATTTTGT	TTG	YGR038W
	YGR041W_117	117	-198	63	60	ACTATTT	ATT	YGR041W
	YGR041W_130	130	-185	57	54	CATTTGC	TTG	YGR041W
	YGR041W_176	176	-139	51	48	AATTTGA	TTG	YGR041W
	YGR054W_117	117	-54	42	39	TCGATAA	ATA	YGR054W
	YGR054W_127	127	-44	39	36	AACATAG	ATA	YGR054W
	YGR054W_148	148	-23	18	15	GTCAGGT	AGG	YGR054W
	YGR054W_28	28	-143	45	42	TTTACGG	ACG	YGR054W
	YGR054W_75	75	-96	24	21	GTGTTGA	TTG	YGR054W
	YGR054W_86	86	-85	45	42	GACGTGT	GTG	YGR054W
	YGR054W_89	89	-82	42	39	GTGTTGT	TTG	YGR054W
	YGR057C_38	38	-25	24	21	TAAATGG	ATG	YGR057C
	YGR065C_16	16	-110	24	21	TGCATGA	ATG	YGR065C
	YGR071C_31	31	-26	26	27	CATATGT	ATG	YGR071C
	YGR086C_31	31	-50	50	69	CCATTGT	TTG	YGR086C
	YGR086C_50	50	-31	30	27	AAAGTGA	GTG	YGR086C
	YGR086C_67	67	-14	14	33	AGCATCA	ATC	YGR086C
	YGR090W_101	101	-190	105	102	AGGACGT	ACG	YGR090W
	YGR095C_8	8	-62	39	36	TATATGG	ATG	YGR095C
	YGR105W_10	10	-48	24	21	ATACTGG	CTG	YGR105W
	YGR119C_34	34	-55	51	48	ACTATTC	ATT	YGR119C
	YGR119C_43	43	-46	42	39	GAAACGC	ACG	YGR119C
	YGR122C-A_56	56	-198	69	66	ATTATGT	ATG	YGR122C-A
	YGR135W_60	60	-32	21	18	TAATTGA	TTG	YGR135W
	YGR138C_152	152	-128	54	51	TAATTGA	TTG	YGR138C
	YGR138C_171	171	-109	66	63	TCAAAGC	AAG	YGR138C
	YGR138C_176	176	-104	30	27	GCCCTGC	CTG	YGR138C
	YGR138C_33	33	-247	87	84	TTATTGT	TTG	YGR138C
	YGR148C_115	115	-306	30	27	ACAATGC	ATG	YGR148C
	YGR157W_201	201	-52	52	63	GCCCTGA	CTG	YGR157W
	YGR157W_92	92	-161	27	24	TTCATTT	ATT	YGR157W
	YGR161C_20	20	-74	74	72	ATCATTC	ATT	YGR161C
	YGR166W_30	30	-50	30	27	TATATGG	ATG	YGR166W
	YGR167W_10	10	-40	40	78	CAGTTGA	TTG	YGR167W
	YGR168C_16	16	-25	21	18	CTAATGA	ATG	YGR168C
	YGR169C-A_37	37	-67	63	60	AGAATTT	ATT	YGR169C-A
	YGR169C-A_59	59	-45	27	24	AACCTGC	CTG	YGR169C-A
	YGR174W-A_715	715	-81	36	33	ATTATGT	ATG	YGR174W-A
	YGR178C_104	104	-109	24	21	GAATTGA	TTG	YGR178C
	YGR178C_160	160	-53	53	54	AAACTGA	CTG	YGR178C
	YGR178C_188	188	-25	25	39	TTAAAGG	AAG	YGR178C
	YGR178C_31	31	-182	126	123	GATATAG	ATA	YGR178C
	YGR178C_68	68	-145	60	57	TTTTTGT	TTG	YGR178C
	YGR180C_5	5	-22	22	33	GCAACGC	ACG	YGR180C
	YGR181W_27	27	-22	22	153	AGTTTGA	TTG	YGR181W
	YGR188C_27	27	-20	20	21	TGAATGT	ATG	YGR188C
	YGR189C_27	27	-35	35	36	AATATAA	ATA	YGR189C
	YGR189C_36	36	-26	26	27	TTCATAA	ATA	YGR189C
	YGR191W_140	140	-89	30	27	TCATTGT	TTG	YGR191W
	YGR191W_162	162	-67	24	21	TTGACGT	ACG	YGR191W
	YGR191W_189	189	-40	40	45	CTCATTA	ATT	YGR191W
	YGR192C_16	16	-23	23	72	CGAATAA	ATA	YGR192C
	YGR210C_76	76	-34	27	24	AAGCTGT	CTG	YGR210C
	YGR218W_159	159	-140	30	27	TCAATTA	ATT	YGR218W
	YGR221C_21	21	-66	33	30	GAAATAT	ATA	YGR221C
	YGR229C_193	193	-83	33	30	GCTATAC	ATA	YGR229C
	YGR229C_241	241	-35	35	147	TCTATAG	ATA	YGR229C
	YGR229C_253	253	-23	23	135	AACTTGG	TTG	YGR229C
	YGR229C_3	3	-273	36	33	GCGCTGC	CTG	YGR229C
	YGR229C_97	97	-179	27	24	AGCCTGT	CTG	YGR229C
	YGR240C_114	114	-119	66	63	AATATAG	ATA	YGR240C
	YGR240C_126	126	-107	54	51	GAAATTT	ATT	YGR240C
	YGR240C_141	141	-92	39	36	TTAATTT	ATT	YGR240C
	YGR240C_151	151	-82	18	15	AACAGGT	AGG	YGR240C
	YGR240C_211	211	-22	22	75	AATCTGA	CTG	YGR240C
	YGR240C_31	31	-202	51	48	AATCTGT	CTG	YGR240C
	YGR240C_49	49	-184	33	30	GGATTGT	TTG	YGR240C
	YGR240C_78	78	-155	21	18	TAAATAA	ATA	YGR240C
	YGR241C_77	77	-93	66	63	CGCTTGC	TTG	YGR241C
	YGR241C_89	89	-81	54	51	TCTACGA	ACG	YGR241C
	YGR245C_32	32	-55	55	60	ATAATAG	ATA	YGR245C
	YGR245C_59	59	-28	28	33	GCACTGA	CTG	YGR245C
	YGR247W_100	100	-49	30	27	AGTTTGG	TTG	YGR247W
	YGR247W_123	123	-26	26	33	AATTTGC	TTG	YGR247W
	YGR253C_38	38	-22	22	33	CAATTGT	TTG	YGR253C
	YGR255C_17	17	-76	30	27	ATAATTG	ATT	YGR255C
	YGR255C_26	26	-67	21	18	GCGATAA	ATA	YGR255C
	YGR267C_14	14	-161	161	177	CGACTGA	CTG	YGR267C
	YGR267C_8	8	-167	167	183	ATAATCC	ATC	YGR267C
	YGR267C_87	87	-88	48	45	TTCATAA	ATA	YGR267C
	YGR279C_18	18	-77	77	93	TAAATCC	ATC	YGR279C
	YGR281W_189	189	-37	37	147	TTTATAT	ATA	YGR281W
	YGR281W_82	82	-144	69	66	TTTTTGC	TTG	YGR281W
	YGR281W_89	89	-137	87	84	GCTATAC	ATA	YGR281W
	YHL010C_5	5	-31	31	42	TGAATGT	ATG	YHL010C
	YHL011C_32	32	-68	68	93	ACTTTGC	TTG	YHL011C
	YHL011C_45	45	-55	27	24	AGGATAA	ATA	YHL011C
	YHL011C_68	68	-32	32	57	AAACTGA	CTG	YHL011C
	YHL020C_27	27	-57	39	36	ACAGTGC	GTG	YHL020C
	YHL020C_30	30	-54	36	33	GTGCTGA	CTG	YHL020C
	YHL034C_17	17	-102	21	18	AAAATAA	ATA	YHL034C
	YHL034C_20	20	-99	18	15	ATAATCA	ATC	YHL034C
	YHL034C_54	54	-65	65	99	GTTATCA	ATC	YHL034C
	YHR004C_59	59	-62	36	33	ATTTTGC	TTG	YHR004C
	YHR005C_12	12	-32	21	18	GAGGTGT	GTG	YHR005C
	YHR007C_40	40	-102	24	21	GTAATAA	ATA	YHR007C
	YHR007C_43	43	-99	21	18	ATAATTT	ATT	YHR007C
	YHR007C_63	63	-79	72	69	TTAATAG	ATA	YHR007C
	YHR007C_96	96	-46	39	36	ACAATTG	ATT	YHR007C
	YHR008C_2	2	-32	32	60	N/A	TTG	YHR008C
	YHR009C_165	165	-70	33	30	TTCGTGC	GTG	YHR009C
	YHR009C_56	56	-179	132	129	ATATTGT	TTG	YHR009C
	YHR009C_86	86	-149	102	99	CTATTGT	TTG	YHR009C
	YHR018C_8	8	-47	47	105	CAATTGA	TTG	YHR018C
	YHR020W_4	4	-69	45	42	TACATCC	ATC	YHR020W
	YHR021C_7	7	-28	28	69	CAGATAA	ATA	YHR021C
	YHR026W_35	35	-80	80	78	AGTATCA	ATC	YHR026W
	YHR030C_107	107	-97	45	42	GAACTGT	CTG	YHR030C
	YHR030C_175	175	-29	29	42	TAATTGA	TTG	YHR030C
	YHR039C_8	8	-102	18	15	CCGATGG	ATG	YHR039C
	YHR043C_38	38	-64	33	30	AACACGT	ACG	YHR043C
	YHR050W_115	115	-68	68	66	GTTTTGA	TTG	YHR050W
	YHR050W_141	141	-42	18	15	CTATTGC	TTG	YHR050W
	YHR059W_20	20	-32	32	33	ACAATAA	ATA	YHR059W
	YHR068W_13	13	-43	43	117	GTCGTGT	GTG	YHR068W
	YHR072W-A_9	9	-26	21	18	CCAATAC	ATA	YHR072W-A
	YHR079C_88	88	-165	138	135	TAACTGG	CTG	YHR079C
	YHR084W_232	232	-88	69	66	ATATTGA	TTG	YHR084W
	YHR098C_34	34	-46	46	72	ATTTTGA	TTG	YHR098C
	YHR104W_42	42	-57	21	18	AAGACGA	ACG	YHR104W
	YHR104W_46	46	-53	51	48	CGATTGG	TTG	YHR104W
	YHR115C_136	136	-47	47	228	ACAGTGT	GTG	YHR115C
	YHR129C_56	56	-48	33	30	TACATGC	ATG	YHR129C
	YHR129C_62	62	-42	27	24	CTAATGC	ATG	YHR129C
	YHR131C_47	47	-31	31	69	GACATCG	ATC	YHR131C
	YHR135C_87	87	-34	34	69	CGCATTC	ATT	YHR135C
	YHR138C_2	2	-70	63	60	N/A	ATG	YHR138C
	YHR143W_236	236	-32	18	15	GAAATAA	ATA	YHR143W
	YHR155W_8	8	-86	21	18	CTGATGG	ATG	YHR155W
	YHR159W_33	33	-42	33	30	TACATGG	ATG	YHR159W
	YHR161C_11	11	-127	27	24	GCGATAT	ATA	YHR161C
	YHR162W_16	16	-161	39	36	CACATCG	ATC	YHR162W
	YHR162W_51	51	-126	90	87	GAAATAG	ATA	YHR162W
	YHR162W_65	65	-112	60	57	ACCATTA	ATT	YHR162W
	YHR165C_31	31	-74	39	36	AATTTGA	TTG	YHR165C
	YHR183W_22	22	-55	54	51	AACCTGT	CTG	YHR183W
	YHR183W_27	27	-50	50	69	GTATTGT	TTG	YHR183W
	YHR183W_30	30	-47	47	66	TTGTTGC	TTG	YHR183W
	YHR190W_18	18	-31	31	123	AAAACGT	ACG	YHR190W
	YHR195W_95	95	-79	79	147	AAATTGG	TTG	YHR195W
	YHR205W_133	133	-274	171	168	GCACTGA	CTG	YHR205W
	YHR205W_139	139	-268	165	162	AAAATAG	ATA	YHR205W
	YHR205W_155	155	-252	135	132	ACTTTGC	TTG	YHR205W
	YHR205W_217	217	-190	87	84	TTCGTGG	GTG	YHR205W
	YHR205W_235	235	-172	69	66	AATTTGC	TTG	YHR205W
	YHR205W_330	330	-77	60	57	CTTTTGG	TTG	YHR205W
	YHR205W_68	68	-339	69	66	TCGCTGG	CTG	YHR205W
	YHR205W_90	90	-317	144	141	TTTTTGT	TTG	YHR205W
	YHR206W_350	350	-136	63	60	ATTCTGT	CTG	YHR206W
	YHR206W_464	464	-22	22	42	TCGTTGC	TTG	YHR206W
	YHR210C_25	25	-81	54	51	AGAATGT	ATG	YHR210C
	YIL002C_126	126	-26	26	27	CGTATGA	ATG	YIL002C
	YIL002C_64	64	-88	66	63	CAAATAG	ATA	YIL002C
	YIL005W_77	77	-56	33	30	GAAATTC	ATT	YIL005W
	YIL029C_12	12	-93	27	24	GTTATGC	ATG	YIL029C
	YIL029C_21	21	-84	18	15	ACCATCA	ATC	YIL029C
	YIL033C_23	23	-85	30	27	TCCATTA	ATT	YIL033C
	YIL033C_57	57	-51	42	39	AAGATCA	ATC	YIL033C
	YIL033C_75	75	-33	24	21	CAGATTA	ATT	YIL033C
	YIL038C_152	152	-86	86	147	AAAATCA	ATC	YIL038C
	YIL038C_221	221	-17	17	78	TGTATGT	ATG	YIL038C
	YIL038C_71	71	-167	167	228	ATTTTGT	TTG	YIL038C
	YIL038C_74	74	-164	164	225	TTGTTGA	TTG	YIL038C
	YIL048W_120	120	-185	96	93	AGCCTGA	CTG	YIL048W
	YIL050W_22	22	-92	84	81	AAAATAG	ATA	YIL050W
	YIL052C_15	15	-16	16	66	GCAACGA	ACG	YIL052C
	YIL053W_11	11	-17	17	24	CAAATAT	ATA	YIL053W
	YIL059C_496	496	-52	52	126	CACATGG	ATG	YIL059C
	YIL069C_14	14	-31	31	36	CAAACGC	ACG	YIL069C
	YIL069C_8	8	-37	37	42	TCACTGC	CTG	YIL069C
	YIL090W_53	53	-85	33	30	GTTTTGC	TTG	YIL090W
	YIL119C_99	99	-102	33	30	TTCATGG	ATG	YIL119C
	YIR018C-A_107	107	-648	75	72	AGTTTGA	TTG	YIR018C-A
	YIR018C-A_137	137	-618	45	42	AGTATGT	ATG	YIR018C-A
	YIR031C_24	24	-97	51	48	AAAATGG	ATG	YIR031C
	YJL002C_25	25	-31	27	24	AAGACGC	ACG	YJL002C
	YJL002C_42	42	-14	14	15	ATATTGG	TTG	YJL002C
	YJL003W_18	18	-29	29	72	CAACTGA	CTG	YJL003W
	YJL005W_81	81	-59	59	129	CTATTGT	TTG	YJL005W
	YJL026W_20	20	-23	23	120	TACACGT	ACG	YJL026W
	YJL041W_17	17	-41	41	42	GCAACGC	ACG	YJL041W
	YJL052W_14	14	-60	42	39	GGTTTGA	TTG	YJL052W
	YJL079C_36	36	-128	60	57	TAGTTGC	TTG	YJL079C
	YJL094C_22	22	-23	23	36	AAGTTGT	TTG	YJL094C
	YJL101C_70	70	-73	42	39	AAATTGA	TTG	YJL101C
	YJL124C_131	131	-41	41	180	CCTATAA	ATA	YJL124C
	YJL124C_53	53	-119	119	258	GTTATAT	ATA	YJL124C
	YJL124C_79	79	-93	18	15	GGATTGC	TTG	YJL124C
	YJL127C_33	33	-35	30	27	AAAGTGA	GTG	YJL127C
	YJL128C_141	141	-80	36	33	AAACTGA	CTG	YJL128C
	YJL129C_122	122	-165	48	45	TTTTTGT	TTG	YJL129C
	YJL129C_131	131	-156	39	36	CTGTTGC	TTG	YJL129C
	YJL129C_149	149	-138	21	18	CCATTGT	TTG	YJL129C
	YJL129C_187	187	-100	72	69	CACTTGT	TTG	YJL129C
	YJL129C_92	92	-195	78	75	AAGATAA	ATA	YJL129C
	YJL138C_13	13	-38	21	18	GGACTGG	CTG	YJL138C
	YJL139C_29	29	-54	27	24	CTAATGC	ATG	YJL139C
	YJL140W_2	2	-92	27	24	N/A	ATG	YJL140W
	YJL158C_2	2	-35	35	57	N/A	ATA	YJL158C
	YJL162C_23	23	-26	26	36	TTTATGC	ATG	YJL162C
	YJL164C_101	101	-118	69	66	TTTTTGT	TTG	YJL164C
	YJL164C_110	110	-109	60	57	GGCTTGC	TTG	YJL164C
	YJL164C_63	63	-156	102	99	AATTTGA	TTG	YJL164C
	YJL164C_81	81	-138	84	81	AATCTGA	CTG	YJL164C
	YJL165C_9	9	-125	81	78	TACGTGT	GTG	YJL165C
	YJL166W_16	16	-50	50	48	CGTACGT	ACG	YJL166W
	YJL166W_9	9	-57	24	21	AAGTTGT	TTG	YJL166W
	YJL167W_31	31	-25	25	45	ACAATAA	ATA	YJL167W
	YJL174W_40	40	-75	72	69	GTTTTGA	TTG	YJL174W
	YJL174W_88	88	-27	24	21	AGAATCA	ATC	YJL174W
	YJL174W_98	98	-17	17	15	ACTGTGA	GTG	YJL174W
	YJL176C_8	8	-55	55	72	GCGATAT	ATA	YJL176C
	YJR007W_17	17	-79	79	105	AATCTGT	CTG	YJR007W
	YJR007W_35	35	-61	61	87	TTTTTGT	TTG	YJR007W
	YJR009C_16	16	-32	32	81	CAAATTA	ATT	YJR009C
	YJR044C_37	37	-55	55	156	CGCATAT	ATA	YJR044C
	YJR044C_43	43	-49	49	150	TTTATCA	ATC	YJR044C
	YJR045C_18	18	-121	121	132	CCTCTGC	CTG	YJR045C
	YJR045C_25	25	-114	78	75	CTGCTGT	CTG	YJR045C
	YJR045C_77	77	-62	21	18	CTTTTGT	TTG	YJR045C
	YJR045C_85	85	-54	18	15	TTTACGA	ACG	YJR045C
	YJR045C_99	99	-40	40	51	AATATAA	ATA	YJR045C
	YJR090C_162	162	-130	130	141	AAAATTA	ATT	YJR090C
	YJR090C_72	72	-220	75	72	ACAATAA	ATA	YJR090C
	YJR090C_75	75	-217	72	69	ATAATTC	ATT	YJR090C
	YJR134C_16	16	-25	25	30	TGTATGG	ATG	YJR134C
	YJR143C_30	30	-29	29	84	AAGATAT	ATA	YJR143C
	YKL004W_110	110	-246	51	48	CTTTTGT	TTG	YKL004W
	YKL004W_232	232	-124	42	39	ACACTGA	CTG	YKL004W
	YKL004W_67	67	-289	66	63	CGTATTT	ATT	YKL004W
	YKL005C_12	12	-115	30	27	GCAATGA	ATG	YKL005C
	YKL009W_4	4	-38	38	63	TCACTGT	CTG	YKL009W
	YKL041W_54	54	-40	40	78	AGTTTGG	TTG	YKL041W
	YKL046C_108	108	-125	21	18	GATACGA	ACG	YKL046C
	YKL053C-A_11	11	-75	42	39	TATATGC	ATG	YKL053C-A
	YKL053C-A_42	42	-44	44	54	TGTTTGT	TTG	YKL053C-A
	YKL053C-A_54	54	-32	32	42	AACTTGA	TTG	YKL053C-A
	YKL054C_31	31	-79	57	54	AAAATCA	ATC	YKL054C
	YKL054C_40	40	-70	48	45	ATCATAA	ATA	YKL054C
	YKL054C_63	63	-47	47	45	TTTTTGT	TTG	YKL054C
	YKL054C_96	96	-14	14	12	ATCATCA	ATC	YKL054C
	YKL056C_15	15	-28	28	54	CAGATTA	ATT	YKL056C
	YKL056C_2	2	-41	18	15	N/A	TTG	YKL056C
	YKL064W_57	57	-92	21	18	AAGTTGT	TTG	YKL064W
	YKL080W_22	22	-65	65	102	AAGTTGC	TTG	YKL080W
	YKL080W_28	28	-59	59	96	CAGTTGC	TTG	YKL080W
	YKL096W_25	25	-22	22	66	ACTACGA	ACG	YKL096W
	YKL100C_1	1	-22	22	48	N/A	ATG	YKL100C
	YKL104C_120	120	-82	39	36	TAACTGT	CTG	YKL104C
	YKL104C_138	138	-64	21	18	TATATAG	ATA	YKL104C
	YKL125W_24	24	-59	24	21	ACCACGA	ACG	YKL125W
	YKL126W_155	155	-53	39	36	AAATTGA	TTG	YKL126W
	YKL126W_67	67	-141	24	21	AGAATTG	ATT	YKL126W
	YKL126W_68	68	-140	48	45	GAATTGG	TTG	YKL126W
	YKL140W_218	218	-56	56	72	ACAATTC	ATT	YKL140W
	YKL140W_72	72	-202	42	39	TTATTGA	TTG	YKL140W
	YKL142W_2	2	-56	42	39	N/A	ATA	YKL142W
	YKL164C_58	58	-17	17	36	CTAATAG	ATA	YKL164C
	YKL171W_60	60	-17	17	159	AAAACGG	ACG	YKL171W
	YKL176C_64	64	-282	60	57	TCATTGT	TTG	YKL176C
	YKL181W_130	130	-46	46	51	CATCTGC	CTG	YKL181W
	YKL181W_136	136	-40	40	45	CAGATTC	ATT	YKL181W
	YKL181W_32	32	-144	84	81	AAACTGC	CTG	YKL181W
	YKL183W_43	43	-100	33	30	GGATTGT	TTG	YKL183W
	YKL183W_88	88	-55	42	39	ACAGTGA	GTG	YKL183W
	YKL185W_128	128	-220	186	183	AGCGTGA	GTG	YKL185W
	YKL185W_188	188	-160	126	123	CTATTGG	TTG	YKL185W
	YKL185W_263	263	-85	51	48	CTTATTA	ATT	YKL185W
	YKL190W_26	26	-20	20	57	TAGAAGC	AAG	YKL190W
	YKR002W_25	25	-180	24	21	ATCATAC	ATA	YKR002W
	YKR003W_60	60	-29	18	15	TTATTGA	TTG	YKR003W
	YKR014C_15	15	-128	24	21	CAACTGT	CTG	YKR014C
	YKR026C_80	80	-26	26	57	CCTACGT	ACG	YKR026C
	YKR042W_17	17	-190	27	24	GCAATTT	ATT	YKR042W
	YKR042W_187	187	-20	20	21	TTAATTT	ATT	YKR042W
	YKR042W_4	4	-203	36	33	AAGATTT	ATT	YKR042W
	YKR067W_66	66	-41	41	309	CTAATAA	ATA	YKR067W
	YKR068C_23	23	-25	25	84	TTCATTG	ATT	YKR068C
	YKR080W_13	13	-45	33	30	AAAATTA	ATT	YKR080W
	YKR080W_23	23	-35	35	60	CCTATCA	ATC	YKR080W
	YKR099W_114	114	-143	84	81	TTTCTGA	CTG	YKR099W
	YKR100C_119	119	-232	102	99	CTTATTA	ATT	YKR100C
	YKR100C_173	173	-178	48	45	CGAATAT	ATA	YKR100C
	YLL010C_113	113	-129	27	24	AGTCTGC	CTG	YLL010C
	YLL010C_124	124	-118	21	18	TTCGTGT	GTG	YLL010C
	YLL010C_65	65	-177	75	72	ACGTTGT	TTG	YLL010C
	YLL013C_109	109	-133	48	45	ACATTGA	TTG	YLL013C
	YLL013C_70	70	-172	87	84	CATCTGG	CTG	YLL013C
	YLL018C-A_28	28	-30	18	15	AGTATCT	ATC	YLL018C-A
	YLL019C_470	470	-43	43	69	ATACTGC	CTG	YLL019C
	YLL027W_124	124	-82	54	51	ACCATTT	ATT	YLL027W
	YLL027W_65	65	-141	90	87	AAACTGT	CTG	YLL027W
	YLL039C_19	19	-78	72	69	AGGATAA	ATA	YLL039C
	YLL039C_34	34	-63	57	54	TCTATCT	ATC	YLL039C
	YLL039C_46	46	-51	45	42	AATACGA	ACG	YLL039C
	YLR006C_26	26	-149	147	144	ACATTGT	TTG	YLR006C
	YLR009W_25	25	-115	27	24	GATTTGA	TTG	YLR009W
	YLR016C_4	4	-38	36	33	AGCATGG	ATG	YLR016C
	YLR019W_176	176	-130	78	75	AAGATAT	ATA	YLR019W
	YLR019W_206	206	-100	48	45	CTTTTGA	TTG	YLR019W
	YLR019W_224	224	-82	30	27	TTAATTT	ATT	YLR019W
	YLR019W_254	254	-52	52	129	TGAGTGA	GTG	YLR019W
	YLR023C_64	64	-129	90	87	CAGTTGA	TTG	YLR023C
	YLR023C_82	82	-111	72	69	CACTTGT	TTG	YLR023C
	YLR025W_60	60	-14	14	81	GTATTGA	TTG	YLR025W
	YLR028C_71	71	-82	54	51	AACATTC	ATT	YLR028C
	YLR037C_184	184	-761	207	204	CCTATGA	ATG	YLR037C
	YLR040C_6	6	-58	58	87	CAAGTGA	GTG	YLR040C
	YLR044C_7	7	-23	23	63	AAAATAA	ATA	YLR044C
	YLR073C_76	76	-44	44	45	TACATTT	ATT	YLR073C
	YLR079W_15	15	-25	25	60	CCCTTGA	TTG	YLR079W
	YLR079W_8	8	-32	32	33	ATTTTGA	TTG	YLR079W
	YLR089C_191	191	-113	113	147	ACGTTGC	TTG	YLR089C
	YLR089C_270	270	-34	34	72	AATATAT	ATA	YLR089C
	YLR093C_39	39	-34	34	45	AAGCTGT	CTG	YLR093C
	YLR093C_4	4	-69	42	39	AATTTGA	TTG	YLR093C
	YLR096W_62	62	-136	36	33	AAAATAT	ATA	YLR096W
	YLR097C_50	50	-31	18	15	CACATGT	ATG	YLR097C
	YLR109W_21	21	-16	16	21	CCAATAA	ATA	YLR109W
	YLR120C_1	1	-112	72	69	N/A	ATT	YLR120C
	YLR130C_36	36	-80	80	93	AAGTTGA	TTG	YLR130C
	YLR130C_7	7	-109	27	24	ACCCTGT	CTG	YLR130C
	YLR130C_94	94	-22	22	27	CAAGTGA	GTG	YLR130C
	YLR139C_89	89	-334	66	63	TGGATGC	ATG	YLR139C
	YLR152C_109	109	-60	39	36	ATCAAGG	AAG	YLR152C
	YLR152C_127	127	-42	21	18	TATATGG	ATG	YLR152C
	YLR152C_97	97	-72	51	48	TACATGT	ATG	YLR152C
	YLR167W_10	10	-47	47	69	TACTTGG	TTG	YLR167W
	YLR167W_19	19	-38	38	60	AGAAAGA	AAG	YLR167W
	YLR167W_31	31	-26	26	48	TTAATTT	ATT	YLR167W
	YLR167W_41	41	-16	16	45	ATTTTGC	TTG	YLR167W
	YLR179C_46	46	-31	31	36	CCCATCC	ATC	YLR179C
	YLR181C_42	42	-25	25	30	CTAATTG	ATT	YLR181C
	YLR187W_46	46	-185	36	33	TTAATAT	ATA	YLR187W
	YLR188W_20	20	-53	30	27	TACATGA	ATG	YLR188W
	YLR190W_57	57	-263	24	21	TTACTGC	CTG	YLR190W
	YLR190W_60	60	-260	21	18	CTGCTGT	CTG	YLR190W
	YLR190W_86	86	-234	45	42	GCCTTGG	TTG	YLR190W
	YLR206W_59	59	-38	18	15	ATTTTGA	TTG	YLR206W
	YLR206W_77	77	-20	20	18	TAAGTGT	GTG	YLR206W
	YLR208W_19	19	-71	21	18	CAATTGG	TTG	YLR208W
	YLR208W_32	32	-58	33	30	GCTCTGA	CTG	YLR208W
	YLR208W_61	61	-29	29	39	AAGATAA	ATA	YLR208W
	YLR219W_121	121	-74	72	69	ATATTGA	TTG	YLR219W
	YLR223C_202	202	-118	75	72	AACATAG	ATA	YLR223C
	YLR229C_154	154	-55	55	84	CGAATTA	ATT	YLR229C
	YLR229C_172	172	-37	37	66	CTTATAA	ATA	YLR229C
	YLR229C_184	184	-25	25	54	GAAATAA	ATA	YLR229C
	YLR229C_21	21	-188	126	123	CAGGTGT	GTG	YLR229C
	YLR229C_36	36	-173	111	108	ATACTGA	CTG	YLR229C
	YLR229C_72	72	-137	75	72	GCAATAG	ATA	YLR229C
	YLR242C_63	63	-40	21	18	CGGATGA	ATG	YLR242C
	YLR248W_7	7	-48	24	21	GTATTGT	TTG	YLR248W
	YLR256W_110	110	-185	147	144	AAATTGT	TTG	YLR256W
	YLR256W_116	116	-179	141	138	TATCTGA	CTG	YLR256W
	YLR256W_174	174	-121	75	72	GTTTTGT	TTG	YLR256W
	YLR256W_47	47	-248	48	45	GCTATTG	ATT	YLR256W
	YLR256W_91	91	-204	129	126	GGTTTGA	TTG	YLR256W
	YLR257W_10	10	-194	45	42	TCTTTGA	TTG	YLR257W
	YLR257W_125	125	-79	45	42	TTTATTT	ATT	YLR257W
	YLR257W_138	138	-66	21	18	TACTTGA	TTG	YLR257W
	YLR257W_83	83	-121	87	84	ACATTGG	TTG	YLR257W
	YLR273C_160	160	-58	58	75	TCTATGC	ATG	YLR273C
	YLR277C_69	69	-79	30	27	ACATTGT	TTG	YLR277C
	YLR286C_132	132	-99	39	36	AAAATAA	ATA	YLR286C
	YLR286C_44	44	-187	39	36	TTCATAA	ATA	YLR286C
	YLR286C_50	50	-181	33	30	ACATTGA	TTG	YLR286C
	YLR291C_18	18	-14	14	66	CTTTTGC	TTG	YLR291C
	YLR297W_64	64	-35	18	15	ATTATAG	ATA	YLR297W
	YLR300W_17	17	-81	27	24	TTTACGA	ACG	YLR300W
	YLR300W_36	36	-62	21	18	GTTTTGA	TTG	YLR300W
	YLR300W_61	61	-37	21	18	TTTTTGT	TTG	YLR300W
	YLR304C_19	19	-20	20	84	ACCATTA	ATT	YLR304C
	YLR327C_11	11	-63	45	42	CTAATAA	ATA	YLR327C
	YLR333C_81	81	-387	90	87	CCGATGC	ATG	YLR333C
	YLR340W_19	19	-41	18	15	AACATCC	ATC	YLR340W
	YLR342W_164	164	-93	18	15	CTGATAG	ATA	YLR342W
	YLR342W_177	177	-80	39	36	GACATTA	ATT	YLR342W
	YLR342W_190	190	-67	21	18	CTTACGT	ACG	YLR342W
	YLR342W_229	229	-28	28	36	GAAATCA	ATC	YLR342W
	YLR347C_28	28	-92	63	60	AGAATTA	ATT	YLR347C
	YLR355C_24	24	-55	45	42	CCTATTC	ATT	YLR355C
	YLR359W_63	63	-44	18	15	AAGTTGC	TTG	YLR359W
	YLR372W_100	100	-44	44	45	TTTATTT	ATT	YLR372W
	YLR372W_121	121	-23	23	24	CGTTTGT	TTG	YLR372W
	YLR372W_127	127	-17	17	18	TTTACGA	ACG	YLR372W
	YLR372W_28	28	-116	69	66	TATCTGG	CTG	YLR372W
	YLR372W_54	54	-90	84	81	TGATTGG	TTG	YLR372W
	YLR372W_61	61	-83	36	33	TTTTTGA	TTG	YLR372W
	YLR375W_18	18	-14	14	15	GGCATGT	ATG	YLR375W
	YLR378C_147	147	-58	24	21	AACATAG	ATA	YLR378C
	YLR378C_34	34	-171	96	93	TTCCTGC	CTG	YLR378C
	YLR407W_190	190	-54	45	42	ATTTTGT	TTG	YLR407W
	YLR414C_18	18	-92	36	33	AAGATCA	ATC	YLR414C
	YLR414C_46	46	-64	27	24	AACTTGA	TTG	YLR414C
	YLR430W_192	192	-106	106	123	CTTATCA	ATC	YLR430W
	YLR430W_47	47	-251	78	75	CTTTTGT	TTG	YLR430W
	YLR432W_20	20	-96	45	42	CATCTGT	CTG	YLR432W
	YLR432W_33	33	-83	60	57	TTTATTC	ATT	YLR432W
	YLR432W_76	76	-40	40	51	AATATTA	ATT	YLR432W
	YLR440C_38	38	-31	31	75	GTATTGA	TTG	YLR440C
	YLR447C_20	20	-25	25	48	CGGATCG	ATC	YLR447C
	YLR450W_24	24	-134	57	54	GAGGTGG	GTG	YLR450W
	YLR453C_31	31	-48	36	33	TATATGT	ATG	YLR453C
	YML018C_38	38	-93	30	27	GCATTGT	TTG	YML018C
	YML023C_18	18	-26	24	21	CAAATGG	ATG	YML023C
	YML043C_148	148	-14	14	30	AATATGA	ATG	YML043C
	YML058W_2	2	-20	20	96	N/A	CTG	YML058W
	YML070W_18	18	-26	26	162	TACATTC	ATT	YML070W
	YML071C_21	21	-55	54	51	GAAGTGT	GTG	YML071C
	YML072C_154	154	-16	16	51	GCATTGA	TTG	YML072C
	YML075C_42	42	-36	21	18	TAATTGT	TTG	YML075C
	YML081C-A_40	40	-19	19	48	TAATTGA	TTG	YML081C-A
	YML086C_121	121	-35	35	147	AAAATTA	ATT	YML086C
	YML086C_136	136	-20	20	132	GATATTA	ATT	YML086C
	YML106W_100	100	-205	33	30	ATCATTG	ATT	YML106W
	YML106W_101	101	-204	51	48	TCATTGT	TTG	YML106W
	YML106W_125	125	-180	27	24	TTTTTGA	TTG	YML106W
	YML106W_144	144	-161	30	27	CTTATTA	ATT	YML106W
	YML106W_161	161	-144	93	90	TTTATTT	ATT	YML106W
	YML106W_163	163	-142	33	30	TATTTGT	TTG	YML106W
	YML106W_170	170	-135	84	81	CAAATAA	ATA	YML106W
	YML106W_192	192	-113	72	69	TCCATAA	ATA	YML106W
	YML106W_206	206	-99	48	45	CTTCTGC	CTG	YML106W
	YML106W_230	230	-75	24	21	ATTTTGG	TTG	YML106W
	YML106W_246	246	-59	18	15	ATTGTGT	GTG	YML106W
	YML106W_82	82	-223	51	48	ATTTTGT	TTG	YML106W
	YML128C_41	41	-83	83	84	AGCATGA	ATG	YML128C
	YML130C_35	35	-66	63	60	AAACTGG	CTG	YML130C
	YMR005W_10	10	-53	53	51	AAAGTGC	GTG	YMR005W
	YMR010W_118	118	-147	114	111	ATCCTGA	CTG	YMR010W
	YMR012W_31	31	-68	30	27	AATTTGT	TTG	YMR012W
	YMR012W_74	74	-25	25	48	TATCTGA	CTG	YMR012W
	YMR016C_144	144	-80	80	147	TCTTTGT	TTG	YMR016C
	YMR016C_157	157	-67	67	78	AAATTGA	TTG	YMR016C
	YMR026C_43	43	-73	30	27	TGCATGA	ATG	YMR026C
	YMR031C_48	48	-31	31	57	GCTTTGC	TTG	YMR031C
	YMR031C_54	54	-25	25	51	CATATAG	ATA	YMR031C
	YMR034C_102	102	-106	57	54	TCTATGC	ATG	YMR034C
	YMR034C_109	109	-99	45	42	TACCTGA	CTG	YMR034C
	YMR054W_32	32	-182	18	15	GTGTTGA	TTG	YMR054W
	YMR083W_5	5	-49	42	39	CTTCTGT	CTG	YMR083W
	YMR086W_28	28	-43	43	48	GCCATAC	ATA	YMR086W
	YMR089C_49	49	-150	45	42	CTTTTGG	TTG	YMR089C
	YMR092C_51	51	-31	31	84	TTAACGG	ACG	YMR092C
	YMR097C_22	22	-28	28	51	TGAATGC	ATG	YMR097C
	YMR108W_25	25	-166	99	96	TGTATTG	ATT	YMR108W
	YMR108W_26	26	-165	24	21	GTATTGT	TTG	YMR108W
	YMR120C_12	12	-31	31	69	AGCTTGG	TTG	YMR120C
	YMR120C_18	18	-25	25	63	GACATCA	ATC	YMR120C
	YMR126C_105	105	-84	78	75	ACATTGA	TTG	YMR126C
	YMR136W_39	39	-59	59	165	GAATTGT	TTG	YMR136W
	YMR139W_141	141	-89	36	33	CGTCTGA	CTG	YMR139W
	YMR139W_156	156	-74	21	18	TTACTGG	CTG	YMR139W
	YMR145C_159	159	-44	18	15	ATCATAA	ATA	YMR145C
	YMR148W_170	170	-88	88	273	CTTTTGT	TTG	YMR148W
	YMR166C_124	124	-129	123	120	ACAACGA	ACG	YMR166C
	YMR166C_151	151	-102	96	93	TTCATTA	ATT	YMR166C
	YMR166C_197	197	-56	21	18	AGTATTC	ATT	YMR166C
	YMR176W_67	67	-35	30	27	TGTATGT	ATG	YMR176W
	YMR181C_25	25	-153	126	123	GTATTGC	TTG	YMR181C
	YMR182C_31	31	-82	51	48	TTCTTGA	TTG	YMR182C
	YMR183C_48	48	-29	29	30	AAACTGC	CTG	YMR183C
	YMR189W_31	31	-75	60	57	GTATTGA	TTG	YMR189W
	YMR189W_71	71	-35	35	51	TTTATTG	ATT	YMR189W
	YMR189W_80	80	-26	26	42	AAAACGT	ACG	YMR189W
	YMR190C_118	118	-46	46	66	TTATTGT	TTG	YMR190C
	YMR195W_13	13	-79	45	42	TGTTTGT	TTG	YMR195W
	YMR200W_69	69	-52	24	21	ATTCTGA	CTG	YMR200W
	YMR212C_113	113	-29	29	48	TTCATTT	ATT	YMR212C
	YMR212C_86	86	-56	56	75	ATCATTC	ATT	YMR212C
	YMR216C_104	104	-74	18	15	TAATTGT	TTG	YMR216C
	YMR216C_64	64	-114	18	15	AAACTGA	CTG	YMR216C
	YMR217W_7	7	-52	30	27	CATTTGG	TTG	YMR217W
	YMR223W_133	133	-85	85	123	TTATTGA	TTG	YMR223W
	YMR230W_12	12	-20	20	24	CAGATCA	ATC	YMR230W
	YMR238W_41	41	-93	21	18	ACATTGT	TTG	YMR238W
	YMR238W_75	75	-59	33	30	TTAATTT	ATT	YMR238W
	YMR241W_21	21	-124	42	39	TCATTGT	TTG	YMR241W
	YMR241W_84	84	-61	61	75	ACAATCT	ATC	YMR241W
	YMR243C_25	25	-86	21	18	AATATAA	ATA	YMR243C
	YMR243C_30	30	-81	33	30	AACATTC	ATT	YMR243C
	YMR246W_106	106	-121	24	21	CTTTTGT	TTG	YMR246W
	YMR246W_183	183	-44	21	18	TCTCTGT	CTG	YMR246W
	YMR257C_299	299	-89	89	87	TTCATGT	ATG	YMR257C
	YMR257C_326	326	-62	62	60	ACTTTGA	TTG	YMR257C
	YMR261C_17	17	-69	51	48	TGCAGGT	AGG	YMR261C
	YMR264W_17	17	-29	29	57	TCTACGA	ACG	YMR264W
	YMR291W_26	26	-57	18	15	GCGATAT	ATA	YMR291W
	YMR296C_23	23	-79	33	30	TGCCTGG	CTG	YMR296C
	YMR300C_55	55	-71	66	63	GTCTTGA	TTG	YMR300C
	YMR300C_79	79	-47	42	39	CTAATAA	ATA	YMR300C
	YMR305C_39	39	-98	98	117	GAGCTGA	CTG	YMR305C
	YMR305C_51	51	-86	86	105	CAACTGT	CTG	YMR305C
	YMR305C_93	93	-44	44	63	AAATTGT	TTG	YMR305C
	YMR308C_110	110	-37	27	24	CTAACGA	ACG	YMR308C
	YMR308C_33	33	-114	78	75	CGAGTGG	GTG	YMR308C
	YMR308C_84	84	-63	27	24	GTAATTA	ATT	YMR308C
	YMR309C_27	27	-29	29	66	ACAATAG	ATA	YMR309C
	YMR309C_9	9	-47	47	84	CATATTT	ATT	YMR309C
	YMR315W_11	11	-31	31	81	TTCTTGG	TTG	YMR315W
	YNL007C_100	100	-41	39	36	TACATTC	ATT	YNL007C
	YNL007C_106	106	-35	33	30	CACATCA	ATC	YNL007C
	YNL007C_115	115	-26	24	21	ATAATAG	ATA	YNL007C
	YNL007C_26	26	-115	57	54	GAATTGT	TTG	YNL007C
	YNL016W_15	15	-38	38	216	ATAATAA	ATA	YNL016W
	YNL024C-A_29	29	-25	25	39	AAGTTGC	TTG	YNL024C-A
	YNL027W_40	40	-69	33	30	ACTCTGA	CTG	YNL027W
	YNL032W_28	28	-112	21	18	CAATTGA	TTG	YNL032W
	YNL032W_68	68	-72	66	63	AATTTGC	TTG	YNL032W
	YNL037C_62	62	-43	30	27	CCTATCC	ATC	YNL037C
	YNL055C_19	19	-20	20	69	AAAATCA	ATC	YNL055C
	YNL064C_131	131	-62	24	21	AACATAA	ATA	YNL064C
	YNL064C_134	134	-59	21	18	ATAATTA	ATT	YNL064C
	YNL064C_141	141	-52	39	36	AAAATTA	ATT	YNL064C
	YNL064C_162	162	-31	18	15	TACATCT	ATC	YNL064C
	YNL064C_43	43	-150	96	93	CCCATAT	ATA	YNL064C
	YNL064C_73	73	-120	66	63	TATTTGA	TTG	YNL064C
	YNL064C_80	80	-113	45	42	TAACTGT	CTG	YNL064C
	YNL066W_18	18	-535	132	129	AATATAA	ATA	YNL066W
	YNL066W_21	21	-532	129	126	ATAATCG	ATC	YNL066W
	YNL066W_29	29	-524	288	285	CGTATTA	ATT	YNL066W
	YNL066W_39	39	-514	111	108	ACTATAT	ATA	YNL066W
	YNL066W_5	5	-548	312	309	CACACGT	ACG	YNL066W
	YNL066W_75	75	-478	75	72	AAGATCG	ATC	YNL066W
	YNL068C_24	24	-186	99	96	GAATTGA	TTG	YNL068C
	YNL085W_105	105	-161	63	60	ACATTGG	TTG	YNL085W
	YNL085W_86	86	-180	60	57	ACCTTGA	TTG	YNL085W
	YNL090W_124	124	-35	35	120	GAAACGT	ACG	YNL090W
	YNL090W_134	134	-25	25	30	GCTTTGG	TTG	YNL090W
	YNL091W_104	104	-43	21	18	ACAATAA	ATA	YNL091W
	YNL091W_91	91	-56	30	27	GCCATTA	ATT	YNL091W
	YNL103W_55	55	-101	66	63	CTCCTGA	CTG	YNL103W
	YNL131W_12	12	-35	24	21	AAAACGG	ACG	YNL131W
	YNL134C_7	7	-38	38	63	ACTATAC	ATA	YNL134C
	YNL145W_11	11	-30	18	15	ATCATCT	ATC	YNL145W
	YNL151C_16	16	-34	34	45	AACTTGA	TTG	YNL151C
	YNL154C_170	170	-52	42	39	AACTTGT	TTG	YNL154C
	YNL154C_182	182	-40	30	27	CTACTGA	CTG	YNL154C
	YNL154C_53	53	-169	18	15	GAAATTA	ATT	YNL154C
	YNL156C_1	1	-170	170	225	N/A	TTG	YNL156C
	YNL156C_145	145	-26	26	81	AGTATTT	ATT	YNL156C
	YNL156C_16	16	-155	155	210	CTTATTG	ATT	YNL156C
	YNL156C_4	4	-167	167	222	TTGATGA	ATG	YNL156C
	YNL156C_43	43	-128	128	183	ATAAAGG	AAG	YNL156C
	YNL156C_49	49	-122	122	177	GGCATAG	ATA	YNL156C
	YNL160W_12	12	-43	43	135	AACATCT	ATC	YNL160W
	YNL160W_21	21	-34	34	126	AGGATTA	ATT	YNL160W
	YNL161W_34	34	-106	42	39	ACACTGA	CTG	YNL161W
	YNL164C_146	146	-19	19	39	TTCATGC	ATG	YNL164C
	YNL164C_67	67	-98	48	45	AATTTGT	TTG	YNL164C
	YNL164C_91	91	-74	24	21	ATCGTGC	GTG	YNL164C
	YNL165W_33	33	-44	44	63	AAATTGA	TTG	YNL165W
	YNL176C_115	115	-64	27	24	CCCATCC	ATC	YNL176C
	YNL176C_147	147	-32	32	33	GAAAAGC	AAG	YNL176C
	YNL189W_139	139	-53	48	45	ATTTTGT	TTG	YNL189W
	YNL189W_154	154	-38	33	30	CACTTGA	TTG	YNL189W
	YNL189W_54	54	-138	45	42	CACATCT	ATC	YNL189W
	YNL190W_178	178	-62	62	63	CTTTTGG	TTG	YNL190W
	YNL190W_188	188	-52	45	42	AACATTT	ATT	YNL190W
	YNL191W_29	29	-33	21	18	TGAATGT	ATG	YNL191W
	YNL197C_126	126	-203	75	72	GTCGTGT	GTG	YNL197C
	YNL197C_144	144	-185	57	54	CTTCTGT	CTG	YNL197C
	YNL197C_197	197	-132	66	63	CAACTGA	CTG	YNL197C
	YNL197C_226	226	-103	102	99	TCTTTGT	TTG	YNL197C
	YNL197C_38	38	-291	99	96	CAGTTGT	TTG	YNL197C
	YNL201C_129	129	-132	54	51	GTACTGA	CTG	YNL201C
	YNL201C_159	159	-102	24	21	CTCATTT	ATT	YNL201C
	YNL201C_99	99	-162	84	81	ATACTGA	CTG	YNL201C
	YNL207W_50	50	-75	39	36	TCCTTGG	TTG	YNL207W
	YNL207W_66	66	-59	59	60	CTATTGA	TTG	YNL207W
	YNL211C_28	28	-23	21	18	AATATGT	ATG	YNL211C
	YNL219C_54	54	-92	72	69	TTATTGT	TTG	YNL219C
	YNL238W_38	38	-244	93	90	GTATTGA	TTG	YNL238W
	YNL251C_14	14	-258	174	171	TTATTGT	TTG	YNL251C
	YNL251C_167	167	-105	21	18	TTTTTGT	TTG	YNL251C
	YNL251C_47	47	-225	141	138	ATTATCG	ATC	YNL251C
	YNL251C_53	53	-219	135	132	GTATTGT	TTG	YNL251C
	YNL251C_74	74	-198	114	111	CCAATCA	ATC	YNL251C
	YNL263C_108	108	-35	35	147	TCAATAG	ATA	YNL263C
	YNL263C_42	42	-101	60	57	GAGCTGT	CTG	YNL263C
	YNL283C_130	130	-236	39	36	CTATTGC	TTG	YNL283C
	YNL283C_172	172	-194	102	99	CCTTTGA	TTG	YNL283C
	YNL283C_182	182	-184	63	60	ACCATTA	ATT	YNL283C
	YNL283C_326	326	-40	40	108	TCTTTGA	TTG	YNL283C
	YNL287W_10	10	-179	45	42	GAATTGT	TTG	YNL287W
	YNL287W_29	29	-160	60	57	CCAACGT	ACG	YNL287W
	YNL287W_79	79	-110	39	36	TTCATCC	ATC	YNL287W
	YNL288W_106	106	-35	35	78	ACAACGA	ACG	YNL288W
	YNL288W_37	37	-104	104	147	GTTTTGA	TTG	YNL288W
	YNL288W_73	73	-68	68	111	ATCTTGA	TTG	YNL288W
	YNL289W_24	24	-47	47	93	AAAACGA	ACG	YNL289W
	YNL291C_184	184	-28	28	117	TTTCTGT	CTG	YNL291C
	YNL291C_22	22	-190	111	108	AACGTGT	GTG	YNL291C
	YNL291C_25	25	-187	108	105	GTGTTGT	TTG	YNL291C
	YNL291C_61	61	-151	72	69	CCATTGG	TTG	YNL291C
	YNL294C_111	111	-68	21	18	GTCATTT	ATT	YNL294C
	YNL294C_157	157	-22	22	39	TCGATGA	ATG	YNL294C
	YNL294C_48	48	-131	57	54	AGACTGG	CTG	YNL294C
	YNL307C_114	114	-49	49	93	TCAATTT	ATT	YNL307C
	YNL307C_23	23	-140	135	132	CCATTGT	TTG	YNL307C
	YNL307C_65	65	-98	93	90	TTATTGA	TTG	YNL307C
	YNL307C_68	68	-95	90	87	TTGATAG	ATA	YNL307C
	YNL307C_99	99	-64	64	108	TCTTTGC	TTG	YNL307C
	YNR001C_33	33	-67	45	42	GTAATTA	ATT	YNR001C
	YNR001C_39	39	-61	39	36	ACAATTA	ATT	YNR001C
	YNR001C_4	4	-96	30	27	GGTTTGT	TTG	YNR001C
	YNR012W_32	32	-60	18	15	TATATGC	ATG	YNR012W
	YNR017W_141	141	-34	18	15	AATATAG	ATA	YNR017W
	YNR017W_71	71	-104	45	42	TCTTTGC	TTG	YNR017W
	YNR018W_3	3	-47	47	48	AGCTTGA	TTG	YNR018W
	YNR028W_50	50	-37	37	78	CAATTGA	TTG	YNR028W
	YNR044W_12	12	-105	18	15	ATAATGA	ATG	YNR044W
	YNR051C_110	110	-631	108	105	CCACTGT	CTG	YNR051C
	YNR051C_119	119	-622	99	96	CTATTGT	TTG	YNR051C
	YNR051C_210	210	-531	66	63	TTCATAC	ATA	YNR051C
	YNR051C_219	219	-522	57	54	AATTTGT	TTG	YNR051C
	YNR051C_228	228	-513	48	45	AAAACGA	ACG	YNR051C
	YNR051C_557	557	-184	51	48	AATCTGT	CTG	YNR051C
	YNR051C_560	560	-181	48	45	CTGTTGA	TTG	YNR051C
	YNR055C_197	197	-260	66	63	ATTTTGT	TTG	YNR055C
	YNR055C_242	242	-215	21	18	TTCATGC	ATG	YNR055C
	YNR055C_391	391	-66	48	45	CTAACGA	ACG	YNR055C
	YNR055C_397	397	-60	42	39	AATATAA	ATA	YNR055C
	YNR055C_98	98	-359	87	84	ACGATAA	ATA	YNR055C
	YNR069C_279	279	-198	33	30	AATATGA	ATG	YNR069C
	YOL012C_21	21	-86	42	39	ACACTGC	CTG	YOL012C
	YOL012C_63	63	-44	44	42	TAAATTC	ATT	YOL012C
	YOL016C_73	73	-33	18	15	TCTATCA	ATC	YOL016C
	YOL018C_22	22	-43	43	48	TTGATGT	ATG	YOL018C
	YOL019W_77	77	-65	42	39	ACCATTT	ATT	YOL019W
	YOL028C_94	94	-128	24	21	TCAACGG	ACG	YOL028C
	YOL032W_60	60	-36	18	15	AGATTGA	TTG	YOL032W
	YOL036W_63	63	-330	18	15	ACAGTGT	GTG	YOL036W
	YOL038C-A_38	38	-26	26	24	TTGATGG	ATG	YOL038C-A
	YOL040C_36	36	-16	16	30	AAGATAA	ATA	YOL040C
	YOL043C_51	51	-32	32	30	AAAATGT	ATG	YOL043C
	YOL063C_27	27	-46	21	18	ATCAAGA	AAG	YOL063C
	YOL063C_6	6	-67	42	39	GTAATGA	ATG	YOL063C
	YOL103W_25	25	-139	51	48	AGTACGA	ACG	YOL103W
	YOL105C_110	110	-161	39	36	AACATTT	ATT	YOL105C
	YOL105C_221	221	-50	21	18	TATATGA	ATG	YOL105C
	YOL105C_77	77	-194	72	69	CAATTGC	TTG	YOL105C
	YOL109W_37	37	-19	19	24	ACTACGT	ACG	YOL109W
	YOL111C_24	24	-25	25	63	AGAATAA	ATA	YOL111C
	YOL123W_245	245	-135	90	87	CAATTGG	TTG	YOL123W
	YOL123W_275	275	-105	60	57	TTACTGT	CTG	YOL123W
	YOL123W_297	297	-83	83	84	TTCATAA	ATA	YOL123W
	YOL123W_304	304	-76	21	18	AAGACGC	ACG	YOL123W
	YOL123W_321	321	-59	59	60	TTTATAA	ATA	YOL123W
	YOL123W_79	79	-301	36	33	TAAATTT	ATT	YOL123W
	YOL123W_88	88	-292	27	24	TACGTGT	GTG	YOL123W
	YOL126C_20	20	-56	56	81	AATATAG	ATA	YOL126C
	YOL126C_23	23	-53	53	78	ATAGTGC	GTG	YOL126C
	YOL126C_26	26	-50	50	75	GTGCTGC	CTG	YOL126C
	YOL126C_35	35	-41	41	66	ACTATTA	ATT	YOL126C
	YOL139C_32	32	-48	27	24	TTTACGA	ACG	YOL139C
	YOL158C_42	42	-84	48	45	GAGATGA	ATG	YOL158C
	YOR008C_28	28	-189	27	24	GTATTGA	TTG	YOR008C
	YOR008C_34	34	-183	21	18	ATATTGT	TTG	YOR008C
	YOR014W_150	150	-104	63	60	TACCTGT	CTG	YOR014W
	YOR014W_175	175	-79	79	144	TAACTGG	CTG	YOR014W
	YOR014W_208	208	-46	46	111	CTTATTA	ATT	YOR014W
	YOR034C_13	13	-206	120	117	TGTATGG	ATG	YOR034C
	YOR039W_92	92	-70	39	36	TACTTGA	TTG	YOR039W
	YOR041C_20	20	-1200	48	45	AAAATGT	ATG	YOR041C
	YOR043W_218	218	-174	36	33	TTAGTGA	GTG	YOR043W
	YOR043W_240	240	-152	108	105	AGCATTT	ATT	YOR043W
	YOR043W_262	262	-130	66	63	TAATTGT	TTG	YOR043W
	YOR047C_46	46	-87	51	48	AATATAT	ATA	YOR047C
	YOR065W_34	34	-183	81	78	TAAATAT	ATA	YOR065W
	YOR089C_10	10	-52	24	21	AAGATCG	ATC	YOR089C
	YOR095C_16	16	-54	36	33	TACATAA	ATA	YOR095C
	YOR095C_22	22	-48	30	27	AACTTGG	TTG	YOR095C
	YOR110W_39	39	-44	18	15	TTCATTT	ATT	YOR110W
	YOR116C_116	116	-91	91	111	TCACTGG	CTG	YOR116C
	YOR116C_4	4	-203	96	93	TCGTTGA	TTG	YOR116C
	YOR116C_71	71	-136	136	156	TAGATCA	ATC	YOR116C
	YOR117W_67	67	-26	26	78	AAATTGG	TTG	YOR117W
	YOR124C_57	57	-50	36	33	AAAGTGG	GTG	YOR124C
	YOR124C_63	63	-44	30	27	GTAATTA	ATT	YOR124C
	YOR136W_51	51	-57	45	42	ACCTTGG	TTG	YOR136W
	YOR136W_72	72	-36	24	21	CAGATCG	ATC	YOR136W
	YOR142W_113	113	-80	78	75	GTTCTGT	CTG	YOR142W
	YOR142W_138	138	-55	55	129	TATACGT	ACG	YOR142W
	YOR142W_164	164	-29	27	24	CTTTTGC	TTG	YOR142W
	YOR142W_29	29	-164	48	45	ACACTGC	CTG	YOR142W
	YOR142W_39	39	-154	66	63	TATATAG	ATA	YOR142W
	YOR142W_80	80	-113	111	108	AAGCTGG	CTG	YOR142W
	YOR152C_138	138	-452	96	93	TATATGT	ATG	YOR152C
	YOR152C_267	267	-323	123	120	TTTATGC	ATG	YOR152C
	YOR152C_465	465	-125	39	36	AATTTGA	TTG	YOR152C
	YOR153W_112	112	-55	55	72	GAAATTA	ATT	YOR153W
	YOR153W_137	137	-30	24	21	CGTATCC	ATC	YOR153W
	YOR153W_14	14	-153	69	66	GTCACGC	ACG	YOR153W
	YOR153W_2	2	-165	81	78	N/A	AAG	YOR153W
	YOR153W_41	41	-126	42	39	ACTGTGT	GTG	YOR153W
	YOR157C_36	36	-29	27	24	AACCTGA	CTG	YOR157C
	YOR161C_91	91	-31	31	42	ATAGTGA	GTG	YOR161C
	YOR180C_13	13	-488	27	24	ACCATGG	ATG	YOR180C
	YOR184W_55	55	-38	38	126	TAGTTGA	TTG	YOR184W
	YOR194C_34	34	-35	35	75	CAAATCA	ATC	YOR194C
	YOR196C_1	1	-23	23	21	N/A	AGG	YOR196C
	YOR209C_51	51	-100	66	63	TTTTTGT	TTG	YOR209C
	YOR216C_7	7	-52	51	48	CTTGTGT	GTG	YOR216C
	YOR228C_107	107	-113	42	39	AAGTTGG	TTG	YOR228C
	YOR230W_4	4	-47	24	21	ATCTTGA	TTG	YOR230W
	YOR245C_163	163	-65	65	87	TCCATTT	ATT	YOR245C
	YOR246C_1	1	-62	62	66	N/A	ATG	YOR246C
	YOR246C_13	13	-50	50	54	GGCCTGA	CTG	YOR246C
	YOR246C_40	40	-23	23	27	AGTACGA	ACG	YOR246C
	YOR247W_104	104	-129	72	69	GCCATAG	ATA	YOR247W
	YOR247W_178	178	-55	27	24	AAAATCA	ATC	YOR247W
	YOR261C_11	11	-82	30	27	ACGTTGG	TTG	YOR261C
	YOR270C_39	39	-132	33	30	TACTTGC	TTG	YOR270C
	YOR273C_49	49	-35	35	33	AGCATAG	ATA	YOR273C
	YOR298C-A_22	22	-22	22	27	TTAACGA	ACG	YOR298C-A
	YOR307C_62	62	-110	39	36	TATATGC	ATG	YOR307C
	YOR307C_72	72	-100	54	51	TATATGC	ATG	YOR307C
	YOR316C_83	83	-68	66	63	ACTTTGC	TTG	YOR316C
	YOR335C_48	48	-58	51	48	CGGATTA	ATT	YOR335C
	YOR341W_87	87	-38	38	93	TTTTTGC	TTG	YOR341W
	YOR346W_110	110	-53	53	75	GAGTTGA	TTG	YOR346W
	YOR346W_52	52	-111	27	24	GACCTGG	CTG	YOR346W
	YOR363C_16	16	-49	49	84	CGGATGA	ATG	YOR363C
	YOR370C_143	143	-197	27	24	AAAATTT	ATT	YOR370C
	YOR370C_293	293	-47	47	51	TCTATAA	ATA	YOR370C
	YPL008W_83	83	-145	42	39	TTGATGA	ATG	YPL008W
	YPL020C_59	59	-71	69	66	AAAATTA	ATT	YPL020C
	YPL023C_112	112	-19	19	90	AGGTTGA	TTG	YPL023C
	YPL023C_66	66	-65	63	60	ATTTTGT	TTG	YPL023C
	YPL023C_88	88	-43	43	114	TTTTTGA	TTG	YPL023C
	YPL023C_98	98	-33	18	15	GTGTTGG	TTG	YPL023C
	YPL028W_48	48	-16	16	135	CAGATTA	ATT	YPL028W
	YPL032C_133	133	-65	33	30	AGTCTGA	CTG	YPL032C
	YPL034W_33	33	-301	63	60	ATTATGA	ATG	YPL034W
	YPL037C_12	12	-19	19	27	CAGACGC	ACG	YPL037C
	YPL048W_13	13	-23	23	93	AAGATCA	ATC	YPL048W
	YPL050C_67	67	-128	114	111	CTCTTGG	TTG	YPL050C
	YPL053C_39	39	-33	27	24	CTTTTGT	TTG	YPL053C
	YPL067C_3	3	-54	39	36	AGCATGC	ATG	YPL067C
	YPL071C_30	30	-16	16	39	TAAATGA	ATG	YPL071C
	YPL087W_3	3	-48	30	27	ATCATAG	ATA	YPL087W
	YPL089C_116	116	-137	137	201	AAGCTGG	CTG	YPL089C
	YPL090C_9	9	-20	20	21	AGAGTGA	GTG	YPL090C
	YPL096C-A_20	20	-22	18	15	TACATGA	ATG	YPL096C-A
	YPL125W_120	120	-39	33	30	CAACTGT	CTG	YPL125W
	YPL125W_27	27	-132	48	45	CAATTGG	TTG	YPL125W
	YPL133C_12	12	-118	60	57	GGGATGG	ATG	YPL133C
	YPL133C_34	34	-96	33	30	CTTATGA	ATG	YPL133C
	YPL135W_50	50	-41	41	39	CAATTGA	TTG	YPL135W
	YPL141C_135	135	-111	96	93	ACAATAA	ATA	YPL141C
	YPL141C_144	144	-102	87	84	GCTATTT	ATT	YPL141C
	YPL145C_121	121	-132	114	111	ACATTGG	TTG	YPL145C
	YPL145C_140	140	-113	33	30	TATTTGT	TTG	YPL145C
	YPL145C_146	146	-107	27	24	TTCACGC	ACG	YPL145C
	YPL145C_169	169	-84	66	63	AGTCTGA	CTG	YPL145C
	YPL146C_17	17	-19	19	30	TTAATGA	ATG	YPL146C
	YPL148C_121	121	-16	16	45	GCTTTGA	TTG	YPL148C
	YPL148C_93	93	-44	44	42	CTAATGA	ATG	YPL148C
	YPL154C_234	234	-29	29	39	CAAATAA	ATA	YPL154C
	YPL154C_33	33	-230	48	45	TTCATTC	ATT	YPL154C
	YPL177C_11	11	-71	71	72	CCAGTGC	GTG	YPL177C
	YPL177C_17	17	-65	65	66	CTACTGA	CTG	YPL177C
	YPL177C_47	47	-35	35	36	TTTATGC	ATG	YPL177C
	YPL179W_141	141	-28	28	54	ATATTGT	TTG	YPL179W
	YPL179W_47	47	-122	122	123	ATCTTGT	TTG	YPL179W
	YPL179W_83	83	-86	86	87	AGCTTGT	TTG	YPL179W
	YPL184C_118	118	-554	78	75	GCTATAT	ATA	YPL184C
	YPL184C_124	124	-548	72	69	TCTACGA	ACG	YPL184C
	YPL184C_207	207	-465	30	27	TCTCTGT	CTG	YPL184C
	YPL184C_23	23	-649	36	33	GCAATCA	ATC	YPL184C
	YPL184C_249	249	-423	84	81	TCTCTGT	CTG	YPL184C
	YPL184C_295	295	-377	90	87	ACATTGT	TTG	YPL184C
	YPL184C_329	329	-343	21	18	TATTTGA	TTG	YPL184C
	YPL184C_355	355	-317	30	27	CTTCTGA	CTG	YPL184C
	YPL184C_364	364	-308	21	18	CACCTGT	CTG	YPL184C
	YPL184C_369	369	-303	93	90	GTTCTGC	CTG	YPL184C
	YPL184C_467	467	-205	205	219	AATATCC	ATC	YPL184C
	YPL190C_38	38	-56	56	141	TAATTGA	TTG	YPL190C
	YPL203W_43	43	-119	93	90	CTGATTA	ATT	YPL203W
	YPL207W_37	37	-40	21	18	CATTTGA	TTG	YPL207W
	YPL214C_51	51	-56	27	24	ACCATGG	ATG	YPL214C
	YPL214C_60	60	-47	18	15	CTCAAGA	AAG	YPL214C
	YPL243W_56	56	-34	34	69	ATATTGA	TTG	YPL243W
	YPL246C_8	8	-32	32	33	ACTCTGG	CTG	YPL246C
	YPL250C_41	41	-26	26	183	ACAATAA	ATA	YPL250C
	YPL252C_7	7	-37	37	72	GAAATAG	ATA	YPL252C
	YPL254W_8	8	-216	138	135	GAAATTG	ATT	YPL254W
	YPL256C_125	125	-50	50	231	CAAAAGA	AAG	YPL256C
	YPL256C_47	47	-128	128	309	CAAATTT	ATT	YPL256C
	YPL256C_58	58	-117	102	99	CTTATAT	ATA	YPL256C
	YPL256C_68	68	-107	107	288	GCATTGC	TTG	YPL256C
	YPL256C_94	94	-81	66	63	TTCATTC	ATT	YPL256C
	YPL260W_25	25	-71	27	24	TAAATCT	ATC	YPL260W
	YPL273W_35	35	-38	38	54	GAAATCA	ATC	YPL273W
	YPL273W_51	51	-22	22	57	TAAATCG	ATC	YPL273W
	YPR010C_19	19	-38	38	39	AGAATAT	ATA	YPR010C
	YPR010C_22	22	-35	35	36	ATATTGA	TTG	YPR010C
	YPR016C_21	21	-71	71	69	AGTATAA	ATA	YPR016C
	YPR016C_24	24	-68	68	66	ATAATTA	ATT	YPR016C
	YPR019W_20	20	-56	56	219	GTTATTT	ATT	YPR019W
	YPR020W_3	3	-46	36	33	AAGATAA	ATA	YPR020W
	YPR024W_125	125	-50	50	51	GCAATTT	ATT	YPR024W
	YPR024W_135	135	-40	18	15	ATTATAA	ATA	YPR024W
	YPR036W-A_32	32	-43	43	69	TTACTGA	CTG	YPR036W-A
	YPR053C_55	55	-1129	27	24	ACATTGA	TTG	YPR053C
	YPR065W_16	16	-56	56	57	ATTATTC	ATT	YPR065W
	YPR073C_12	12	-50	21	18	CCTGTGA	GTG	YPR073C
	YPR085C_43	43	-44	39	36	GTGATGT	ATG	YPR085C
	YPR105C_7	7	-66	27	24	TCGTTGG	TTG	YPR105C
	YPR109W_90	90	-120	72	69	CTCTTGA	TTG	YPR109W
	YPR119W_113	113	-236	18	15	CTACTGC	CTG	YPR119W
	YPR119W_185	185	-164	30	27	CTTTTGT	TTG	YPR119W
	YPR119W_95	95	-254	36	33	CCAGTGT	GTG	YPR119W
	YPR120C_64	64	-47	47	93	GTAACGC	ACG	YPR120C
	YPR123C_78	78	-1027	96	93	AGTCTGT	CTG	YPR123C
	YPR124W_40	40	-137	18	15	TCCATAG	ATA	YPR124W
	YPR124W_50	50	-127	45	42	TATTTGC	TTG	YPR124W
	YPR125W_26	26	-70	21	18	GAATTGA	TTG	YPR125W
	YPR133W-A_1	1	-28	18	15	N/A	TTG	YPR133W-A
	YPR138C_104	104	-126	66	63	TCTTTGA	TTG	YPR138C
	YPR138C_44	44	-186	126	123	AGGTTGT	TTG	YPR138C
	YPR138C_59	59	-171	111	108	AGTCTGA	CTG	YPR138C
	YPR145W_3	3	-39	33	30	AACTTGC	TTG	YPR145W
	YPR149W_138	138	-26	26	24	AGCATAC	ATA	YPR149W
	YPR149W_20	20	-144	51	48	AAAAGGT	AGG	YPR149W
	YPR149W_36	36	-128	27	24	TTAATTT	ATT	YPR149W
	YPR149W_64	64	-100	39	36	AAAAGGA	AGG	YPR149W
	YPR149W_71	71	-93	75	72	TAAATAA	ATA	YPR149W
	YPR149W_92	92	-72	54	51	AACATCT	ATC	YPR149W
	YPR149W_99	99	-65	18	15	TCAATAA	ATA	YPR149W
	YPR156C_246	246	-48	21	18	TTCATTA	ATT	YPR156C
	YPR156C_32	32	-262	135	132	AACCTGT	CTG	YPR156C
	YPR156C_44	44	-250	123	120	AAAGTGA	GTG	YPR156C
	YPR159W_159	159	-29	29	27	AGAATAG	ATA	YPR159W
	YPR159W_50	50	-138	54	51	CTAGTGT	GTG	YPR159W
	YPR160W_276	276	-82	51	48	CAAAAGA	AAG	YPR160W
	YPR160W_298	298	-60	51	48	TTTTTGA	TTG	YPR160W
	YPR161C_24	24	-53	53	54	AAATTGT	TTG	YPR161C
	YPR161C_48	48	-29	29	30	TTCGTGG	GTG	YPR161C
	YPR163C_45	45	-41	18	15	CATCTGT	CTG	YPR163C
	YPR165W_134	134	-63	39	36	TCGCTGT	CTG	YPR165W
	YPR165W_159	159	-38	38	78	CTAATAG	ATA	YPR165W
	YPR181C_23	23	-37	37	51	TATCTGT	CTG	YPR181C
	YPR191W_17	17	-43	43	57	AGGACGG	ACG	YPR191W

## Sheet: Sheet 2
	uORF name	mrna30 (log2)	mrna20 (log2)	ribo30 (log2)	ribo20 (log2)	te30 (log2)	te20 (log2)
	YFR031C-A_8	10.79	9.951	4.6	4.5	-6.18218	-5.48673
	YPL090C_9	11.01	10.236	5.2	5	-5.8215	-5.18717
	YGL008C_217	13.02	12.862	7.3	7.6	-5.73795	-5.31133
	YLR044C_7	14.26	14.037	8.6	7.8	-5.70507	-6.28533
	YAL005C_24	12.52	12.308	7.3	6.5	-5.24138	-5.84425
	YAL005C_17	12.52	12.308	7.4	6.9	-5.08087	-5.3849
	YAL005C_40	12.52	12.308	7.5	7	-5.03092	-5.25943
	YMR092C_51	7.51	7.34	2.6	5.5	-4.89692	-1.87656
	YLR342W_164	11.22	11.284	6.4	6.2	-4.79975	-5.11965
	YMR120C_18	9.4	10.821	4.6	6.1	-4.76364	-4.75869
	YGR157W_92	9.32	9.149	4.6	4.8	-4.70869	-4.36316
	YDR293C_701	8.27	8.37	3.6	4	-4.65715	-4.32134
	YGR240C_211	10.66	10.594	6.1	6.6	-4.59314	-3.96057
	YFL018C_57	7.77	7.963	3.2	4.8	-4.58165	-3.17761
	YMR120C_12	9.4	10.821	5	6.4	-4.44049	-4.43776
	YDL191W_3	9.74	8.999	5.3	5	-4.42699	-3.94995
	YGR148C_115	8.94	8.158	4.6	4	-4.33284	-4.10885
	YGR192C_16	14.13	14.298	9.8	9.7	-4.33074	-4.61422
	YLR342W_190	11.22	11.284	7	7.6	-4.2495	-3.69085
	YJR009C_16	12.94	13.663	8.8	10.3	-4.14098	-3.40437
	YDL185W_33	10.84	10.924	6.8	6.6	-4.06592	-4.37254
	YLR304C_19	10.25	10.641	6.2	7.4	-4.05672	-3.2706
	YOR136W_72	7.84	8.219	3.9	6.4	-3.91054	-1.84883
	YDR293C_614	8.27	8.37	4.4	2.5	-3.8497	-5.90609
	YMR012W_74	9.46	9.309	5.7	6.3	-3.76589	-3.03759
	YLR291C_18	6.32	5.762	2.6	-1.3	-3.71474	-7.06233
	YLR342W_177	11.22	11.284	7.5	8.1	-3.67644	-3.14779
	YJL041W_17	7.6	7.067	3.9	4.5	-3.66842	-2.60338
	YLR378C_147	8.24	8.252	4.6	5.9	-3.62901	-2.32892
	YJL138C_13	10.73	10.348	7.1	6.3	-3.60092	-4.07738
	YMR108W_26	8.37	7.772	4.8	5.9	-3.59637	-1.84856
	YNL176C_147	5.16	5.067	1.6	4	-3.55085	-1.01804
	YKL056C_2	10.31	9.678	6.8	4.5	-3.53563	-5.21416
	YNL287W_79	8.59	8.546	5.1	6.2	-3.52078	-2.38167
	YGL008C_4	13.02	12.862	9.5	9.5	-3.51275	-3.40354
	YDR293C_602	8.27	8.37	4.8	4.5	-3.48693	-3.90612
	YCR012W_12	13.36	13.57	9.9	9.6	-3.46279	-3.92754
	YGR240C_78	10.66	10.594	7.2	6.7	-3.43655	-3.88266
	YEL027W_7	8.91	8.766	5.5	5.6	-3.39584	-3.13219
	YGR178C_188	7.59	7.189	4.2	4	-3.39488	-3.14025
	YJL002C_25	7.57	7.648	4.2	4.8	-3.37245	-2.86245
	YJL002C_42	7.57	7.648	4.2	4.8	-3.37245	-2.86245
	YAR015W_70	7.57	8.855	4.2	6.9	-3.35541	-1.93504
	YGR240C_49	10.66	10.594	7.3	6.4	-3.35138	-4.22363
	YDR172W_6	7.95	7.41	4.6	3.5	-3.34316	-3.94596
	YFL004W_19	7.52	7.513	4.2	4.5	-3.33031	-3.0497
	YIL053W_11	8.97	8.911	5.7	5.9	-3.27612	-2.98745
	YLR167W_41	11.51	10.743	8.3	7	-3.26429	-3.75569
	YMR300C_79	7.84	8.797	4.6	5	-3.22614	-3.75076
	YPL048W_13	8.91	8.653	5.7	4.5	-3.21787	-4.18867
	YGR034W_13	9.4	8.736	6.2	5.9	-3.21081	-2.81299
	YGR240C_151	10.66	10.594	7.5	7.4	-3.19385	-3.22342
	YPR159W_159	7.95	7.86	4.8	5.8	-3.17192	-2.07434
	YIL069C_14	9.09	8.356	5.9	4	-3.16334	-4.30667
	YHR020W_4	9.08	8.415	5.9	5.6	-3.1461	-2.78106
	YGL206C_87	10.02	10.036	6.9	6.6	-3.12206	-3.40184
	YPR181C_23	8.63	8.299	5.5	5.5	-3.11219	-2.83483
	YDL055C_104	10.27	10.123	7.2	7.4	-3.07864	-2.70518
	YGR086C_67	8.93	8.73	5.9	6.2	-3.07846	-2.56623
	YDR293C_292	8.27	8.37	5.2	4.8	-3.07252	-3.58421
	YBR196C_22	11.31	11.343	8.3	7.5	-3.0422	-3.83522
	YLR167W_31	11.51	10.743	8.5	7.2	-3.0325	-3.52361
	YML070W_18	7.62	7.658	4.6	3.5	-3.01442	-4.19464
	YDL192W_2	8.74	8.68	5.8	6.4	-2.96278	-2.30956
	YML072C_154	9.43	9.268	6.5	6.9	-2.96175	-2.34513
	YPL154C_234	8.89	9.823	5.9	7.7	-2.95661	-2.0738
	YFR050C_37	6.55	6.558	3.6	4.8	-2.94684	-1.77212
	YLR333C_81	8.52	7.379	5.6	4.8	-2.91645	-2.59343
	YOR153W_41	10.01	11.055	7.1	8.7	-2.91359	-2.36197
	YHR068W_13	7.66	7.46	4.8	5.8	-2.88074	-1.67406
	YLR257W_10	6.47	6.129	3.6	5.5	-2.86225	-0.66533
	YMR246W_106	8.04	7.588	5.2	4	-2.85117	-3.53894
	YBR218C_1	8.85	9.241	6	6.6	-2.84744	-2.60739
	YLR248W_7	6.78	7.099	3.9	2.5	-2.8466	-4.63487
	YIL069C_8	9.09	8.356	6.3	4	-2.78457	-4.30673
	YEL009C_322	8.46	8.631	5.7	6.5	-2.7592	-2.16685
	YLR167W_19	11.51	10.743	8.8	7.5	-2.75475	-3.27879
	YDL137W_22	7.5	7.681	4.8	4.5	-2.72279	-3.21741
	YLR028C_71	7.79	7.65	5.1	4.8	-2.72037	-2.86418
	YBL056W_2	7.13	7.45	4.4	5.3	-2.71934	-2.17876
	YGR034W_1	9.4	8.736	6.7	6.2	-2.70826	-2.57213
	YFL018C_53	7.77	7.963	5.1	4.8	-2.70747	-3.17762
	YDL126C_13	10.1	10.27	7.4	7.4	-2.68806	-2.84356
	YGL206C_81	10.02	10.036	7.4	7.4	-2.62602	-2.61759
	YCR011C_82	7.4	7.606	4.8	4.5	-2.62152	-3.14257
	YMR189W_80	8.62	9.556	6	7.7	-2.60762	-1.88195
	YLR256W_47	8.37	8.655	5.8	6.4	-2.59615	-2.28427
	YDL078C_28	6.53	6.746	3.9	5	-2.59513	-1.69727
	YBR127C_18	9.76	9.807	7.2	7	-2.59228	-2.7581
	YIL052C_15	9.01	8.248	6.4	3.5	-2.59032	-4.784
	YNR001C_39	7.65	7.749	5.1	4.8	-2.58013	-2.96334
	YGR240C_31	10.66	10.594	8.1	7.9	-2.57587	-2.67133
	YOR153W_14	10.01	11.055	7.4	8.8	-2.57223	-2.28716
	YBR196C_4	11.31	11.343	8.7	8.1	-2.56147	-3.23549
	YGR240C_141	10.66	10.594	8.1	8.2	-2.55961	-2.40251
	YJL052W_14	11.62	12.406	9.1	10.9	-2.55517	-1.50778
	YLR130C_7	7.16	6.399	4.6	3.5	-2.55388	-2.93531
	YLR342W_229	11.22	11.284	8.7	8.7	-2.55171	-2.57235
	YOR153W_2	10.01	11.055	7.5	8.8	-2.54725	-2.26907
	YOR273C_49	6.43	6.64	3.9	5.3	-2.50421	-1.36903
	YOR370C_293	6.7	6.514	4.2	3.5	-2.50179	-3.04981
	YCL030C_9	8.87	9.403	6.4	6.6	-2.50013	-2.76725
	YPL028W_48	8.41	8.086	5.9	6.3	-2.48388	-1.81459
	YOR153W_137	10.01	11.055	7.5	8.3	-2.47396	-2.75153
	YHR155W_8	6.08	5.981	3.6	-1.3	-2.46782	-7.28207
	YCR088W_18	8.07	7.986	5.6	5.5	-2.46016	-2.52208
	YFR009W_30	7.65	7.172	5.2	4.8	-2.46015	-2.38595
	YJL005W_81	7.94	7.864	5.5	3.5	-2.42828	-4.40062
	YGL207W_82	8.27	8.113	5.9	5.6	-2.4151	-2.4795
	YGL123W_77	10.93	10.299	8.5	8	-2.41487	-2.312
	YGR253C_38	6.83	6.743	4.4	2.5	-2.41132	-4.27941
	YKL104C_138	8.25	8.202	5.9	6	-2.39509	-2.15297
	YOR014W_208	7	7.037	4.6	5	-2.39174	-1.98801
	YKL056C_15	10.31	9.678	7.9	7.6	-2.38446	-2.0845
	YDR516C_20	6.79	6.947	4.4	5.8	-2.37695	-1.1614
	YBL022C_96	7.78	7.754	5.4	4	-2.36762	-3.70502
	YGR138C_176	6.77	6.7	4.4	5.3	-2.35026	-1.42823
	YLR340W_19	11.49	10.746	9.2	8	-2.304	-2.69711
	YGR240C_126	10.66	10.594	8.4	8.4	-2.29683	-2.22357
	YPR019W_20	6.21	5.932	3.9	4	-2.28083	-1.88327
	YGR178C_160	7.59	7.189	5.3	4	-2.27945	-3.14023
	YKL054C_96	7.96	7.71	5.7	6.3	-2.26888	-1.4391
	YMR012W_31	9.46	9.309	7.2	7.1	-2.2688	-2.20109
	YLR300W_17	9.04	9.31	6.8	7	-2.26009	-2.32236
	YGL190C_366	5.85	6.008	3.6	4	-2.23935	-1.95943
	YBR283C_52	7.92	7.891	5.7	2.5	-2.22304	-5.42697
	YMR217W_7	8.73	8.001	6.5	5.9	-2.21206	-2.07744
	YEL063C_105	6.13	6.538	3.9	5.5	-2.20267	-1.07455
	YHR018C_8	7.13	6.89	4.9	5.5	-2.20178	-1.42561
	YGR240C_114	10.66	10.594	8.5	8.4	-2.1938	-2.19968
	YER110C_34	9.32	8.368	7.1	6.5	-2.18881	-1.90439
	YAL026C_55	7.24	7.416	5.1	5.9	-2.17401	-1.49223
	YDR234W_11	6.35	6.185	4.2	4.8	-2.15968	-1.39907
	YMR300C_55	7.84	8.797	5.7	6.9	-2.13064	-1.87377
	YLR256W_174	8.37	8.655	6.3	6.2	-2.12224	-2.49085
	YNL055C_19	9.21	8.652	7.1	7.2	-2.10823	-1.48832
	YGL028C_9	6.7	6.473	4.6	4	-2.08788	-2.42399
	YBL022C_72	7.78	7.754	5.7	5	-2.08783	-2.70506
	YMR031C_54	7	7.008	4.9	5	-2.0732	-1.95951
	YGR178C_104	7.59	7.189	5.5	4	-2.07274	-3.13998
	YLR432W_20	9.07	9.149	7	5.9	-2.06892	-3.22598
	YDR225W_11	8.26	8.22	6.2	6	-2.06559	-2.17101
	YNL154C_182	6.64	6.562	4.6	4.8	-2.03196	-1.77639
	YBR069C_48	7.22	7.13	5.2	4.5	-2.02677	-2.6667
	YLR167W_10	11.51	10.743	9.5	8.2	-2.02118	-2.52431
	YGL009C_51	9.08	8.373	7.1	4.8	-2.01822	-3.58687
	YER110C_72	9.32	8.369	7.3	6.5	-2.01042	-1.90524
	YLR120C_1	6.42	6.909	4.4	4.5	-2.00937	-2.44464
	YPR160W_298	7.79	8.876	5.8	7.6	-2.00722	-1.28185
	YJL165C_9	5.93	5.986	3.9	5.3	-2.00419	-0.71513
	YLR447C_20	8	8.137	6	4.5	-1.99981	-3.67305
	YGR229C_3	6.61	6.73	4.6	4	-1.99927	-2.68171
	YLR109W_21	10.71	10.296	8.7	8.6	-1.98443	-1.72586
	YGR281W_89	7.17	7.766	5.2	5.5	-1.97785	-2.30189
	YHR115C_136	5.57	5.025	3.6	5.3	-1.96518	0.247494
	YGL207W_60	8.27	8.113	6.3	5.3	-1.96224	-2.84215
	YGR054W_75	7.15	6.775	5.2	4.5	-1.95611	-2.31089
	YDL122W_93	6.37	6.323	4.4	4.5	-1.95292	-1.85953
	YBL047C_115	8.46	8.375	6.5	7.1	-1.94867	-1.2671
	YGL049C_76	6.55	6.609	4.6	5.6	-1.94514	-0.975159
	YLR300W_61	9.04	9.31	7.1	8.3	-1.93846	-1.03851
	YCR088W_14	8.07	7.986	6.1	6.2	-1.93663	-1.82159
	YHR206W_464	5.54	5.445	3.6	3.5	-1.93027	-1.98139
	YMR309C_27	8.39	8.235	6.5	5.8	-1.92502	-2.44907
	YGL123W_63	10.93	10.299	9	7.7	-1.92384	-2.55425
	YOR370C_143	6.7	6.513	4.8	5.8	-1.9167	-0.728123
	YBR078W_58	10.4	10.433	8.5	7.9	-1.90714	-2.50982
	YLR300W_36	9.04	9.31	7.1	7.6	-1.90627	-1.71676
	YGL077C_140	7.6	7.585	5.7	6.6	-1.90474	-0.951343
	YMR291W_26	6.07	6.71	4.2	5.8	-1.88126	-0.925264
	YHR190W_18	7.29	7.409	5.4	4.5	-1.87289	-2.94511
	YNR001C_33	7.65	7.749	5.8	5.8	-1.8698	-1.96287
	YGR281W_82	7.17	7.766	5.3	5.8	-1.86232	-1.97995
	YNL154C_170	6.64	6.562	4.8	5.3	-1.8621	-1.29101
	YNL068C_24	5.47	4.895	3.6	5	-1.8609	0.153923
	YJR045C_77	10.45	10.594	8.6	9.5	-1.85956	-1.14124
	YCL037C_41	7.72	6.863	5.9	5.5	-1.85888	-1.39929
	YPR160W_276	7.79	8.876	5.9	7.9	-1.85714	-0.951159
	YDR293C_279	8.27	8.37	6.4	6.6	-1.85027	-1.73655
	YMR246W_183	8.04	7.588	6.2	5.6	-1.84982	-1.95334
	YEL034W_34	10.2	9.542	8.4	7.9	-1.84354	-1.65098
	YER056C_68	7.52	7.357	5.7	4	-1.82092	-3.3084
	YLR450W_24	6.89	7.349	5.1	3.5	-1.81813	-3.88554
	YGL203C_39	6.21	6.169	4.4	4.5	-1.79301	-1.70507
	YKL100C_1	6.4	6.745	4.6	4	-1.79145	-2.69635
	YDL224C_106	5.98	6.018	4.2	4.5	-1.79088	-1.5539
	YPR010C_22	8.94	8.283	7.2	5.5	-1.78045	-2.81928
	YPR145W_3	8.43	8.611	6.7	5.9	-1.77521	-2.68725
	YEL009C_179	8.46	8.63	6.7	7.7	-1.76079	-0.917359
	YLR179C_46	7.37	7.49	5.6	4.5	-1.75857	-3.02637
	YLR372W_127	7.53	7.343	5.8	5.6	-1.75281	-1.70886
	YPR010C_19	8.94	8.283	7.2	5.5	-1.75022	-2.81928
	YOR341W_87	9.39	9.036	7.7	7.8	-1.74079	-1.21389
	YLR355C_24	10.17	9.801	8.4	8.5	-1.74022	-1.29295
	YHR205W_330	6.66	6.519	4.9	5.5	-1.73381	-1.05505
	YNL291C_184	5.66	5.717	3.9	5	-1.72778	-0.668251
	YGL167C_320	7.73	7.97	6	5.6	-1.72464	-2.33606
	YOL126C_35	5.32	5.041	3.6	3.5	-1.71616	-1.5776
	YGR180C_5	8.57	8.656	6.9	6.9	-1.71582	-1.79975
	YMR031C_48	7	7.008	5.3	5.6	-1.69452	-1.37428
	YGL022W_43	8.42	8.354	6.7	6.8	-1.67749	-1.56792
	YHR030C_175	5.86	5.916	4.2	4.5	-1.6662	-1.45192
	YDR033W_93	10.06	10.221	8.4	8.4	-1.65797	-1.80145
	YBR086C_122	8.02	8.182	6.4	6.4	-1.65619	-1.8115
	YDR502C_22	8.26	7.786	6.6	5.5	-1.64932	-2.32209
	YHR143W_236	6.96	6.656	5.3	4.8	-1.6486	-1.87019
	YDL160C_185	7.64	7.507	6	6.3	-1.64089	-1.23537
	YGR054W_148	7.15	6.775	5.5	5.3	-1.63439	-1.50349
	YGL202W_51	8.36	8.098	6.7	6.4	-1.62095	-1.72682
	YFL039C_40	11.03	11.132	9.4	9.4	-1.60817	-1.76001
	YBR039W_49	7.01	6.905	5.4	5.3	-1.59657	-1.63325
	YOR117W_67	6.9	7.079	5.3	5.9	-1.5942	-1.15571
	YLL013C_109	7	7.065	5.4	4.5	-1.58332	-2.60111
	YNL154C_53	6.64	6.562	5.1	5	-1.57223	-1.51353
	YDL224C_330	5.98	6.018	4.4	5.3	-1.5685	-0.746677
	YOR116C_4	7.81	7.457	6.3	5.8	-1.56007	-1.67115
	YBR263W_10	8.16	7.529	6.6	6.3	-1.54954	-1.25809
	YMR261C_17	7.8	7.818	6.2	6.2	-1.54939	-1.65357
	YPL125W_27	6.32	6.279	4.8	3.5	-1.54261	-2.81475
	YDL234C_35	5.14	5.145	3.6	3.5	-1.53459	-1.68115
	YBR069C_39	7.22	7.13	5.7	5.8	-1.52498	-1.345
	YNL134C_7	7.71	8.152	6.2	6.9	-1.52231	-1.29499
	YNR001C_4	7.65	7.75	6.1	6	-1.51598	-1.70021
	YDL132W_73	6.7	6.643	5.2	5.3	-1.50519	-1.37185
	YFR050C_18	6.55	6.558	5.1	5.6	-1.48705	-0.924041
	YJR045C_85	10.45	10.594	9	9.3	-1.47969	-1.33547
	YGL009C_33	9.08	8.373	7.6	5.3	-1.47742	-3.10159
	YFL018C_36	7.77	7.963	6.3	5.8	-1.46623	-2.17775
	YDL055C_91	10.27	10.123	8.8	9.4	-1.46622	-0.741322
	YPL273W_51	6.77	6.245	5.3	5.6	-1.4589	-0.61137
	YHR007C_43	8.51	8.562	7.1	7.3	-1.44243	-1.24001
	YDL122W_84	6.37	6.323	4.9	4.8	-1.43848	-1.5377
	YKL104C_120	8.25	8.202	6.8	7.2	-1.43423	-1.03763
	YJR143C_30	8.29	8.14	6.9	6.9	-1.43146	-1.28458
	YKL142W_2	6.36	6.689	4.9	4	-1.42639	-2.64019
	YEL036C_85	6.2	5.953	4.8	4	-1.42533	-1.90433
	YEL036C_125	6.2	5.953	4.8	5.5	-1.42462	-0.489458
	YOL139C_32	7.73	7.463	6.3	5.9	-1.42395	-1.54017
	YNL294C_111	5.02	5.213	3.6	5	-1.41176	-0.164382
	YDR343C_22	8.27	8.187	6.9	5.6	-1.41075	-2.55468
	YHR007C_40	8.51	8.562	7.1	7.4	-1.41013	-1.1438
	YGL077C_133	7.6	7.585	6.2	6.7	-1.407	-0.873239
	YKL096W_25	7.59	7.171	6.2	7.1	-1.40271	-0.067054
	YFL005W_5	6.46	6.577	5.1	5.5	-1.39712	-1.11328
	YGR281W_189	7.17	7.766	5.8	6.2	-1.39317	-1.60128
	YLR430W_47	7.52	7.379	6.1	4	-1.38504	-3.33051
	YNL016W_15	8.35	8.135	7	7.2	-1.3834	-0.916384
	YPR105C_7	5.99	5.812	4.6	2.5	-1.3814	-3.34834
	YDL224C_59	5.98	6.018	4.6	2.5	-1.37582	-3.55401
	YGL040C_34	6.57	6.587	5.2	6.2	-1.37447	-0.422532
	YDR072C_92	5.56	6.56	4.2	6.5	-1.36403	-0.096714
	YDR502C_13	8.26	7.786	6.9	5.5	-1.3636	-2.3221
	YAL049C_29	5.55	5.581	4.2	5.6	-1.35894	0.052961
	YML075C_42	6.76	6.82	5.4	4.8	-1.34615	-2.03457
	YDL055C_71	10.27	10.123	8.9	8.7	-1.34207	-1.46917
	YMR230W_12	7.99	7.252	6.7	6.5	-1.34169	-0.788369
	YCR002C_23	6.12	5.968	4.8	3.5	-1.33671	-2.5039
	YNL287W_10	8.59	8.546	7.3	5.9	-1.33661	-2.62279
	YDR382W_58	9.22	8.39	7.9	7.4	-1.32613	-0.971697
	YMR305C_93	8.06	8.081	6.7	7	-1.3215	-1.03259
	YMR243C_25	7.5	7.392	6.2	5.8	-1.30927	-1.60632
	YBR133C_94	6.38	6.441	5.1	2.5	-1.30786	-3.97683
	YGR191W_162	6.61	6.36	5.3	4.8	-1.3016	-1.57473
	YGR229C_253	6.61	6.73	5.3	6.3	-1.29923	-0.459439
	YDR226W_7	8.71	8.616	7.4	6.6	-1.29816	-1.98268
	YOR335C_48	9.31	8.669	8	7.5	-1.29287	-1.20547
	YMR183C_48	6.49	6.352	5.2	6.2	-1.29234	-0.187455
	YDL055C_68	10.27	10.123	9	8.8	-1.28903	-1.31915
	YOR184W_55	8.03	8.651	6.7	6.6	-1.28873	-2.09788
	YGL030W_38	9.64	8.923	8.3	8	-1.28829	-0.904608
	YPR149W_64	8.32	8.306	7	6.7	-1.28667	-1.59421
	YMR054W_32	6.98	6.989	5.7	2.5	-1.28646	-4.52548
	YBR221C_88	8.25	8.298	7	7.6	-1.28293	-0.664109
	YDR505C_135	6.59	6.76	5.3	4.8	-1.27755	-1.97449
	YDR505C_191	6.59	6.76	5.3	-1.3	-1.27753	-8.06089
	YMR216C_64	6.69	6.67	5.4	5.8	-1.27448	-0.88422
	YBL045C_56	7.13	6.946	5.9	4	-1.27302	-2.89727
	YDR293C_152	8.27	8.37	7	6.7	-1.264	-1.65789
	YOR124C_63	7.26	7.296	6	6.4	-1.26207	-0.925708
	YMR309C_9	8.39	8.235	7.1	5.9	-1.26148	-2.31112
	YKR026C_80	5.19	4.991	3.9	5.5	-1.26108	0.473083
	YPR165W_159	7.26	7.375	6	6.6	-1.25708	-0.824005
	YCR030C_66	6.56	6.431	5.3	4.5	-1.25221	-1.96717
	YGL009C_23	9.08	8.373	7.8	5.6	-1.24924	-2.73902
	YLR190W_86	6.54	6.43	5.3	5.6	-1.23333	-0.79663
	YLR375W_18	5.65	5.649	4.4	-1.3	-1.23035	-6.94979
	YDL160C_144	7.64	7.506	6.4	6.2	-1.22638	-1.34245
	YGR178C_68	7.59	7.189	6.4	5.9	-1.22509	-1.26548
	YMR086W_28	6.15	6.206	4.9	4	-1.2209	-2.15713
	YOR270C_39	9.33	9.41	8.1	8.2	-1.21557	-1.21828
	YLR347C_28	7.95	7.268	6.7	6	-1.21175	-1.21948
	YDR434W_75	5.8	5.881	4.6	3.5	-1.19576	-2.41709
	YMR136W_39	5.39	5.227	4.2	2.5	-1.19177	-2.76301
	YBR276C_35	6.23	6.415	5	3.5	-1.19134	-2.96172
	YOR316C_83	5.38	5.734	4.2	5.8	-1.18845	0.051001
	YBR049C_62	6.25	6.079	5.1	4.5	-1.18725	-1.61469
	YDR368W_28	6.96	6.961	5.8	5.9	-1.1829	-1.03859
	YJL167W_31	8.1	8.036	6.9	6.8	-1.168	-1.24984
	YDR251W_52	6.58	6.858	5.4	5.5	-1.16255	-1.39437
	YKR080W_23	7.38	7.438	6.2	6.2	-1.16173	-1.26973
	YMR212C_113	6.23	6.075	5.1	5	-1.15976	-1.02653
	YLR359W_63	8.46	10.095	7.3	7.9	-1.15558	-2.20609
	YBR221C_85	8.25	8.298	7.1	7.7	-1.14887	-0.624576
	YPL037C_12	8.84	8.504	7.7	7	-1.14109	-1.51611
	YPR024W_135	7.13	6.685	6	3.5	-1.1285	-3.22155
	YPR149W_36	8.32	8.306	7.2	7	-1.12843	-1.31828
	YDL160C_244	7.64	7.507	6.5	5.6	-1.12635	-1.87306
	YOR261C_11	6.89	6.952	5.8	5.3	-1.11589	-1.68103
	YNL091W_104	6.89	6.752	5.8	5.5	-1.11143	-1.2884
	YJL174W_98	6.63	6.67	5.5	4.8	-1.11072	-1.8846
	YPL260W_25	6.3	6.521	5.2	4.5	-1.10628	-2.05675
	YPR161C_48	5.51	5.321	4.4	4	-1.09888	-1.27234
	YGR090W_101	7.41	7.242	6.3	7.2	-1.09787	-0.023564
	YKL126W_155	6.79	6.891	5.7	5.3	-1.09679	-1.62006
	YEL009C_292	8.46	8.63	7.4	7.9	-1.09111	-0.773439
	YNL283C_326	5.69	5.753	4.6	5	-1.08307	-0.705014
	YFL018C_29	7.77	7.963	6.7	6.2	-1.07921	-1.7992
	YHR098C_34	7.64	7.398	6.6	6.4	-1.0744	-1.02719
	YLL019C_470	5.85	5.964	4.8	5.8	-1.06994	-0.178572
	YEL050C_16	5.49	5.383	4.4	4.5	-1.06989	-0.918828
	YMR308C_84	8.23	7.836	7.2	6.6	-1.06382	-1.20211
	YBR049C_110	6.25	6.079	5.2	5.6	-1.06227	-0.445586
	YDR206W_40	6.25	6.188	5.2	3.5	-1.05269	-2.72461
	YML128C_41	6.12	7.402	5.1	5.8	-1.05073	-1.61854
	YNL287W_29	8.59	8.546	7.5	7	-1.04942	-1.49721
	YPR156C_246	7.05	7.135	6	6.2	-1.04901	-0.97089
	YOL040C_36	9.92	9.199	8.9	9.8	-1.039	0.569998
	YHR165C_31	8	7.951	7	7	-1.03828	-0.964158
	YGL049C_29	6.55	6.609	5.5	6	-1.03818	-0.559849
	YLR130C_94	7.16	6.399	6.1	5.8	-1.03008	-0.613132
	YDL171C_81	9.94	10.679	8.9	10.5	-1.0292	-0.165057
	YGL202W_95	8.36	8.098	7.3	6.8	-1.02209	-1.31171
	YGL009C_17	9.08	8.373	8.1	5.6	-1.01861	-2.73905
	YGR054W_28	7.15	6.775	6.1	5.9	-1.01767	-0.85155
	YJL158C_2	8.98	8.841	8	7.8	-1.01452	-1.01899
	YDR293C_557	8.27	8.369	7.3	7.9	-1.01162	-0.479288
	YLR286C_50	8.97	8.756	8	7.6	-1.00277	-1.12231
	YLR187W_46	5.42	5.143	4.4	4	-1.00253	-1.09346
	YKR080W_13	7.38	7.438	6.4	6.1	-0.99066	-1.38639
	YKL046C_108	6.4	6.577	5.4	5.6	-0.98149	-0.943445
	YDR505C_167	6.59	6.76	5.6	4	-0.9778	-2.71186
	YBL047C_68	8.46	8.374	7.5	7.9	-0.97207	-0.518868
	YPL023C_112	5.9	5.992	4.9	4	-0.96719	-1.94351
	YLR208W_61	7.1	7.006	6.1	7.5	-0.96578	0.458007
	YLR208W_19	7.1	7.006	6.1	5.8	-0.9655	-1.22012
	YEL009C_140	8.46	8.631	7.5	8	-0.96494	-0.581962
	YER118C_155	5.16	4.771	4.2	4	-0.96477	-0.722429
	YPL053C_39	6.03	6.207	5.1	5.9	-0.96429	-0.283665
	YBR085C-A_7	6.03	4.998	5.1	4.5	-0.96054	-0.534123
	YFR053C_31	8.98	9.443	8	9.1	-0.9589	-0.335934
	YOL158C_42	6.15	5.706	5.2	4.5	-0.9566	-1.2419
	YLR286C_44	8.97	8.756	8	7.6	-0.93385	-1.12233
	YHR030C_107	5.86	5.916	4.9	5.9	-0.92937	0.007501
	YHR183W_30	9.6	9.631	8.7	8.5	-0.92458	-1.16874
	YDR169C_208	4.85	4.852	3.9	6.4	-0.92195	1.51873
	YPR163C_45	8.11	7.699	7.2	6.2	-0.91869	-1.53455
	YAR014C_21	6.11	5.746	5.2	2.5	-0.91444	-3.28273
	YER056C_13	7.52	7.357	6.6	6.8	-0.90975	-0.571933
	YER056C_56	7.52	7.357	6.6	4	-0.90919	-3.3084
	YGR086C_50	8.93	8.73	8	7.5	-0.90027	-1.22238
	YGR054W_127	7.15	6.775	6.3	5.9	-0.89751	-0.851527
	YCR053W_9	8.56	8.165	7.7	5.5	-0.8893	-2.70085
	YFR053C_74	8.98	9.443	8.1	9.2	-0.88622	-0.266221
	YDR251W_133	6.58	6.858	5.7	5.5	-0.88341	-1.39458
	YHR183W_27	9.6	9.631	8.7	8.5	-0.88172	-1.1461
	YBR164C_68	5.66	5.603	4.8	5.5	-0.88065	-0.138895
	YDR293C_546	8.27	8.37	7.4	8.2	-0.87458	-0.151346
	YKL126W_67	6.79	6.891	5.9	6	-0.86224	-0.842511
	YER107C_139	5.28	5.219	4.4	5.8	-0.86038	0.566696
	YGL049C_125	6.55	6.609	5.7	5.6	-0.85762	-0.975052
	YBL047C_85	8.46	8.375	7.6	8	-0.85508	-0.387526
	YEL009C_162	8.46	8.63	7.6	8.4	-0.84828	-0.259657
	YPR149W_99	8.32	8.306	7.5	7.7	-0.83113	-0.594587
	YNL197C_226	5.9	5.927	5.1	5.5	-0.8306	-0.462741
	YNL294C_157	5.02	5.213	4.2	4	-0.82715	-1.16429
	YHL020C_30	5.6	5.515	4.8	3.5	-0.81905	-2.05087
	YMR308C_110	8.23	7.836	7.4	7.6	-0.81072	-0.202052
	YNR018W_3	5.87	5.855	5.1	5.6	-0.80694	-0.220953
	YHR205W_68	6.66	6.519	5.9	7.3	-0.8062	0.752263
	YDR164C_22	5.22	5.338	4.4	2.5	-0.80364	-2.87458
	YDR284C_103	5.21	5.991	4.4	6	-0.79769	0.057531
	YBR086C_110	8.02	8.182	7.2	7.3	-0.79612	-0.911104
	YNL263C_108	5.72	5.639	4.9	4.5	-0.79533	-1.17568
	YLR372W_121	7.53	7.343	6.7	6.3	-0.79349	-1.07153
	YGL035C_106	5.2	5.072	4.4	5.6	-0.78488	0.56133
	YMR264W_17	5.39	4.705	4.6	3.5	-0.78022	-1.24148
	YBR149W_16	7.18	7.679	6.4	7	-0.76925	-0.692016
	YDR225W_25	8.26	8.22	7.5	7.6	-0.76811	-0.58591
	YLR432W_76	9.07	9.149	8.3	8.9	-0.76074	-0.25965
	YNR044W_12	5.34	6.512	4.6	3.5	-0.73558	-3.04918
	YOR153W_112	10.01	11.055	9.3	10.2	-0.73504	-0.84136
	YHR161C_11	5.66	5.606	4.9	2.5	-0.73177	-3.14216
	YER165W_34	9.86	9.592	9.1	8.9	-0.72795	-0.651594
	YMR243C_30	7.5	7.392	6.8	5.3	-0.72406	-2.12094
	YHR183W_22	9.6	9.631	8.9	8.6	-0.71525	-0.999522
	YBR158W_217	7.08	6.879	6.4	6.3	-0.71263	-0.607335
	YKL171W_60	4.89	4.785	4.2	2.5	-0.69428	-2.32131
	YGL167C_17	7.73	7.97	7	6.7	-0.69053	-1.25814
	YMR216C_104	6.69	6.67	6	6.8	-0.68944	0.115796
	YDL155W_102	5.3	5.109	4.6	5.5	-0.68834	0.35504
	YBL057C_3	4.61	4.179	3.9	4	-0.68264	-0.129993
	YNL289W_24	5.1	5.387	4.4	5.3	-0.68214	-0.115704
	YPR119W_185	6.09	6.308	5.4	6.7	-0.67966	0.404001
	YOR298C-A_22	8.14	7.796	7.5	6.4	-0.67859	-1.42626
	YGR229C_193	6.61	6.73	5.9	6	-0.67799	-0.681591
	YLR079W_15	5.09	5.012	4.4	5	-0.6754	0.036981
	YAL017W_44	6.98	7.338	6.3	7.2	-0.67429	-0.173321
	YHL020C_27	5.6	5.515	4.9	3.5	-0.66686	-2.05084
	YDR162C_96	3.27	3.069	2.6	4.8	-0.66314	1.71661
	YGL167C_88	7.73	7.97	7.1	6.3	-0.65755	-1.69846
	YHR007C_96	8.51	8.562	7.9	7.3	-0.65628	-1.23952
	YGL190C_260	5.85	6.008	5.2	6	-0.65453	0.040521
	YGL190C_358	5.85	6.008	5.2	5.6	-0.65422	-0.374535
	YOL123W_304	7.26	7.683	6.6	7	-0.65105	-0.634441
	YPL145C_146	6.9	6.821	6.3	4.5	-0.65096	-2.35668
	YNL189W_154	7.68	7.289	7	6.9	-0.64067	-0.365839
	YNL131W_12	6.15	6.289	5.5	5	-0.63869	-1.24038
	YDR214W_25	6.89	5.805	6.3	5.6	-0.6356	-0.170375
	YPR191W_17	6.88	6.733	6.3	6.3	-0.63283	-0.46148
	YGL094C_165	6.41	6.461	5.8	5.6	-0.63277	-0.827385
	YDR293C_437	8.27	8.369	7.6	7.8	-0.63198	-0.583922
	YLR432W_33	9.07	9.149	8.4	8.7	-0.62844	-0.400333
	YPL125W_120	6.32	6.278	5.7	4.8	-0.62555	-1.49263
	YDL131W_1	7.52	7.284	6.9	6.2	-0.62497	-1.12031
	YDR298C_106	6.48	6.279	5.9	5.6	-0.62399	-0.645386
	YHR131C_47	5.23	5.5	4.6	5.3	-0.6217	-0.228568
	YDR481C_22	6.4	6.504	5.8	5.6	-0.62073	-0.870422
	YEL063C_84	6.13	6.538	5.5	6.3	-0.61771	-0.266879
	YKL181W_136	7.58	7.179	7	6.6	-0.61617	-0.628036
	YBL045C_90	7.13	6.946	6.5	5.9	-0.61415	-1.02301
	YHL034C_20	7.5	7.938	6.9	6.9	-0.61118	-1.01534
	YOR124C_57	7.26	7.296	6.7	7	-0.60983	-0.309202
	YDR303C_189	6.12	5.993	5.5	5.3	-0.60668	-0.722014
	YHR084W_232	5.67	5.757	5.1	5	-0.6038	-0.707756
	YDR062W_52	7.15	7.231	6.6	6.3	-0.5883	-0.95981
	YLR430W_192	7.52	7.379	6.9	7	-0.58656	-0.39186
	YDL081C_16	9.34	8.638	8.8	7.8	-0.58573	-0.851761
	YNL091W_91	6.89	6.752	6.3	5.9	-0.58107	-0.82891
	YPR119W_113	6.09	6.307	5.5	6.2	-0.58022	-0.143415
	YDR372C_182	6.19	6.441	5.6	5.6	-0.57968	-0.807833
	YHL034C_17	7.5	7.938	6.9	7	-0.57472	-0.951159
	YIL038C_221	6.27	5.914	5.7	5.8	-0.57091	-0.1291
	YBR006W_53	4.5	5.01	3.9	5.5	-0.56821	0.453855
	YDL132W_198	6.7	6.644	6.1	4.8	-0.5656	-1.85776
	YBR014C_80	4.75	4.876	4.2	-1.3	-0.55805	-6.17624
	YNR012W_32	4.73	4.095	4.2	5	-0.54284	0.954432
	YGR191W_140	6.61	6.36	6.1	5.9	-0.54265	-0.437335
	YOR161C_91	6.15	5.873	5.6	5.6	-0.53742	-0.238445
	YPR053C_55	5.6	5.814	5.1	5.3	-0.53558	-0.543111
	YPL184C_207	7.05	7.306	6.5	8.1	-0.53155	0.830217
	YLR440C_38	5.45	5.348	4.9	2.5	-0.52361	-2.88388
	YPL135W_50	5.13	4.995	4.6	5.3	-0.52271	0.27662
	YAL040C_198	6.12	6.253	5.6	5.8	-0.51668	-0.467527
	YPL273W_35	6.77	6.245	6.3	5.8	-0.51587	-0.459379
	YGL019W_33	5.81	5.508	5.3	5	-0.50552	-0.459194
	YOR157C_36	6.57	6.56	6.1	6.7	-0.50202	0.151176
	YLR414C_46	5.57	5.46	5.1	4.5	-0.49982	-0.996109
	YKR042W_187	9.71	9.457	9.2	9	-0.49671	-0.453531
	YNL007C_26	7.38	7.081	6.9	5.5	-0.49147	-1.61832
	YMR238W_41	6.1	6.324	5.6	5	-0.49111	-1.2747
	YGR189C_36	7.87	7.738	7.4	7.6	-0.48639	-0.104924
	YGL049C_119	6.55	6.609	6.1	5.9	-0.48573	-0.685639
	YDL015C_37	6.85	6.836	6.4	6.2	-0.48401	-0.671096
	YDR394W_58	6.67	6.689	6.2	6.9	-0.48034	0.234165
	YJL162C_23	3.67	3.493	3.2	3.5	-0.47948	-0.029677
	YBR067C_7	8.02	7.784	7.5	7.4	-0.47767	-0.413395
	YBL045C_106	7.13	6.946	6.7	5.5	-0.47675	-1.48236
	YEL023C_173	3.67	3.712	3.2	5.6	-0.47391	1.92184
	YGL167C_70	7.73	7.97	7.3	6.5	-0.47299	-1.5059
	YOR043W_218	5.78	6.042	5.3	6	-0.47056	0.006849
	YHR206W_350	5.54	5.445	5.1	4.8	-0.47025	-0.659453
	YNL064C_134	8.25	7.674	7.8	6.6	-0.46899	-1.04083
	YIL002C_64	5.53	5.507	5.1	6.4	-0.46658	0.863496
	YLL039C_46	8.3	8.38	7.8	8.6	-0.46375	0.232993
	YDL160C_237	7.64	7.507	7.2	5.8	-0.44839	-1.721
	YGR245C_59	6.3	5.8	5.9	4.8	-0.44714	-1.01387
	YGL167C_155	7.73	7.97	7.3	7.3	-0.44408	-0.647663
	YOL036W_63	6.14	6.009	5.7	6.4	-0.44099	0.36177
	YPL184C_364	7.05	7.306	6.6	7	-0.43861	-0.318389
	YPL154C_33	8.89	9.824	8.4	9.6	-0.43722	-0.244157
	YGR119C_43	6.13	5.942	5.7	4.5	-0.43463	-1.4778
	YBR221C_49	8.25	8.298	7.8	7.5	-0.43118	-0.834265
	YGL049C_110	6.55	6.609	6.1	6.6	-0.42168	0.024749
	YNL027W_40	5.03	4.993	4.6	5	-0.41924	0.055982
	YGR218W_159	8.27	8.289	7.9	7.7	-0.41702	-0.576505
	YER148W_167	6.11	6.042	5.7	5.6	-0.41555	-0.408907
	YDR293C_519	8.27	8.37	7.9	8.6	-0.40856	0.201916
	YMR308C_33	8.23	7.836	7.8	7.3	-0.4084	-0.564573
	YDL188C_145	6.53	6.641	6.1	6	-0.40134	-0.592256
	YFL039C_97	11.03	11.132	10.6	11.1	-0.39586	-0.066847
	YDR395W_75	7.49	6.959	7.1	6.8	-0.39274	-0.172915
	YNL064C_131	8.25	7.674	7.9	6.6	-0.39097	-1.04083
	YLL039C_34	8.3	8.38	7.9	8.7	-0.38846	0.273045
	YGR188C_27	4	3.755	3.6	3.5	-0.38785	-0.291251
	YML106W_246	7.35	7.029	7	6.7	-0.38383	-0.316905
	YPL023C_98	5.9	5.992	5.5	2.5	-0.38141	-3.52817
	YEL002C_7	7.2	7.286	6.8	5.5	-0.37975	-1.82209
	YKL125W_24	4.99	4.914	4.6	4	-0.37852	-0.865284
	YJL174W_88	6.63	6.67	6.3	5.6	-0.37348	-1.03625
	YPL256C_125	6.5	6.62	6.1	6.4	-0.37297	-0.248693
	YLL039C_19	8.3	8.38	7.9	8.7	-0.3705	0.350281
	YDR346C_76	7.06	6.975	6.7	7.6	-0.36721	0.617334
	YJL128C_141	5.88	5.833	5.5	5.6	-0.36623	-0.199179
	YMR083W_5	8.53	8.48	8.2	7.2	-0.36451	-1.26198
	YDR072C_76	5.56	6.561	5.2	7.2	-0.36412	0.658244
	YDL089W_256	4.55	4.88	4.2	3.5	-0.35822	-1.41629
	YGR191W_189	6.61	6.36	6.3	5	-0.35805	-1.31171
	YPL207W_37	6.42	5.976	6.1	5.9	-0.35753	-0.053579
	YHR104W_42	6.71	6.294	6.4	6.4	-0.35081	0.07673
	YOR116C_116	7.81	7.457	7.5	7	-0.34653	-0.407788
	YGL022W_31	8.42	8.354	8.1	7.9	-0.33046	-0.430657
	YKL009W_4	5.39	5.093	5.1	4.8	-0.32995	-0.306716
	YER089C_276	7.02	6.9	6.7	6.2	-0.32486	-0.736179
	YPR161C_24	5.51	5.321	5.2	4	-0.32134	-1.27239
	YPR124W_40	7.93	6.241	7.6	6.2	-0.31955	-0.073568
	YPR124W_50	7.93	6.239	7.6	5.9	-0.31805	-0.314579
	YBR029C_53	6.57	6.253	6.3	5.8	-0.31681	-0.467331
	YBR015C_66	7.19	6.899	6.9	4.5	-0.29917	-2.43463
	YGR229C_241	6.61	6.731	6.3	6.8	-0.2986	0.054937
	YBR078W_123	10.4	10.433	10.1	10.7	-0.2954	0.311761
	YGR054W_86	7.15	6.775	6.9	7.6	-0.29332	0.776652
	YGR054W_89	7.15	6.775	6.9	7.6	-0.29332	0.776652
	YJL176C_8	5.9	5.845	5.6	5.6	-0.29331	-0.210988
	YDR310C_110	6.54	6.104	6.3	6.2	-0.28585	0.060885
	YHR039C_8	6.98	6.998	6.7	5.8	-0.28555	-1.21257
	YDR284C_75	5.21	5.992	4.9	5.5	-0.28339	-0.527443
	YNL307C_114	6.8	7.09	6.5	7.7	-0.28285	0.583238
	YBR086C_229	8.02	8.182	7.7	8.4	-0.28156	0.258554
	YOR245C_163	4.47	4.571	4.2	5.5	-0.2787	0.892975
	YOL111C_24	4.88	4.512	4.6	4.8	-0.2764	0.274145
	YGR024C_30	4.88	5.046	4.6	3.5	-0.26911	-1.58217
	YKL054C_63	7.96	7.71	7.7	7.8	-0.26911	0.110899
	YDL190C_46	6.68	6.795	6.4	6.4	-0.26635	-0.42438
	YGL123W_47	10.93	10.299	10.7	9.8	-0.26031	-0.478256
	YDR349C_43	5.87	6.029	5.6	5	-0.25983	-0.980631
	YLR414C_18	5.57	5.46	5.3	4.5	-0.25828	-0.996065
	YLR256W_116	8.37	8.655	8.1	8.2	-0.25727	-0.490638
	YKL080W_28	8.25	8.304	8	7.9	-0.2533	-0.380691
	YGR138C_171	6.77	6.699	6.5	6.6	-0.25102	-0.065434
	YHR007C_63	8.51	8.561	8.3	8	-0.24955	-0.604991
	YKL004W_110	6.5	6.105	6.3	6.3	-0.2486	0.167237
	YNL064C_162	8.25	7.674	8	7.4	-0.24546	-0.303783
	YDL072C_41	6.31	6.522	6.1	6.4	-0.23909	-0.151507
	YGR245C_32	6.3	5.8	6.1	4.8	-0.2367	-1.01379
	YNL190W_188	8.07	8.248	7.8	7.9	-0.23117	-0.357544
	YBR214W_36	5.75	6.158	5.5	4.5	-0.23073	-1.69433
	YER118C_146	5.16	4.771	4.9	4.5	-0.22774	-0.307816
	YOR230W_4	8.55	8.838	8.3	7.7	-0.22549	-1.12634
	YPL243W_56	6.42	6.473	6.2	5.5	-0.22346	-1.00899
	YDL134C_337	6.58	6.761	6.4	7.7	-0.21897	0.987497
	YLR181C_42	4.4	4.194	4.2	4.8	-0.20708	0.592021
	YDR077W_14	10.02	10.291	9.8	10.8	-0.20341	0.485458
	YAL053W_72	6.81	6.925	6.6	6.3	-0.2033	-0.653626
	YCL037C_20	7.72	6.863	7.5	6.7	-0.20062	-0.150553
	YPR024W_125	7.13	6.686	6.9	5.5	-0.19966	-1.22251
	YER094C_58	6.56	6.678	6.4	6	-0.19506	-0.630157
	YDL132W_60	6.7	6.644	6.5	7.4	-0.18327	0.727226
	YHL011C_45	6.43	6.054	6.2	4.5	-0.18273	-1.59033
	YBR060C_13	4.6	4.475	4.4	4	-0.18148	-0.426757
	YJL101C_70	5.49	6.44	5.3	4.5	-0.17969	-1.97647
	YLR190W_60	6.54	6.43	6.4	6	-0.17907	-0.381593
	YDL160C_114	7.64	7.506	7.5	7.5	-0.17635	0.001645
	YNL160W_21	8.81	8.689	8.6	8.5	-0.17635	-0.20255
	YOR008C_34	5.59	5.606	5.4	5.5	-0.17267	-0.142206
	YJL094C_22	5.36	5.397	5.2	4.8	-0.17153	-0.611284
	YPL087W_3	5.36	5.904	5.2	6.7	-0.16884	0.807918
	YER089C_134	7.02	6.9	6.9	7.2	-0.16505	0.263996
	YIL033C_23	6.62	6.732	6.5	7	-0.15259	0.316998
	YDR208W_55	6.15	6.128	6	5.8	-0.15117	-0.341961
	YHR205W_235	6.66	6.519	6.5	5.5	-0.1475	-1.05514
	YKL054C_40	7.96	7.71	7.8	7.5	-0.14721	-0.246597
	YGR157W_201	9.32	9.149	9.2	9.4	-0.14656	0.233511
	YDR284C_88	5.21	5.992	5.1	6.2	-0.14599	0.172196
	YDR284C_178	5.21	5.991	5.1	5.8	-0.14503	-0.205
	YHR135C_87	6.4	6.317	6.3	6	-0.14349	-0.267929
	YKL126W_68	6.79	6.891	6.7	6.6	-0.13969	-0.340146
	YKL080W_22	8.25	8.304	8.1	8	-0.13797	-0.255194
	YLR089C_270	6.06	6.048	5.9	6	-0.13494	0.001057
	YOL126C_20	5.32	5.041	5.2	3.5	-0.13146	-1.57716
	YOL126C_23	5.32	5.041	5.2	3.5	-0.13146	-1.57716
	YOL126C_26	5.32	5.041	5.2	3.5	-0.13146	-1.57716
	YNL007C_115	7.38	7.085	7.3	6.5	-0.12956	-0.620499
	YLR190W_57	6.54	6.43	6.4	6	-0.12673	-0.381549
	YMR189W_71	8.62	9.556	8.5	9.1	-0.12644	-0.476115
	YBR067C_34	8.02	7.785	7.9	7.8	-0.12455	0.036484
	YLR223C_202	5.64	5.639	5.5	6.6	-0.12005	0.99454
	YDR303C_139	6.12	5.991	6	4.5	-0.11931	-1.5273
	YER136W_36	7.12	7.29	7	6.5	-0.11789	-0.826182
	YDL045C_16	4.05	4.515	3.9	3.5	-0.1156	-1.05097
	YDR251W_255	6.58	6.858	6.5	7.2	-0.11161	0.360015
	YNL160W_12	8.81	8.689	8.7	8.6	-0.11136	-0.095603
	YHR159W_33	4.04	4.064	3.9	4.8	-0.10872	0.721881
	YMR315W_11	7.07	7.288	7	7.1	-0.10481	-0.180479
	YLL013C_70	7	7.065	6.9	6.9	-0.10447	-0.208815
	YHR162W_65	6.96	7.019	6.9	6.9	-0.09978	-0.162275
	YML106W_144	7.35	7.029	7.3	6.9	-0.09742	-0.10548
	YPR120C_64	4.02	3.916	3.9	5.3	-0.0919	1.35522
	YKL181W_130	7.58	7.179	7.5	7	-0.09071	-0.130573
	YKL054C_31	7.96	7.71	7.9	7.5	-0.07144	-0.246524
	YDR293C_114	8.27	8.369	8.2	8.9	-0.0706	0.487266
	YDL134C_313	6.58	6.761	6.5	7.8	-0.06701	1.05965
	YPL146C_17	4.67	4.348	4.6	4.8	-0.06496	0.435438
	YDR346C_12	7.06	6.975	7	7.9	-0.06148	0.880183
	YBR162C_52	9.06	9.151	9	9	-0.05637	-0.118031
	YDR372C_74	6.19	6.442	6.1	6.6	-0.05523	0.191575
	YDR352W_119	4.46	4.282	4.4	4.5	-0.04681	0.181942
	YKL004W_232	6.5	6.105	6.5	6.6	-0.03385	0.446224
	YBL045C_81	7.13	6.946	7.1	6.5	-0.02928	-0.482621
	YDR346C_67	7.06	6.975	7	7.8	-0.02858	0.845775
	YKR100C_173	4.95	5.028	4.9	5.6	-0.0233	0.605796
	YDR399W_40	6.44	6.969	6.4	5.9	-0.01359	-1.04348
	YML086C_136	6.94	6.96	6.9	6.9	-0.01313	-0.102939
	YIL048W_120	6.26	6.545	6.3	6.2	-0.01118	-0.381105
	YJL129C_187	6.32	6.631	6.3	7.6	-0.00864	0.920343
	YDL135C_14	5.2	4.933	5.2	4	-0.00852	-0.883526
	YOL105C_221	4.2	4.449	4.2	4.5	-0.00806	0.014564
	YBL030C_37	8.23	7.972	8.2	7.8	-0.00396	-0.186855
	YPL252C_7	4.78	4.508	4.8	2.5	-0.00242	-2.04453
	YOR116C_71	7.81	7.457	7.8	7.4	0.00517	-0.085736
	YNL103W_55	5.41	5.187	5.4	5.8	0.00544	0.598529
	YNL251C_167	6.12	6.133	6.1	5.8	0.00987	-0.347467
	YGL116W_47	5.18	4.91	5.2	2.5	0.01656	-2.44603
	YOR095C_22	5.17	4.61	5.2	4	0.02195	-0.561885
	YBR014C_41	4.75	4.876	4.8	3.5	0.02619	-1.41225
	YPL145C_140	6.9	6.821	6.9	5.6	0.02671	-1.18688
	YKL190W_26	5.39	5.187	5.4	5.6	0.02681	0.446883
	YNL156C_145	5.48	5.862	5.5	6.3	0.02902	0.408947
	YGL114W_5	5.38	5.709	5.4	6	0.03087	0.340121
	YOR142W_164	6.48	6.817	6.5	6	0.03314	-0.768715
	YDL145C_176	9.06	9.165	9.1	8.7	0.03489	-0.415721
	YPR119W_95	6.09	6.307	6.1	6.9	0.03697	0.548508
	YMR176W_67	6.09	5.905	6.1	4	0.03811	-1.85586
	YPR149W_20	8.32	8.306	8.4	8.2	0.04253	-0.141274
	YLR256W_91	8.37	8.655	8.4	8.7	0.04259	0.037529
	YOL103W_25	6.37	6.758	6.4	7.3	0.04308	0.563882
	YDR232W_92	7.06	7.222	7.1	7.8	0.04391	0.599731
	YKR042W_17	9.71	9.458	9.8	9.1	0.0496	-0.333253
	YDR072C_56	5.56	6.561	5.6	8	0.05104	1.45772
	YDR372C_105	6.19	6.442	6.3	6.5	0.06446	0.022373
	YPL246C_8	5.71	5.766	5.8	5.5	0.06948	-0.302732
	YGR189C_27	7.87	7.738	7.9	8.1	0.07115	0.368886
	YNL201C_159	5.62	5.788	5.7	6.5	0.07242	0.675774
	YDR293C_99	8.27	8.369	8.3	8.9	0.07327	0.571523
	YBR187W_109	6.39	5.968	6.5	6.8	0.07519	0.817908
	YKR042W_4	9.71	9.458	9.8	9.1	0.07646	-0.376495
	YDR169C_303	4.85	4.853	4.9	4.5	0.07797	-0.388894
	YNL189W_139	7.68	7.289	7.8	8	0.08251	0.698582
	YOR247W_178	7.5	7.353	7.6	8	0.08838	0.665274
	YLR139C_89	3.84	3.692	3.9	3.5	0.08874	-0.228495
	YHR021C_7	8.51	7.934	8.6	7.1	0.08921	-0.826436
	YLR130C_36	7.16	6.399	7.3	6.5	0.09	0.064984
	YBR078W_133	10.4	10.433	10.5	10.5	0.09052	0.091981
	YGL248W_8	4.97	4.96	5.1	4.5	0.09799	-0.495886
	YHL010C_5	4.32	4.575	4.4	3.5	0.09825	-1.11092
	YLR372W_61	7.53	7.342	7.6	7	0.10066	-0.354225
	YNL197C_38	5.9	5.927	6	4.8	0.10166	-1.14141
	YGR054W_117	7.15	6.775	7.3	7.3	0.10184	0.547111
	YBR086C_59	8.02	8.182	8.1	8.3	0.11293	0.088936
	YOR346W_52	5.89	5.85	6	5.6	0.11407	-0.216345
	YJR090C_162	6.35	6.161	6.5	6.9	0.11488	0.694877
	YLR256W_110	8.37	8.655	8.5	8.6	0.11782	-0.021285
	YDL188C_130	6.53	6.641	6.7	7	0.11926	0.346102
	YGR119C_34	6.13	5.943	6.3	4.8	0.12256	-1.15716
	YDL025C_83	5.29	5.58	5.4	6	0.12772	0.467186
	YOR095C_16	5.17	4.611	5.3	4	0.13702	-0.562008
	YKL140W_218	5.56	5.836	5.7	6.4	0.13797	0.535021
	YER118C_133	5.16	4.772	5.3	4.8	0.15101	0.014021
	YHR205W_217	6.66	6.519	6.8	5.9	0.15501	-0.595838
	YCL017C_56	6.69	6.372	6.9	5.9	0.16383	-0.448733
	YKR002W_25	5.24	5.29	5.4	6.2	0.17357	0.875043
	YBR214W_27	5.75	6.158	5.9	4.5	0.18487	-1.69429
	YDL074C_40	5.88	5.786	6.1	5.6	0.18635	-0.152597
	YMR212C_86	6.23	6.075	6.4	6.4	0.18814	0.295597
	YHR004C_59	4.41	4.575	4.6	4.5	0.19868	-0.110984
	YLR277C_69	5.41	5.037	5.6	4.5	0.19996	-0.573568
	YNL238W_38	6.16	6.471	6.4	7.4	0.20142	0.947033
	YGR169C-A_59	2.98	2.783	3.2	3.5	0.20977	0.680847
	YDL160C_96	7.64	7.506	7.9	7.7	0.21296	0.205485
	YOL105C_110	4.2	4.448	4.4	2.5	0.2145	-1.98448
	YGL190C_203	5.85	6.008	6.1	6.6	0.2197	0.625315
	YNL037C_62	7.06	7.518	7.3	8.3	0.22139	0.753103
	YBR283C_80	7.92	7.891	8.1	8.6	0.22593	0.68217
	YNL007C_106	7.38	7.085	7.6	6.6	0.22689	-0.450401
	YPL032C_133	6.96	7.152	7.2	6.5	0.22763	-0.687986
	YPL145C_169	6.9	6.821	7.1	7.2	0.22835	0.397302
	YGR138C_152	6.77	6.699	7	6.9	0.23426	0.157174
	YDR099W_11	7.81	8.131	8.1	7.5	0.2428	-0.622852
	YBR086C_187	8.02	8.182	8.3	8.6	0.24761	0.41048
	YDR214W_35	6.89	5.81	7.1	6.7	0.24775	0.905462
	YOL063C_27	5.52	5.467	5.8	4.5	0.25248	-1.00292
	YGR036C_148	3.34	3.367	3.6	4	0.26474	0.681985
	YPL179W_141	6.2	6.211	6.5	7	0.26965	0.837396
	YDR082W_14	3.92	3.798	4.2	5.8	0.27056	1.98816
	YCR004C_26	6.76	6.938	7	8.2	0.27131	1.22685
	YGR255C_26	5.92	6.115	6.2	5.3	0.27138	-0.843782
	YDR033W_20	10.06	10.221	10.3	10.6	0.27208	0.360552
	YDR414C_54	3.92	4.348	4.2	4	0.27311	-0.299104
	YBL052C_141	5.5	5.788	5.8	5.3	0.27461	-0.516792
	YKL164C_58	8.01	8.144	8.3	9	0.27614	0.825931
	YLR286C_132	8.97	8.756	9.2	9.4	0.27663	0.661686
	YDR372C_149	6.19	6.44	6.5	6.4	0.27782	-0.070212
	YMR189W_31	8.62	9.556	8.9	9.5	0.27826	-0.089402
	YOL123W_321	7.26	7.683	7.5	7.9	0.27889	0.206547
	YDR372C_65	6.19	6.442	6.5	7	0.27934	0.606556
	YNL294C_48	5.02	5.213	5.3	5.3	0.28856	0.057937
	YKL140W_72	5.56	5.836	5.9	5	0.29817	-0.787102
	YDR293C_474	8.27	8.369	8.6	9.1	0.29925	0.737246
	YLR229C_184	5.89	5.848	6.2	6.9	0.30208	1.00765
	YDR284C_183	5.21	5.99	5.5	6.5	0.30216	0.473482
	YML106W_163	7.35	7.029	7.7	6.9	0.30287	-0.172419
	YOR014W_175	7	7.034	7.3	7.4	0.30365	0.387096
	YDR214W_94	6.89	5.805	7.2	6.3	0.30557	0.467345
	YNL007C_100	7.38	7.085	7.7	6.7	0.31437	-0.372183
	YPR125W_26	4.75	4.865	5.1	3.5	0.31621	-1.40172
	YNR055C_397	6.42	6.068	6.7	5.6	0.31711	-0.434021
	YDR524C-B_20	9.29	9.257	9.6	9.7	0.32025	0.416156
	YDL055C_21	10.27	10.123	10.6	10.2	0.32446	0.048855
	YJL079C_36	6.89	8.015	7.2	8.6	0.32962	0.5564
	YBR059C_113	7.28	7.189	7.6	8.3	0.3307	1.10775
	YPR149W_138	8.32	8.306	8.7	9	0.33114	0.742947
	YDL081C_41	9.34	8.638	9.7	8.9	0.3337	0.252169
	YOR196C_1	4.86	4.797	5.2	4.8	0.33522	-0.011338
	YJL129C_149	6.32	6.631	6.7	7.6	0.33599	0.962058
	YGL167C_276	7.72	7.97	8.1	7.9	0.34228	-0.079872
	YGL022W_12	8.42	8.355	8.8	8.5	0.34415	0.10957
	YBL030C_10	8.23	7.972	8.6	8.2	0.34699	0.191935
	YPR065W_16	4.43	4.432	4.8	5.3	0.34855	0.838883
	YOR043W_262	5.78	6.042	6.1	6.6	0.35157	0.510118
	YNR055C_391	6.42	6.067	6.8	5.6	0.35754	-0.433639
	YDL160C_228	7.64	7.507	8	7.6	0.36007	0.126814
	YLR229C_172	5.89	5.848	6.3	7	0.36091	1.13896
	YDR466W_41	5.25	5.508	5.6	5.3	0.36234	-0.237285
	YPL184C_23	7.05	7.306	7.4	7.2	0.36841	-0.141437
	YBR086C_47	8.02	8.182	8.4	8.4	0.3709	0.259118
	YDR452W_94	6.85	7.432	7.2	8.5	0.37563	1.03091
	YDR298C_76	6.48	6.279	6.9	7	0.37584	0.769654
	YMR145C_159	7.14	6.731	7.5	8	0.37755	1.25568
	YBL032W_30	6.87	6.537	7.3	6.9	0.38421	0.319297
	YDR306C_4	4.39	4.614	4.8	5.6	0.38777	1.01926
	YOL016C_73	5.31	5.683	5.7	6.6	0.3879	0.951176
	YJR045C_99	10.45	10.594	10.8	11.7	0.40023	1.06944
	YNL032W_28	4.01	3.856	4.4	3.5	0.40042	-0.39231
	YOL063C_6	5.52	5.467	5.9	4.8	0.4045	-0.680884
	YER111C_290	6.05	5.754	6.5	6.2	0.41511	0.410178
	YNL064C_80	8.25	7.674	8.7	8.5	0.41581	0.854883
	YBR015C_59	7.19	6.899	7.6	6.2	0.41602	-0.73438
	YHR008C_2	7	7.007	7.4	7.7	0.41641	0.703617
	YLR208W_32	7.1	7.006	7.5	7.9	0.41787	0.884243
	YPL184C_355	7.05	7.306	7.5	7.7	0.41928	0.406021
	YAL016W_47	7.18	7.099	7.6	7.7	0.42371	0.612183
	YGL037C_42	7.49	7.267	7.9	7.4	0.42691	0.151994
	YGL037C_45	7.49	7.267	7.9	7.4	0.42691	0.151994
	YDR071C_26	6.17	6.274	6.6	6.9	0.43109	0.647734
	YPL089C_116	4.5	4.756	4.9	4	0.43327	-0.707567
	YGL077C_75	7.6	7.585	8	7.8	0.43375	0.236154
	YLR372W_100	7.53	7.343	8	7.6	0.43423	0.208284
	YJL166W_9	5.69	5.441	6.1	5.3	0.43634	-0.169469
	YJL166W_16	5.69	5.441	6.1	6.7	0.43636	1.27067
	YER020W_40	5.49	5.541	5.9	6.2	0.44155	0.623143
	YER118C_121	5.16	4.771	5.6	5.3	0.45101	0.500199
	YLR096W_62	6.29	6.363	6.7	7.2	0.45118	0.855555
	YHR009C_165	6.91	6.953	7.4	7	0.45739	0.095603
	YER048C_20	6.47	6.172	6.9	6	0.45772	-0.123476
	YBL030C_1	8.23	7.972	8.7	8.2	0.45812	0.219363
	YKL064W_57	6.24	6.506	6.7	5.9	0.45856	-0.583329
	YGR279C_18	9.65	9.622	10.1	10.5	0.45871	0.854386
	YGL190C_86	5.85	6.008	6.3	5.9	0.46115	-0.084993
	YDR490C_41	5.54	5.314	6	6	0.46131	0.734653
	YLR093C_39	5.31	5.495	5.8	6.5	0.46359	0.968466
	YLR206W_77	6.6	6.535	7.1	7	0.46436	0.452169
	YBL099W_54	9.11	9.06	9.6	9.3	0.46916	0.210285
	YGR020C_43	6.35	6.459	6.8	6.9	0.46918	0.397791
	YLR023C_82	5.78	6.091	6.3	5.9	0.46995	-0.167989
	YML086C_121	6.94	6.96	7.4	7.3	0.47164	0.362565
	YLR229C_154	5.89	5.848	6.4	7.3	0.47194	1.42279
	YBR086C_172	8.02	8.182	8.5	8.7	0.47203	0.566649
	YIL033C_75	6.62	6.732	7.1	7.6	0.47872	0.900943
	YGR210C_76	5.93	5.69	6.4	5.3	0.48905	-0.418331
	YGR255C_17	5.92	6.115	6.4	5.8	0.49394	-0.329329
	YLR206W_59	6.6	6.535	7.1	6.6	0.49642	0.098646
	YAL053W_94	6.81	6.925	7.3	6.9	0.49662	-0.068912
	YER123W_44	4.92	5.146	5.4	5	0.4982	-0.097373
	YMR241W_84	7.09	6.852	7.6	8.1	0.49937	1.28478
	YDR497C_16	9.5	9.374	10	8.9	0.50087	-0.483767
	YNL201C_129	5.62	5.788	6.1	6.7	0.5081	0.9235
	YBR078W_87	10.4	10.434	10.9	11.5	0.51266	1.06547
	YMR223W_133	4.67	4.69	5.2	4.5	0.52114	-0.226464
	YBR067C_11	8.02	7.784	8.5	8.5	0.52173	0.724279
	YKR014C_15	5.25	5.472	5.8	5.9	0.52597	0.451396
	YMR108W_25	8.37	7.772	8.9	8.5	0.52792	0.757693
	YNL085W_105	8.17	8.067	8.7	8.6	0.52874	0.504204
	YEL026W_62	6.85	6.153	7.4	7.1	0.53454	0.9546
	YER089C_116	7.02	6.9	7.6	8.2	0.54137	1.29188
	YLR093C_4	5.31	5.496	5.9	6.4	0.54202	0.8746
	YEL009C_129	8.46	8.63	9	9.7	0.54348	1.05422
	YER012W_30	6.27	6.22	6.8	7	0.54452	0.828898
	YMR241W_21	7.09	6.853	7.6	7.6	0.54695	0.781106
	YNL164C_91	3.37	3.158	3.9	4.5	0.55573	1.30548
	YGL190C_292	5.85	6.008	6.4	6.8	0.56737	0.777408
	YNL085W_86	8.17	8.069	8.7	9	0.56757	0.945439
	YML130C_35	5.99	6.105	6.6	6.3	0.56794	0.166283
	YLR257W_138	6.47	6.127	7	7.2	0.57168	1.03643
	YBR199W_57	6.65	6.726	7.2	7.5	0.57255	0.782462
	YJL129C_131	6.32	6.631	6.9	7.7	0.57686	1.04241
	YJL026W_20	8.16	8.392	8.7	9.7	0.5771	1.33832
	YDR354W_2	5.35	5.039	5.9	5	0.57797	0.010216
	YNR055C_98	6.42	6.065	7	6.5	0.57816	0.398511
	YER107C_73	5.28	5.219	5.9	6.6	0.58034	1.4154
	YMR305C_51	8.06	8.081	8.6	8.8	0.58264	0.723028
	YER027C_24	5.93	5.623	6.5	6	0.58832	0.426078
	YPL190C_38	6.41	6.394	7	5.8	0.5919	-0.60765
	YBR164C_32	5.66	5.603	6.3	6.5	0.5927	0.861224
	YNL032W_68	4.01	3.856	4.6	3.5	0.59407	-0.392126
	YKL185W_263	6.58	6.781	7.2	8.6	0.60622	1.79461
	YHR026W_35	7.28	7.313	7.9	8	0.60951	0.674375
	YGL028C_127	6.7	6.474	7.3	8	0.61252	1.5144
	YML018C_38	5.08	4.93	5.7	2.5	0.61564	-2.46646
	YML106W_125	7.35	7.029	8	7.6	0.61677	0.564299
	YKR003W_60	5.75	5.596	6.4	6.6	0.6174	0.95499
	YDR531W_33	5.44	5.406	6.1	4	0.62735	-1.35742
	YDL188C_115	6.53	6.641	7.2	7.4	0.63078	0.776911
	YGL058W_21	4.88	4.711	5.5	5	0.63844	0.337466
	YDR350C_14	4.55	4.748	5.2	4	0.63985	-0.69917
	YDR046C_52	6.84	7.089	7.5	7.3	0.64588	0.232169
	YJL129C_122	6.32	6.631	7	7.7	0.64887	1.08095
	YPR165W_134	7.26	7.376	7.9	8.1	0.65052	0.763472
	YMR190C_118	6.28	5.86	6.9	6.6	0.65299	0.773643
	YBR078W_78	10.4	10.434	11.1	11.7	0.65368	1.26118
	YLR407W_190	3.54	3.178	4.2	5	0.65482	1.86955
	YFR053C_11	8.98	9.443	9.6	10.7	0.66121	1.21944
	YLR009W_25	4.75	4.628	5.4	5.8	0.6615	1.15718
	YPL023C_88	5.9	5.992	6.6	5.5	0.66532	-0.528887
	YDL002C_43	3.94	3.832	4.6	3.5	0.66672	-0.36824
	YMR016C_157	4.75	4.441	5.4	4	0.66828	-0.392877
	YMR097C_22	3.94	4.098	4.6	5	0.66894	0.95146
	YML106W_100	7.35	7.028	8	7.7	0.66935	0.644931
	YPL184C_329	7.05	7.306	7.7	7.7	0.67092	0.405025
	YMR238W_75	6.1	6.324	6.8	7.7	0.67886	1.34872
	YOR089C_10	4.63	4.751	5.3	5	0.68013	0.297391
	YBR212W_332	5.51	5.983	6.2	6.4	0.68472	0.38815
	YNL201C_99	5.62	5.788	6.3	6.9	0.68514	1.06774
	YDR062W_12	7.15	7.231	7.8	7.8	0.68521	0.554682
	YLR079W_8	5.09	5.012	5.8	5.9	0.68682	0.911548
	YDL072C_26	6.31	6.522	7	7.5	0.69347	0.941807
	YLR025W_60	4.72	4.602	5.4	4.8	0.69628	0.183438
	YHR072W-A_9	5.37	5.246	6.1	5.6	0.69672	0.387665
	YGL224C_65	4.07	3.673	4.8	2.5	0.70575	-1.20974
	YGL077C_85	7.6	7.585	8.3	7.8	0.70803	0.236455
	YML071C_21	4.89	4.802	5.6	4	0.71878	-0.753566
	YOR008C_28	5.59	5.606	6.3	6.3	0.72013	0.665098
	YDR293C_417	8.27	8.368	9	9.4	0.7306	1.02446
	YJR045C_25	10.45	10.594	11.2	11.4	0.73105	0.774548
	YER089C_264	7.02	6.9	7.8	7.7	0.73716	0.84934
	YBR059C_101	7.28	7.189	8	8.4	0.73997	1.22886
	YNR051C_228	5.99	6.42	6.7	6.9	0.75199	0.503201
	YAL040C_246	6.12	6.253	6.9	7.2	0.76919	0.965494
	YCR068W_86	4.92	4.745	5.7	5.3	0.77337	0.5262
	YIL002C_126	5.53	5.507	6.3	5.5	0.7738	-0.043362
	YPR149W_92	8.32	8.306	9.1	9.2	0.77877	0.939541
	YGR167W_10	6.46	6.325	7.3	6.4	0.79206	0.04538
	YPR073C_12	5.27	5.115	6.1	5.9	0.79278	0.808016
	YOR110W_39	4.51	4.502	5.3	5.6	0.80223	1.13034
	YJR007W_35	6.73	6.712	7.5	6.9	0.80636	0.143127
	YBR164C_19	5.66	5.603	6.5	6	0.80781	0.44577
	YBR162C_28	9.06	9.151	9.9	10	0.80868	0.898603
	YOR194C_34	4.8	4.592	5.6	5.6	0.8106	1.04209
	YNL189W_54	7.68	7.289	8.5	8.1	0.82757	0.847741
	YOR043W_240	5.78	6.042	6.6	7.2	0.82784	1.17747
	YLR089C_191	6.06	6.047	6.9	7.2	0.82853	1.17129
	YDR046C_37	6.84	7.089	7.7	7.4	0.82957	0.328239
	YER100W_181	4.77	4.843	5.6	4.5	0.83287	-0.378795
	YHR195W_95	4.36	4.299	5.2	4.8	0.83664	0.486696
	YOR152C_465	3.57	3.856	4.4	4.5	0.84685	0.607107
	YOR152C_267	3.57	3.852	4.4	6.9	0.84734	3.07076
	YBR154C_28	5.85	5.521	6.7	5	0.84769	-0.471878
	YHR104W_46	6.71	6.293	7.6	7.7	0.84896	1.37932
	YHR005C_12	6.04	6.122	6.9	7.7	0.85134	1.55031
	YDR214W_87	6.89	5.808	7.7	6.9	0.85239	1.11746
	YDR284C_125	5.21	5.99	6.1	7	0.85509	1.05874
	YMR016C_144	4.75	4.441	5.6	4.8	0.86126	0.344867
	YPL184C_249	7.05	7.306	7.9	8.6	0.86575	1.3279
	YGL257C_70	5.44	5.537	6.3	4.8	0.86794	-0.751683
	YEL051W_30	7.53	7.417	8.4	7.9	0.868	0.473147
	YHL034C_54	7.5	7.938	8.4	9	0.87259	1.09563
	YJL164C_110	5.82	6.083	6.7	5.6	0.87617	-0.450009
	YBR221C_37	8.25	8.298	9.1	8.6	0.87631	0.335805
	YDL027C_32	4.63	5.155	5.5	4.5	0.88317	-0.692521
	YBR078W_109	10.4	10.434	11.3	11.7	0.88467	1.25369
	YDR086C_46	6.17	5.922	7.1	6.5	0.89446	0.542351
	YIL038C_152	6.27	5.914	7.2	7.5	0.89566	1.59274
	YDR492W_60	4.52	4.866	5.4	6.4	0.89986	1.50495
	YBR208C_63	5.99	8.041	6.9	6	0.9	-1.99253
	YGR024C_20	4.88	5.046	5.8	4.5	0.90066	-0.582171
	YPR149W_71	8.32	8.305	9.2	9.3	0.9088	1.01631
	YKL005C_12	4.7	4.79	5.6	5.3	0.91164	0.481777
	YGL167C_230	7.72	7.97	8.6	8.7	0.91654	0.703432
	YIL033C_57	6.62	6.733	7.5	8.1	0.91744	1.34534
	YOR039W_92	5.86	5.628	6.8	7	0.91902	1.35905
	YGR221C_21	4.14	4.685	5.1	4.8	0.92225	0.101281
	YHR205W_155	6.66	6.519	7.6	7.5	0.92227	0.944658
	YPL141C_144	5.93	5.648	6.9	5.8	0.92286	0.137997
	YDR033W_197	10.06	10.221	11	10.9	0.92921	0.653455
	YGR229C_97	6.61	6.731	7.5	7.1	0.93083	0.376986
	YML106W_82	7.35	7.029	8.3	7.8	0.93176	0.756839
	YPL256C_94	6.51	6.621	7.4	7.8	0.93801	1.12934
	YDL081C_23	9.34	8.638	10.3	9.4	0.93965	0.757218
	YHR079C_88	5.83	5.837	6.8	6.5	0.94482	0.626497
	YDR441C_65	3.83	3.543	4.8	4.8	0.94623	1.24255
	YER035W_49	4.66	4.465	5.6	6	0.94634	1.58369
	YDR303C_126	6.12	5.993	7.1	6.5	0.94711	0.470734
	YNL197C_144	5.9	5.927	6.9	6.9	0.95799	0.99624
	YEL009C_117	8.46	8.63	9.4	10.3	0.9602	1.62445
	YKL176C_64	6.34	6.534	7.3	7.2	0.96591	0.684694
	YBR078W_51	10.4	10.434	11.4	11.9	0.96776	1.43783
	YMR089C_49	6.91	6.707	7.9	7.6	0.96805	0.843769
	YFL005W_75	6.46	6.579	7.4	8	0.97754	1.43917
	YFL005W_78	6.46	6.579	7.4	8	0.97757	1.40781
	YOR307C_62	5.21	5.172	6.2	5.8	0.98389	0.613817
	YMR139W_156	4.71	4.826	5.7	6.2	0.98593	1.33823
	YBR078W_39	10.4	10.434	11.4	11.9	0.98607	1.46517
	YEL013W_136	7.39	7.502	8.4	8.7	0.98611	1.2472
	YGR241C_89	5.57	5.254	6.6	7.2	0.99143	1.9101
	YML058W_2	7.2	6.473	8.2	8.1	0.99166	1.63487
	YER067W_10	4.42	4.486	5.4	4.8	1.00024	0.299322
	YCL017C_44	6.69	6.371	7.7	7.7	1.00358	1.34065
	YBR060C_33	4.6	4.476	5.6	4.5	1.01166	-0.012118
	YJR090C_72	6.35	6.161	7.4	6.8	1.01231	0.624782
	YJR090C_75	6.35	6.161	7.4	6.7	1.01231	0.550851
	YDL224C_233	5.98	6.017	7	7.3	1.01663	1.2535
	YJL003W_18	3.18	3.454	4.2	5	1.0173	1.59477
	YPL020C_59	4.84	4.826	5.9	5.6	1.01936	0.807955
	YEL042W_50	7.15	6.662	8.2	8	1.03142	1.32536
	YNL164C_67	3.37	3.159	4.4	5.5	1.04058	2.30579
	YKR068C_23	4.81	4.645	5.9	4.5	1.04621	-0.181607
	YER057C_26	5.81	6.209	6.9	7.4	1.04918	1.20931
	YGR086C_31	8.93	8.73	10	9.7	1.05797	0.96344
	YOL123W_275	7.26	7.683	8.3	8.5	1.06316	0.780754
	YNL197C_126	5.9	5.927	7	6.9	1.06778	0.996308
	YKR067W_66	6	6.25	7.1	7.3	1.07151	1.07215
	YNL151C_16	4.62	4.17	5.7	4	1.07177	-0.120975
	YMR200W_69	5.54	5.639	6.6	6.6	1.07265	0.911807
	YDL180W_21	4.78	4.661	5.9	5.6	1.07638	0.972996
	YMR005W_10	4.99	4.603	6.1	4	1.07655	-0.554633
	YNL161W_34	5.81	5.538	6.9	7.3	1.07816	1.73312
	YMR296C_23	7.05	6.847	8.1	8	1.08338	1.20256
	YOL043C_51	2.85	2.882	3.9	4	1.08422	1.16644
	YDR247W_189	4.22	4.275	5.3	6	1.08847	1.77435
	YPL254W_8	4.84	4.891	5.9	5.5	1.09004	0.572065
	YER094C_31	6.56	6.681	7.7	7	1.09423	0.304615
	YCR028C_66	4.59	4.888	5.7	5.8	1.0997	0.898248
	YOR307C_72	5.21	5.172	6.3	5.3	1.09976	0.098699
	YPL141C_135	5.93	5.648	7	6.6	1.10114	0.903413
	YOL105C_77	4.2	4.45	5.3	5	1.10756	0.59886
	YLR073C_76	3.96	2.893	5.1	3.5	1.10998	0.570089
	YNL090W_134	4.74	4.542	5.9	4.8	1.11871	0.243412
	YBR059C_82	7.28	7.189	8.4	8.8	1.12455	1.57852
	YGL071W_140	5.13	5.177	6.3	5.9	1.12507	0.745797
	YGR178C_31	7.59	7.188	8.7	8.2	1.12844	1.03015
	YML106W_230	7.35	7.029	8.5	7.9	1.12913	0.894009
	YBR135W_62	4.56	4.011	5.7	3.5	1.13093	-0.547716
	YFR049W_25	4.38	4.277	5.5	5.5	1.13582	1.18656
	YPR020W_3	4.47	4.567	5.6	4	1.13714	-0.518535
	YER111C_251	6.05	5.755	7.2	7.1	1.14192	1.35295
	YGR041W_176	5.51	5.191	6.7	7.6	1.14233	2.44269
	YGR138C_33	6.77	6.699	7.9	7.9	1.14553	1.15754
	YEL013W_124	7.39	7.502	8.5	8.8	1.14855	1.33669
	YBR054W_38	8.44	7.896	9.6	9.4	1.14899	1.49926
	YLR019W_254	5.16	5.035	6.3	4.8	1.15274	-0.248896
	YOR209C_51	6.8	7.028	8	8	1.16201	0.990925
	YGR241C_77	5.57	5.254	6.7	7.4	1.16651	2.16377
	YBR208C_54	5.99	8.041	7.2	6.2	1.16918	-1.87717
	YER111C_240	6.05	5.755	7.2	7.2	1.1714	1.46373
	YPL214C_60	4.68	5.46	5.9	5.3	1.17696	-0.18833
	YOR346W_110	5.89	5.85	7.1	6.6	1.18026	0.783084
	YGL019W_25	5.81	5.513	7	6.5	1.18232	0.950226
	YGR166W_30	4.42	4.645	5.6	4.5	1.19271	-0.181327
	YML023C_18	4.32	3.257	5.5	4	1.19444	0.791532
	YDL053C_130	4.93	5.191	6.1	5.9	1.20014	0.732673
	YFL045C_19	8.54	8.321	9.7	9.7	1.20257	1.42904
	YNR051C_560	5.99	6.421	7.2	7.7	1.20646	1.29158
	YOL123W_297	7.26	7.683	8.5	8.6	1.20694	0.93021
	YML106W_101	7.35	7.029	8.6	8.2	1.21383	1.2165
	YBR059C_77	7.28	7.189	8.5	8.9	1.22495	1.667
	YGR057C_38	3.18	3.161	4.4	4.5	1.23293	1.30284
	YJR007W_17	6.73	6.713	8	7.5	1.23303	0.795147
	YDR468C_70	4.07	3.667	5.3	5.3	1.23438	1.60408
	YNR051C_557	5.99	6.421	7.2	7.7	1.2363	1.3291
	YLR188W_20	5.89	5.642	7.1	5.8	1.24056	0.143359
	YOR136W_51	7.84	8.219	9.1	9.4	1.24192	1.1864
	YDL028C_159	5.07	4.887	6.3	5.8	1.24292	0.898362
	YBL099W_76	9.11	9.06	10.4	10.2	1.24503	1.11686
	YLL027W_124	4.53	4.708	5.8	5.8	1.24605	1.07779
	YEL026W_49	6.85	6.152	8.1	7.5	1.24854	1.3153
	YDR248C_50	4.06	4.422	5.3	5.9	1.24951	1.5014
	YKR099W_114	4.36	4.163	5.6	4	1.25155	-0.114494
	YNL307C_99	6.8	7.09	8.1	8.6	1.25353	1.48307
	YIL005W_77	5.88	6.226	7.1	7.6	1.25507	1.32528
	YER057C_8	5.81	6.209	7.1	7.7	1.26104	1.50301
	YEL023C_43	3.67	3.712	4.9	5	1.26251	1.33696
	YDL146W_74	4.73	5.136	6	6.6	1.26853	1.49725
	YFL050C_80	3.66	4.108	4.9	4.8	1.2695	0.677108
	YGR065C_16	5.09	4.794	6.4	5.5	1.27123	0.670336
	YNL165W_33	3.66	3.154	4.9	-1.3	1.27165	-4.45412
	YDR298C_26	6.48	6.279	7.8	7	1.27739	0.769976
	YDL073W_136	5.72	5.631	7	5.3	1.28175	-0.360201
	YPL184C_467	7.05	7.306	8.3	9	1.28889	1.71254
	YDR347W_20	5.63	5.767	6.9	6.7	1.30283	0.944761
	YOR363C_16	4.82	4.989	6.1	6.6	1.31289	1.56163
	YPR133W-A_1	5.15	5.384	6.5	5.6	1.31303	0.249969
	YGL202W_83	8.36	8.098	9.7	9.3	1.31461	1.24763
	YBR132C_101	5.85	6.285	7.2	7.5	1.31642	1.22421
	YLR023C_64	5.78	6.091	7.1	6.5	1.31751	0.372615
	YNR051C_219	5.99	6.42	7.3	8	1.3231	1.53574
	YNL064C_141	8.25	7.674	9.6	8.6	1.32362	0.918624
	YGL087C_2	4.37	4.038	5.7	4.5	1.32702	0.426275
	YNR017W_141	5.98	6.004	7.3	7.6	1.32964	1.58808
	YKL181W_32	7.58	7.179	8.9	8.8	1.33026	1.58819
	YOR014W_150	7	7.037	8.3	8.3	1.33613	1.31002
	YDR054C_57	5.27	5.247	6.6	5.9	1.33996	0.67652
	YMR305C_39	8.06	8.081	9.4	9.5	1.34455	1.39468
	YDR284C_29	5.21	5.992	6.6	7.5	1.34891	1.47286
	YBR054W_29	8.44	7.896	9.8	9.6	1.35108	1.70838
	YGR033C_30	4.83	4.89	6.2	6.2	1.35741	1.27432
	YPL145C_121	6.9	6.822	8.3	7.7	1.363	0.890039
	YAL040C_239	6.12	6.253	7.5	8	1.36626	1.76561
	YDL188C_109	6.53	6.643	7.9	8.3	1.38271	1.67782
	YPL023C_66	5.9	5.993	7.3	6.9	1.38315	0.930947
	YLR378C_34	8.24	8.252	9.6	9.2	1.38921	0.912465
	YOL019W_77	5.22	5.743	6.6	7.6	1.39456	1.80892
	YPL250C_41	2.8	2.402	4.2	3.5	1.396	1.06269
	YDR453C_3	3.02	4.071	4.4	5.5	1.40013	1.39382
	YDR453C_12	3.01	4.072	4.4	5	1.40038	0.977779
	YDL014W_93	7.85	7.327	9.2	9.1	1.40239	1.75202
	YNR051C_210	5.99	6.42	7.4	8	1.40403	1.59846
	YBL099W_67	9.11	9.06	10.5	10.3	1.40819	1.248
	YNL197C_197	5.9	5.927	7.3	8	1.41109	2.02895
	YNL219C_54	6.24	6.335	7.7	7.3	1.41185	0.986469
	YDR280W_76	4.44	4.527	5.9	5.6	1.41427	1.10624
	YPL184C_124	7.05	7.306	8.5	9.3	1.41952	1.97855
	YPR138C_104	5.47	6.072	6.9	6.5	1.42504	0.392139
	YML043C_148	3.35	3.767	4.8	4.8	1.42931	1.01787
	YJL140W_2	5.46	5.062	6.9	4	1.43012	-1.01318
	YGR036C_37	3.34	3.368	4.8	4.5	1.43386	1.0953
	YDL188C_77	6.53	6.643	8	8.3	1.436	1.62826
	YHR205W_139	6.66	6.519	8.1	7.7	1.43669	1.1927
	YOL012C_21	5.3	5.095	6.7	6.6	1.43886	1.53853
	YPL050C_67	6.14	6.085	7.6	7.9	1.44308	1.77149
	YDL014W_87	7.85	7.327	9.3	9.1	1.44487	1.781
	YLL010C_124	4.69	4.321	6.1	4.8	1.44487	0.464469
	YKL004W_67	6.5	6.105	7.9	7.3	1.44788	1.21681
	YNL066W_75	7.85	7.441	9.3	9.1	1.4506	1.67173
	YNL190W_178	8.07	8.249	9.5	9.3	1.45625	1.04811
	YBR212W_203	5.51	5.983	7	7.2	1.45758	1.23593
	YOL123W_88	7.26	7.683	8.7	8.7	1.46758	0.970525
	YPL184C_118	7.05	7.306	8.5	9.3	1.46862	2.01633
	YNL283C_130	5.69	5.753	7.2	7.3	1.47243	1.56933
	YMR139W_141	4.71	4.826	6.2	6.9	1.48366	2.03059
	YPR016C_24	6.41	6.369	7.9	7.8	1.4884	1.41721
	YER076C_1	2.92	3.179	4.4	3.5	1.49546	0.285367
	YBR054W_16	8.44	7.896	9.9	9.7	1.49618	1.82595
	YDR251W_72	6.58	6.858	8.1	8.6	1.50501	1.77526
	YGR135W_60	6.94	7.014	8.4	8.3	1.50541	1.30745
	YPR016C_21	6.41	6.369	7.9	7.8	1.5067	1.41726
	YDL141W_118	6.19	5.738	7.7	7.2	1.50716	1.48093
	YHR210C_25	2.09	1.475	3.6	2.5	1.51284	0.989369
	YJR045C_18	10.45	10.594	12	12.5	1.51748	1.88958
	YER148W_98	6.11	6.042	7.6	7.9	1.52025	1.81367
	YEL023C_126	3.67	3.712	5.2	4.8	1.52523	1.07281
	YGR020C_18	6.35	6.46	7.9	7.6	1.52794	1.09237
	YNL283C_182	5.69	5.751	7.2	6.7	1.5317	0.960143
	YGL115W_44	6.14	5.971	7.7	7.6	1.5341	1.66251
	YNR017W_71	5.98	6.004	7.5	7.3	1.53537	1.26724
	YPL133C_34	4.07	3.702	5.6	5.5	1.53663	1.76149
	YAL034C_112	3.98	4.359	5.5	4.8	1.5369	0.426235
	YDL138W_150	4.82	4.925	6.4	7	1.53987	2.12332
	YMR026C_43	4.15	4.19	5.7	5.6	1.54133	1.44376
	YFL039C_35	11.03	11.132	12.6	13	1.54201	1.9047
	YBR158W_95	7.08	6.879	8.6	8.5	1.54519	1.58411
	YHR050W_141	5.79	5.558	7.3	7.5	1.54623	1.90579
	YBR270C_75	2.87	3.352	4.4	6	1.54774	2.69689
	YOL123W_245	7.26	7.683	8.8	9.2	1.54816	1.54921
	YOR142W_138	6.48	6.817	8	8.6	1.55261	1.79591
	YLR327C_11	2.86	1.855	4.4	4.5	1.55771	2.60708
	YGL257C_49	5.44	5.538	7	5.9	1.55972	0.385061
	YER159C_10	4.37	5.037	5.9	6.4	1.56182	1.33322
	YFR017C_4	3.62	3.272	5.2	4.5	1.57143	1.19317
	YBL103C_156	4.04	4.096	5.6	5	1.57339	0.95321
	YOR246C_40	6.03	5.807	7.6	7	1.5784	1.24172
	YPL256C_68	6.51	6.622	8.1	8.3	1.58381	1.70304
	YPL256C_58	6.51	6.622	8.1	8.3	1.58402	1.67739
	YLR257W_125	6.47	6.128	8.1	7.9	1.60392	1.79578
	YLL018C-A_28	3	2.694	4.6	5	1.60571	2.35533
	YKL183W_88	4.32	4.227	5.9	5.6	1.60621	1.40671
	YDR131C_1	3.59	3.649	5.2	5	1.60653	1.39956
	YJL129C_92	6.32	6.631	7.9	8.7	1.61364	2.0812
	YHL011C_68	6.43	6.055	8	6.7	1.61792	0.656452
	YGL018C_19	2.98	2.311	4.6	5.8	1.62297	3.47455
	YOL032W_60	3.69	3.127	5.3	5.3	1.62329	2.14306
	YDR404C_109	4.62	4.508	6.3	5.5	1.62666	0.955975
	YEL016C_87	4.93	4.699	6.6	6.4	1.62887	1.67184
	YHR205W_90	6.66	6.519	8.3	8.8	1.63097	2.24855
	YGR020C_6	6.35	6.46	8	7.8	1.63587	1.29049
	YEL023C_117	3.67	3.712	5.3	5.6	1.64035	1.9203
	YOR142W_39	6.48	6.817	8.1	8	1.64503	1.14228
	YDR279W_40	3.87	3.948	5.5	5	1.64802	1.10048
	YKR100C_119	4.95	5.029	6.6	6.7	1.6542	1.68389
	YGR071C_31	4.86	4.949	6.5	6.7	1.65453	1.76289
	YCR028C_17	4.59	4.887	6.3	5	1.6566	0.161344
	YPR159W_50	7.95	7.86	9.6	9.7	1.66468	1.88923
	YEL009C_249	8.46	8.63	10.1	10.1	1.66475	1.47044
	YOL123W_79	7.26	7.683	8.9	8.9	1.67029	1.19021
	YDR441C_56	3.83	3.544	5.5	5.8	1.68372	2.24169
	YKL185W_188	6.58	6.782	8.3	9.2	1.69039	2.40222
	YJL174W_40	6.63	6.67	8.3	8.8	1.69803	2.11638
	YIL090W_53	5.33	5.154	7	6.8	1.70767	1.63196
	YLR219W_121	5.43	5.465	7.1	7.6	1.70894	2.16683
	YNL064C_73	8.25	7.674	10	9.7	1.71038	1.98882
	YBR120C_28	3.06	3.404	4.8	3.5	1.71469	0.059905
	YJL164C_101	5.82	6.083	7.5	6.4	1.71739	0.287161
	YER048C_3	6.47	6.173	8.2	7.7	1.71989	1.5756
	YPR138C_59	5.47	6.071	7.2	6.9	1.72532	0.784845
	YHR009C_86	6.91	6.953	8.6	8.1	1.73622	1.18262
	YBR052C_34	6.38	6.495	8.1	7.7	1.73849	1.21707
	YBL103C_132	4.04	4.096	5.8	5	1.74351	0.952884
	YGL028C_102	6.7	6.475	8.4	9	1.74379	2.51414
	YNL176C_115	5.16	5.071	6.9	7	1.74431	1.91728
	YOR034C_13	5.38	5.304	7.1	6.5	1.74962	1.1595
	YCR023C_21	5.44	5.391	7.2	6.3	1.75314	0.879606
	YGL160W_13	5.38	5.525	7.1	6.3	1.7548	0.746456
	YOR047C_46	4.6	4.935	6.4	6.2	1.76369	1.2291
	YDL053C_109	4.93	5.191	6.7	6.4	1.76384	1.18022
	YHR162W_51	6.96	7.017	8.7	9	1.7696	1.95364
	YGR041W_117	5.51	5.193	7.3	8	1.77062	2.79482
	YBR211C_4	3.53	3.433	5.3	5.3	1.77452	1.83815
	YNL090W_124	4.74	4.543	6.5	6	1.77772	1.5052
	YLL010C_113	4.69	4.321	6.5	5.5	1.77982	1.14261
	YPL008W_83	4.77	4.994	6.6	6.4	1.78954	1.37683
	YGR169C-A_37	2.98	2.784	4.8	5	1.79392	2.26539
	YDR248C_46	4.06	4.422	5.9	6.3	1.79685	1.84914
	YAL034C_85	3.98	4.359	5.8	4.8	1.80003	0.426217
	YDR143C_77	5.39	5.286	7.2	7.2	1.80016	1.87899
	YGR161C_20	3.27	2.675	5.1	3.5	1.80088	0.788365
	YJL124C_131	5.22	5.019	7	7.3	1.81711	2.25181
	YPR138C_44	5.47	6.071	7.3	7	1.8408	0.916072
	YOR228C_107	3.35	3.738	5.2	3.5	1.84393	-0.274283
	YBR125C_126	4.81	4.582	6.7	5.5	1.84451	0.8823
	YDL053C_162	4.93	5.19	6.8	6.6	1.84581	1.44385
	YPR156C_44	7.05	7.134	8.9	9	1.84677	1.91358
	YIL038C_71	6.27	5.914	8.1	8.3	1.84745	2.3557
	YIL038C_74	6.27	5.914	8.1	8.3	1.84745	2.3557
	YMR166C_197	3.33	3.128	5.2	5	1.85968	1.9209
	YHR162W_16	6.96	7.019	8.8	8.6	1.86145	1.59609
	YJR134C_16	5.2	5.509	7.1	7.1	1.87135	1.59838
	YMR126C_105	3.31	3.498	5.2	4.8	1.88088	1.28804
	YPL184C_295	7.05	7.306	8.9	9.2	1.88449	1.92545
	YLR229C_72	5.89	5.848	7.8	8	1.88527	2.16984
	YOR065W_34	6.12	6.178	8	8.4	1.88694	2.26293
	YHR205W_133	6.66	6.519	8.5	8.6	1.88733	2.05307
	YDL073W_73	5.72	5.631	7.6	6.7	1.88892	1.08035
	YMR257C_326	4.66	4.938	6.6	6.6	1.89989	1.69515
	YGR105W_10	3.7	4.053	5.6	4	1.90631	-0.003666
	YOR142W_113	6.48	6.817	8.4	9	1.90762	2.13792
	YOR142W_29	6.48	6.817	8.4	8.4	1.91529	1.58028
	YOL012C_63	5.3	5.095	7.2	7.1	1.92365	2.0132
	YDL132W_151	6.7	6.641	8.6	8.7	1.92464	2.01318
	YHR009C_56	6.91	6.953	8.8	8.4	1.93136	1.41728
	YDL014W_57	7.85	7.327	9.8	9.5	1.93657	2.19289
	YPL256C_47	6.51	6.622	8.4	8.5	1.94014	1.86721
	YBR024W_63	3.98	4.605	5.9	6.9	1.9461	2.31845
	YDL132W_148	6.7	6.641	8.6	8.7	1.9472	2.01365
	YLR372W_54	7.53	7.341	9.5	9.3	1.94846	1.92883
	YGR041W_130	5.51	5.193	7.5	8.1	1.95556	2.88653
	YNL064C_43	8.25	7.674	10.2	9.8	1.95755	2.17317
	YDR066C_40	1.97	1.222	3.9	3.5	1.9591	2.24142
	YPR156C_32	7.05	7.134	9	9.2	1.96137	2.10992
	YNL251C_74	6.12	6.135	8.1	8	1.96308	1.9119
	YOR216C_7	4.89	4.775	6.9	6.6	1.96335	1.77603
	YPL184C_369	7.05	7.306	9	9.7	1.97891	2.44358
	YML106W_206	7.35	7.029	9.3	8.7	1.97951	1.71996
	YLL027W_65	4.53	4.708	6.5	6.6	1.98271	1.84311
	YLR019W_224	5.16	5.054	7.1	6.7	1.98756	1.65934
	YGL044C_61	3.85	4.143	5.9	6.5	2.00133	2.32042
	YNL283C_172	5.69	5.751	7.7	7.2	2.00454	1.46745
	YHL011C_32	6.43	6.054	8.4	7.1	2.00687	1.05251
	YDL014W_42	7.85	7.327	9.9	9.6	2.01865	2.22515
	YJL127C_33	4.17	4.153	6.2	5.9	2.0211	1.76975
	YJL124C_79	5.22	5.019	7.3	5	2.0332	0.030183
	YPL177C_47	5.55	4.562	7.6	7.2	2.04059	2.65515
	YDL206W_114	4.47	4.883	6.5	7.4	2.04582	2.53392
	YBR052C_22	6.38	6.496	8.4	8	2.05194	1.52352
	YNL263C_42	5.72	5.638	7.8	7.5	2.05308	1.87108
	YEL016C_63	4.93	4.699	7	6.6	2.06598	1.85228
	YGL044C_34	3.85	4.143	5.9	6.8	2.07559	2.64274
	YGL044C_49	3.85	4.143	5.9	6.8	2.07559	2.64274
	YNL156C_49	5.49	5.86	7.6	7.9	2.07661	2.02977
	YNL066W_39	7.85	7.441	9.9	9.6	2.0801	2.17672
	YOR142W_80	6.48	6.817	8.6	9	2.09258	2.23104
	YGR247W_123	3.76	3.519	5.9	6.2	2.09273	2.64502
	YDL073W_22	5.72	5.631	7.8	6.9	2.09799	1.29177
	YOR246C_13	6.03	5.807	8.1	7.5	2.10197	1.70098
	YLR372W_28	7.53	7.339	9.6	9.6	2.10488	2.23061
	YLR257W_83	6.47	6.128	8.6	8.2	2.11095	2.11807
	YLR273C_160	3.82	3.318	5.9	5.6	2.11162	2.3155
	YGR267C_87	5.9	5.818	8	7.4	2.11676	1.5529
	YGL224C_17	4.07	3.674	6.2	5.3	2.11921	1.59742
	YPL133C_12	4.07	3.703	6.2	5.9	2.12244	2.22019
	YDR206W_91	6.25	6.188	8.4	8.1	2.12959	1.88967
	YLR006C_26	4.9	4.938	7	7	2.13788	2.04956
	YLR019W_206	5.16	5.054	7.3	6.7	2.13808	1.6587
	YPL214C_51	4.68	5.46	6.8	6.6	2.13859	1.17377
	YNL307C_68	6.8	7.091	8.9	8.9	2.14172	1.84904
	YAL014C_34	4.32	4.444	6.5	6.7	2.14727	2.26782
	YBR192W_80	4.46	4.637	6.6	5.6	2.15198	0.996427
	YNL307C_65	6.8	7.091	9	8.9	2.15953	1.84904
	YLR152C_127	4.13	4.447	6.3	6.3	2.17932	1.82217
	YKL185W_128	6.58	6.782	8.8	9.5	2.1991	2.74262
	YOR246C_1	6.03	5.807	8.3	7.7	2.22226	1.90445
	YMR257C_299	4.66	4.938	6.9	7.2	2.23155	2.28011
	YNL207W_50	5.1	4.562	7.3	6.9	2.23176	2.36104
	YOL109W_37	8.37	7.621	10.6	11.9	2.23476	4.23645
	YCR069W_97	5.81	6.113	8.1	8.4	2.23606	2.30432
	YBR028C_25	5.1	5.495	7.4	7.1	2.26498	1.61235
	YGR036C_115	3.34	3.371	5.6	5.3	2.26502	1.90044
	YGR095C_8	3.72	3.772	6	4	2.28462	0.276605
	YML106W_192	7.35	7.029	9.6	9.2	2.29129	2.14929
	YML106W_170	7.35	7.029	9.7	9.1	2.3021	2.06447
	YNL207W_66	5.1	4.562	7.4	6.9	2.31318	2.36071
	YKL053C-A_54	4.1	4.715	6.4	7.1	2.31559	2.39203
	YNL164C_146	3.37	3.157	5.7	6.3	2.32245	3.11365
	YLR019W_176	5.16	5.054	7.5	6.9	2.32274	1.80414
	YJL164C_81	5.82	6.083	8.1	7.9	2.3267	1.80562
	YLR229C_36	5.89	5.848	8.2	8.4	2.34429	2.59257
	YDR357C_38	4.55	4.326	6.9	5.5	2.34772	1.13775
	YNL288W_106	4.93	4.879	7.3	7.3	2.34928	2.39196
	YNR055C_242	6.42	6.072	8.8	8	2.37077	1.97523
	YMR195W_13	4.88	4.744	7.3	7.3	2.37988	2.52563
	YNL307C_23	6.8	7.091	9.2	9.1	2.38039	1.97308
	YLL010C_65	4.69	4.321	7.1	5.9	2.38121	1.60217
	YGR038W_105	5.22	4.884	7.6	7.7	2.38768	2.8656
	YJR044C_43	4.77	4.871	7.2	7.4	2.38954	2.54731
	YNR069C_279	2.92	2.467	5.3	5	2.39238	2.58176
	YIL050W_22	4.22	3.972	6.6	6.3	2.39292	2.29912
	YNL291C_61	5.66	5.714	8.1	8.2	2.4095	2.53064
	YPL203W_43	5.42	5.358	7.8	7.6	2.4198	2.27633
	YNR051C_119	5.99	6.42	8.4	8.9	2.44261	2.51973
	YDL243C_457	2.74	3.015	5.2	5	2.45103	2.03344
	YNL066W_21	7.85	7.44	10.3	9.9	2.45694	2.49445
	YML106W_161	7.35	7.029	9.8	9.3	2.46717	2.24248
	YOL028C_94	3.22	3.243	5.7	4.5	2.47377	1.22104
	YNL066W_18	7.85	7.439	10.3	10	2.47763	2.51873
	YNL156C_43	5.49	5.86	8	8.6	2.48003	2.77384
	YNR051C_110	5.99	6.42	8.5	9	2.49271	2.62902
	YGL194C-A_55	3.08	2.761	5.6	4.5	2.52265	1.70237
	YBR192W_65	4.46	4.636	7	6	2.54445	1.41167
	YPL067C_3	3.38	2.83	5.9	5.8	2.54615	2.95553
	YJL164C_63	5.82	6.083	8.4	8.3	2.55558	2.18549
	YKL041W_54	3.86	3.67	6.4	6.2	2.55849	2.49326
	YLR229C_21	5.89	5.848	8.5	8.5	2.5603	2.65965
	YJR044C_37	4.77	4.871	7.3	7.6	2.56289	2.7631
	YOR152C_138	3.57	3.851	6.1	7.8	2.56424	3.93382
	YLR152C_109	4.13	4.447	6.7	6.8	2.56609	2.33592
	YOR247W_104	7.5	7.352	10.1	10.4	2.56659	3.04261
	YHR129C_62	3.78	3.476	6.4	6	2.5865	2.57261
	YHR129C_56	3.78	3.475	6.4	6.2	2.58671	2.68858
	YBR043C_85	4.82	4.928	7.4	7.8	2.59328	2.89287
	YNL291C_25	5.66	5.713	8.3	8.4	2.59432	2.70453
	YNL291C_22	5.66	5.713	8.3	8.4	2.60859	2.70473
	YGL256W_437	4.42	7.763	7.1	8.6	2.64267	0.811935
	YEL023C_104	3.67	3.713	6.3	7.4	2.64315	3.65747
	YBR125C_51	4.8	4.578	7.5	6.6	2.66125	2.05656
	YOL018C_22	4.26	4.516	6.9	7.1	2.66783	2.59182
	YDR121W_96	3.69	3.714	6.4	6.3	2.67422	2.55686
	YPL179W_83	6.2	6.212	8.9	9.3	2.67815	3.05981
	YPR085C_43	3.44	3.342	6.1	5	2.68929	1.7068
	YBR082C_45	6.63	6.514	9.3	9.7	2.69246	3.16912
	YDR387C_67	4.41	4.553	7.2	7.4	2.75536	2.86487
	YNR028W_50	4.49	4.432	7.3	7.4	2.75772	2.98627
	YML081C-A_40	4.52	4.257	7.3	6.7	2.75796	2.45439
	YPR109W_90	4.13	4.37	6.9	6.6	2.76071	2.26306
	YLR152C_97	4.13	4.447	6.9	7.1	2.76216	2.65839
	YDR357C_22	4.55	4.326	7.3	6.4	2.76228	2.04479
	YGL063W_129	2.93	2.685	5.7	5.3	2.77066	2.58569
	YNL191W_29	4.08	3.304	6.9	6.6	2.77745	3.24746
	YGR247W_100	3.76	3.52	6.6	6.3	2.79996	2.75122
	YPR036W-A_32	5.6	5.786	8.4	10.1	2.81476	4.29328
	YLR297W_64	2.59	3.069	5.4	6.3	2.83023	3.20152
	YPL148C_121	1.54	1.488	4.4	4	2.86916	2.55924
	YPL179W_47	6.2	6.212	9.1	9.4	2.90285	3.17142
	YNL066W_29	7.85	7.438	10.8	10.5	2.91894	3.06614
	YNL145W_11	6.3	6.925	9.2	9.4	2.91925	2.45869
	YLR242C_63	3.7	3.684	6.7	6.5	2.95387	2.7796
	YLR097C_50	3.82	4.357	6.8	5.6	2.95434	1.27649
	YPL177C_17	5.55	4.567	8.5	7.7	2.95463	3.183
	YGR181W_27	4.18	4.236	7.2	6.5	2.97955	2.22764
	YNL156C_16	5.49	5.861	8.5	9.1	2.98165	3.23233
	YLR016C_4	3.5	3.121	6.5	5.6	3.00949	2.51317
	YNL066W_5	7.85	7.439	10.9	10.6	3.03679	3.15111
	YIR031C_24	3.93	4.247	7	6.3	3.03722	2.02347
	YHR050W_115	5.79	5.558	8.8	9	3.03789	3.41339
	YMR010W_118	5.6	5.995	8.7	9.2	3.07975	3.24949
	YDR357C_13	4.55	4.328	7.6	7.1	3.08473	2.78008
	YIL119C_99	5.83	6.403	8.9	9.3	3.09029	2.90679
	YNR055C_197	6.42	6.066	9.5	9.5	3.11826	3.47467
	YNL156C_1	5.49	5.861	8.6	9.1	3.12378	3.28902
	YNL156C_4	5.49	5.861	8.6	9.1	3.12378	3.28902
	YLR453C_31	2.18	2.983	5.3	4	3.12892	1.06538
	YBR120C_21	3.06	3.404	6.2	4.8	3.1305	1.38196
	YPL177C_11	5.55	4.567	8.7	7.9	3.1502	3.32384
	YKL053C-A_11	4.1	4.716	7.3	7.2	3.1538	2.44851
	YGR267C_14	5.9	5.819	9.1	8.3	3.15766	2.47915
	YGR267C_8	5.9	5.819	9.1	8.3	3.16596	2.47913
	YLR040C_6	2.95	3.066	6.1	5.6	3.18466	2.56729
	YNL288W_73	4.93	4.878	8.1	8.4	3.18479	3.49226
	YKL183W_43	4.33	4.24	7.5	6.6	3.21848	2.39353
	YNL251C_53	6.12	6.135	9.3	9.6	3.22147	3.45675
	YHR043C_38	4.73	4.764	8	8.5	3.23476	3.76601
	YKL053C-A_42	4.1	4.715	7.3	7.8	3.23607	3.07043
	YHR059W_20	2.54	2.774	5.8	6.5	3.24374	3.68974
	YNL251C_47	6.12	6.135	9.4	9.7	3.25503	3.53713
	YNL288W_37	4.93	4.878	8.2	8.4	3.26204	3.56269
	YDL177C_36	2.43	2.168	5.8	4.5	3.34899	2.29571
	YOR180C_13	2.49	2.316	5.9	4.8	3.36826	2.46939
	YNL251C_14	6.12	6.134	9.5	9.8	3.36953	3.63245
	YGL032C_47	3.74	4.267	7.1	6.9	3.39316	2.59043
	YAR023C_971	1.99	2.049	5.4	3.5	3.42164	1.41469
	YEL039C_68	2.09	2.379	5.5	5.8	3.42187	3.40694
	YMR181C_25	2.54	3.63	6	5.9	3.46121	2.29387
	YJL139C_29	3.49	3.985	7	7.3	3.47267	3.286
	YMR034C_109	2.37	2.052	5.9	6	3.49162	3.99738
	YJL124C_53	5.22	5.023	8.8	8.2	3.53994	3.16977
	YMR166C_151	3.33	3.131	6.9	6.2	3.56029	3.03412
	YPL071C_30	2.98	2.615	6.6	6.3	3.6291	3.65567
	YNL024C-A_29	3.51	3.513	7.2	6.3	3.64918	2.75841
	YDR265W_39	3.47	3.258	7.1	7	3.66538	3.72953
	YER115C_10	3.1	3.147	6.8	6.6	3.67647	3.40399
	YLR037C_184	0.69	0.939	4.4	4.5	3.7224	3.52554
	YGR168C_16	3.44	3.605	7.2	7.1	3.7485	3.50256
	YMR166C_124	3.33	3.129	7.2	6.5	3.85946	3.33559
	YHR138C_2	3.17	3.834	7	6.5	3.86669	2.62924
	YAR023C_932	1.99	2.047	5.9	5.8	3.93623	3.73894
	YBR194W_17	1.85	2.117	5.9	5.6	4.07762	3.51713
	YGL146C_34	2.23	1.99	6.3	6.7	4.07976	4.72299
	YMR034C_102	2.36	2.052	6.5	6.2	4.10214	4.11287
	YIL059C_496	1.61	2.092	5.8	5.8	4.17632	3.69289
	YGR122C-A_56	1.37	0.774	5.7	5	4.32094	4.27555
	YPL096C-A_20	2.29	2.636	6.6	6.6	4.32374	3.91551
	YMR182C_31	-0.64	2.404	3.9	5.6	4.57263	3.23118
	YPL148C_93	1.54	1.517	6.3	5.9	4.76768	4.40479
	YGL032C_28	3.74	4.258	8.5	8	4.79991	3.69848
	YCR045W-A_84	1.51	1.299	6.4	6.9	4.85888	5.62497
	YIL029C_21	1.15	1.221	6.2	6	5.04411	4.8276
	YIL029C_12	1.15	1.222	6.3	6	5.15938	4.82678
	YMR148W_170	3.28	3.391	8.5	8.6	5.20098	5.15952
	YPL034W_33	2.56	2.618	7.8	7.2	5.231	4.59862
	YNL211C_28	1.63	1.794	7	6.8	5.4043	4.99239
	YDR133C_151	6.98	6.912	15.3	15	8.3217	8.11137
	YDR133C_85	6.98	6.912	15.9	15.7	8.88113	8.74501
	YDR133C_52	6.98	6.912	16	15.8	9.04146	8.91364
	YDR133C_4	6.98	6.912	16	15.8	9.04762	8.92409

## Sheet: Sheet 3
	uORF name	mrna30 (log2)	mrna37 (log2)	ribo30 (log2)	ribo37 (log2)	te30 (log2)	te37 (log2)
	YFR031C-A_8	10.84	10.19	4.4	2.94	-6.4203	-7.24455
	YPL090C_9	11.07	10.4	5	4.53	-6.0597	-5.87159
	YGL008C_217	13.07	12.98	7.1	5.75	-5.9762	-7.23171
	YLR044C_7	14.32	14.23	8.4	8.24	-5.941	-5.99517
	YAL005C_24	12.57	13.01	7.1	6.4	-5.4806	-6.60941
	YAL005C_17	12.57	13.01	7.3	6.75	-5.3199	-6.26182
	YAL005C_40	12.57	13.01	7.3	7.34	-5.2697	-5.66843
	YMR092C_51	7.56	7.67	2.4	-0.81	-5.1346	-8.478
	YLR342W_164	11.27	10.84	6.2	5.53	-5.0376	-5.31549
	YMR120C_18	9.46	6.98	4.5	-0.81	-5.0066	-7.78765
	YGR157W_92	9.37	9.01	4.4	2.94	-4.9467	-6.07041
	YDR293C_701	8.32	8.59	3.4	-0.81	-4.895	-9.40057
	YGR240C_211	10.71	10.12	5.9	3.94	-4.8315	-6.17278
	YFL018C_57	7.83	7.71	3	4.53	-4.8193	-3.18194
	YMR120C_12	9.46	6.98	4.8	-0.81	-4.6836	-7.78765
	YDL191W_3	9.79	9.44	5.1	4.53	-4.665	-4.9118
	YGR148C_115	9	8.36	4.4	3.94	-4.5709	-4.41805
	YGR192C_16	14.18	13.93	9.6	8.16	-4.5673	-5.77257
	YLR342W_190	11.27	10.84	6.8	5.27	-4.4873	-5.57804
	YJR009C_16	12.99	12.71	8.6	7.03	-4.377	-5.67645
	YDL185W_33	10.9	10.5	6.6	4.94	-4.3042	-5.55778
	YLR304C_19	10.3	9.63	6	4.94	-4.2944	-4.69117
	YOR136W_72	7.89	8.18	3.7	2.94	-4.1483	-5.24
	YDR293C_614	8.32	8.59	4.2	6.41	-4.0875	-2.18323
	YMR012W_74	9.52	8.98	5.5	4.94	-4.0037	-4.0412
	YLR291C_18	6.38	6.17	2.4	4.95	-3.9526	-1.22292
	YLR342W_177	11.27	10.84	7.4	6.12	-3.9145	-4.72751
	YJL041W_17	7.65	7.51	3.7	2.94	-3.9066	-4.5628
	YLR378C_147	8.29	7.97	4.4	-0.81	-3.8668	-8.78358
	YJL138C_13	10.79	10.43	6.9	5.53	-3.8391	-4.89802
	YMR108W_26	8.43	7.99	4.6	5.75	-3.8346	-2.24205
	YNL176C_147	5.21	5.43	1.4	4.53	-3.7892	-0.89978
	YKL056C_2	10.37	9.84	6.6	5.94	-3.7737	-3.89205
	YNL287W_79	8.64	8.47	4.9	3.94	-3.7585	-4.52444
	YGL008C_4	13.07	12.98	9.3	9.11	-3.7524	-3.86798
	YDR293C_602	8.32	8.59	4.6	6.41	-3.7247	-2.18311
	YCR012W_12	13.41	13.1	9.7	9.02	-3.7003	-4.07603
	YGR240C_78	10.71	10.12	7	4.53	-3.6746	-5.58751
	YEL027W_7	8.97	8.38	5.3	5.53	-3.6339	-2.85242
	YGR178C_188	7.64	7.58	4	4.53	-3.6328	-3.05221
	YJL002C_25	7.62	7.24	4	2.94	-3.6106	-4.30232
	YJL002C_42	7.62	7.24	4	2.94	-3.6106	-4.30232
	YAR015W_70	7.63	5.4	4	2.9	-3.5945	-2.49842
	YGR240C_49	10.71	10.12	7.1	6.85	-3.5895	-3.26646
	YDR172W_6	8.01	8.13	4.4	5.53	-3.5813	-2.60848
	YFL004W_19	7.58	7.17	4	4.94	-3.5689	-2.22731
	YIL053W_11	9.03	8.89	5.5	4.53	-3.5142	-4.36434
	YLR167W_41	11.57	10.76	8.1	7.27	-3.5036	-3.48417
	YMR300C_79	7.9	6.61	4.4	-0.81	-3.4652	-7.41551
	YPL048W_13	8.97	8.81	5.5	3.94	-3.4558	-4.86865
	YGR034W_13	9.46	8.64	6	6.11	-3.4492	-2.5251
	YGR240C_151	10.71	10.12	7.3	5.94	-3.4319	-4.17403
	YPR159W_159	8	8.06	4.6	3.94	-3.4103	-4.11577
	YIL069C_14	9.15	8.52	5.7	5.53	-3.4014	-2.99314
	YHR020W_4	9.13	8.86	5.7	5.75	-3.3842	-3.10345
	YGL206C_87	10.07	9.81	6.7	6.27	-3.36	-3.53974
	YPR181C_23	8.68	8.39	5.3	-0.81	-3.3506	-9.20369
	YDL055C_104	10.33	9.87	7	6.4	-3.3166	-3.4674
	YGR086C_67	8.99	8.89	5.7	6.26	-3.3163	-2.63117
	YDR293C_292	8.32	8.59	5	4.94	-3.3104	-3.64705
	YBR196C_22	11.36	11.05	8.1	6.75	-3.2803	-4.30627
	YLR167W_31	11.57	10.76	8.3	7.55	-3.2701	-3.20763
	YML070W_18	7.68	7.79	4.4	4.53	-3.2522	-3.25865
	YDL192W_2	8.8	8.42	5.6	5.27	-3.2012	-3.14612
	YML072C_154	9.48	9.25	6.3	5.75	-3.1997	-3.50263
	YPL154C_234	8.94	9.15	5.7	4.53	-3.1944	-4.6207
	YFR050C_37	6.61	6.61	3.4	-0.81	-3.1848	-7.41699
	YLR333C_81	8.58	8.19	5.4	5.53	-3.1543	-2.66111
	YOR153W_41	10.07	9.99	6.9	7.89	-3.1517	-2.09421
	YHR068W_13	7.71	7.3	4.6	4.94	-3.119	-2.35304
	YLR257W_10	6.52	6.59	3.4	4.53	-3.1	-2.06064
	YMR246W_106	8.1	8.57	5	6.53	-3.0893	-2.0433
	YBR218C_1	8.9	8.73	5.8	2.94	-3.0853	-5.78768
	YLR248W_7	6.83	6.47	3.7	2.94	-3.0843	-3.52289
	YIL069C_8	9.15	8.52	6.1	5.75	-3.0226	-2.77137
	YEL009C_322	8.51	8.47	5.5	5.94	-2.9973	-2.52863
	YLR167W_19	11.57	10.76	8.6	7.82	-2.9922	-2.93906
	YDL137W_22	7.56	7.02	4.6	5.94	-2.9605	-1.07483
	YLR028C_71	7.84	7.71	4.9	2.94	-2.9581	-4.76861
	YBL056W_2	7.19	6.81	4.2	2.94	-2.9575	-3.86481
	YGR034W_1	9.46	8.64	6.5	6.11	-2.9466	-2.52512
	YFL018C_53	7.83	7.71	4.9	5.27	-2.9452	-2.44384
	YDL126C_13	10.15	10	7.2	7.33	-2.9199	-2.66648
	YCR011C_82	7.45	7.49	4.6	-0.81	-2.8787	-8.29598
	YGL206C_81	10.07	9.81	7.2	6.4	-2.8639	-3.40256
	YMR189W_80	8.67	7.66	5.8	6.29	-2.8457	-1.36953
	YLR256W_47	8.43	8.3	5.6	5.27	-2.834	-3.03359
	YDL078C_28	6.58	6.18	3.7	4.53	-2.8331	-1.65604
	YBR127C_18	9.81	9.48	7	6.27	-2.8302	-3.21716
	YIL052C_15	9.06	8.44	6.2	4.94	-2.8284	-3.49612
	YNR001C_39	7.7	7.96	4.9	-0.81	-2.8179	-8.77276
	YGR240C_31	10.71	10.12	7.9	7.7	-2.8139	-2.41732
	YOR153W_14	10.07	9.99	7.3	8.11	-2.8104	-1.88175
	YBR196C_4	11.36	11.05	8.6	7.18	-2.7999	-3.86982
	YGR240C_141	10.71	10.12	7.9	7.11	-2.7977	-3.00426
	YJL052W_14	11.68	11.5	8.9	8.43	-2.7932	-3.07183
	YLR130C_7	7.22	7.32	4.4	4.94	-2.7922	-2.37574
	YLR342W_229	11.27	10.84	8.5	7.47	-2.7896	-3.3784
	YOR153W_2	10.07	9.99	7.3	8.11	-2.7854	-1.88179
	YOR273C_49	6.49	6.87	3.7	3.94	-2.7417	-2.93486
	YOR370C_293	6.75	6.7	4	5.27	-2.7398	-1.43737
	YCL030C_9	8.92	7.03	6.2	4.96	-2.7389	-2.07071
	YPL028W_48	8.47	8.18	5.7	5.26	-2.7224	-2.91416
	YOR153W_137	10.07	9.99	7.4	6.27	-2.7121	-3.72308
	YHR155W_8	6.13	6.69	3.4	2.94	-2.7062	-3.74151
	YFR009W_30	7.71	7.62	5	-0.81	-2.6981	-8.43226
	YCR088W_18	8.12	7.76	5.4	2.94	-2.6979	-4.81574
	YJL005W_81	8	8.13	5.3	5.75	-2.6661	-2.37729
	YGL207W_82	8.33	8.1	5.7	4.53	-2.6535	-3.57277
	YGL123W_77	10.98	10.14	8.3	7.4	-2.6534	-2.74339
	YGR253C_38	6.88	6.99	4.2	3.94	-2.6494	-3.05031
	YKL104C_138	8.31	8.06	5.7	-0.81	-2.6333	-8.87284
	YOR014W_208	7.05	6.86	4.4	4.94	-2.6295	-1.92246
	YKL056C_15	10.37	9.84	7.7	5.94	-2.6226	-3.89467
	YDR516C_20	6.85	7.16	4.2	3.94	-2.6142	-3.22409
	YBL022C_96	7.84	7.93	5.2	5.75	-2.6054	-2.18017
	YGR138C_176	6.82	7.59	4.2	5.94	-2.5884	-1.64449
	YLR340W_19	11.54	10.93	9	7.8	-2.5421	-3.12169
	YGR240C_126	10.71	10.12	8.2	7.33	-2.5349	-2.78208
	YPR019W_20	6.27	6.5	3.7	4.53	-2.5186	-1.97199
	YGR178C_160	7.64	7.58	5.1	5.53	-2.5174	-2.05308
	YMR012W_31	9.52	8.98	7	6.65	-2.5072	-2.33619
	YKL054C_96	8.02	8	5.5	3.94	-2.5069	-4.06111
	YLR300W_17	9.09	8.9	6.6	6.11	-2.4982	-2.78773
	YGL190C_366	5.9	6.21	3.4	3.94	-2.4767	-2.26924
	YBR283C_52	7.97	7.68	5.5	5.95	-2.4613	-1.73055
	YMR217W_7	8.78	8.43	6.3	5.94	-2.4502	-2.48706
	YEL063C_105	6.19	6.28	3.7	5.53	-2.4411	-0.75073
	YHR018C_8	7.19	7.06	4.7	3.94	-2.44	-3.12042
	YGR240C_114	10.71	10.12	8.3	7.4	-2.4319	-2.71528
	YER110C_34	9.37	9.1	6.9	5.94	-2.4269	-3.15653
	YAL026C_55	7.3	7.01	4.9	4.94	-2.4123	-2.06752
	YDR234W_11	6.41	6.52	4	3.94	-2.398	-2.57375
	YMR300C_55	7.9	6.6	5.5	-0.81	-2.3674	-7.4154
	YLR256W_174	8.43	8.3	6.1	7.03	-2.3602	-1.26992
	YNL055C_19	9.26	9.48	6.9	6.4	-2.3464	-3.08055
	YGL028C_9	6.75	7.23	4.4	3.94	-2.3259	-3.29183
	YBL022C_72	7.84	7.93	5.5	6.27	-2.3256	-1.66607
	YMR031C_54	7.06	6.9	4.7	4.53	-2.3108	-2.37151
	YGR178C_104	7.64	7.58	5.3	5.75	-2.3107	-1.83029
	YLR432W_20	9.12	9.01	6.8	5.53	-2.3068	-3.48044
	YDR225W_11	8.31	8.36	6	7.19	-2.3041	-1.1738
	YNL154C_182	6.69	6.25	4.4	3.94	-2.2698	-2.30383
	YBR069C_48	7.27	7.47	5	7.03	-2.265	-0.43852
	YLR167W_10	11.57	10.76	9.3	8.54	-2.2598	-2.21729
	YGL009C_51	9.14	7.91	6.9	3.94	-2.2558	-3.96629
	YER110C_72	9.37	9.1	7.1	5.53	-2.2486	-3.57443
	YLR120C_1	6.48	7.05	4.2	5.53	-2.2474	-1.52385
	YPR160W_298	7.84	8.85	5.6	7.2	-2.245	-1.64739
	YJL165C_9	5.99	6.13	3.7	5.75	-2.242	-0.38084
	YLR447C_20	8.05	7.89	5.8	5.75	-2.2379	-2.14391
	YGR229C_3	6.66	6.25	4.4	-0.81	-2.2376	-7.05599
	YLR109W_21	10.76	10.58	8.5	7.09	-2.2204	-3.49196
	YGR281W_89	7.23	7.37	5	4.53	-2.2157	-2.8419
	YHR115C_136	5.63	6.14	3.4	6.41	-2.2036	0.26795
	YGL207W_60	8.33	8.1	6.1	4.94	-2.1999	-3.15855
	YGR054W_75	7.2	7.23	5	5.26	-2.1943	-1.96691
	YDL122W_93	6.42	6.41	4.2	3.94	-2.1915	-2.4707
	YBL047C_115	8.52	8.63	6.3	5.95	-2.1865	-2.68211
	YGL049C_76	6.61	6.35	4.4	2.94	-2.1827	-3.40285
	YLR300W_61	9.09	8.9	6.9	7.4	-2.1767	-1.50019
	YCR088W_14	8.12	7.76	5.9	2.94	-2.1744	-4.81572
	YHR206W_464	5.59	5.86	3.4	2.94	-2.1683	-2.92045
	YMR309C_27	8.44	8.15	6.3	3.94	-2.1635	-4.21204
	YGL123W_63	10.98	10.14	8.8	6.91	-2.1596	-3.22737
	YOR370C_143	6.75	6.7	4.6	4.94	-2.1548	-1.75894
	YBR078W_58	10.45	9.87	8.3	8.03	-2.1456	-1.83745
	YLR300W_36	9.09	8.9	6.9	7.59	-2.1444	-1.31317
	YGL077C_140	7.65	7.44	5.5	4.94	-2.1425	-2.49515
	YMR291W_26	6.13	6.31	4	3.95	-2.1186	-2.35698
	YHR190W_18	7.34	7.44	5.2	4.53	-2.1107	-2.91292
	YNR001C_33	7.7	7.96	5.6	4.94	-2.1076	-3.0215
	YGR281W_82	7.23	7.37	5.1	4.94	-2.1001	-2.42647
	YNL154C_170	6.69	6.25	4.6	4.53	-2.1	-1.71928
	YNL068C_24	5.52	5.91	3.4	4.94	-2.0986	-0.97301
	YCL037C_41	7.77	7.86	5.7	6.11	-2.097	-1.74213
	YJR045C_77	10.5	10.36	8.4	7.84	-2.0967	-2.52168
	YPR160W_276	7.84	8.85	5.7	7.11	-2.0949	-1.7337
	YDR293C_279	8.32	8.59	6.2	6.53	-2.0881	-2.06159
	YMR246W_183	8.1	8.57	6	6.75	-2.0881	-1.82951
	YEL034W_34	10.26	9.72	8.2	6.72	-2.0823	-2.99773
	YER056C_68	7.57	7.22	5.5	4.94	-2.0588	-2.27942
	YLR450W_24	6.94	6.56	4.9	2.94	-2.0562	-3.61934
	YGL203C_39	6.26	6.26	4.2	-0.81	-2.0311	-7.0748
	YDL224C_106	6.04	5.85	4	2.94	-2.0292	-2.90609
	YKL100C_1	6.45	6.45	4.4	5.53	-2.0292	-0.92509
	YPR010C_22	9	8.83	7	6.93	-2.0187	-1.89848
	YPR145W_3	8.48	8.19	6.5	5.53	-2.013	-2.66094
	YEL009C_179	8.51	8.47	6.5	4.53	-1.9991	-3.94362
	YLR179C_46	7.42	7.45	5.4	4.94	-1.9966	-2.50624
	YLR372W_127	7.59	7.29	5.6	4.53	-1.9907	-2.76097
	YPR010C_19	9	8.83	7	6.93	-1.9885	-1.89848
	YOR341W_87	9.45	9.15	7.5	5.95	-1.9788	-3.19589
	YLR355C_24	10.22	9.8	8.2	7.47	-1.9781	-2.33875
	YHR205W_330	6.72	6.75	4.7	4.53	-1.9719	-2.22407
	YNL291C_184	5.71	5.59	3.7	3.94	-1.9659	-1.64844
	YGL167C_320	7.78	7.76	5.8	5.94	-1.9632	-1.827
	YOL126C_35	5.38	5.04	3.4	-0.81	-1.9545	-5.84604
	YGR180C_5	8.63	8.96	6.7	6.75	-1.954	-2.2047
	YMR031C_48	7.06	6.9	5.1	4.53	-1.9321	-2.37149
	YGL022W_43	8.47	8.27	6.6	6.64	-1.9155	-1.62834
	YHR030C_175	5.91	6.24	4	2.94	-1.9044	-3.29748
	YBR086C_122	8.07	7.57	6.2	5.75	-1.8947	-1.81694
	YDR033W_93	10.11	9.79	8.2	7.26	-1.8946	-2.53053
	YDR502C_22	8.31	7.38	6.4	5.26	-1.8871	-2.11278
	YHR143W_236	7.01	7.43	5.1	2.94	-1.8866	-4.48426
	YDL160C_185	7.7	7.87	5.8	5.75	-1.8787	-2.1182
	YGR054W_148	7.2	7.23	5.3	3.94	-1.8726	-3.28857
	YGL202W_51	8.41	8.12	6.6	7.19	-1.8591	-0.92415
	YFL039C_40	11.08	10.61	9.2	7.75	-1.8466	-2.86479
	YBR039W_49	7.07	6.61	5.2	-0.81	-1.8346	-7.42165
	YOR117W_67	6.96	6.72	5.1	3.94	-1.8323	-2.77945
	YLL013C_109	7.05	7.03	5.2	-0.81	-1.8213	-7.8434
	YNL154C_53	6.69	6.25	4.9	-0.81	-1.81	-7.0573
	YDL224C_330	6.04	5.85	4.2	4.94	-1.8069	-0.90436
	YOR116C_4	7.87	7.82	6.1	6.27	-1.7983	-1.54781
	YBR263W_10	8.21	7.66	6.4	5.26	-1.7879	-2.39064
	YMR261C_17	7.85	7.95	6.1	5.26	-1.7873	-2.69306
	YPL125W_27	6.38	6.65	4.6	5.53	-1.7811	-1.1205
	YDL234C_35	5.2	5.51	3.4	2.94	-1.7719	-2.57211
	YBR069C_39	7.27	7.47	5.5	7.64	-1.7631	0.17322
	YNL134C_7	7.77	6.3	6	4.53	-1.7601	-1.76921
	YNR001C_4	7.7	7.96	5.9	5.26	-1.7537	-2.70071
	YDL132W_73	6.75	7.11	5	5.95	-1.743	-1.16217
	YFR050C_18	6.61	6.61	4.9	-0.81	-1.7251	-7.41696
	YJR045C_85	10.5	10.36	8.8	8.07	-1.7176	-2.2941
	YGL009C_33	9.14	7.91	7.4	5.94	-1.715	-1.96597
	YDL055C_91	10.33	9.87	8.6	7.52	-1.7047	-2.34646
	YFL018C_36	7.83	7.71	6.1	6.11	-1.7039	-1.59752
	YPL273W_51	6.82	6.52	5.1	4.53	-1.6977	-1.99485
	YHR007C_43	8.56	8.72	6.9	6.85	-1.6805	-1.87585
	YDL122W_84	6.42	6.41	4.7	5.26	-1.6771	-1.15126
	YKL104C_120	8.31	8.06	6.6	4.94	-1.6727	-3.12122
	YJR143C_30	8.34	8.15	6.7	6.85	-1.6697	-1.29588
	YKL142W_2	6.41	6.7	4.7	3.94	-1.6641	-2.75931
	YEL036C_85	6.26	6.31	4.6	2.94	-1.664	-3.36649
	YEL036C_125	6.26	6.31	4.6	5.53	-1.6632	-0.77866
	YOL139C_32	7.79	7.32	6.1	5.75	-1.6622	-1.57549
	YNL294C_111	5.07	5.53	3.4	2.94	-1.6489	-2.59044
	YDR343C_22	8.32	9.31	6.7	7.72	-1.6483	-1.58562
	YHR007C_40	8.56	8.72	6.9	6.94	-1.6482	-1.78332
	YGL077C_133	7.65	7.44	6	5.26	-1.6447	-2.17181
	YKL096W_25	7.65	8.79	6	3.94	-1.64	-4.84588
	YFL005W_5	6.52	6.26	4.9	3.94	-1.6351	-2.32051
	YGR281W_189	7.23	7.37	5.6	-0.81	-1.631	-8.17987
	YLR430W_47	7.57	7.75	5.9	3.94	-1.6232	-3.80874
	YNL016W_15	8.4	7.92	6.8	7.27	-1.6215	-0.65114
	YPR105C_7	6.04	6.3	4.4	5.94	-1.619	-0.36361
	YDL224C_59	6.04	5.85	4.4	4.53	-1.6142	-1.32202
	YGL040C_34	6.62	6.55	5	6.26	-1.6127	-0.28065
	YDR072C_92	5.61	5.6	4	4.53	-1.6028	-1.07489
	YDR502C_13	8.31	7.38	6.7	6.26	-1.6014	-1.11433
	YAL049C_29	5.61	5.68	4	2.94	-1.5967	-2.73513
	YML075C_42	6.82	6.79	5.2	5.53	-1.5845	-1.26418
	YDL055C_71	10.33	9.87	8.7	8.26	-1.5801	-1.6066
	YMR230W_12	8.05	7.67	6.5	4.94	-1.5801	-2.7249
	YCR002C_23	6.17	5.94	4.6	-0.81	-1.5748	-6.75353
	YNL287W_10	8.64	8.47	7.1	6.85	-1.5745	-1.61364
	YDR382W_58	9.27	8.38	7.7	6.26	-1.564	-2.11422
	YMR305C_93	8.11	7.56	6.6	6.75	-1.5598	-0.81339
	YMR243C_25	7.56	7.33	6	5.26	-1.5475	-2.06827
	YBR133C_94	6.43	6.29	4.9	4.94	-1.5461	-1.34666
	YGR191W_162	6.66	6.37	5.1	5.53	-1.539	-0.84757
	YGR229C_253	6.66	6.25	5.1	5.52	-1.5377	-0.72072
	YDR226W_7	8.77	8.63	7.2	5.75	-1.536	-2.88478
	YOR335C_48	9.36	8.7	7.8	6.85	-1.5314	-1.85369
	YMR183C_48	6.54	6.14	5	-0.81	-1.5307	-6.94552
	YDL055C_68	10.33	9.87	8.8	8.3	-1.5271	-1.5713
	YGL030W_38	9.69	9.09	8.2	8.08	-1.527	-1.01213
	YOR184W_55	8.08	6.95	6.6	6.11	-1.5265	-0.83869
	YMR054W_32	7.04	6.98	5.5	3.94	-1.5244	-3.04009
	YPR149W_64	8.38	8.38	6.9	5.75	-1.5244	-2.62782
	YBR221C_88	8.3	7.72	6.8	4.94	-1.5207	-2.77371
	YDR505C_135	6.64	7.02	5.1	-0.81	-1.5151	-7.8272
	YDR505C_191	6.64	7.02	5.1	6.65	-1.5151	-0.37109
	YMR216C_64	6.74	6.85	5.2	6.64	-1.5127	-0.21258
	YBL045C_56	7.18	7.26	5.7	5.75	-1.5108	-1.51047
	YDR293C_152	8.32	8.59	6.8	5.75	-1.5019	-2.83896
	YMR309C_9	8.44	8.15	6.9	5.26	-1.5001	-2.89612
	YOR124C_63	7.32	7.34	5.8	2.94	-1.4999	-4.40129
	YKR026C_80	5.24	4.84	3.7	-0.81	-1.4985	-5.64573
	YPR165W_159	7.31	6.65	5.8	5.26	-1.4947	-1.38689
	YCR030C_66	6.61	6.41	5.1	-0.81	-1.49	-7.22186
	YGL009C_23	9.14	7.91	7.7	6.11	-1.4867	-1.7964
	YLR190W_86	6.6	6.57	5.1	4.94	-1.4711	-1.62682
	YLR375W_18	5.7	6.33	4.2	6.27	-1.4686	-0.06522
	YDL160C_144	7.7	7.87	6.2	6.74	-1.4643	-1.12357
	YGR178C_68	7.64	7.58	6.2	6.64	-1.463	-0.93501
	YMR086W_28	6.21	6	4.7	4.95	-1.4588	-1.05771
	YOR270C_39	9.39	9.38	7.9	8.23	-1.4541	-1.14984
	YLR347C_28	8	8.31	6.6	6.75	-1.4499	-1.55914
	YDR434W_75	5.86	5.95	4.4	2.94	-1.4341	-3.00882
	YMR136W_39	5.44	5.74	4	5.96	-1.4306	0.21606
	YOR316C_83	5.44	5.92	4	4.53	-1.4271	-1.38857
	YBR049C_62	6.31	6.34	4.9	2.94	-1.4251	-3.39896
	YBR276C_35	6.28	6.25	4.9	3.87	-1.4229	-2.37802
	YDR368W_28	7.02	6.94	5.6	4.94	-1.421	-2.00304
	YJL167W_31	8.15	7.83	6.7	4.94	-1.4063	-2.88358
	YKR080W_23	7.44	6.53	6	-0.81	-1.4043	-7.34267
	YDR251W_52	6.63	6.37	5.2	3.94	-1.4	-2.42815
	YMR212C_113	6.28	6.33	4.9	3.94	-1.3983	-2.39121
	YLR359W_63	8.52	6.98	7.1	7.36	-1.3928	0.38289
	YBR221C_85	8.3	7.72	6.9	4.94	-1.3867	-2.77372
	YPL037C_12	8.89	8.41	7.5	6.64	-1.3792	-1.76933
	YPR024W_135	7.18	7.45	5.8	6.11	-1.3667	-1.3365
	YPR149W_36	8.38	8.38	7	7.59	-1.3663	-0.78989
	YDL160C_244	7.7	7.87	6.3	6.27	-1.3642	-1.60308
	YOR261C_11	6.95	6.66	5.6	5.75	-1.3542	-0.90914
	YNL091W_104	6.94	7.1	5.6	3.94	-1.3494	-3.15417
	YJL174W_98	6.68	6.73	5.3	4.94	-1.3487	-1.79044
	YPL260W_25	6.35	6.44	5	4.94	-1.3446	-1.49667
	YPR161C_48	5.57	5.81	4.2	3.94	-1.3367	-1.8679
	YGR090W_101	7.46	7.51	6.1	7.52	-1.3362	0.00564
	YKL126W_155	6.85	6.99	5.5	5.94	-1.3348	-1.04422
	YEL009C_292	8.51	8.47	7.2	7.26	-1.3291	-1.20703
	YNL283C_326	5.75	5.37	4.4	4.53	-1.3211	-0.84329
	YFL018C_29	7.83	7.71	6.5	6.4	-1.3169	-1.30884
	YHR098C_34	7.69	7.53	6.4	6.11	-1.3128	-1.42329
	YEL050C_16	5.54	5.52	4.2	5.26	-1.3078	-0.25102
	YLL019C_470	5.9	6.26	4.6	5.53	-1.3068	-0.73056
	YMR308C_84	8.28	8.32	7	5.94	-1.302	-2.37998
	YBR049C_110	6.31	6.34	5	3.94	-1.3001	-2.40016
	YDR206W_40	6.3	6.44	5	3.94	-1.2907	-2.50255
	YML128C_41	6.18	7.17	4.9	5.96	-1.2885	-1.21387
	YNL287W_29	8.64	8.47	7.4	7.19	-1.2872	-1.27355
	YPR156C_246	7.1	7.46	5.8	5.75	-1.2868	-1.71103
	YOL040C_36	9.98	9.22	8.7	7.9	-1.2769	-1.32608
	YHR165C_31	8.06	8.12	6.8	6.64	-1.2767	-1.48274
	YGL049C_29	6.61	6.35	5.3	3.94	-1.2757	-2.40333
	YLR130C_94	7.22	7.32	5.9	4.94	-1.2683	-2.37572
	YDL171C_81	10	9.42	8.7	8.12	-1.2676	-1.30109
	YGL202W_95	8.41	8.12	7.2	6.75	-1.2602	-1.36597
	YGL009C_17	9.14	7.91	7.9	6.27	-1.2561	-1.64506
	YGR054W_28	7.2	7.23	5.9	5.94	-1.2559	-1.2908
	YJL158C_2	9.03	8.88	7.8	7.26	-1.2526	-1.623
	YDR293C_557	8.32	8.59	7.1	8.03	-1.2495	-0.55732
	YLR286C_50	9.02	9.24	7.8	9.47	-1.2407	0.22773
	YLR187W_46	5.47	5.9	4.2	5.75	-1.2399	-0.15029
	YKR080W_13	7.44	6.53	6.2	-0.81	-1.2335	-7.34267
	YKL046C_108	6.45	6.44	5.2	5.26	-1.2193	-1.17477
	YDR505C_167	6.64	7.02	5.4	6.65	-1.2154	-0.37111
	YBL047C_68	8.52	8.63	7.3	6.26	-1.21	-2.36314
	YPL023C_112	5.95	5.86	4.7	4.52	-1.205	-1.33421
	YLR208W_61	7.15	6.96	5.9	3.94	-1.2038	-3.02047
	YEL009C_140	8.51	8.47	7.3	6.4	-1.2036	-2.07279
	YLR208W_19	7.15	6.96	5.9	4.94	-1.2035	-2.01883
	YPL053C_39	6.09	6.12	4.9	3.94	-1.203	-2.17459
	YER118C_155	5.21	5.07	4	4.53	-1.2024	-0.54157
	YBR085C-A_7	6.08	7.37	4.9	6.75	-1.1985	-0.62547
	YFR053C_31	9.04	9.59	7.8	7.56	-1.1977	-2.03322
	YOL158C_42	6.2	6.8	5	6.53	-1.1944	-0.26819
	YLR286C_44	9.02	9.24	7.9	9.5	-1.1718	0.25947
	YHR030C_107	5.91	6.24	4.7	4.94	-1.1676	-1.29571
	YHR183W_30	9.65	9.31	8.5	7.7	-1.1619	-1.6098
	YDR169C_208	4.91	5.19	3.7	4.53	-1.1603	-0.66259
	YPR163C_45	8.17	7.73	7	4.94	-1.1569	-2.79251
	YAR014C_21	6.16	5.88	5	3.94	-1.1527	-1.9368
	YER056C_13	7.57	7.22	6.4	5.93	-1.1474	-1.28181
	YER056C_56	7.57	7.22	6.4	5.53	-1.147	-1.69028
	YGR086C_50	8.99	8.89	7.9	7.89	-1.1382	-1.0049
	YGR054W_127	7.2	7.23	6.1	4.94	-1.1358	-2.28761
	YCR053W_9	8.62	8.34	7.5	6.75	-1.1274	-1.59285
	YFR053C_74	9.04	9.59	7.9	7.01	-1.1237	-2.57921
	YDR251W_133	6.63	6.37	5.5	4.53	-1.1209	-1.84123
	YBR164C_68	5.71	5.41	4.6	4.53	-1.1195	-0.88688
	YHR183W_27	9.65	9.31	8.5	7.9	-1.1193	-1.41004
	YDR293C_546	8.32	8.59	7.2	7.7	-1.1125	-0.89455
	YKL126W_67	6.85	6.99	5.7	6.64	-1.1002	-0.34473
	YER107C_139	5.33	5.15	4.2	2.94	-1.099	-2.21288
	YGL049C_125	6.61	6.35	5.5	4.53	-1.0952	-1.81773
	YBL047C_85	8.52	8.63	7.4	6.27	-1.0929	-2.35897
	YEL009C_162	8.51	8.47	7.4	6.63	-1.0876	-1.83595
	YPR149W_99	8.38	8.38	7.3	6.11	-1.0691	-2.2696
	YNL197C_226	5.95	6.21	4.9	5.75	-1.0681	-0.46604
	YNL294C_157	5.07	5.53	4	4.53	-1.0646	-1.00328
	YHL020C_30	5.65	5.4	4.6	4.53	-1.0581	-0.86918
	YMR308C_110	8.28	8.32	7.2	7.7	-1.0489	-0.62409
	YNR018W_3	5.93	6.33	4.9	5.27	-1.0455	-1.06511
	YHR205W_68	6.72	6.75	5.7	5.53	-1.0445	-1.22311
	YDR164C_22	5.27	5.31	4.2	3.94	-1.0415	-1.36791
	YDR284C_103	5.27	5.49	4.2	3.94	-1.0353	-1.54761
	YBR086C_110	8.07	7.57	7	6.27	-1.0344	-1.30277
	YNL263C_108	5.78	5.97	4.7	2.94	-1.0337	-3.02454
	YLR372W_121	7.59	7.29	6.6	6.4	-1.0315	-0.88577
	YGL035C_106	5.25	5.7	4.2	2.94	-1.0215	-2.75778
	YMR264W_17	5.44	5.5	4.4	5.27	-1.0181	-0.23908
	YBR149W_16	7.24	7.3	6.2	6.11	-1.0069	-1.19544
	YDR225W_25	8.31	8.36	7.3	6.85	-1.0067	-1.51408
	YLR432W_76	9.12	9.01	8.1	6.26	-0.9986	-2.74451
	YNR044W_12	5.4	4.17	4.4	6.64	-0.9738	2.46972
	YOR153W_112	10.07	9.99	9.1	8.3	-0.9728	-1.69347
	YHR161C_11	5.72	5.84	4.7	4.53	-0.9693	-1.31353
	YER165W_34	9.92	9.15	9	7.26	-0.9656	-1.88907
	YMR243C_30	7.56	7.33	6.6	6.11	-0.9622	-1.22163
	YHR183W_22	9.65	9.31	8.7	8.03	-0.9519	-1.27573
	YBR158W_217	7.13	7.33	6.2	6.64	-0.9507	-0.69061
	YKL171W_60	4.94	5.36	4	4.94	-0.9314	-0.41833
	YGL167C_17	7.78	7.76	6.9	6.12	-0.929	-1.64955
	YMR216C_104	6.74	6.85	5.8	6.75	-0.9276	-0.09969
	YDL155W_102	5.35	5.52	4.4	5.26	-0.9256	-0.25183
	YBL057C_3	4.67	5.04	3.7	-0.81	-0.9204	-5.85363
	YNL289W_24	5.15	5.33	4.2	-0.81	-0.9194	-6.13817
	YPR119W_185	6.15	5.87	5.2	2.94	-0.9175	-2.92203
	YGR229C_193	6.66	6.25	5.7	3.94	-0.9165	-2.30366
	YOR298C-A_22	8.2	8.5	7.3	5.53	-0.9163	-2.97801
	YLR079W_15	5.14	5.4	4.2	6.26	-0.9126	0.8613
	YAL017W_44	7.04	7.31	6.1	5.95	-0.9119	-1.35911
	YHL020C_27	5.65	5.4	4.7	4.53	-0.9059	-0.86908
	YDR162C_96	3.33	3.68	2.4	3.94	-0.901	0.26067
	YGL167C_88	7.78	7.76	6.9	6.75	-0.8961	-1.01885
	YHR007C_96	8.56	8.72	7.7	7.33	-0.894	-1.39017
	YGL190C_260	5.9	6.21	5	2.94	-0.8918	-3.27013
	YGL190C_358	5.9	6.21	5	5.75	-0.8916	-0.46222
	YOL123W_304	7.31	7.05	6.4	6.85	-0.8893	-0.20062
	YPL145C_146	6.96	6.76	6.1	5.26	-0.8891	-1.49973
	YNL189W_154	7.73	7.63	6.9	7.41	-0.879	-0.21963
	YNL131W_12	6.21	6.07	5.3	3.94	-0.8774	-2.12362
	YDR214W_25	6.94	7.88	6.1	7.76	-0.8734	-0.1203
	YGL094C_165	6.47	6.73	5.6	6.11	-0.8707	-0.62232
	YPR191W_17	6.94	6.96	6.1	2.94	-0.8706	-4.01288
	YDR293C_437	8.32	8.59	7.4	7.26	-0.8704	-1.32845
	YLR432W_33	9.12	9.01	8.3	6.26	-0.8663	-2.74394
	YPL125W_120	6.38	6.65	5.5	4.94	-0.8642	-1.70903
	YDL131W_1	7.57	8.11	6.7	6.53	-0.8632	-1.58003
	YDR298C_106	6.53	5.9	5.7	-0.81	-0.8607	-6.7122
	YHR131C_47	5.28	5.35	4.4	6.11	-0.86	0.76589
	YDR481C_22	6.45	6.79	5.6	6.11	-0.858	-0.68064
	YEL063C_84	6.19	6.28	5.3	6.27	-0.8561	-0.01223
	YKL181W_136	7.64	7.09	6.8	5.26	-0.8548	-1.82725
	YBL045C_90	7.18	7.26	6.3	6.53	-0.852	-0.73207
	YHL034C_20	7.56	6.95	6.7	2.94	-0.8491	-4.00373
	YOR124C_57	7.32	7.34	6.5	2.94	-0.8477	-4.40129
	YDR303C_189	6.18	6.44	5.3	6.11	-0.8447	-0.32959
	YHR084W_232	5.73	5.28	4.9	3.94	-0.842	-1.33684
	YDR062W_52	7.21	7.01	6.4	6.64	-0.8263	-0.36804
	YLR430W_192	7.57	7.75	6.7	8.34	-0.8247	0.59187
	YDL081C_16	9.4	8.53	8.6	8.58	-0.8242	0.05318
	YNL091W_91	6.94	7.1	6.1	3.94	-0.8189	-3.15416
	YPR119W_113	6.15	5.87	5.3	3.94	-0.8181	-1.92253
	YDR372C_182	6.24	5.86	5.4	5.27	-0.8175	-0.58941
	YHL034C_17	7.56	6.95	6.7	2.94	-0.8127	-4.00375
	YIL038C_221	6.32	6.22	5.5	6.54	-0.8097	0.31818
	YBR006W_53	4.55	5.31	3.7	5.26	-0.8046	-0.04838
	YDL132W_198	6.75	7.11	5.9	7.27	-0.8036	0.16031
	YBR014C_80	4.81	5.02	4	2.94	-0.7961	-2.07649
	YNR012W_32	4.79	4.89	4	3.94	-0.7807	-0.94444
	YGR191W_140	6.66	6.37	5.9	6.41	-0.7801	0.03567
	YOR161C_91	6.2	6.82	5.4	4.94	-0.7749	-1.879
	YPR053C_55	5.66	5.07	4.9	5.26	-0.7728	0.19389
	YPL184C_207	7.1	6.73	6.3	5.75	-0.7688	-0.98497
	YLR440C_38	5.51	5.53	4.7	-0.81	-0.7613	-6.34294
	YPL135W_50	5.19	5.87	4.4	3.94	-0.7607	-1.92875
	YPL273W_35	6.82	6.52	6.1	5.26	-0.7548	-1.25763
	YAL040C_198	6.18	6.12	5.4	5.27	-0.7544	-0.855
	YGL019W_33	5.87	5.75	5.1	5.94	-0.7432	0.18666
	YOR157C_36	6.62	6.59	5.9	5.75	-0.7396	-0.83923
	YLR414C_46	5.62	6.02	4.9	4.94	-0.7386	-1.08148
	YKR042W_187	9.77	9.66	9	8.49	-0.7348	-1.16612
	YMR238W_41	6.15	5.72	5.4	6.53	-0.7292	0.81135
	YNL007C_26	7.44	7.32	6.7	7.19	-0.7282	-0.12309
	YGR189C_36	7.93	8.52	7.2	6.64	-0.7247	-1.88546
	YGL049C_119	6.61	6.35	5.9	5.53	-0.7233	-0.81593
	YDL015C_37	6.9	6.85	6.2	4.53	-0.7228	-2.32356
	YJL162C_23	3.73	4.26	3	4.52	-0.7193	0.25896
	YDR394W_58	6.73	7.02	6	5.53	-0.718	-1.4905
	YBR067C_7	8.07	8.25	7.4	7.84	-0.7149	-0.41598
	YBL045C_106	7.18	7.26	6.5	5.53	-0.7146	-1.73145
	YEL023C_173	3.72	3.79	3	5.54	-0.7139	1.74394
	YGL167C_70	7.78	7.76	7.1	6.75	-0.7115	-1.01883
	YHR206W_350	5.59	5.86	4.9	5.53	-0.7083	-0.33565
	YOR043W_218	5.83	5.7	5.1	2.94	-0.708	-2.76204
	YNL064C_134	8.3	8.32	7.6	7.59	-0.7073	-0.73178
	YIL002C_64	5.59	5.57	4.9	5.26	-0.7045	-0.3069
	YLL039C_46	8.36	9.92	7.7	9.21	-0.7015	-0.70453
	YDL160C_237	7.7	7.87	7	7.19	-0.6862	-0.67704
	YGR245C_59	6.36	5.86	5.7	4.52	-0.686	-1.3364
	YGL167C_155	7.78	7.76	7.1	7.76	-0.6822	-0.00799
	YPL154C_33	8.94	9.15	8.3	8.5	-0.68	-0.6512
	YOL036W_63	6.19	6.76	5.5	6.4	-0.6796	-0.35264
	YPL184C_364	7.1	6.73	6.4	5.75	-0.6761	-0.98181
	YGR119C_43	6.18	6.11	5.5	5.53	-0.6727	-0.5805
	YBR221C_49	8.3	7.72	7.6	7.19	-0.669	-0.52705
	YGL049C_110	6.61	6.35	5.9	6.27	-0.6593	-0.07969
	YNL027W_40	5.08	5.34	4.4	2.94	-0.658	-2.39561
	YGR218W_159	8.33	8.18	7.7	7.2	-0.6556	-0.9788
	YER148W_167	6.17	5.92	5.5	5.27	-0.6538	-0.64974
	YDR293C_519	8.32	8.59	7.7	7.9	-0.6466	-0.69456
	YMR308C_33	8.28	8.32	7.6	6.85	-0.6466	-1.47147
	YDL188C_145	6.59	6.44	5.9	5.53	-0.6394	-0.91018
	YFL039C_97	11.08	10.61	10.4	8.87	-0.6352	-1.74586
	YDR395W_75	7.54	7.6	6.9	5.74	-0.6316	-1.85902
	YNL064C_131	8.3	8.32	7.7	7.65	-0.6293	-0.67564
	YLL039C_34	8.36	9.92	7.7	9.3	-0.6263	-0.61646
	YGR188C_27	4.05	4.24	3.4	4.53	-0.6256	0.29065
	YML106W_246	7.4	6.77	6.8	6.11	-0.6225	-0.65923
	YPL023C_98	5.95	5.86	5.3	5.26	-0.6194	-0.59422
	YEL002C_7	7.25	7.02	6.6	6.27	-0.618	-0.7521
	YKL125W_24	5.04	5.38	4.4	4.53	-0.6163	-0.85176
	YJL174W_88	6.68	6.73	6.1	5.27	-0.6115	-1.46904
	YPL256C_125	6.56	6.36	5.9	6.64	-0.6115	0.28502
	YLL039C_19	8.36	9.92	7.7	9.35	-0.6083	-0.56618
	YDR346C_76	7.12	6.62	6.5	4.53	-0.6059	-2.09545
	YJL128C_141	5.94	6.28	5.3	4.94	-0.604	-1.33877
	YDR072C_76	5.61	5.6	5	6.4	-0.6029	0.80008
	YMR083W_5	8.58	8.47	8	7.33	-0.6025	-1.13435
	YPL207W_37	6.48	6.17	5.9	-0.81	-0.5965	-6.98517
	YDL089W_256	4.61	4.66	4	3.94	-0.596	-0.72093
	YGR191W_189	6.66	6.37	6.1	3.94	-0.5954	-2.43014
	YHR104W_42	6.77	7.33	6.2	5.54	-0.5877	-1.78988
	YOR116C_116	7.87	7.82	7.3	7.53	-0.5848	-0.28664
	YGL022W_31	8.47	8.27	7.9	7.11	-0.5686	-1.16025
	YKL009W_4	5.45	5.09	4.9	5.53	-0.5665	0.44036
	YER089C_276	7.08	6.48	6.5	5.52	-0.563	-0.95666
	YPR161C_24	5.57	5.81	5	5.53	-0.5592	-0.28269
	YPR124W_40	7.98	8.27	7.4	6.65	-0.5566	-1.62652
	YPR124W_50	7.98	8.27	7.4	6.11	-0.5558	-2.16441
	YBR029C_53	6.62	6.63	6.1	6.11	-0.5553	-0.51914
	YGR229C_241	6.66	6.25	6.1	5.75	-0.537	-0.49876
	YBR015C_66	7.25	7.19	6.7	6.65	-0.5369	-0.54029
	YBR078W_123	10.45	9.87	9.9	8.69	-0.5334	-1.17159
	YGR054W_86	7.2	7.23	6.7	5.26	-0.5316	-1.96691
	YGR054W_89	7.2	7.23	6.7	4.94	-0.5316	-2.28848
	YJL176C_8	5.96	5.9	5.4	5.53	-0.5311	-0.37429
	YGR024C_30	4.93	5.04	4.4	5.86	-0.5288	0.8178
	YDR310C_110	6.59	6.7	6.1	4.53	-0.5238	-2.17104
	YHR039C_8	7.04	6.62	6.5	6.65	-0.5238	0.03237
	YNL307C_114	6.85	6.28	6.3	6.65	-0.5212	0.36328
	YDR284C_75	5.27	5.49	4.7	3.94	-0.521	-1.54792
	YBR086C_229	8.07	7.57	7.6	6.85	-0.5199	-0.71591
	YOR245C_163	4.53	4.69	4	3.94	-0.5166	-0.74659
	YOL111C_24	4.94	4.69	4.4	-0.81	-0.5142	-5.49755
	YKL054C_63	8.02	8	7.5	7.8	-0.5074	-0.20282
	YDL190C_46	6.74	6.76	6.2	6.41	-0.5039	-0.34959
	YGL123W_47	10.98	10.14	10.5	9.74	-0.4988	-0.40429
	YDR349C_43	5.92	6.07	5.4	3.94	-0.4979	-2.12551
	YLR414C_18	5.62	6.02	5.1	5.94	-0.4969	-0.0841
	YLR256W_116	8.43	8.3	7.9	7.9	-0.4945	-0.40339
	YKL080W_28	8.31	7.96	7.8	7.39	-0.4921	-0.56757
	YGR138C_171	6.82	7.59	6.3	8.44	-0.4891	0.84868
	YHR007C_63	8.56	8.72	8.1	7.99	-0.487	-0.72878
	YKL004W_110	6.55	6.36	6.1	7.11	-0.4869	0.75499
	YNL064C_162	8.3	8.32	7.8	7.94	-0.4836	-0.37904
	YDL072C_41	6.36	6.49	5.9	5.26	-0.4769	-1.22487
	YGR245C_32	6.36	5.86	5.9	4.52	-0.4756	-1.33658
	YNL190W_188	8.12	8.07	7.7	7.28	-0.4691	-0.78921
	YBR214W_36	5.8	6.11	5.3	3.94	-0.4683	-2.16354
	YER118C_146	5.21	5.07	4.7	4.53	-0.4654	-0.54156
	YOR230W_4	8.6	9.18	8.1	8.4	-0.4633	-0.77335
	YPL243W_56	6.47	6.13	6	4.94	-0.4622	-1.18732
	YDL134C_337	6.64	6.46	6.2	6.53	-0.4571	0.0699
	YLR181C_42	4.45	4.19	4	5.26	-0.4448	1.074
	YAL053W_72	6.87	7.24	6.4	7.34	-0.4412	0.09257
	YDR077W_14	10.08	10.45	9.6	8.95	-0.4412	-1.5007
	YCL037C_20	7.77	7.86	7.3	7.53	-0.4388	-0.32253
	YPR024W_125	7.18	7.45	6.7	6.94	-0.4381	-0.5093
	YER094C_58	6.61	6.8	6.2	3.94	-0.433	-2.85445
	YDL132W_60	6.75	7.11	6.3	7.71	-0.4215	0.5979
	YHL011C_45	6.49	6.74	6.1	6.27	-0.4208	-0.47281
	YDL160C_114	7.7	7.87	7.3	7.46	-0.4207	-0.40786
	YBR060C_13	4.65	4.92	4.2	4.53	-0.4195	-0.39173
	YJL101C_70	5.54	5.19	5.1	3.94	-0.4171	-1.24447
	YLR190W_60	6.6	6.57	6.2	4.94	-0.4167	-1.62682
	YNL160W_21	8.86	9.13	8.4	8.04	-0.4139	-1.08844
	YJL094C_22	5.42	5.75	5	6.26	-0.4108	0.51485
	YOR008C_34	5.64	5.56	5.2	5.26	-0.4103	-0.29505
	YPL087W_3	5.42	5.73	5	3.94	-0.4061	-1.78731
	YER089C_134	7.08	6.48	6.7	5.53	-0.4036	-0.94966
	YDR208W_55	6.21	6.56	5.8	4.95	-0.3892	-1.61033
	YIL033C_23	6.67	6.76	6.3	5.27	-0.3886	-1.4912
	YHR205W_235	6.72	6.75	6.3	6.53	-0.3857	-0.22371
	YKL054C_40	8.02	8	7.6	8.34	-0.3856	0.33287
	YGR157W_201	9.37	9.01	9	8.07	-0.3847	-0.94941
	YDR284C_88	5.27	5.49	4.9	3.94	-0.3836	-1.54808
	YDR284C_178	5.27	5.49	4.9	3.94	-0.3828	-1.54602
	YHR135C_87	6.45	5.9	6.1	5.94	-0.381	0.03931
	YKL126W_68	6.85	6.99	6.5	6.94	-0.3777	-0.04615
	YKL080W_22	8.31	7.96	7.9	7.39	-0.3769	-0.56819
	YLR089C_270	6.12	6.45	5.7	7.19	-0.3729	0.73764
	YOL126C_20	5.38	5.04	5	4.53	-0.3699	-0.50548
	YOL126C_23	5.38	5.04	5	2.94	-0.3699	-2.09417
	YOL126C_26	5.38	5.04	5	2.94	-0.3699	-2.09417
	YNL007C_115	7.44	7.31	7.1	5.53	-0.3674	-1.78855
	YMR189W_71	8.67	7.66	8.3	6.86	-0.3665	-0.79778
	YLR190W_57	6.6	6.57	6.2	4.94	-0.3643	-1.62682
	YBR067C_34	8.07	8.25	7.7	5.94	-0.3635	-2.31494
	YLR223C_202	5.69	6.31	5.3	6.75	-0.3585	0.44152
	YDR303C_139	6.18	6.44	5.8	6.76	-0.3557	0.31718
	YER136W_36	7.17	7.08	6.8	6.4	-0.3556	-0.67868
	YDL045C_16	4.1	4.4	3.7	4.53	-0.3537	0.13053
	YDR251W_255	6.63	6.37	6.3	6.75	-0.349	0.38007
	YNL160W_12	8.86	9.13	8.5	8.04	-0.349	-1.08848
	YHR159W_33	4.09	4.1	3.7	3.94	-0.3469	-0.16182
	YMR315W_11	7.12	6.87	6.8	4.94	-0.3425	-1.92647
	YLL013C_70	7.05	7.03	6.7	3.94	-0.3423	-3.09083
	YHR162W_65	7.01	6.95	6.7	6.4	-0.3388	-0.54859
	YML106W_144	7.4	6.77	7.1	6.4	-0.3361	-0.36964
	YPR120C_64	4.08	4.03	3.7	4.53	-0.3306	0.49277
	YKL181W_130	7.64	7.09	7.3	6.11	-0.3292	-0.98045
	YKL054C_31	8.02	8	7.7	8.34	-0.31	0.33288
	YDR293C_114	8.32	8.59	8	7.99	-0.3088	-0.6024
	YDL134C_313	6.64	6.46	6.3	6.64	-0.3052	0.18505
	YPL146C_17	4.72	4.37	4.4	5.95	-0.3009	1.57165
	YDR346C_12	7.12	6.63	6.8	6.26	-0.2999	-0.36474
	YBR162C_52	9.12	8.39	8.8	7.85	-0.2944	-0.54356
	YDR372C_74	6.24	5.86	5.9	6.53	-0.2931	0.67325
	YDR352W_119	4.52	4.55	4.2	5.26	-0.2849	0.71183
	YKL004W_232	6.55	6.36	6.3	7.34	-0.2724	0.97864
	YDR346C_67	7.12	6.62	6.8	4.53	-0.2676	-2.09516
	YBL045C_81	7.18	7.26	6.9	7.11	-0.2671	-0.14865
	YKR100C_173	5.01	4.99	4.7	5.95	-0.2609	0.95968
	YDR399W_40	6.49	5.6	6.2	6.26	-0.2538	0.6611
	YML086C_136	7	6.67	6.7	6.27	-0.2513	-0.40751
	YIL048W_120	6.32	6.57	6.1	5.27	-0.2492	-1.30725
	YJL129C_187	6.37	6.21	6.1	6.65	-0.2467	0.4379
	YDL135C_14	5.26	5.33	5	3.94	-0.2462	-1.39021
	YOL105C_221	4.26	4.13	4	3.94	-0.246	-0.19061
	YBL030C_37	8.28	7.97	8	8.4	-0.2418	0.43379
	YPL252C_7	4.84	4.95	4.6	5.53	-0.2405	0.58456
	YOR116C_71	7.87	7.82	7.6	7.85	-0.2331	0.03565
	YNL103W_55	5.46	5.77	5.2	4.53	-0.2323	-1.24183
	YNL251C_167	6.18	6.09	5.9	6.4	-0.2288	0.30408
	YGL116W_47	5.23	5.38	5	3.94	-0.2213	-1.43483
	YOR095C_22	5.22	4.92	5	5.53	-0.2164	0.60232
	YBR014C_41	4.81	5.02	4.6	3.94	-0.2116	-1.07529
	YPL145C_140	6.96	6.76	6.7	6.11	-0.2113	-0.65304
	YKL190W_26	5.44	5.12	5.2	5.75	-0.2105	0.62705
	YNL156C_145	5.54	5.71	5.3	4.94	-0.2084	-0.77317
	YGL114W_5	5.44	5.28	5.2	2.94	-0.2069	-2.33588
	YOR142W_164	6.54	5.98	6.3	5.94	-0.2043	-0.03294
	YDL145C_176	9.11	8.78	8.9	8.67	-0.2031	-0.10986
	YPR119W_95	6.15	5.87	5.9	4.53	-0.201	-1.33815
	YMR176W_67	6.15	6.43	5.9	7.04	-0.1986	0.60985
	YPR149W_20	8.38	8.38	8.2	8.62	-0.1952	0.24354
	YOL103W_25	6.42	6.26	6.2	5.53	-0.1949	-0.73656
	YLR256W_91	8.43	8.3	8.2	7.8	-0.1946	-0.49873
	YDR232W_92	7.11	6.87	6.9	6.26	-0.1943	-0.60368
	YDR072C_56	5.61	5.6	5.4	6.85	-0.1879	1.24554
	YKR042W_17	9.77	9.66	9.6	9.15	-0.1873	-0.51218
	YDR372C_105	6.24	5.86	6.1	5.26	-0.1734	-0.59243
	YPL246C_8	5.76	5.76	5.6	5.75	-0.1688	-0.01046
	YGR189C_27	7.93	8.52	7.8	7.25	-0.1676	-1.26983
	YNL201C_159	5.68	5.86	5.5	5.26	-0.1658	-0.59407
	YDR293C_99	8.32	8.59	8.2	8.03	-0.1652	-0.5586
	YBR187W_109	6.45	6.17	6.3	5.53	-0.1632	-0.64046
	YKR042W_4	9.77	9.66	9.6	9.22	-0.1605	-0.44207
	YDR169C_303	4.91	5.19	4.7	5.27	-0.1604	0.07454
	YNL189W_139	7.73	7.63	7.6	8.31	-0.1561	0.68159
	YOR247W_178	7.55	7.37	7.4	7.11	-0.1499	-0.25768
	YLR139C_89	3.9	4.19	3.7	5.53	-0.1497	1.33953
	YHR021C_7	8.56	8.13	8.4	7.11	-0.1491	-1.02409
	YLR130C_36	7.22	7.32	7.1	6.85	-0.1484	-0.46966
	YBR078W_133	10.45	9.87	10.3	9.38	-0.1481	-0.48871
	YHL010C_5	4.37	4.59	4.2	4.94	-0.1391	0.35212
	YGL248W_8	5.02	5.61	4.9	4.95	-0.1387	-0.66195
	YGR054W_117	7.2	7.23	7.1	3.94	-0.1366	-3.28751
	YNL197C_38	5.95	6.21	5.8	5.26	-0.1358	-0.95014
	YLR372W_61	7.59	7.29	7.5	8.06	-0.1345	0.77336
	YBR086C_59	8.07	7.57	7.9	7.03	-0.1253	-0.53844
	YOR346W_52	5.94	5.63	5.8	3.94	-0.1243	-1.68715
	YJR090C_162	6.41	6.93	6.3	7.19	-0.1236	0.25377
	YLR256W_110	8.43	8.3	8.3	8.03	-0.1193	-0.27168
	YDL188C_130	6.59	6.44	6.5	5.75	-0.1187	-0.68826
	YGR119C_34	6.18	6.11	6.1	5.75	-0.1154	-0.3566
	YDL025C_83	5.34	5.26	5.2	6.65	-0.1094	1.39415
	YOR095C_16	5.22	4.92	5.1	5.53	-0.1013	0.60235
	YKL140W_218	5.61	5.57	5.5	4.94	-0.1	-0.62911
	YER118C_133	5.21	5.07	5.1	5.53	-0.0867	0.45796
	YHR205W_217	6.72	6.75	6.6	6.94	-0.0832	0.19059
	YCL017C_56	6.75	6.68	6.7	6.4	-0.074	-0.27662
	YKR002W_25	5.3	5.47	5.2	5.53	-0.0643	0.05898
	YBR214W_27	5.8	6.11	5.7	4.52	-0.0527	-1.58254
	YDL074C_40	5.94	5.72	5.9	6.75	-0.0524	1.02626
	YMR212C_86	6.28	6.33	6.2	5.26	-0.0503	-1.06851
	YHR004C_59	4.46	4.78	4.4	5.75	-0.0391	0.97237
	YLR277C_69	5.46	5.65	5.4	6.86	-0.0385	1.21135
	YNL238W_38	6.22	6.15	6.2	6.4	-0.0364	0.24607
	YDL160C_96	7.7	7.87	7.7	7.83	-0.0291	-0.04124
	YGR169C-A_59	3.04	2.95	3	2.94	-0.028	-0.01216
	YOL105C_110	4.26	4.13	4.2	3.94	-0.0234	-0.19312
	YGL190C_203	5.9	6.21	5.9	4.53	-0.0176	-1.68647
	YNL037C_62	7.11	7.44	7.1	8.04	-0.0155	0.59874
	YBR283C_80	7.97	7.68	8	6.75	-0.0119	-0.9257
	YNL007C_106	7.44	7.31	7.4	6.26	-0.0111	-1.05108
	YPL032C_133	7.02	6.94	7	5.26	-0.0108	-1.67567
	YPL145C_169	6.96	6.76	6.9	5.26	-0.0097	-1.5005
	YGR138C_152	6.82	7.59	6.8	7.64	-0.0038	0.0545
	YDR099W_11	7.86	7.65	7.9	6.75	0.005	-0.90398
	YDR214W_35	6.94	7.88	7	8.33	0.0069	0.45071
	YBR086C_187	8.07	7.57	8.1	7.19	0.0094	-0.37459
	YOL063C_27	5.58	6.08	5.6	6.11	0.0147	0.02829
	YGR036C_148	3.4	3.45	3.4	2.94	0.0267	-0.50524
	YPL179W_141	6.25	6.34	6.3	7.47	0.0315	1.12252
	YDR082W_14	3.98	4.67	4	5.94	0.0327	1.2688
	YCR004C_26	6.82	6.84	6.9	6.64	0.0337	-0.20183
	YGR255C_26	5.98	6.16	6	5.53	0.034	-0.6363
	YDR033W_20	10.11	9.79	10.1	9.64	0.0343	-0.14901
	YDR414C_54	3.97	4.07	4	3.94	0.0348	-0.13178
	YBL052C_141	5.56	5.55	5.6	5.53	0.0367	-0.02059
	YMR189W_31	8.67	7.66	8.7	7.77	0.0383	0.11374
	YKL164C_58	8.06	7.96	8.1	6.51	0.0385	-1.44579
	YLR286C_132	9.02	9.24	9.1	8.75	0.0387	-0.48667
	YDR372C_149	6.24	5.85	6.3	5.75	0.04	-0.10464
	YOL123W_321	7.31	7.05	7.4	7.11	0.0405	0.06048
	YDR372C_65	6.24	5.86	6.3	6.94	0.0415	1.08853
	YNL294C_48	5.07	5.53	5.1	5.26	0.0513	-0.26774
	YKL140W_72	5.61	5.57	5.7	5.26	0.0603	-0.30646
	YDR293C_474	8.32	8.59	8.4	8.43	0.0604	-0.1595
	YLR229C_184	5.95	5.35	6	4.53	0.0641	-0.82503
	YML106W_163	7.4	6.77	7.5	6.75	0.0641	-0.02207
	YDR284C_183	5.27	5.49	5.3	5.75	0.0646	0.25993
	YDR214W_94	6.94	7.88	7	7.46	0.0676	-0.42462
	YOR014W_175	7.05	6.86	7.1	7.04	0.0687	0.1723
	YNL007C_100	7.44	7.31	7.5	6.26	0.0764	-1.05107
	YPR125W_26	4.81	4.69	4.9	5.26	0.0776	0.57347
	YNR055C_397	6.48	6.21	6.6	2.94	0.079	-3.26993
	YDR524C-B_20	9.34	8.87	9.4	7.16	0.082	-1.71087
	YDL055C_21	10.33	9.87	10.4	9.72	0.0865	-0.14761
	YJL079C_36	6.95	6.32	7	6.4	0.0919	0.08279
	YBR059C_113	7.33	7.35	7.4	7.4	0.093	0.04798
	YPR149W_138	8.38	8.38	8.5	7.85	0.0933	-0.52849
	YDL081C_41	9.4	8.53	9.5	7.69	0.0967	-0.84407
	YOR196C_1	4.91	4.79	5	4.53	0.0976	-0.26496
	YJL129C_149	6.37	6.21	6.5	6.75	0.0979	0.54636
	YGL167C_276	7.78	7.76	7.9	7.02	0.1034	-0.74055
	YGL022W_12	8.47	8.27	8.6	7.53	0.106	-0.74398
	YBL030C_10	8.28	7.97	8.4	8.73	0.1091	0.75515
	YPR065W_16	4.48	4.68	4.6	4.53	0.1095	-0.15319
	YOR043W_262	5.83	5.7	5.9	6.64	0.114	0.93949
	YNR055C_391	6.48	6.21	6.6	2.94	0.1194	-3.26998
	YDL160C_228	7.7	7.87	7.8	7.65	0.122	-0.2231
	YLR229C_172	5.95	5.35	6.1	4.94	0.1229	-0.41037
	YDR466W_41	5.3	5.52	5.4	4.53	0.1245	-0.9941
	YPL184C_23	7.1	6.73	7.2	5.26	0.1306	-1.46946
	YBR086C_47	8.07	7.57	8.2	7.11	0.1328	-0.45643
	YDR452W_94	6.9	6.64	7	7.53	0.1387	0.88988
	YDR298C_76	6.53	5.9	6.7	7.47	0.1392	1.564
	YMR145C_159	7.19	7.32	7.3	7.94	0.1394	0.62243
	YBL032W_30	6.92	6.24	7.1	5.53	0.1468	-0.70625
	YOL016C_73	5.36	5.96	5.5	5.94	0.1504	-0.01488
	YDR306C_4	4.44	4.93	4.6	5.26	0.1505	0.33556
	YJR045C_99	10.5	10.36	10.7	9.57	0.1617	-0.78891
	YNL032W_28	4.07	4.1	4.2	4.53	0.1625	0.42296
	YOL063C_6	5.58	6.08	5.7	6.26	0.1667	0.17979
	YER111C_290	6.11	6.64	6.3	7.19	0.1772	0.54936
	YNL064C_80	8.3	8.32	8.5	8.89	0.1776	0.57015
	YHR008C_2	7.05	7.14	7.2	7.02	0.1786	-0.11958
	YBR015C_59	7.25	7.19	7.4	7.65	0.179	0.46589
	YLR208W_32	7.15	6.96	7.3	5.94	0.1798	-1.0209
	YPL184C_355	7.1	6.73	7.3	6.65	0.1817	-0.0874
	YAL016W_47	7.24	7.14	7.4	5.75	0.1859	-1.39509
	YGL037C_42	7.54	8.25	7.7	8.57	0.1893	0.32131
	YGL037C_45	7.54	8.25	7.7	8.57	0.1893	0.32131
	YDR071C_26	6.23	6.08	6.4	2.94	0.1925	-3.13674
	YPL089C_116	4.55	5.41	4.7	6.86	0.1953	1.44047
	YGL077C_75	7.65	7.44	7.9	6.27	0.1958	-1.17108
	YLR372W_100	7.59	7.29	7.8	7.53	0.1958	0.24147
	YJL166W_16	5.75	5.73	5.9	5.52	0.196	-0.2048
	YJL166W_9	5.75	5.73	5.9	4.53	0.1961	-1.20096
	YER020W_40	5.54	5.8	5.7	5.27	0.204	-0.52491
	YER118C_121	5.21	5.07	5.4	5.75	0.2132	0.67963
	YLR096W_62	6.34	6.4	6.6	5.53	0.2132	-0.87443
	YHR009C_165	6.96	7.05	7.2	6.95	0.2199	-0.1079
	YBL030C_1	8.28	7.97	8.5	8.83	0.2202	0.85596
	YER048C_20	6.53	6.12	6.7	6.94	0.2203	0.82253
	YGR279C_18	9.7	9.14	9.9	8.9	0.2207	-0.23886
	YKL064W_57	6.29	6.5	6.5	8.15	0.2207	1.65547
	YGL190C_86	5.9	6.21	6.1	3.94	0.2239	-2.26931
	YDR490C_41	5.59	6.04	5.8	6.41	0.2244	0.36762
	YLR093C_39	5.37	5.32	5.6	6.27	0.226	0.94782
	YLR206W_77	6.66	6.47	6.9	5.75	0.2278	-0.71956
	YGR020C_43	6.4	6.18	6.6	7.35	0.2301	1.17015
	YBL099W_54	9.16	8.63	9.4	8.95	0.2319	0.32081
	YLR023C_82	5.84	6.59	6.1	7.03	0.232	0.44355
	YML086C_121	7	6.67	7.2	6.94	0.2336	0.26716
	YBR086C_172	8.07	7.57	8.3	7.41	0.2338	-0.16241
	YLR229C_154	5.95	5.35	6.2	5.26	0.2339	-0.08885
	YIL033C_75	6.67	6.76	6.9	7.2	0.2395	0.43438
	YGR210C_76	5.98	5.96	6.2	5.52	0.2505	-0.43982
	YGR255C_17	5.98	6.16	6.2	5.75	0.2567	-0.41477
	YAL053W_94	6.87	7.24	7.1	7.47	0.2587	0.22306
	YLR206W_59	6.66	6.47	6.9	6.75	0.2596	0.28469
	YER123W_44	4.97	5.14	5.2	4.53	0.2597	-0.61603
	YMR241W_84	7.14	6.87	7.4	8.14	0.261	1.27421
	YDR497C_16	9.56	9.1	9.8	9.83	0.2633	0.73264
	YNL201C_129	5.68	5.86	5.9	5.75	0.2699	-0.10977
	YBR078W_87	10.45	9.87	10.7	9.8	0.2747	-0.0684
	YMR223W_133	4.73	4.91	5	5.26	0.2827	0.35368
	YBR067C_11	8.07	8.25	8.4	8.36	0.2839	0.10976
	YKR014C_15	5.31	4.99	5.6	5.27	0.2882	0.27537
	YMR108W_25	8.43	7.99	8.7	7.69	0.2894	-0.29746
	YNL085W_105	8.22	8.17	8.5	7.89	0.29	-0.27748
	YEL026W_62	6.91	6.67	7.2	5.52	0.2964	-1.15572
	YER089C_116	7.08	6.48	7.4	6.12	0.3028	-0.36532
	YLR093C_4	5.37	5.32	5.7	6.4	0.3045	1.08084
	YEL009C_129	8.51	8.47	8.8	7.39	0.305	-1.08019
	YER012W_30	6.33	5.94	6.6	5.26	0.3071	-0.67077
	YMR241W_21	7.14	6.87	7.5	8.08	0.3083	1.20938
	YNL164C_91	3.43	3.93	3.7	4.94	0.3174	1.01204
	YML130C_35	6.05	6.55	6.4	6.75	0.33	0.195
	YGL190C_292	5.9	6.21	6.2	5.26	0.3302	-0.95081
	YNL085W_86	8.22	8.17	8.6	7.58	0.3314	-0.58963
	YLR257W_138	6.52	6.59	6.9	6.4	0.3324	-0.18783
	YBR199W_57	6.7	6.42	7	5.94	0.3347	-0.47301
	YDR354W_2	5.41	5.01	5.7	3.94	0.3388	-1.07064
	YJL129C_131	6.37	6.21	6.7	6.95	0.3388	0.73905
	YJL026W_20	8.21	8.72	8.6	8.4	0.3389	-0.31603
	YNR055C_98	6.48	6.21	6.8	4.53	0.3403	-1.68339
	YER107C_73	5.33	5.16	5.7	7.27	0.3419	2.11465
	YMR305C_51	8.11	7.56	8.5	8.4	0.3445	0.84125
	YER027C_24	5.98	5.88	6.3	4.94	0.3499	-0.93758
	YBR164C_32	5.71	5.41	6.1	5.53	0.3537	0.11281
	YPL190C_38	6.46	6.67	6.8	5.94	0.3541	-0.72813
	YNL032W_68	4.07	4.1	4.4	5.53	0.3558	1.43159
	YKL185W_263	6.64	6.7	7	7.19	0.3692	0.48398
	YHR026W_35	7.34	6.91	7.7	7.26	0.3712	0.34824
	YGL028C_127	6.75	7.23	7.1	8.28	0.3745	1.04229
	YML018C_38	5.13	5.48	5.5	5.53	0.3778	0.045
	YML106W_125	7.4	6.77	7.8	6.94	0.3784	0.16945
	YKR003W_60	5.8	5.95	6.2	7.59	0.3798	1.64345
	YDR531W_33	5.5	5.41	5.9	6.11	0.3882	0.69628
	YDL188C_115	6.59	6.44	7	6.4	0.3922	-0.03481
	YGL058W_21	4.93	5.28	5.3	5.75	0.4006	0.47164
	YDR350C_14	4.61	4.95	5	5.26	0.4016	0.30966
	YDR046C_52	6.9	6.69	7.3	8.26	0.408	1.57372
	YJL129C_122	6.37	6.21	6.8	7.19	0.4108	0.98661
	YPR165W_134	7.31	6.65	7.7	7.51	0.4138	0.86389
	YMR190C_118	6.33	6.68	6.7	5.75	0.4149	-0.93232
	YBR078W_78	10.45	9.87	10.9	9.92	0.4158	0.05076
	YLR407W_190	3.59	3.84	4	4.52	0.4194	0.68963
	YFR053C_11	9.04	9.59	9.5	9.12	0.4228	-0.47588
	YLR009W_25	4.81	4.97	5.2	5.53	0.4235	0.56344
	YPL023C_88	5.95	5.86	6.4	6.11	0.4275	0.24959
	YDL002C_43	4	3.81	4.4	-0.81	0.4286	-4.62261
	YMR097C_22	4	4.3	4.4	-0.81	0.4292	-5.10891
	YMR016C_157	4.8	5.17	5.2	5.27	0.4293	0.10212
	YML106W_100	7.4	6.77	7.8	7.33	0.4316	0.56342
	YPL184C_329	7.1	6.73	7.5	5.75	0.4335	-0.98137
	YMR238W_75	6.15	5.72	6.6	7.26	0.4406	1.54258
	YOR089C_10	4.68	4.85	5.1	2.94	0.4426	-1.90611
	YLR079W_8	5.14	5.4	5.6	6.62	0.4454	1.224
	YDR062W_12	7.21	7.01	7.7	6.52	0.4469	-0.48658
	YNL201C_99	5.68	5.86	6.1	5.75	0.4469	-0.10975
	YBR212W_332	5.56	5.71	6	6.12	0.4477	0.4102
	YDL072C_26	6.36	6.49	6.8	5.94	0.4557	-0.54809
	YHR072W-A_9	5.43	5.19	5.9	4.53	0.4572	-0.66101
	YLR025W_60	4.77	4.78	5.2	3.94	0.4591	-0.83936
	YGL224C_65	4.13	4.3	4.6	2.95	0.4691	-1.35688
	YGL077C_85	7.65	7.44	8.1	7.47	0.4702	0.02904
	YML071C_21	4.94	5.04	5.4	6.26	0.481	1.22145
	YOR008C_28	5.64	5.56	6.1	6.75	0.4825	1.19043
	YDR293C_417	8.32	8.59	8.8	8.9	0.4914	0.30917
	YJR045C_25	10.5	10.36	11	10.94	0.4933	0.57558
	YER089C_264	7.08	6.48	7.6	6.64	0.4988	0.1608
	YBR059C_101	7.33	7.35	7.8	7.94	0.5023	0.58917
	YNR051C_228	6.04	5.87	6.6	6.64	0.5147	0.76899
	YAL040C_246	6.18	6.12	6.7	4.53	0.5316	-1.59391
	YIL002C_126	5.59	5.57	6.1	5.76	0.5359	0.18771
	YCR068W_86	4.98	5.33	5.5	4.95	0.5364	-0.38711
	YPR149W_92	8.38	8.38	8.9	8.46	0.541	0.08214
	YPR073C_12	5.33	4.86	5.9	5.94	0.5532	1.08402
	YGR167W_10	6.52	6.01	7.1	6.27	0.5536	0.25278
	YOR110W_39	4.56	4.58	5.1	3.94	0.5616	-0.63601
	YJR007W_35	6.79	6.25	7.4	7.4	0.5677	1.15566
	YBR164C_19	5.71	5.41	6.3	4.94	0.569	-0.47127
	YBR162C_28	9.12	8.39	9.7	8.45	0.5709	0.06346
	YOR194C_34	4.85	4.72	5.4	3.94	0.5726	-0.77728
	YNL189W_54	7.73	7.63	8.3	8.11	0.5891	0.48918
	YOR043W_240	5.83	5.7	6.4	6.64	0.5904	0.93949
	YLR089C_191	6.12	6.45	6.7	7.99	0.5905	1.53537
	YDR046C_37	6.9	6.69	7.5	8.33	0.5916	1.64359
	YER100W_181	4.83	5.26	5.4	3.94	0.5949	-1.3208
	YHR195W_95	4.41	4.47	5	6.12	0.5977	1.64905
	YOR152C_465	3.62	4.17	4.2	4.53	0.6084	0.36515
	YBR154C_28	5.9	5.69	6.5	4.94	0.6087	-0.75017
	YOR152C_267	3.62	4.16	4.2	6.65	0.6093	2.48755
	YHR104W_46	6.77	7.33	7.4	6.77	0.6124	-0.56209
	YHR005C_12	6.1	5.42	6.7	6.75	0.6132	1.33272
	YDR214W_87	6.94	7.88	7.6	7.96	0.614	0.08066
	YDR284C_125	5.27	5.49	5.9	3.94	0.6175	-1.54471
	YMR016C_144	4.8	5.17	5.4	5.76	0.622	0.59136
	YPL184C_249	7.1	6.73	7.7	7.03	0.6287	0.29815
	YGL257C_70	5.5	5.02	6.1	4.94	0.6293	-0.07295
	YEL051W_30	7.59	7.31	8.2	7.19	0.6299	-0.1175
	YHL034C_54	7.56	6.95	8.2	7.19	0.6347	0.2408
	YJL164C_110	5.88	5.78	6.5	6.76	0.6382	0.97637
	YBR221C_37	8.3	7.72	8.9	8.88	0.6385	1.15944
	YDL027C_32	4.68	4.91	5.3	5.53	0.6451	0.6185
	YBR078W_109	10.45	9.87	11.1	10.22	0.6466	0.3579
	YDR086C_46	6.23	5.65	6.9	7.11	0.6563	1.46015
	YIL038C_152	6.32	6.22	7	7.65	0.6571	1.4304
	YDR492W_60	4.57	4.98	5.2	5.95	0.6612	0.96534
	YBR208C_63	6.05	5.98	6.7	7.53	0.6615	1.55109
	YGR024C_20	4.93	5.05	5.6	6.65	0.6625	1.59993
	YPR149W_71	8.38	8.38	9	8.52	0.671	0.14244
	YKL005C_12	4.75	5.06	5.4	4.94	0.673	-0.12174
	YGL167C_230	7.78	7.77	8.5	8.15	0.6779	0.38478
	YIL033C_57	6.67	6.76	7.4	7.27	0.6784	0.50974
	YOR039W_92	5.91	5.59	6.6	5.75	0.6807	0.1646
	YHR205W_155	6.72	6.75	7.4	7.64	0.6841	0.89273
	YPL141C_144	5.99	6.34	6.7	6.4	0.6841	0.06303
	YGR221C_21	4.2	3.52	4.9	2.94	0.6844	-0.5766
	YDR033W_197	10.11	9.79	10.8	10.06	0.6915	0.27141
	YGR229C_97	6.66	6.25	7.4	6.11	0.6922	-0.13609
	YML106W_82	7.4	6.77	8.1	7.7	0.6934	0.92343
	YPL256C_94	6.56	6.36	7.3	7.76	0.6998	1.39752
	YDL081C_23	9.4	8.53	10.1	8.58	0.702	0.05191
	YHR079C_88	5.89	6.08	6.6	6.11	0.7062	0.03162
	YDR441C_65	3.89	4.19	4.6	3.94	0.7083	-0.24359
	YDR303C_126	6.18	6.44	6.9	7.27	0.71	0.82783
	YER035W_49	4.71	5.11	5.4	6.26	0.71	1.14599
	YNL197C_144	5.95	6.22	6.7	6.65	0.721	0.43249
	YEL009C_117	8.51	8.47	9.2	7.88	0.7221	-0.58969
	YKL176C_64	6.4	6.4	7.1	7.75	0.7278	1.349
	YBR078W_51	10.45	9.87	11.2	10.34	0.7295	0.47429
	YMR089C_49	6.96	6.9	7.7	8.19	0.7302	1.28545
	YFL005W_75	6.52	6.26	7.3	5.94	0.7392	-0.31933
	YFL005W_78	6.52	6.26	7.3	5.94	0.7392	-0.31933
	YOR307C_62	5.26	5.62	6	7.41	0.746	1.7879
	YBR078W_39	10.45	9.87	11.2	10.36	0.7477	0.4913
	YEL013W_136	7.45	7.23	8.2	7.85	0.7496	0.61829
	YMR139W_156	4.76	4.99	5.5	6.65	0.7498	1.66085
	YML058W_2	7.26	7.74	8	8.12	0.7534	0.37489
	YGR241C_89	5.63	5.63	6.4	6.26	0.7538	0.63716
	YER067W_10	4.47	5.42	5.2	6.25	0.7629	0.83625
	YCL017C_44	6.75	6.68	7.5	7.11	0.7657	0.43562
	YBR060C_33	4.65	4.92	5.4	6.4	0.7736	1.48194
	YJR090C_72	6.41	6.93	7.2	7.11	0.7739	0.17938
	YJR090C_75	6.41	6.93	7.2	7.11	0.7739	0.17938
	YDL224C_233	6.04	5.85	6.8	6.85	0.778	0.99657
	YJL003W_18	3.23	3.69	4	4.53	0.7796	0.83823
	YPL020C_59	4.89	4.95	5.7	7.34	0.78	2.38566
	YEL042W_50	7.2	6.78	8	7.4	0.7927	0.6144
	YNL164C_67	3.43	3.93	4.2	5.53	0.8025	1.59721
	YKR068C_23	4.86	5.08	5.7	5.26	0.8088	0.17888
	YER057C_26	5.86	4.86	6.7	5.53	0.8115	0.67476
	YGR086C_31	8.99	8.89	9.8	10.13	0.8202	1.23361
	YOL123W_275	7.31	7.05	8.1	8.33	0.8248	1.28335
	YNL197C_126	5.95	6.22	6.8	6.65	0.8308	0.43262
	YKR067W_66	6.05	6.46	6.9	7.27	0.834	0.8154
	YMR200W_69	5.59	5.88	6.4	4.94	0.8352	-0.93449
	YNL151C_16	4.67	4.29	5.5	5.95	0.8357	1.66928
	YDL180W_21	4.83	4.86	5.7	3.94	0.838	-0.91847
	YMR005W_10	5.05	5.26	5.9	6.64	0.8387	1.38012
	YNL161W_34	5.87	6.02	6.7	6.52	0.8396	0.50487
	YMR296C_23	7.1	6.95	7.9	7.34	0.8451	0.39553
	YOL043C_51	2.9	3.25	3.7	5.26	0.8461	2.01712
	YDR247W_189	4.27	4.32	5.1	4.53	0.8511	0.21304
	YPL254W_8	4.9	4.95	5.7	6.12	0.8519	1.16423
	YER094C_31	6.61	6.8	7.5	7.27	0.8566	0.46824
	YOR307C_72	5.26	5.62	6.1	7.8	0.8619	2.18355
	YPL141C_135	5.99	6.34	6.8	6.4	0.8623	0.06303
	YCR028C_66	4.65	4.85	5.5	6.41	0.8629	1.55989
	YOL105C_77	4.26	4.13	5.1	4.53	0.8697	0.39373
	YLR073C_76	4.01	4.71	4.9	5.94	0.8746	1.22756
	YNL090W_134	4.79	4.71	5.7	6.53	0.8801	1.81937
	YGL071W_140	5.18	5.94	6.1	4.94	0.8868	-1.00371
	YBR059C_82	7.33	7.35	8.2	8.3	0.8869	0.94947
	YGR178C_31	7.64	7.58	8.5	7.95	0.8905	0.36547
	YML106W_230	7.4	6.77	8.3	8.11	0.8906	1.33639
	YBR135W_62	4.62	5.04	5.5	5.94	0.8923	0.89905
	YFR049W_25	4.43	3.95	5.3	5.75	0.8982	1.80009
	YPR020W_3	4.53	4.29	5.4	4.53	0.8982	0.24202
	YER111C_251	6.11	6.64	7	8.11	0.9042	1.46892
	YGR041W_176	5.56	5.96	6.5	7.33	0.9044	1.36811
	YGR138C_33	6.82	7.59	7.7	8.4	0.9075	0.81441
	YBR054W_38	8.49	9.36	9.4	10.44	0.9116	1.08487
	YEL013W_124	7.45	7.23	8.4	8.15	0.912	0.91752
	YLR019W_254	5.21	5	6.1	5.27	0.9148	0.26221
	YOR209C_51	6.86	6.78	7.8	7.46	0.9249	0.68605
	YGR241C_77	5.63	5.63	6.6	7.03	0.9289	1.40386
	YBR208C_54	6.05	5.98	7	7.76	0.9306	1.77232
	YER111C_240	6.11	6.64	7	8.03	0.9336	1.38886
	YPL214C_60	4.73	5.49	5.7	7.59	0.9397	2.0924
	YOR346W_110	5.94	5.63	6.9	6.94	0.9419	1.30811
	YGL019W_25	5.87	5.75	6.8	7.12	0.9456	1.36096
	YGR166W_30	4.47	4.68	5.4	6.27	0.9544	1.59147
	YML023C_18	4.38	4.61	5.3	6.75	0.9555	2.13928
	YDL053C_130	4.99	4.75	5.9	5.53	0.9624	0.7802
	YFL045C_19	8.59	7.9	9.6	8.93	0.9636	1.02112
	YNR051C_560	6.04	5.87	7	5.26	0.9686	-0.60857
	YOL123W_297	7.31	7.05	8.3	8.3	0.9686	1.24817
	YML106W_101	7.4	6.77	8.4	7.98	0.9757	1.21227
	YBR059C_77	7.33	7.35	8.3	8.5	0.9873	1.14587
	YGR057C_38	3.24	3.82	4.2	6.1	0.9933	2.2872
	YJR007W_17	6.79	6.25	7.8	7.8	0.9943	1.55705
	YDR468C_70	4.13	4.15	5.1	4.94	0.9978	0.79946
	YNR051C_557	6.04	5.87	7	5.26	0.9984	-0.60833
	YLR188W_20	5.94	5.7	6.9	6.4	1.0032	0.69851
	YOR136W_51	7.89	8.18	8.9	8.79	1.0042	0.61073
	YDL028C_159	5.12	5.35	6.1	5.75	1.005	0.40131
	YBL099W_76	9.16	8.63	10.2	9.65	1.0062	1.0234
	YLL027W_124	4.58	4.58	5.6	6.12	1.0093	1.5346
	YDR248C_50	4.11	3.63	5.1	5.76	1.01	2.12835
	YEL026W_49	6.91	6.67	7.9	6.52	1.0103	-0.15911
	YKR099W_114	4.41	4.84	5.4	5.94	1.0138	1.10462
	YNL307C_99	6.85	6.28	7.9	7.19	1.0153	0.91102
	YIL005W_77	5.93	5.37	6.9	5.75	1.0173	0.37847
	YEL023C_43	3.72	3.79	4.7	4.94	1.0232	1.15033
	YER057C_8	5.86	4.86	6.9	5.94	1.0236	1.08923
	YFL050C_80	3.72	4.17	4.7	5.94	1.0308	1.77733
	YDL146W_74	4.78	5.1	5.8	3.94	1.0316	-1.16231
	YGR065C_16	5.14	5.39	6.2	7.02	1.0345	1.62542
	YNL165W_33	3.71	4.25	4.7	4.53	1.0346	0.27762
	YDR298C_26	6.53	5.9	7.6	7.85	1.0403	1.94944
	YDL073W_136	5.77	6.09	6.8	7.86	1.0426	1.76718
	YPL184C_467	7.1	6.73	8.2	7.64	1.0512	0.9069
	YDR347W_20	5.68	5.98	6.7	6.75	1.063	0.76918
	YOR363C_16	4.87	5.2	5.9	6.26	1.0747	1.06002
	YPR133W-A_1	5.21	5.1	6.3	5.75	1.075	0.65049
	YGL202W_83	8.41	8.12	9.5	8.48	1.0755	0.36139
	YLR023C_64	5.84	6.59	6.9	7.64	1.0795	1.05503
	YBR132C_101	5.9	6.13	7	8.2	1.0799	2.06286
	YNL064C_141	8.3	8.32	9.4	9.17	1.0857	0.84463
	YNR051C_219	6.04	5.87	7.1	7.11	1.0857	1.23862
	YGL087C_2	4.42	5.13	5.5	6.94	1.0892	1.81727
	YKL181W_32	7.64	7.09	8.7	8.11	1.0915	1.02233
	YNR017W_141	6.03	5.88	7.1	6.11	1.0918	0.23162
	YOR014W_150	7.05	6.86	8.2	7.8	1.0984	0.93541
	YDR054C_57	5.32	5.35	6.4	6.4	1.1025	1.05111
	YMR305C_39	8.11	7.56	9.2	8.78	1.1063	1.21586
	YDR284C_29	5.27	5.49	6.4	6.11	1.1113	0.61922
	YBR054W_29	8.49	9.36	9.6	10.59	1.1137	1.23356
	YGR033C_30	4.89	4.62	6	5.75	1.1193	1.12229
	YPL145C_121	6.96	6.76	8.1	7.19	1.125	0.42476
	YAL040C_239	6.18	6.12	7.3	5.75	1.1286	-0.37123
	YDL188C_109	6.59	6.44	7.7	7.64	1.1432	1.20687
	YPL023C_66	5.95	5.86	7.1	7.18	1.1456	1.32189
	YLR378C_34	8.29	7.97	9.4	9.37	1.1508	1.39619
	YOL019W_77	5.27	5.02	6.4	4.94	1.1559	-0.0776
	YPL250C_41	2.85	4.23	4	4.94	1.1565	0.7093
	YDL014W_93	7.9	7.3	9.1	9.2	1.1645	1.9007
	YDR453C_12	3.07	3.85	4.2	5.55	1.1651	1.69705
	YDR453C_3	3.07	3.85	4.2	6.14	1.1654	2.28576
	YNR051C_210	6.04	5.87	7.2	7.11	1.1668	1.23855
	YBL099W_67	9.16	8.63	10.3	9.9	1.1692	1.27306
	YNL219C_54	6.3	6.18	7.5	6.85	1.1732	0.66236
	YNL197C_197	5.95	6.22	7.1	7.11	1.174	0.899
	YDR280W_76	4.49	4.59	5.7	6.75	1.1761	2.1584
	YPL184C_124	7.1	6.73	8.3	7.53	1.1819	0.79409
	YPR138C_104	5.52	5.42	6.7	6.75	1.1871	1.33096
	YML043C_148	3.4	4.23	4.6	5.52	1.191	1.28494
	YJL140W_2	5.52	5.49	6.7	7.27	1.1924	1.78223
	YGR036C_37	3.4	3.45	4.6	2.94	1.1959	-0.5036
	YDL188C_77	6.59	6.44	7.8	7.59	1.1971	1.15648
	YHR205W_139	6.72	6.75	7.9	7.89	1.1985	1.14435
	YOL012C_21	5.35	4.88	6.6	4.94	1.2004	0.0642
	YPL050C_67	6.2	6.07	7.4	7.53	1.2048	1.46655
	YLL010C_124	4.74	4.95	5.9	2.94	1.2066	-2.01007
	YDL014W_87	7.9	7.3	9.1	9.29	1.2071	1.99317
	YKL004W_67	6.55	6.36	7.8	7.9	1.2092	1.54307
	YNL066W_75	7.91	7.99	9.1	9.78	1.2126	1.79053
	YNL190W_178	8.12	8.07	9.3	8.16	1.2173	0.0898
	YBR212W_203	5.56	5.71	6.8	4.52	1.2207	-1.18415
	YOL123W_88	7.31	7.05	8.5	8.55	1.229	1.49939
	YPL184C_118	7.1	6.73	8.3	7.64	1.2311	0.90881
	YNL283C_130	5.75	5.37	7	5.75	1.2343	0.37647
	YMR139W_141	4.76	4.99	6	6.95	1.2474	1.95976
	YPR016C_24	6.46	6.2	7.7	6.85	1.2503	0.64517
	YER076C_1	2.97	2.83	4.2	5.52	1.2582	2.69481
	YBR054W_16	8.49	9.36	9.8	10.56	1.2588	1.20492
	YDR251W_72	6.63	6.37	7.9	7.26	1.2675	0.89446
	YGR135W_60	6.99	6.62	8.3	7.89	1.2676	1.26331
	YPR016C_21	6.46	6.2	7.7	6.85	1.2686	0.6452
	YDL141W_118	6.24	5.96	7.5	7.64	1.2689	1.67987
	YHR210C_25	2.15	3.01	3.4	6.12	1.2716	3.10906
	YJR045C_18	10.5	10.36	11.8	11.37	1.2798	1.0044
	YER148W_98	6.17	5.92	7.4	7.65	1.2821	1.7297
	YEL023C_126	3.72	3.79	5	6.53	1.2861	2.7362
	YGR020C_18	6.4	6.18	7.7	7.76	1.29	1.58468
	YNL283C_182	5.75	5.37	7	6.11	1.2937	0.74181
	YGL115W_44	6.19	6.22	7.5	7.69	1.2962	1.46677
	YNR017W_71	6.03	5.88	7.3	6.27	1.2975	0.38656
	YPL133C_34	4.13	4.47	5.4	6.4	1.2995	1.92086
	YDL138W_150	4.88	5.21	6.2	7.19	1.3018	1.97602
	YMR026C_43	4.21	4.31	5.5	5.26	1.3028	0.95261
	YAL034C_112	4.03	4.73	5.3	5.26	1.3029	0.52563
	YFL039C_35	11.08	10.61	12.4	11.7	1.303	1.08617
	YBR158W_95	7.13	7.33	8.4	9.21	1.3071	1.87674
	YHR050W_141	5.85	5.98	7.2	7.11	1.3078	1.13762
	YBR270C_75	2.92	3.7	4.2	5.75	1.3092	2.05152
	YOL123W_245	7.31	7.05	8.6	9.04	1.3096	1.99423
	YOR142W_138	6.54	5.98	7.9	7.03	1.3153	1.05145
	YLR327C_11	2.92	5.55	4.2	6.89	1.3202	1.34231
	YGL257C_49	5.5	5.02	6.8	6.11	1.3209	1.09253
	YER159C_10	4.42	4.5	5.7	6.53	1.3238	2.03002
	YBL103C_156	4.09	4.08	5.4	7.02	1.3348	2.94661
	YFR017C_4	3.67	4.73	5	7.25	1.3363	2.51618
	YOR246C_40	6.08	6.08	7.4	7.47	1.3401	1.38611
	YPL256C_68	6.56	6.36	7.9	8.19	1.3434	1.83641
	YPL256C_58	6.56	6.36	7.9	8.16	1.3439	1.79763
	YLR257W_125	6.52	6.59	7.9	7.57	1.3653	0.98069
	YKL183W_88	4.38	4.09	5.7	5.94	1.3678	1.85016
	YDR131C_1	3.64	4.22	5	5.53	1.3681	1.304
	YLL018C-A_28	3.06	2.86	4.4	3.94	1.3681	1.08204
	YJL129C_92	6.37	6.21	7.7	7.59	1.3756	1.38284
	YHL011C_68	6.49	6.74	7.9	8.75	1.38	2.00347
	YOL032W_60	3.74	4.08	5.1	4.94	1.3842	0.86118
	YGL018C_19	3.04	3.26	4.4	5.94	1.3851	2.68177
	YDR404C_109	4.68	4.45	6.1	5.75	1.3877	1.3018
	YEL016C_87	4.99	4.95	6.4	7.58	1.3899	2.62935
	YHR205W_90	6.72	6.75	8.1	7.8	1.3927	1.05094
	YGR020C_6	6.4	6.18	7.8	7.76	1.3978	1.58381
	YEL023C_117	3.72	3.79	5.1	7.12	1.4017	3.32473
	YOR142W_39	6.53	5.97	7.9	5.75	1.4042	-0.22416
	YDR279W_40	3.92	3.68	5.3	3.94	1.4108	0.26238
	YGR071C_31	4.91	5.33	6.3	6.11	1.4165	0.77619
	YKR100C_119	5.01	4.99	6.4	6.65	1.4167	1.66145
	YCR028C_17	4.65	4.85	6.1	6.75	1.4195	1.90924
	YEL009C_249	8.51	8.47	9.9	9.71	1.4259	1.2395
	YPR159W_50	8	8.06	9.4	9.34	1.4263	1.28081
	YOL123W_79	7.31	7.05	8.7	8.66	1.4313	1.60909
	YDR441C_56	3.89	4.19	5.3	5.53	1.4457	1.33995
	YKL185W_188	6.64	6.71	8.1	8.55	1.4551	1.84367
	YJL174W_40	6.68	6.74	8.1	8.08	1.46	1.3445
	YIL090W_53	5.38	5.68	6.9	5.75	1.469	0.0743
	YLR219W_121	5.48	5.58	7	6.86	1.4719	1.28084
	YNL064C_73	8.3	8.32	9.8	9.95	1.4721	1.63221
	YBR120C_28	3.12	3.04	4.6	2.94	1.4768	-0.09358
	YJL164C_101	5.88	5.78	7.4	7.6	1.4799	1.81992
	YER048C_3	6.53	6.12	8	7.8	1.4821	1.67844
	YPR138C_59	5.52	5.42	7	7.33	1.4873	1.91668
	YHR009C_86	6.96	7.05	8.5	8.47	1.4986	1.41235
	YBR052C_34	6.43	6.72	7.9	8.14	1.501	1.42601
	YNL176C_115	5.22	5.43	6.7	6.54	1.5039	1.11418
	YBL103C_132	4.09	4.08	5.6	7.18	1.5047	3.10453
	YGL028C_102	6.75	7.23	8.3	9.3	1.5066	2.06835
	YOR034C_13	5.44	5.59	6.9	7.33	1.5111	1.74403
	YCR023C_21	5.49	5.27	7	6.85	1.5163	1.58391
	YGL160W_13	5.43	5.24	6.9	6.75	1.5169	1.50678
	YDL053C_109	4.99	4.75	6.5	6.11	1.5261	1.36344
	YOR047C_46	4.65	4.61	6.2	3.95	1.5278	-0.6623
	YHR162W_51	7.01	6.95	8.5	8.15	1.5316	1.20021
	YGR041W_117	5.56	5.96	7.1	7.47	1.5326	1.50533
	YBR211C_4	3.59	3.65	5.1	5.53	1.538	1.87836
	YNL090W_124	4.79	4.71	6.3	7.34	1.5395	2.62996
	YLL010C_113	4.74	4.95	6.3	5.53	1.5416	0.57292
	YPL008W_83	4.83	5.14	6.4	7.03	1.5518	1.89097
	YGR169C-A_37	3.04	2.95	4.6	4.94	1.5562	1.9886
	YDR248C_46	4.11	3.63	5.7	5.95	1.557	2.32314
	YDR143C_77	5.45	5.18	7	7.12	1.5615	1.93478
	YGR161C_20	3.32	4.53	4.9	3.94	1.5637	-0.58987
	YAL034C_85	4.03	4.73	5.6	5.75	1.5662	1.01578
	YJL124C_131	5.27	4.87	6.9	7.04	1.5787	2.16104
	YPR138C_44	5.52	5.42	7.1	7.33	1.6027	1.91668
	YOR228C_107	3.4	3.43	5	4.95	1.606	1.51675
	YBR125C_126	4.86	5.35	6.5	6.28	1.6066	0.92583
	YDL053C_162	4.99	4.75	6.6	5.53	1.6079	0.78071
	YPR156C_44	7.1	7.46	8.7	9.31	1.6079	1.84516
	YIL038C_71	6.32	6.22	7.9	8.38	1.6089	2.15458
	YIL038C_74	6.32	6.22	7.9	8.38	1.6089	2.15458
	YMR166C_197	3.39	3.84	5	5.53	1.6218	1.68728
	YHR162W_16	7.01	6.95	8.6	8.44	1.6226	1.48674
	YJR134C_16	5.25	4.99	6.9	7.11	1.6327	2.12269
	YMR126C_105	3.37	3.48	5	6.12	1.6432	2.63585
	YLR229C_72	5.95	5.35	7.6	6.75	1.6467	1.39831
	YPL184C_295	7.1	6.73	8.7	7.59	1.6471	0.85516
	YHR205W_133	6.72	6.75	8.4	8.19	1.6491	1.43907
	YOR065W_34	6.17	5.64	7.8	7.34	1.6495	1.69429
	YDL073W_73	5.77	6.09	7.4	8.44	1.6497	2.347
	YMR257C_326	4.71	4.8	6.4	7.11	1.6638	2.30761
	YGR105W_10	3.76	3.79	5.4	-0.81	1.668	-4.60079
	YOR142W_113	6.54	5.98	8.2	7.26	1.6702	1.28567
	YOR142W_29	6.53	5.97	8.2	6.26	1.6753	0.28939
	YOL012C_63	5.35	4.88	7	6.11	1.685	1.23033
	YDL132W_151	6.75	7.11	8.4	9.02	1.686	1.9109
	YHR009C_56	6.96	7.05	8.7	9.03	1.6938	1.98036
	YDL014W_57	7.9	7.3	9.6	9.55	1.6983	2.24858
	YPL256C_47	6.56	6.36	8.3	8.44	1.7002	2.07643
	YBR024W_63	4.04	4.07	5.7	4.94	1.7084	0.87384
	YDL132W_148	6.75	7.11	8.5	9.02	1.7085	1.91171
	YLR372W_54	7.59	7.29	9.3	9.54	1.7106	2.25524
	YGR041W_130	5.56	5.96	7.3	7.85	1.7177	1.88686
	YNL064C_43	8.3	8.32	10	10.07	1.7192	1.74797
	YPR156C_32	7.1	7.46	8.8	9.47	1.723	2.01191
	YDR066C_40	2.02	2.64	3.7	3.95	1.7236	1.3051
	YOR216C_7	4.95	4.87	6.7	7.26	1.7245	2.3924
	YNL251C_74	6.18	6.09	7.9	8.33	1.7249	2.24154
	YML106W_206	7.4	6.77	9.1	8.58	1.7407	1.81036
	YPL184C_369	7.1	6.73	8.8	7.8	1.7413	1.07061
	YLL027W_65	4.58	4.58	6.3	6.53	1.7458	1.94703
	YLR019W_224	5.21	5.01	7	7.03	1.7464	2.02328
	YGL044C_61	3.91	3.76	5.7	6.27	1.7617	2.5038
	YNL283C_172	5.75	5.37	7.5	6.53	1.7665	1.15566
	YHL011C_32	6.49	6.74	8.3	9.05	1.7691	2.30541
	YDL014W_42	7.9	7.3	9.7	9.56	1.7804	2.26238
	YJL127C_33	4.22	4.59	6	6.4	1.7839	1.80743
	YJL124C_79	5.27	4.87	7.1	7.03	1.7958	2.15716
	YPL177C_47	5.6	5.7	7.4	7.64	1.8024	1.93473
	YDL206W_114	4.52	4.84	6.3	7.4	1.8079	2.56049
	YBR052C_22	6.43	6.72	8.2	8.49	1.8143	1.76798
	YNL263C_42	5.78	5.97	7.6	8.12	1.8147	2.14976
	YEL016C_63	4.99	4.95	6.8	7.79	1.8267	2.84108
	YGL044C_34	3.91	3.76	5.7	6.27	1.836	2.50346
	YGL044C_49	3.91	3.76	5.7	6.27	1.836	2.50346
	YNL156C_49	5.54	5.71	7.4	7.8	1.8398	2.08772
	YNL066W_39	7.91	7.99	9.7	10.39	1.8415	2.40433
	YGR247W_123	3.82	3.95	5.7	6.11	1.8546	2.15892
	YOR142W_80	6.54	5.98	8.4	7.4	1.8552	1.42326
	YDL073W_22	5.77	6.09	7.6	8.5	1.8587	2.41007
	YOR246C_13	6.08	6.08	7.9	8.15	1.8637	2.07459
	YLR372W_28	7.59	7.29	9.5	9.83	1.866	2.54386
	YLR257W_83	6.52	6.59	8.4	8.36	1.8717	1.76962
	YLR273C_160	3.87	4.2	5.7	7.33	1.8739	3.13708
	YGR267C_87	5.96	5.58	7.8	7.27	1.8785	1.69606
	YGL224C_17	4.13	4.3	6	2.95	1.8828	-1.35687
	YPL133C_12	4.12	4.48	6	7.18	1.8863	2.70114
	YDR206W_91	6.3	6.44	8.2	8.77	1.8907	2.33049
	YLR019W_206	5.21	5.01	7.1	7.19	1.8967	2.17807
	YLR006C_26	4.95	5.18	6.9	7.64	1.8997	2.45845
	YPL214C_51	4.73	5.49	6.6	8.19	1.9015	2.69717
	YNL307C_68	6.85	6.28	8.8	8.15	1.9033	1.87142
	YAL014C_34	4.37	4.74	6.3	7.19	1.9095	2.44959
	YBR192W_80	4.51	4.49	6.4	7.41	1.9141	2.9212
	YNL307C_65	6.85	6.28	8.8	8.15	1.9211	1.87142
	YLR152C_127	4.19	4.03	6.1	6.39	1.9402	2.3618
	YKL185W_128	6.64	6.71	8.6	8.69	1.9628	1.97958
	YOR246C_1	6.08	6.08	8.1	8.34	1.984	2.25727
	YNL207W_50	5.16	5.39	7.1	7.52	1.9939	2.13403
	YOL109W_37	8.43	8.24	10.4	8.67	1.9954	0.43012
	YMR257C_299	4.71	4.8	6.7	7.58	1.996	2.77959
	YCR069W_97	5.87	5.99	7.9	6.26	1.9986	0.27137
	YBR028C_25	5.15	4.93	7.2	7.41	2.0269	2.4726
	YGR036C_115	3.4	3.45	5.4	4.53	2.0269	1.07743
	YGR095C_8	3.77	4.02	5.8	5.74	2.0454	1.72019
	YML106W_192	7.4	6.77	9.5	8.94	2.0524	2.16968
	YML106W_170	7.4	6.77	9.5	8.85	2.0631	2.07409
	YNL207W_66	5.16	5.39	7.2	7.64	2.0752	2.25317
	YKL053C-A_54	4.15	4.06	6.2	5.75	2.0782	1.69667
	YLR019W_176	5.21	5.01	7.3	7.47	2.0813	2.45566
	YNL164C_146	3.43	3.93	5.5	5.75	2.0837	1.81602
	YJL164C_81	5.88	5.78	8	7.9	2.0888	2.12326
	YLR229C_36	5.95	5.35	8.1	7.27	2.1057	1.91197
	YDR357C_38	4.6	4.63	6.7	6.85	2.1098	2.21956
	YNL288W_106	4.99	5.08	7.1	6.41	2.1114	1.32869
	YNR055C_242	6.48	6.21	8.6	8.68	2.1313	2.46463
	YMR195W_13	4.94	5.19	7.1	7.33	2.14	2.14388
	YNL307C_23	6.85	6.28	9	8.15	2.1419	1.87134
	YLL010C_65	4.74	4.95	6.9	6.85	2.143	1.89799
	YGR038W_105	5.27	5.16	7.4	7.85	2.1501	2.68448
	YJR044C_43	4.83	4.75	7	5.95	2.1513	1.20055
	YIL050W_22	4.27	4.34	6.4	5.53	2.154	1.19213
	YNR069C_279	2.97	3.97	5.1	6.11	2.1545	2.14383
	YNL291C_61	5.71	5.59	7.9	7.94	2.1716	2.35121
	YPL203W_43	5.47	5.54	7.7	7.54	2.1831	1.99533
	YNR051C_119	6.04	5.87	8.2	7.75	2.2053	1.87856
	YDL243C_457	2.8	2.95	5	6.41	2.2131	3.45671
	YNL066W_21	7.91	7.99	10.1	10.62	2.2192	2.63663
	YML106W_161	7.4	6.77	9.6	9.09	2.2283	2.31728
	YOL028C_94	3.28	3.68	5.5	5.27	2.2354	1.58217
	YNL066W_18	7.91	7.99	10.1	10.64	2.2398	2.65729
	YNL156C_43	5.54	5.71	7.8	8.23	2.2433	2.51792
	YNR051C_110	6.04	5.87	8.3	7.9	2.2554	2.0252
	YGL194C-A_55	3.14	3.27	5.4	7.12	2.2844	3.84181
	YBR192W_65	4.51	4.49	6.8	7.65	2.306	3.16058
	YPL067C_3	3.44	4.44	5.7	7.11	2.3075	2.66468
	YJL164C_63	5.88	5.78	8.2	8.08	2.3172	2.29559
	YKL041W_54	3.91	3.86	6.2	6.64	2.3204	2.78294
	YLR229C_21	5.95	5.35	8.3	7.47	2.3218	2.11317
	YJR044C_37	4.83	4.75	7.2	6.41	2.3247	1.65884
	YOR152C_138	3.62	4.17	5.9	6.94	2.3254	2.77486
	YLR152C_109	4.19	4.03	6.5	7.02	2.3263	2.98587
	YOR247W_104	7.55	7.37	9.9	9.43	2.3282	2.06167
	YHR129C_56	3.83	3.84	6.2	7.03	2.3478	3.1909
	YHR129C_62	3.83	3.84	6.2	6.94	2.3478	3.10416
	YBR043C_85	4.88	5.14	7.2	8.28	2.3537	3.13977
	YNL291C_25	5.71	5.59	8.1	8.3	2.3563	2.71038
	YNL291C_22	5.71	5.59	8.1	8.3	2.3706	2.71041
	YEL023C_104	3.72	3.79	6.1	7.86	2.4027	4.06259
	YGL256W_437	4.47	4.72	6.9	6.64	2.4103	1.92229
	YBR125C_51	4.86	5.35	7.3	8.09	2.4217	2.74103
	YOL018C_22	4.32	4.24	6.7	7.35	2.4314	3.111
	YDR121W_96	3.74	3.91	6.2	5.94	2.4352	2.02614
	YPL179W_83	6.25	6.34	8.7	8.96	2.4399	2.61563
	YPR085C_43	3.5	4.22	5.9	5.26	2.451	1.04422
	YBR082C_45	6.69	7.05	9.1	8.03	2.4544	0.97968
	YDR387C_67	4.46	4.72	7	8.31	2.5186	3.58638
	YNR028W_50	4.55	4.29	7.1	6.94	2.519	2.64823
	YML081C-A_40	4.58	4.55	7.1	7.95	2.5207	3.39685
	YPR109W_90	4.19	4.27	6.7	7.53	2.5231	3.25296
	YLR152C_97	4.19	4.03	6.7	7.18	2.5237	3.14752
	YDR357C_22	4.6	4.63	7.1	6.93	2.5243	2.30653
	YGL063W_129	2.98	3.13	5.5	6.54	2.5351	3.40723
	YNL191W_29	4.13	4.88	6.7	7.8	2.5397	2.92007
	YGR247W_100	3.82	3.95	6.4	6.85	2.5621	2.89297
	YPR036W-A_32	5.65	6.29	8.2	7.18	2.5758	0.8856
	YLR297W_64	2.64	3.37	5.2	5.26	2.5947	1.88384
	YPL148C_121	1.59	3.19	4.2	7.33	2.6367	4.14948
	YPL179W_47	6.25	6.34	8.9	9.13	2.6646	2.78509
	YNL066W_29	7.91	7.99	10.6	10.8	2.681	2.81025
	YNL145W_11	6.36	5.37	9	7.33	2.6814	1.96242
	YLR242C_63	3.75	3.7	6.5	7.65	2.7144	3.95425
	YPL177C_17	5.6	5.7	8.3	8.23	2.7145	2.5241
	YLR097C_50	3.88	4.22	6.6	7.27	2.7165	3.04082
	YGR181W_27	4.24	3.96	7	6.64	2.7428	2.68039
	YNL156C_16	5.54	5.71	8.3	8.91	2.7453	3.20257
	YLR016C_4	3.56	4.04	6.3	7.54	2.7727	3.49891
	YNL066W_5	7.91	7.99	10.7	10.89	2.799	2.90183
	YHR050W_115	5.85	5.98	8.6	9.33	2.7994	3.35818
	YIR031C_24	3.98	4.24	6.8	7.47	2.7997	3.22725
	YMR010W_118	5.66	5.29	8.5	8.3	2.841	3.01631
	YDR357C_13	4.6	4.63	7.4	7.46	2.8468	2.83219
	YIL119C_99	5.89	5.39	8.7	8.58	2.8525	3.19544
	YNR055C_197	6.48	6.21	9.4	9.79	2.8801	3.57466
	YNL156C_1	5.54	5.71	8.4	9.15	2.887	3.44011
	YNL156C_4	5.54	5.71	8.4	9.15	2.887	3.44011
	YLR453C_31	2.23	2.68	5.1	2.94	2.8911	0.26543
	YBR120C_21	3.12	3.04	6	5.26	2.8926	2.22928
	YPL177C_11	5.6	5.7	8.5	8.82	2.9105	3.11746
	YKL053C-A_11	4.15	4.06	7.1	8.4	2.9172	4.34384
	YGR267C_14	5.96	5.57	8.9	9.2	2.9186	3.62396
	YGR267C_8	5.96	5.57	8.9	9.26	2.927	3.68551
	YNL288W_73	4.99	5.08	7.9	8.53	2.9468	3.45465
	YLR040C_6	3	2.52	5.9	5.26	2.947	2.7437
	YKL183W_43	4.38	4.09	7.4	7.53	2.9788	3.43842
	YNL251C_53	6.18	6.09	9.2	9.31	2.9832	3.214
	YKL053C-A_42	4.15	4.06	7.2	8.27	2.9987	4.21141
	YHR043C_38	4.78	4.91	7.8	7.91	3.0003	2.99979
	YHR059W_20	2.59	2.87	5.6	-0.81	3.0027	-3.68527
	YNL251C_47	6.18	6.09	9.2	9.34	3.0168	3.24887
	YNL288W_37	4.99	5.08	8	8.78	3.0243	3.70722
	YDL177C_36	2.48	2.73	5.6	7.26	3.1113	4.52866
	YOR180C_13	2.54	2.8	5.7	6.4	3.1299	3.6035
	YNL251C_14	6.18	6.09	9.3	9.44	3.1312	3.35118
	YGL032C_47	3.79	3.39	6.9	7.75	3.155	4.35424
	YAR023C_971	2.05	2.07	5.2	5.53	3.1839	3.46045
	YEL039C_68	2.14	3.58	5.3	6.12	3.1904	2.53973
	YMR181C_25	2.59	3.03	5.8	3.94	3.228	0.9114
	YJL139C_29	3.55	3.82	6.8	7.59	3.2349	3.7731
	YMR034C_109	2.42	2.99	5.7	7.2	3.2522	4.20674
	YJL124C_53	5.27	4.88	8.6	8.7	3.3022	3.82258
	YMR166C_151	3.39	3.84	6.7	7.27	3.3224	3.42322
	YPL071C_30	3.03	3.47	6.4	7.94	3.3902	4.47009
	YNL024C-A_29	3.57	3.56	7	6.85	3.411	3.2881
	YDR265W_39	3.52	4.01	6.9	8.19	3.4268	4.17456
	YER115C_10	3.16	3.35	6.6	7.52	3.4384	4.17589
	YLR037C_184	0.75	1.54	4.2	6.12	3.4845	4.5841
	YGR168C_16	3.5	3.93	7	6.84	3.5074	2.91263
	YMR166C_124	3.39	3.84	7	7.46	3.6215	3.62291
	YHR138C_2	3.22	3.97	6.9	7.59	3.6285	3.61362
	YAR023C_932	2.05	2.07	5.7	5.75	3.6985	3.6827
	YBR194W_17	1.91	3.06	5.7	6.41	3.8382	3.34713
	YGL146C_34	2.29	3.19	6.1	7.2	3.8406	4.01128
	YMR034C_102	2.42	2.99	6.3	7.65	3.8624	4.66096
	YIL059C_496	1.66	1.75	5.6	6.66	3.9409	4.91194
	YGR122C-A_56	1.43	1.25	5.5	5.26	4.0805	4.01162
	YPL096C-A_20	2.34	2.6	6.4	7.41	4.0857	4.80625
	YMR182C_31	-0.59	1.07	3.7	-0.81	4.334	-1.87715
	YPL148C_93	1.59	3.18	6.1	9.01	4.5312	5.82655
	YGL032C_28	3.79	3.39	8.4	9.67	4.5612	6.27786
	YCR045W-A_84	1.56	1.24	6.2	5.27	4.62	4.02484
	YIL029C_21	1.2	1.51	6	6.65	4.8055	5.13938
	YIL029C_12	1.2	1.51	6.1	6.76	4.921	5.24476
	YMR148W_170	3.33	3.5	8.3	8.67	4.9634	5.16991
	YPL034W_33	2.62	2.86	7.6	7.8	4.9948	4.94879
	YNL211C_28	1.68	1.83	6.9	7.59	5.1671	5.76235
	YOL038C-A_38	-0.71	0.81	5.5	7.03	6.2191	6.21675
	YDR133C_151	7.04	6.85	15.1	15.83	8.0814	8.985
	YDR133C_85	7.04	6.85	15.7	16.47	8.6409	9.61806
	YDR133C_52	7.04	6.85	15.8	16.61	8.8014	9.75633
	YDR133C_4	7.04	6.85	15.8	16.61	8.8076	9.75846

## Sheet: Sheet 4
	mORF name	mrna30 (log2)	mrna20 (log2)	ribo30 (log2)	ribo20 (log2)	te30 (log2)	te20 (log2)
	YAL067C	4.5	4.6	2.377	2.8507	-2.15855	-1.70957
	YAL063C	7.3	7.6	4.089	5.3766	-3.23201	-2.19926
	YAL054C	6.9	6.9	3.963	4.9138	-2.91978	-1.96852
	YAL049C	8.9	9	9.616	9.5492	0.743615	0.598057
	YAL047C	7.4	7.2	7.209	7.1228	-0.143252	-0.029177
	YAL046C	7.7	7.1	8.006	7.5496	0.35409	0.443481
	YAL044C	10.6	11.5	12.12	12.9121	1.51422	1.45284
	YAL043C	9.7	9.3	9.778	9.5708	0.103321	0.277951
	YAL040C	9.6	9.8	8.773	8.958	-0.8675	-0.859922
	YAL039C	8	8.7	9.489	10.0282	1.53263	1.34283
	YAL036C	9.5	8.8	10.354	9.3557	0.818429	0.544659
	YAL034C	7.5	7.9	6.938	7.3333	-0.516211	-0.57542
	YAL032C	7.4	7.3	7.794	7.9486	0.419666	0.627813
	YAL031C	8.3	8.5	7.671	7.9463	-0.671086	-0.526627
	YAL029C	11	11	8.649	8.6258	-2.38621	-2.37296
	YAL026C-A	7	7.1	4.276	5.1098	-2.76234	-1.99735
	YAL026C	10.8	11	9.643	9.9556	-1.15595	-1.072
	YAL025C	8.1	7.6	8.998	8.5929	0.855934	0.997638
	YAL024C	9.3	9.2	7.426	7.5365	-1.8989	-1.61822
	YAL023C	12.2	12	12.211	11.9953	0.039623	0.031659
	YAL022C	9.4	9.3	9.562	9.62	0.182038	0.326982
	YAL021C	10.5	10.4	10.744	10.948	0.255239	0.568962
	YAL020C	7.7	7.1	6.944	6.1146	-0.791805	-1.01473
	YAL015C	7.3	7.2	7.071	6.8702	-0.18461	-0.287941
	YAL014C	7.7	7.8	7.966	7.8423	0.256079	0.040074
	YAL010C	6.9	6.9	7.033	6.8568	0.110884	-0.023501
	YAL007C	9.4	9.3	10.24	10.1944	0.87349	0.861065
	YAL005C	16.1	15.9	17.169	17.0526	1.10327	1.15807
	YAL001C	9.7	10.1	8.426	8.5729	-1.2459	-1.53745
	YAR002C-A	10.2	10	10.422	10.4249	0.197982	0.451177
	YAR007C	9.9	9.8	10.698	10.7567	0.830272	0.923881
	YAR014C	9.6	9.3	9.578	9.4259	-0.050853	0.08929
	YAR018C	8.5	8	7.981	7.527	-0.47253	-0.512646
	YAR019C	8.2	8.2	6.804	6.9201	-1.38269	-1.3061
	YAR023C	5.5	5.6	1.502	0.9775	-4.03788	-4.60174
	YAL064W-B	4.6	4.4	-2.077	-4.7746	-6.69441	-9.13509
	YAL062W	6.5	5.6	5.562	6.1421	-0.909904	0.531923
	YAL061W	8.3	9.1	8.474	9.1864	0.167779	0.046955
	YAL060W	10.3	10.5	10.529	10.3248	0.19063	-0.174835
	YAL059W	7.3	6.9	8.098	7.8054	0.782044	0.931231
	YAL058W	8.6	8	7.513	7.0552	-1.1231	-0.917096
	YAL056W	9.5	10	7.259	7.867	-2.21926	-2.10732
	YAL055W	5.8	5.9	6.473	6.0751	0.632097	0.197733
	YAL053W	10.4	10.5	10.054	10.4984	-0.300712	-0.017437
	YAL051W	8.9	8.9	8.377	8.3423	-0.545375	-0.557656
	YAL044W-A	7.2	6.6	8.649	8.3076	1.47605	1.7498
	YAL042W	10.6	10.6	10.377	10.3204	-0.245229	-0.294203
	YAL041W	9.4	9.2	9.121	9.1434	-0.271432	-0.087053
	YAL038W	17	17.2	17.76	18.1538	0.741031	0.924271
	YAL037W	4.9	5.8	3.507	4.5962	-1.43864	-1.21778
	YAL035W	12.5	12.2	12.957	12.6326	0.459415	0.410585
	YAL034W-A	6	5.9	5.855	6.3371	-0.123276	0.484242
	YAL033W	7.7	7.5	7.527	7.2564	-0.152806	-0.254348
	YAL030W	7.5	7.2	8.64	8.2591	1.14969	1.02357
	YAL028W	7.1	7.4	6.35	6.7976	-0.71552	-0.643363
	YAL027W	6.2	6.7	6.55	6.9642	0.31229	0.251126
	YAL019W	10	9.6	9.966	9.3866	-0.075316	-0.242256
	YAL017W	10.6	11	9.578	9.944	-0.976965	-1.00849
	YAL016W	10.8	10.7	11.518	11.5811	0.763896	0.861811
	YAL013W	8.1	8	8.709	8.5637	0.565999	0.542284
	YAL012W	11.5	11.2	13.424	13.1374	1.8768	1.97818
	YAL011W	7.3	7.3	6.471	6.6038	-0.795833	-0.658079
	YAL009W	7.2	7.1	6.439	6.2459	-0.720985	-0.851222
	YAL008W	7.8	8.1	9.118	9.2328	1.30246	1.11838
	YAL003W	13.5	12.8	15.136	14.5606	1.68071	1.72904
	YAL002W	9.5	9.6	7.259	7.4599	-2.25922	-2.12265
	YAR002W	9.2	8.9	10.322	10.0659	1.13411	1.12507
	YAR003W	8.1	8.4	7.172	7.0846	-0.955855	-1.32558
	YAR008W	6.8	6.6	6.329	6.3478	-0.47738	-0.256064
	YAR015W	11.1	12.4	11.754	13.2401	0.694449	0.851367
	YAR027W	8.2	8.5	9.101	9.4078	0.89511	0.926301
	YAR028W	7.6	7.4	7.95	7.945	0.320721	0.501329
	YAR031W	7.4	6.7	7.225	6.7751	-0.183455	0.068155
	YAR033W	6.7	6.6	7.155	7.2816	0.454137	0.655248
	YAR035W	6.8	6.9	5.789	4.9925	-0.966879	-1.87778
	YAR042W	10.4	10	9.615	9.6485	-0.796841	-0.387404
	YAR050W	7.8	8.2	3.896	5.495	-3.89613	-2.71942
	YAR071W	7.5	8.1	6.918	7.3796	-0.578217	-0.679615
	YBL113C	12.4	12.5	8.035	8.4559	-4.31923	-4.05717
	YBL107C	6.6	7.4	7.383	7.784	0.805544	0.386735
	YBL106C	8.6	8.7	7.034	6.1112	-1.58673	-2.54282
	YBL105C	10.2	10.4	9.181	9.3709	-1.0613	-0.994439
	YBL104C	9	9	7.275	7.2086	-1.76357	-1.7894
	YBL103C	7.6	7.6	8.209	8.416	0.618608	0.769481
	YBL101C	10.2	10.5	9.112	9.3838	-1.04112	-1.07426
	YBL093C	7.7	7.8	8.68	8.6381	0.969168	0.84248
	YBL091C-A	6.6	6.9	7.38	7.5975	0.74088	0.733609
	YBL091C	10.4	10.2	10.924	10.9219	0.545985	0.711562
	YBL088C	10	10.1	6.408	6.949	-3.56686	-3.1443
	YBL087C	12.7	12	13.906	13.0493	1.18641	1.04819
	YBL086C	7.2	7.5	7.901	8.2668	0.684935	0.720476
	YBL084C	8.1	8.5	7.517	7.8547	-0.631456	-0.614927
	YBL080C	7.5	7.7	6.894	7.4039	-0.580449	-0.309576
	YBL078C	6	6.6	8.03	9.0642	2.01166	2.42609
	YBL076C	13.8	13.4	13.308	12.9281	-0.504641	-0.46964
	YBL075C	8.1	7.7	3.004	4.1202	-5.05864	-3.59254
	YBL074C	7.2	6.7	6.423	6.1338	-0.790451	-0.591263
	YBL072C	14.6	14	15.453	14.9065	0.83011	0.891033
	YBL067C	9.3	9.5	8.082	8.2012	-1.25637	-1.30028
	YBL066C	8.8	8.6	7.548	7.7003	-1.24962	-0.893418
	YBL064C	9.6	10	10.534	11.0575	0.923248	1.06838
	YBL061C	9.2	8.9	8.881	8.7418	-0.293798	-0.176423
	YBL059C-A	7	7.1	7.911	7.8281	0.905175	0.761194
	YBL057C	8.1	7.7	8.34	8.1243	0.241566	0.445211
	YBL055C	8.2	8.2	8.06	8.0326	-0.142829	-0.145222
	YBL052C	9.1	9.4	6.15	6.6919	-2.91414	-2.72974
	YBL051C	10.1	10.4	10.893	11.4924	0.782074	1.07964
	YBL047C	12	12	12.905	12.6871	0.869713	0.690236
	YBL045C	10.6	10.5	11.903	11.8599	1.28374	1.37342
	YBL042C	10.1	9.1	10.265	9.2743	0.185613	0.180611
	YBL040C	8.9	8.8	9.418	9.3836	0.512111	0.585125
	YBL039C	11.2	10.6	11.347	10.8336	0.17788	0.201482
	YBL036C	8.9	8.4	9.62	9.2417	0.764526	0.811339
	YBL035C	8.5	8.5	9.083	9.279	0.60212	0.797974
	YBL034C	9.4	9.2	8.635	8.5474	-0.757963	-0.625696
	YBL033C	8.1	8.2	9.081	9.0738	0.942284	0.888543
	YBL030C	11.8	11.6	12.928	12.7122	1.16099	1.14657
	YBL029C-A	5.7	5.7	7.848	7.9385	2.12741	2.19033
	YBL028C	7.4	6.6	8.345	7.6846	0.953319	1.05823
	YBL023C	9.5	9.3	9.459	9.2059	-0.031586	-0.088016
	YBL022C	11.3	11.4	11.44	11.3265	0.096107	-0.043113
	YBL021C	6	5.9	7.131	6.798	1.15885	0.944964
	YBL018C	7.3	7	7.275	6.9364	0.003337	-0.108548
	YBL017C	11.8	12.3	11.13	11.5734	-0.715038	-0.76727
	YBL014C	8.6	8.6	5.871	6.5246	-2.72444	-2.02632
	YBL010C	6.6	6.3	7.21	7.1215	0.633599	0.803298
	YBL007C	12.1	11.9	12.487	12.2121	0.348271	0.300716
	YBL006C	8	8.2	8.771	8.4154	0.784836	0.212438
	YBL003C	11.6	11.6	12.741	12.7159	1.17626	1.09787
	YBL001C	8.8	8.7	9.877	9.8363	1.04754	1.08993
	YBR001C	9.6	9.4	8.875	8.6801	-0.700774	-0.690903
	YBR002C	7.8	7.8	7.257	7.4904	-0.504585	-0.320148
	YBR004C	7.8	8	7.462	7.7941	-0.288222	-0.205375
	YBR007C	8	8.1	8.265	8.5075	0.309125	0.358644
	YBR008C	7.6	8.1	-0.495	-0.0332	-8.11188	-8.08985
	YBR009C	11.6	11.4	13.028	13	1.41707	1.56548
	YBR011C	13.2	12.7	14.281	13.9941	1.1251	1.26702
	YBR012C	5.6	5.2	3.648	1.7957	-1.97223	-3.35556
	YBR013C	6.3	6.3	6.646	6.9401	0.390476	0.637489
	YBR014C	8.2	8.3	9.107	9.1932	0.911757	0.84454
	YBR015C	10.7	10.5	10.434	10.4704	-0.308215	-0.018293
	YBR017C	10.9	10.5	10.419	10.1683	-0.531336	-0.317083
	YBR018C	4.5	4.4	1.908	2.5767	-2.61897	-1.82377
	YBR019C	4	3.9	2.614	2.5761	-1.43308	-1.33633
	YBR023C	10.8	10.8	9.99	9.8401	-0.789247	-0.948997
	YBR025C	12.7	12.2	13.489	13.0396	0.82434	0.842282
	YBR026C	9.7	9.7	10.42	10.6265	0.755584	0.879682
	YBR028C	8.6	9	8.082	8.5761	-0.513052	-0.469009
	YBR029C	10	9.8	10.529	10.357	0.483238	0.563196
	YBR034C	9.1	9.4	9.574	10.0714	0.511943	0.622203
	YBR035C	9.8	9.9	10.949	11.064	1.13197	1.13423
	YBR036C	10.4	10.5	10.254	10.3826	-0.129199	-0.158208
	YBR037C	8.1	8.1	8.581	8.861	0.432077	0.753096
	YBR042C	8.6	8.6	8.132	8.4483	-0.445149	-0.200256
	YBR043C	8.3	8.5	6.231	6.1219	-2.11655	-2.40729
	YBR044C	8.2	7.9	6.975	7.1231	-1.21814	-0.806248
	YBR045C	6.5	6.6	5.003	4.4885	-1.53289	-2.08962
	YBR046C	8.3	8.7	9.187	9.7226	0.904664	0.993862
	YBR049C	9.8	9.7	10.655	10.2393	0.870979	0.57606
	YBR050C	3.6	4.3	2.729	3.2197	-0.864312	-1.05696
	YBR052C	9.9	10	10.191	10.1705	0.313809	0.142134
	YBR053C	9.4	9.3	9.924	9.8704	0.534921	0.593457
	YBR055C	9.3	9.1	8.48	8.1529	-0.779837	-0.967562
	YBR057C	7.8	8	8.68	8.9069	0.857499	0.945106
	YBR058C	9.6	9.3	9.865	9.6192	0.239032	0.310707
	YBR058C-A	6.5	6.5	9.285	9.1569	2.82257	2.66856
	YBR059C	10.8	10.8	10.348	10.2431	-0.469828	-0.537657
	YBR060C	8.1	8	8.098	7.8842	-0.006463	-0.155428
	YBR061C	8.1	7.5	9.086	8.7198	1.03205	1.25
	YBR062C	7.2	6.7	8.529	8.0115	1.36574	1.35365
	YBR063C	7.8	7.7	-0.498	0.9739	-8.31674	-6.7335
	YBR065C	7.6	7.2	7.218	7.2671	-0.379591	0.058839
	YBR066C	7.6	7.4	8.486	8.1465	0.907659	0.756792
	YBR067C	11.4	11.2	13.498	13.4625	2.08801	2.2128
	YBR068C	11.1	11	10.981	10.8143	-0.163531	-0.165879
	YBR069C	10.8	10.7	10.484	10.3628	-0.299541	-0.381453
	YBR070C	7.3	6.9	7.037	6.5607	-0.2616	-0.354551
	YBR076C-A	5.1	5	2.564	1.5025	-2.5229	-3.50095
	YBR077C	7.9	7.6	8.43	8.0643	0.533561	0.425016
	YBR079C	12.2	12.1	12.213	12.2955	-0.018403	0.164755
	YBR080C	10.6	10.6	11.269	11.4156	0.68062	0.814569
	YBR081C	9.8	9.7	8.42	8.5924	-1.37525	-1.09766
	YBR082C	10.1	10	12.755	12.5363	2.66588	2.5146
	YBR084C-A	13.6	12.8	14.448	13.5197	0.817804	0.732099
	YBR085C-A	9.5	8.4	10.9	9.5064	1.44224	1.07583
	YBR086C	11.6	11.8	11.217	11.4456	-0.339492	-0.324285
	YBR088C	9.6	9.8	10.506	10.8647	0.876251	1.03022
	YBR089C-A	7.9	7.8	9.476	9.3783	1.53483	1.56662
	YBR091C	6.6	6.4	7.814	7.7787	1.20325	1.36381
	YBR092C	12.4	12	12.456	12.1009	0.034341	0.146488
	YBR093C	9.5	9.3	10.158	10.0143	0.636514	0.721366
	YBR095C	7.5	7.7	7.781	8.0465	0.260527	0.340679
	YBR101C	9	8.5	9.691	9.053	0.660888	0.533022
	YBR102C	8.8	8.7	8.883	8.815	0.093292	0.147051
	YBR105C	7	7.8	7.452	8.4803	0.4272	0.670344
	YBR107C	5.9	6	4.93	4.7432	-0.974798	-1.30176
	YBR109C	10.2	10	12.018	11.7838	1.78588	1.75386
	YBR111C	9.7	9.9	10.961	11.0342	1.23642	1.11987
	YBR112C	11.5	10.4	11.246	11.1006	-0.260329	0.658648
	YBR115C	11.7	11.6	11.759	11.7099	0.075143	0.125461
	YBR120C	6.6	6.9	8.048	8.2465	1.42569	1.30941
	YBR121C	12.7	12.4	12.839	12.4251	0.092262	0.040262
	YBR122C	7.9	8.1	8.931	9.0147	0.995681	0.942208
	YBR123C	8.5	8.5	8.629	8.4818	0.157744	0.029733
	YBR125C	8.3	8.1	7.407	7.381	-0.873788	-0.725402
	YBR126C	11.8	11.9	12.967	13.1742	1.16415	1.25066
	YBR127C	13.3	13.4	13.945	14.2037	0.690439	0.84902
	YBR128C	5.8	5.6	4.839	4.799	-0.922353	-0.8492
	YBR129C	8	8.1	7.546	7.4115	-0.48094	-0.721021
	YBR130C	8.7	8.6	9.361	9.1753	0.635078	0.610453
	YBR132C	9.4	9.9	8.996	9.5428	-0.388888	-0.318441
	YBR133C	9.9	10	8.656	8.817	-1.28613	-1.2265
	YBR138C	7.8	7.8	8.204	8.3596	0.437346	0.52029
	YBR140C	11.7	11.8	9.115	9.5946	-2.60229	-2.24734
	YBR141C	5.9	5.6	6.527	5.8922	0.592297	0.323965
	YBR143C	11.5	11.3	11.94	11.845	0.478195	0.580504
	YBR150C	8.6	8.8	7.549	7.8226	-1.06771	-0.974955
	YBR154C	9.4	9.1	10.757	10.3363	1.3775	1.2275
	YBR156C	7.5	7.3	7.725	7.6518	0.235352	0.401151
	YBR157C	6.9	6.8	7.789	7.4594	0.90772	0.631649
	YBR162C	12.6	12.7	12.354	12.5623	-0.211847	-0.146547
	YBR164C	9.1	9.1	9.446	9.4638	0.309774	0.352656
	YBR166C	8.7	9	8.504	8.7583	-0.153876	-0.200124
	YBR167C	5	5.1	6.009	5.9785	1.00184	0.834801
	YBR169C	10.2	10.7	10.329	10.916	0.159141	0.199739
	YBR170C	9.1	9.2	9.441	9.5493	0.364801	0.3719
	YBR172C	9.3	9	9.847	9.6191	0.516934	0.580876
	YBR173C	8.3	8.2	10.289	10.2169	1.96298	1.9993
	YBR177C	10.6	10.5	11.468	11.6262	0.865748	1.07813
	YBR179C	8.9	9	8.47	8.7168	-0.463481	-0.298461
	YBR181C	14.5	13.8	15.344	14.5777	0.797884	0.77466
	YBR182C	6	6.4	5.54	6.7344	-0.423797	0.357587
	YBR185C	7.8	7.9	8.422	8.7127	0.628888	0.850421
	YBR188C	5.9	5.9	7.302	7.0319	1.44171	1.13774
	YBR193C	6.7	6.9	7.998	7.9623	1.26264	1.08303
	YBR195C	7.6	7.4	7.664	7.6426	0.093502	0.192805
	YBR196C	14.8	14.9	15.687	15.887	0.856751	0.969125
	YBR197C	7	6.6	7.262	6.9898	0.294749	0.364883
	YBR198C	9.6	9.5	9.7	9.6124	0.1173	0.111206
	YBR201C-A	3.8	3.9	5.282	5.593	1.451	1.66431
	YBR204C	7.7	8.1	7.573	8.1779	-0.107757	0.077729
	YBR208C	9.6	11.7	7.715	11.0078	-1.85859	-0.646923
	YBR211C	7.1	7	7.232	7.5059	0.177315	0.510356
	YBR216C	8.5	8.7	8.214	8.2573	-0.263395	-0.392983
	YBR218C	12.4	12.9	11.466	12.156	-0.945324	-0.69651
	YBR221C	11.7	11.8	12.214	12.3114	0.515003	0.501556
	YBR222C	10.1	10.4	10.668	10.8763	0.558685	0.469206
	YBR223C	7.5	7.8	5.7	6.4578	-1.77598	-1.32569
	YBR229C	10.5	10.6	9.903	9.9799	-0.605523	-0.576287
	YBR230C	8.5	8.4	10.314	9.9353	1.76556	1.5752
	YBR231C	7.8	7.4	8.017	7.7705	0.219921	0.411544
	YBR234C	10.8	10.7	11.078	11.0507	0.314804	0.320453
	YBR236C	8.8	8.3	8.901	8.5617	0.130001	0.261485
	YBR238C	8.6	9	8.415	9.2353	-0.213574	0.198231
	YBR239C	7	7	6.797	6.3116	-0.191684	-0.694765
	YBR240C	6.4	7.2	5.296	6.2685	-1.14391	-0.926955
	YBR241C	8.4	8.8	8.402	8.9484	0.038997	0.114257
	YBR243C	9.3	9.2	9.066	8.7362	-0.240403	-0.500281
	YBR245C	10.3	10.3	10.522	10.5215	0.260989	0.267937
	YBR247C	8.9	8.2	9.366	8.9823	0.425546	0.733239
	YBR248C	10.1	10.1	10.342	10.271	0.213829	0.15423
	YBR249C	11.6	11.4	12.874	12.6657	1.31853	1.28619
	YBR254C	6.9	6.7	7.827	7.7642	0.898272	1.06802
	YBR255C-A	5.8	6.4	6.69	7.0145	0.840447	0.57218
	YBR256C	9.3	9.3	9.016	8.7241	-0.326163	-0.556838
	YBR258C	5.9	6.1	5.964	6.3268	0.06596	0.213896
	YBR260C	8.8	8.8	8.973	9.2589	0.148239	0.443192
	YBR261C	8.4	7.9	9.474	8.6079	1.04436	0.704116
	YBR262C	7.1	7.4	7.364	7.6361	0.311409	0.238743
	YBR264C	7.2	7.1	7.432	7.1786	0.27724	0.028648
	YBR269C	7.7	7.4	9.205	9.0348	1.53991	1.60875
	YBR270C	6.4	7	5.247	5.7063	-1.12368	-1.26154
	YBR272C	8.3	8.3	7.976	8.0886	-0.327934	-0.195764
	YBR273C	8.5	8.3	9.594	9.3687	1.11421	1.05647
	YBR275C	10	10	8.614	8.6099	-1.3517	-1.37262
	YBR276C	9.8	10	6.857	7.3251	-2.9041	-2.66565
	YBR280C	7.9	8.2	7.615	7.8194	-0.261125	-0.354875
	YBR281C	9.3	9	8.577	8.4604	-0.755175	-0.580988
	YBR283C	11.5	11.5	11.662	11.7903	0.199194	0.302277
	YBR288C	9.1	9.1	8.728	8.676	-0.403007	-0.404695
	YBR291C	6.5	6.6	6.516	6.1288	0.034486	-0.442452
	YBR298C	7	7.1	-0.081	-0.0266	-7.11259	-7.08164
	YBL102W	9.1	9.2	9.4	9.4088	0.287091	0.228521
	YBL099W	12.7	12.7	13.54	13.548	0.870741	0.878845
	YBL098W	9.2	10.5	9.349	10.5862	0.160265	0.102134
	YBL097W	8.7	8.3	7.024	7.0682	-1.71968	-1.26155
	YBL095W	8	7.8	6.373	6.6099	-1.66469	-1.22072
	YBL092W	13.8	13.1	14.974	14.3098	1.21102	1.20792
	YBL090W	7.1	7.4	8.159	8.3187	1.09392	0.885272
	YBL089W	7.6	7.9	7.263	7.4243	-0.346413	-0.431478
	YBL085W	9.5	9.5	9.607	9.4792	0.114156	-0.016281
	YBL081W	7.1	7.3	8.518	8.5645	1.40097	1.26005
	YBL079W	11.2	10.8	9.616	9.5836	-1.58777	-1.26451
	YBL071W-A	5.7	4.6	7.997	6.9361	2.31733	2.3812
	YBL068W	8.5	7.9	9.055	8.4789	0.507547	0.564336
	YBL063W	8.8	8.7	7.737	7.9718	-1.09882	-0.690172
	YBL060W	7.4	7.4	7.053	6.3826	-0.380142	-1.01249
	YBL059W	6	6.2	6.302	6.1983	0.290851	-0.041683
	YBL058W	10.4	10.2	11.528	11.3709	1.1402	1.18674
	YBL056W	10.6	11	10.161	10.5396	-0.469092	-0.482562
	YBL054W	7.1	6.6	7.813	7.2582	0.732944	0.642416
	YBL050W	9.4	9.6	10.474	10.6611	1.11964	1.03064
	YBL046W	7.5	7.2	8.037	7.8122	0.570531	0.600077
	YBL041W	10.1	10.1	11.253	11.1733	1.12047	1.04841
	YBL039W-B	4.3	5.3	5.083	5.626	0.759299	0.341395
	YBL038W	7.7	8.1	8.699	9.0277	0.96318	0.918114
	YBL037W	9.3	9.5	8.606	9.1671	-0.740275	-0.324648
	YBL032W	10.4	10.1	11.043	10.8638	0.635391	0.727252
	YBL031W	6.6	6.7	6.98	6.6492	0.388183	-0.073085
	YBL029W	5.9	7	7.175	8.2699	1.23458	1.26884
	YBL027W	13.8	13	14.669	13.9128	0.87873	0.876967
	YBL026W	7.8	7.9	8.228	8.4703	0.407753	0.592144
	YBL025W	5.1	5.3	6.758	6.8231	1.65295	1.53706
	YBL024W	10.7	10.6	11.204	11.1572	0.502996	0.578414
	YBL020W	8.9	9	8.014	8.1897	-0.915635	-0.82088
	YBL019W	6.9	7.1	6.007	6.5001	-0.927638	-0.606649
	YBL016W	8.2	8.7	8.517	9.1342	0.297324	0.45029
	YBL015W	9.2	9.2	9.794	9.7017	0.619699	0.490368
	YBL011W	9.9	10	8.868	9.0352	-1.00287	-0.948994
	YBL009W	8.6	8.3	8.767	8.53	0.134572	0.20881
	YBL008W	8.2	8.2	7.439	7.2848	-0.792749	-0.915827
	YBL005W	8.3	9.3	7.32	8.2089	-0.992713	-1.09355
	YBL004W	12.1	11.7	10.744	10.5549	-1.38754	-1.19423
	YBL002W	10.9	10.5	13.04	12.688	2.13348	2.17872
	YBR003W	8.9	9	8.649	9.2139	-0.267977	0.22721
	YBR005W	7.1	6.8	7.014	6.9575	-0.071944	0.200195
	YBR006W	8.1	8.6	8.236	8.9502	0.157115	0.334322
	YBR010W	12.1	12.1	13.539	13.672	1.47045	1.60248
	YBR016W	8	8	10.458	10.7207	2.4761	2.75408
	YBR020W	6.5	6.5	0.506	-4.7746	-6.01117	-11.2808
	YBR021W	8.8	8.2	8.454	7.6447	-0.369344	-0.505874
	YBR022W	6.9	7	7.479	7.6116	0.565152	0.575354
	YBR024W	7.5	8.2	7.776	8.4391	0.284865	0.25758
	YBR030W	8.3	8.1	6.621	6.9016	-1.63079	-1.1841
	YBR031W	14.7	14	16.179	15.4115	1.45668	1.37518
	YBR033W	4.5	6	3.824	4.7468	-0.724943	-1.29709
	YBR038W	10.8	10.6	10.845	10.815	0.044472	0.259427
	YBR039W	10.4	10.4	11.739	11.6444	1.29494	1.28434
	YBR041W	10.1	10.5	9.531	10.1583	-0.548464	-0.329258
	YBR047W	4.4	5.6	5.112	6.2607	0.710329	0.636759
	YBR048W	13	12.2	14.531	13.6748	1.57434	1.46941
	YBR054W	12	11.5	12.309	11.5988	0.339801	0.143295
	YBR056W	10.1	10.3	9.936	10.3767	-0.203947	0.050715
	YBR056W-A	3.5	4.7	4.589	5.1469	1.06623	0.410661
	YBR071W	8	7.8	9.507	9.3484	1.53802	1.53459
	YBR072W	9.3	9.7	11.021	11.4771	1.7109	1.78506
	YBR073W	10.2	10.3	9.657	9.8296	-0.549335	-0.51612
	YBR074W	10.5	10.3	9.547	9.3045	-0.977104	-0.972824
	YBR078W	14	14	14.603	14.7711	0.646771	0.73026
	YBR083W	8.5	8.5	9.415	9.084	0.946612	0.631776
	YBR084W	11.8	10.6	11.477	10.3258	-0.339955	-0.283498
	YBR085W	5.9	5.8	6.334	6.4182	0.413101	0.570069
	YBR087W	8.6	8.4	8.748	8.5424	0.13659	0.186863
	YBR094W	9.3	9.1	8.612	8.7056	-0.664476	-0.391609
	YBR096W	9.1	8.8	9.625	9.5976	0.560523	0.789617
	YBR097W	9.4	9.4	7.534	7.6617	-1.89879	-1.71238
	YBR098W	7.2	7	6.849	6.9664	-0.301867	-0.062996
	YBR103W	8.3	8.2	7.321	7.6515	-0.966198	-0.528171
	YBR104W	7.7	7.6	7.882	7.7677	0.153943	0.165072
	YBR106W	11.6	11.6	12.358	12.5266	0.796927	0.963358
	YBR108W	8.8	8.7	10.053	9.8893	1.24737	1.21383
	YBR110W	8.7	9.1	8.488	8.7704	-0.200983	-0.288748
	YBR111W-A	6.1	5.8	7.105	7.2992	1.04875	1.46592
	YBR114W	8.1	8	7.336	7.0776	-0.801617	-0.901992
	YBR118W	18.1	17.7	18.893	18.398	0.767525	0.72012
	YBR119W	7.1	7.2	7.773	7.7156	0.704801	0.546324
	YBR131W	7.4	7.5	6.455	6.6603	-0.986609	-0.809417
	YBR135W	7.9	7.4	9.465	9.3227	1.57208	1.92278
	YBR136W	9.9	9.9	7.51	7.555	-2.43828	-2.31755
	YBR137W	8	7.7	8.95	8.8681	0.951887	1.15926
	YBR139W	10.5	10.7	10.824	11.3041	0.363019	0.596676
	YBR142W	9.1	8.7	9.097	8.8668	-0.025798	0.118036
	YBR145W	7.9	9.4	8.227	10.0049	0.375167	0.596158
	YBR146W	8.9	9.1	9.093	9.2312	0.207558	0.086233
	YBR147W	5.9	6.4	5.658	6.5488	-0.273867	0.107473
	YBR148W	5.6	5.9	5.784	5.7584	0.187026	-0.137291
	YBR149W	10.7	11.3	11.633	12.1381	0.91383	0.873341
	YBR151W	9.4	9.5	9.672	9.7387	0.226637	0.190393
	YBR152W	5.5	5.5	6.098	6.0509	0.619585	0.583106
	YBR153W	6.8	6.8	6.054	6.4123	-0.750867	-0.426972
	YBR155W	7.8	7.6	8.783	8.518	0.950661	0.961611
	YBR158W	10.6	10.5	9.064	9.054	-1.54158	-1.42193
	YBR159W	10.3	10.5	10.521	10.972	0.263435	0.502409
	YBR160W	8.5	8.3	9.529	9.3645	1.06417	1.06197
	YBR161W	8.1	8.3	7.929	7.846	-0.177249	-0.407274
	YBR162W-A	7.7	7.4	9.162	8.6587	1.44924	1.30781
	YBR163W	8.2	8.6	6.294	6.7754	-1.87409	-1.79738
	YBR165W	7.2	7.3	7.693	7.9011	0.521023	0.632974
	YBR168W	7.4	7.7	6.074	6.5923	-1.35234	-1.12006
	YBR171W	8.3	8.3	9.395	9.369	1.13472	1.09934
	YBR175W	7.9	7.8	7.186	7.0846	-0.718904	-0.686384
	YBR176W	7.5	7.2	7.749	7.4759	0.285126	0.261382
	YBR183W	8.1	8.5	7.931	8.3834	-0.144263	-0.142224
	YBR184W	6.2	5.8	5.725	5.3733	-0.486762	-0.414409
	YBR186W	3.7	4	2.565	2.8729	-1.15452	-1.16087
	YBR187W	9.9	9.5	9.867	9.6382	0.008972	0.156607
	YBR189W	13.4	12.7	14.806	14.2192	1.4181	1.54174
	YBR192W	8	8.2	7.99	8.263	0.017593	0.059476
	YBR194W	5.3	5.4	6.125	5.8747	0.854574	0.441711
	YBR199W	10.2	10.3	9.975	10.4656	-0.189971	0.159214
	YBR200W	8.9	9	8.568	8.9603	-0.289679	-0.051317
	YBR201W	6.7	7.3	6.724	7.0646	0.042525	-0.226138
	YBR202W	9.8	9.8	9.683	9.8714	-0.139325	0.069026
	YBR203W	8.4	8.6	7.306	7.399	-1.14338	-1.1655
	YBR205W	10.3	10.2	10.112	10.1151	-0.212875	-0.110132
	YBR207W	8.9	9.3	8.567	8.965	-0.30776	-0.357574
	YBR210W	6.5	6.7	7.011	7.1484	0.486177	0.415005
	YBR212W	9.1	9.6	10.318	10.4538	1.25204	0.856864
	YBR213W	6	5.8	7.121	6.5752	1.13862	0.801537
	YBR214W	9.3	9.8	10.451	10.9326	1.1545	1.1642
	YBR215W	7.9	7.7	8.736	8.5965	0.818867	0.857031
	YBR217W	6.3	6.1	5.483	5.1769	-0.838262	-0.882141
	YBR225W	8.3	8.8	8.025	8.2999	-0.316932	-0.494046
	YBR228W	6.3	6.5	5.612	5.714	-0.702166	-0.772371
	YBR230W-A	6.2	6.1	7.64	7.2495	1.46323	1.11071
	YBR233W	7.4	7.8	8.384	8.445	0.934991	0.636559
	YBR233W-A	5.7	5.9	6.878	6.5997	1.19359	0.715614
	YBR235W	9.7	10.1	8.107	8.7329	-1.61014	-1.41361
	YBR237W	8.3	8.5	6.801	7.4464	-1.54761	-1.08947
	YBR242W	7.7	7.6	8.389	8.1182	0.667029	0.475396
	YBR244W	8.7	8.4	9.971	9.6499	1.3094	1.24566
	YBR246W	8.5	8.4	7.779	7.7901	-0.693097	-0.570993
	YBR250W	5.4	4	3.001	3.1654	-2.41025	-0.844855
	YBR251W	7.8	8.1	8.854	9.1696	1.06249	1.04824
	YBR252W	8.7	8.3	9.896	9.5002	1.23713	1.16453
	YBR253W	6.6	6.7	7.076	6.932	0.521089	0.195918
	YBR255W	7.9	8.1	6.667	6.9157	-1.2175	-1.17255
	YBR257W	6.3	6.1	7.114	6.8776	0.779841	0.748744
	YBR259W	7.7	7.7	5.563	5.9783	-2.16361	-1.74377
	YBR263W	11.7	11.1	12.091	11.5834	0.412092	0.481129
	YBR265W	8.6	8.8	8.829	8.9873	0.245634	0.200188
	YBR267W	8	7.8	9.054	8.8368	1.08555	1.07607
	YBR268W	7.8	7.8	8.191	8.0391	0.411933	0.214512
	YBR271W	7.4	7.1	7.37	7.0602	-0.045863	-0.074657
	YBR274W	8.1	8	7.421	6.8863	-0.694434	-1.1309
	YBR278W	6.8	6.9	7.232	7.0412	0.422339	0.184909
	YBR279W	8.9	8.9	9.178	9.351	0.274629	0.478541
	YBR282W	6.9	6.7	8.556	8.7872	1.69152	2.06257
	YBR284W	6.5	7.3	5.126	6.3469	-1.38873	-0.907192
	YBR285W	3.4	4.9	4.825	6.5868	1.41267	1.72479
	YBR286W	13	13.3	13.4	13.9479	0.402212	0.646541
	YBR287W	9.6	9.9	9.558	10.0279	-0.030754	0.117081
	YBR289W	9	8.7	9.431	9.2532	0.446226	0.523169
	YBR290W	7.6	7.8	8.211	8.3896	0.598823	0.628156
	YBR293W	7.2	7.6	4.994	5.4896	-2.19905	-2.14223
	YBR295W	8.5	8.7	5.435	6.1304	-3.10473	-2.60406
	YBR297W	6	6.5	5.551	6.1863	-0.446794	-0.355046
	YBR299W	5	5.1	4.884	4.4069	-0.121419	-0.674683
	YCL064C	10.1	7	10.591	6.4937	0.527999	-0.512299
	YCL061C	9	8.9	8.742	8.8417	-0.21106	-0.035793
	YCL059C	9.2	8.7	9.756	9.3994	0.579942	0.677682
	YCL057C-A	9	8.7	10.532	10.1219	1.49019	1.41336
	YCL056C	5.4	5.8	4.301	5.1266	-1.08265	-0.701391
	YCL052C	8.6	8.5	7.863	8.0423	-0.7207	-0.500994
	YCL050C	10.4	10.5	12.196	12.3713	1.78833	1.83824
	YCL049C	7.8	9.3	7.847	9.563	0.002152	0.294331
	YCL047C	7.5	7.2	7.878	7.4385	0.330019	0.268427
	YCL045C	11.2	11.1	11.383	11.4609	0.178783	0.370173
	YCL044C	7.7	7.3	8.689	8.3221	0.965907	0.983203
	YCL043C	13.4	13.5	14.099	14.2926	0.682421	0.790928
	YCL041C	9.3	9.4	10.688	10.7101	1.40216	1.33253
	YCL038C	8.3	9.1	7.829	8.5785	-0.440622	-0.533137
	YCL037C	11.3	10.5	12.69	11.8921	1.42535	1.41505
	YCL035C	8.5	8.6	11.149	11.1837	2.64894	2.55369
	YCL033C	8.2	7.9	9.027	8.5082	0.828152	0.602466
	YCL031C	8.6	8.6	8.898	9.0296	0.320918	0.4516
	YCL030C	12.4	13	12.805	13.5063	0.376797	0.495662
	YCL029C	7.5	7.4	8.168	7.9166	0.713725	0.483364
	YCL026C-B	6.3	6.3	8.558	8.4374	2.30251	2.15403
	YCL025C	9.6	11.2	9.677	11.3843	0.057986	0.229728
	YCL017C	10.2	9.9	10.667	10.3483	0.4604	0.399303
	YCL016C	7.1	6.6	7.29	6.6121	0.144577	0.012939
	YCL012C	6.3	6.8	6.822	7.1629	0.51722	0.412363
	YCL011C	10.5	10.2	10.449	9.9531	-0.048391	-0.203794
	YCL010C	7.9	7.7	7.863	7.8564	-0.039573	0.193682
	YCL009C	11.7	11	12.196	11.2954	0.457377	0.323254
	YCL008C	7.9	7.7	8.637	8.5341	0.751213	0.842683
	YCL002C	6.9	7.3	5.657	5.9374	-1.27486	-1.3361
	YCR002C	9.5	9.4	9.938	10.0821	0.402675	0.638152
	YCR004C	10.3	10.5	11.424	11.464	1.16759	0.991747
	YCR005C	11.4	11.9	11.64	12.3723	0.249332	0.46568
	YCR007C	5.7	5.3	4.541	4.6728	-1.13324	-0.634182
	YCR009C	9.7	9.8	10.724	11.0914	1.0201	1.2807
	YCR011C	11	11.2	9.986	10.3804	-0.975033	-0.84018
	YCR014C	6.9	7.4	-5.845	1.5699	-12.7886	-5.79957
	YCR015C	7	7.2	6.447	6.4478	-0.572892	-0.740727
	YCR017C	10.9	11.3	10.231	10.6256	-0.700781	-0.625039
	YCR020C	5.8	7.2	5.003	7.89	-0.784231	0.739735
	YCR020C-A	6.5	6.4	7.394	7.2014	0.911623	0.838542
	YCR021C	7.6	6.6	7.91	6.4533	0.327418	-0.120137
	YCR023C	9	9	7.504	7.7695	-1.46245	-1.23055
	YCR024C	7.1	7.5	6.797	7.1503	-0.270237	-0.374875
	YCR024C-B	10.3	10.6	0.919	1.9708	-9.39009	-8.64098
	YCR024C-A	10.3	10.5	11.799	11.726	1.47442	1.26692
	YCR026C	9.3	9.5	8.398	8.5976	-0.889707	-0.873772
	YCR027C	6.6	6.8	6.872	6.6835	0.289271	-0.085951
	YCR028C	8.1	8.4	7.443	7.9345	-0.672115	-0.502111
	YCR028C-A	9.1	9.3	11.275	11.4951	2.21421	2.21993
	YCR030C	10.1	10	10.68	10.9421	0.573152	0.931573
	YCR031C	13.7	12.9	14.761	14.1095	1.04639	1.18944
	YCR035C	7.9	8	8.361	8.295	0.485371	0.322845
	YCR037C	9.7	9.7	9.004	9.0715	-0.712721	-0.625126
	YCR038C	6.6	6.8	5.638	5.7999	-0.942153	-1.00594
	YCR042C	10.3	10.1	9.008	8.8452	-1.29409	-1.3011
	YCR043C	8.4	7.7	8.91	8.0516	0.54671	0.359345
	YCR044C	8.6	8.9	8.037	8.2551	-0.550149	-0.673214
	YCR046C	8.2	8.2	9.291	9.2557	1.05981	1.02368
	YCR047C	7.5	7.1	8.142	7.6203	0.623677	0.547332
	YCR054C	7.6	7.5	7.741	7.822	0.182872	0.318455
	YCR057C	10.1	9.8	9.449	9.1951	-0.680478	-0.592436
	YCR059C	8.9	8.5	8.416	8.1988	-0.439008	-0.342634
	YCR067C	10.3	10.1	9.946	9.5019	-0.351649	-0.548393
	YCR071C	6.6	6.6	8.083	8.1358	1.51039	1.51074
	YCR072C	8.5	8.2	9.033	8.6646	0.544753	0.499383
	YCR073C	8	8.3	5.716	6.1951	-2.27678	-2.0635
	YCR075C	7.9	7.5	7.532	7.2484	-0.32344	-0.293117
	YCR076C	7.6	7.4	8.556	8.0436	0.917076	0.598796
	YCR077C	10.5	10.7	11.301	11.5664	0.833958	0.865367
	YCR084C	11.3	10.9	11.507	11.3312	0.226214	0.443222
	YCR087C-A	7.2	6.8	8.554	7.9734	1.32737	1.22165
	YCR090C	8.7	8.2	8.339	8.0089	-0.320475	-0.219985
	YCR092C	9	8.7	8.079	7.881	-0.881207	-0.799053
	YCR095C	7.3	7.4	6.623	6.7959	-0.712404	-0.598524
	YCR098C	4.7	3.7	1.253	1.5404	-3.47801	-2.17394
	YCR102C	5.2	6	3.666	4.6229	-1.54211	-1.38161
	YCL063W	7.8	7.6	8.022	8.2734	0.237918	0.697292
	YCL058W-A	4.9	4.5	6.558	6.1843	1.67996	1.66132
	YCL057W	11.2	11.3	11.058	11.3585	-0.112677	0.04934
	YCL055W	7.4	7.7	8.298	8.8099	0.899833	1.08827
	YCL054W	9.6	9.4	9.887	9.7601	0.333035	0.330916
	YCL051W	8.1	8.4	8.316	8.0682	0.181802	-0.285564
	YCL048W	3.1	4.6	2.239	3.5554	-0.901022	-1.07674
	YCL040W	12.9	13.3	13.621	13.8882	0.693818	0.629427
	YCL039W	8.8	8.8	8.393	8.8268	-0.423098	0.001795
	YCL036W	7.3	6.8	6.416	5.2692	-0.91617	-1.51487
	YCL034W	9.1	8.9	9.742	9.5466	0.679473	0.641831
	YCL032W	7	7.3	7.377	7.6175	0.331843	0.31538
	YCL028W	10.5	10.2	12.127	11.7232	1.64189	1.50277
	YCL027W	7.1	7.4	7.636	8.2011	0.552297	0.812842
	YCL024W	8.9	8.9	7.98	8.0796	-0.870508	-0.774381
	YCL021W-A	6.8	7.5	2.563	2.5781	-4.23236	-4.92517
	YCL014W	10.5	10.2	9.422	9.0918	-1.06854	-1.15052
	YCL005W-A	7.5	7.6	10.189	10.0728	2.69192	2.4862
	YCL005W	7.3	7.3	6.769	6.6067	-0.529073	-0.722052
	YCL004W	7.3	7.5	5.962	6.6007	-1.32812	-0.851094
	YCL001W	8.4	8.7	9.714	10.0193	1.29061	1.33743
	YCR003W	6.9	7.2	8.16	8.7793	1.27497	1.60691
	YCR008W	9.8	9.4	8.902	8.6136	-0.890519	-0.795863
	YCR012W	16.8	17.1	17.779	18.0172	0.951775	0.920337
	YCR016W	7.6	7.6	8.63	8.5268	1.02441	0.921507
	YCR019W	7.1	6.9	6.453	6.1155	-0.619604	-0.750063
	YCR020W-B	5.3	5.3	6.526	6.9109	1.22457	1.63075
	YCR032W	9.8	9.9	6.913	7.4628	-2.91594	-2.47931
	YCR033W	9.9	10	8.993	8.951	-0.95656	-1.012
	YCR034W	10.7	10.5	11.41	11.3237	0.668875	0.847177
	YCR036W	8.8	8.7	9.015	9.0697	0.21221	0.323328
	YCR045W-A	5	4.8	-5.845	-4.7747	-10.8017	-9.61292
	YCR048W	9.4	9.2	9.11	8.5683	-0.252457	-0.622583
	YCR051W	8.5	7.6	9.586	8.5358	1.11505	0.910513
	YCR052W	8.9	8.7	9.356	9.0929	0.417002	0.375833
	YCR053W	12.1	11.7	13.267	12.9795	1.19279	1.23917
	YCR061W	9.5	10	10.24	10.7064	0.720657	0.732486
	YCR063W	6.4	6.4	6.866	6.6542	0.465908	0.29892
	YCR065W	9.7	9.7	10.06	10.039	0.408055	0.323214
	YCR066W	6.7	6.5	6.866	6.6991	0.129681	0.19073
	YCR068W	8.4	8.4	7.254	7.515	-1.19172	-0.847215
	YCR069W	9.3	9.7	10.014	10.3368	0.69543	0.658129
	YCR073W-A	8.7	8.5	9.641	9.1182	0.986148	0.634358
	YCR075W-A	5.5	5.7	8	7.8903	2.48703	2.19964
	YCR079W	7.8	8.1	5.823	6.5999	-1.96974	-1.51844
	YCR081W	9.3	9.1	7.563	7.7206	-1.69687	-1.33327
	YCR082W	8.3	8.2	8.802	8.4818	0.551429	0.320127
	YCR083W	7.8	8.2	8.277	8.6878	0.49251	0.521881
	YCR086W	6.1	6	7.93	7.6916	1.8691	1.64945
	YCR088W	11.5	11.5	13.552	13.489	2.01935	1.99063
	YCR089W	8.6	8.9	6.428	8.2731	-2.17097	-0.655409
	YCR091W	7.5	7.9	7.285	7.5644	-0.180744	-0.374956
	YCR093W	12.2	12.1	11.113	11.2868	-1.06395	-0.802414
	YCR094W	8.6	8.5	8.404	8.4067	-0.235428	-0.136573
	YCR097W	7	7.7	8.032	8.5219	1.00849	0.805967
	YCR106W	7.8	8.2	5.514	5.7975	-2.30854	-2.38613
	YCR107W	7.3	7.6	-0.495	-4.7746	-7.7632	-12.3884
	YDL243C	6.2	6.5	1.239	1.5509	-4.98526	-4.98973
	YDL239C	7.7	8.5	-2.081	-4.7746	-9.79715	-13.3013
	YDL238C	7.8	8.1	5.982	6.5323	-1.7823	-1.54801
	YDL235C	8.3	8	9.137	8.9264	0.840996	0.909094
	YDL234C	8.7	8.8	8.448	8.9986	-0.247613	0.237529
	YDL231C	9	9.3	4.144	4.6753	-4.88755	-4.63522
	YDL227C	9.8	10	9.758	9.873	-0.008644	-0.12278
	YDL226C	10.1	9.7	11.101	10.7274	1.03685	1.01823
	YDL224C	9.5	9.6	9.489	9.5009	-0.022558	-0.092608
	YDL222C	6.5	6.6	6.273	6.8932	-0.255142	0.276103
	YDL220C	8.2	7.9	6.719	6.7319	-1.4816	-1.13503
	YDL217C	7.2	7.4	8.431	8.1559	1.24068	0.770709
	YDL216C	6.8	6.8	6.324	6.1583	-0.516593	-0.626123
	YDL215C	9.5	10.9	8.443	10.531	-1.07724	-0.344772
	YDL214C	5.4	4.6	3.371	4.023	-1.99805	-0.613062
	YDL213C	8.2	7.6	9.502	8.741	1.33478	1.16574
	YDL211C	6	6.3	5.728	6.317	-0.27982	0.005983
	YDL209C	6.8	6.9	6.842	6.9239	0.058228	0.072703
	YDL205C	9.2	9.4	8.98	9.0861	-0.257193	-0.351946
	YDL203C	8.4	8.3	8.269	7.9077	-0.111115	-0.413863
	YDL200C	6.4	6.2	6.418	6.1444	0.021765	-0.057457
	YDL199C	7.1	7.4	6.665	6.9715	-0.483395	-0.413056
	YDL198C	8.8	9.1	9.79	9.909	0.961761	0.795091
	YDL197C	7.7	7.9	5.626	5.9362	-2.08833	-1.92314
	YDL190C	10.2	10.4	9.992	10.2973	-0.257052	-0.115345
	YDL188C	10	10.2	10.016	10.0172	-0.030727	-0.198443
	YDL184C	8.5	8.3	11.95	11.9556	3.44097	3.63708
	YDL183C	5.8	5.7	5.575	6.0236	-0.190407	0.351221
	YDL177C	6	5.7	5.441	5.4928	-0.509087	-0.214435
	YDL175C	7	6.9	8.103	7.8544	1.09008	0.927398
	YDL174C	9.6	10.7	9.087	10.54	-0.471226	-0.172448
	YDL171C	13.5	14.3	12.22	12.9316	-1.28981	-1.36766
	YDL169C	5.3	5.9	4.915	5.7436	-0.376023	-0.202501
	YDL167C	9.3	9	8.427	8.1969	-0.886998	-0.77533
	YDL166C	8.2	7.8	8.771	8.3753	0.618767	0.592282
	YDL164C	9.2	9.1	9.073	9.2543	-0.07803	0.122722
	YDL160C-A	6.4	5.8	7.315	6.9958	0.951075	1.19055
	YDL160C	11.2	11.1	12.452	12.3111	1.28937	1.22441
	YDL157C	8.2	7.9	9.329	8.6359	1.07964	0.742186
	YDL153C	9	8.6	9.469	9.3033	0.4385	0.66726
	YDL148C	9.3	9.2	9.847	9.5978	0.511174	0.38555
	YDL145C	12.6	12.8	11.943	12.197	-0.67081	-0.576713
	YDL144C	8.8	8.3	8.259	7.8078	-0.503514	-0.449338
	YDL142C	6.8	6.7	7.328	7.1636	0.500898	0.50695
	YDL140C	13.2	13.3	12.284	12.5549	-0.885345	-0.730675
	YDL139C	5.2	5.1	6.175	5.9821	0.937344	0.888942
	YDL135C	8.7	8.4	9.938	9.5442	1.26733	1.11513
	YDL134C	10.1	10.3	10.109	10.3523	0.001419	0.004457
	YDL133C-A	8.8	8.5	11.939	11.9698	3.09849	3.47004
	YDL126C	13.6	13.9	14.067	14.4172	0.432105	0.561243
	YDL125C	10	9.6	11.23	10.4097	1.25043	0.787574
	YDL121C	8	7.8	8.503	7.9744	0.469936	0.195922
	YDL119C	6.7	6.8	7.285	7.2528	0.624813	0.410863
	YDL115C	7.5	7.4	7.801	7.834	0.305122	0.482544
	YDL113C	8.6	8.7	8.332	8.5372	-0.290878	-0.211341
	YDL111C	8.2	7.8	8.618	8.3337	0.414577	0.501873
	YDL110C	7.9	9	9.499	10.6073	1.55292	1.60195
	YDL109C	7	7	4.008	4.0524	-3.04181	-2.90382
	YDL106C	7.7	7.6	8.236	8.194	0.514142	0.5611
	YDL104C	5.6	6.1	5.366	5.8828	-0.234168	-0.263097
	YDL103C	9.4	9.5	10.799	10.8415	1.37068	1.37889
	YDL101C	8.2	8.4	8.372	8.5005	0.180035	0.142618
	YDL100C	11.2	10.9	11.872	11.5962	0.693244	0.725141
	YDL098C	6.3	5.9	6.895	6.5735	0.581498	0.659572
	YDL097C	10.7	10.6	11.4	11.3492	0.71803	0.701217
	YDL091C	7.6	7.9	7.485	7.8204	-0.123343	-0.098573
	YDL090C	7.8	8	7.329	7.217	-0.46745	-0.774203
	YDL088C	8.9	8.7	9.126	9.1178	0.205882	0.381728
	YDL087C	6.4	6.7	7.072	6.9396	0.648771	0.278348
	YDL086C-A	4.1	3.7	1.377	2.1729	-2.68115	-1.48841
	YDL085C-A	6.5	5.8	7.876	6.6623	1.40068	0.856882
	YDL083C	12.7	12.1	14.09	13.4873	1.38101	1.35648
	YDL081C	12.7	12	13.803	13.1045	1.09284	1.0756
	YDL080C	8.4	8.8	6.487	7.2856	-1.87417	-1.55264
	YDL079C	5.3	5.2	2.955	2.714	-2.3154	-2.43911
	YDL078C	10.1	10.3	10.881	11.0721	0.794044	0.75287
	YDL077C	9.2	8.8	7.658	7.6435	-1.49578	-1.15775
	YDL076C	7.9	8.2	8.185	8.2976	0.246074	0.119069
	YDL074C	9.4	9.4	9.294	9.1207	-0.104069	-0.242324
	YDL072C	9.7	10	10.574	10.9949	0.833868	1.01951
	YDL069C	6	6.3	5.594	5.5857	-0.419081	-0.753409
	YDL067C	7.2	7	9.197	8.5341	1.99934	1.54099
	YDL065C	8.1	7.9	9.02	8.9687	0.943921	1.03152
	YDL063C	8.7	8.4	8.268	8.0914	-0.409808	-0.276839
	YDL061C	10.2	9.9	12.814	12.6398	2.66198	2.69873
	YDL059C	5.8	5.7	5.355	5.2987	-0.396058	-0.3561
	YDL055C	13.7	13.6	14.665	14.6491	0.940231	1.01494
	YDL054C	8.3	8.4	8.409	8.9216	0.147303	0.49442
	YDL053C	8.5	8.7	9.732	9.6785	1.26798	0.953572
	YDL052C	9.7	9.7	10.026	9.9238	0.326721	0.245365
	YDL049C	5.7	6.7	5.432	6.3653	-0.297532	-0.294245
	YDL048C	6.9	7.5	8.265	8.6744	1.32371	1.12617
	YDL045C	7.5	8	7.236	7.7552	-0.233606	-0.2841
	YDL044C	7.1	7.2	7.024	7.2343	-0.04187	0.079367
	YDL043C	7	6.8	7.987	7.9289	1.01156	1.1461
	YDL042C	8.2	7.9	8.14	8.085	-0.031362	0.224466
	YDL040C	11.4	11.2	11.206	11.0753	-0.163036	-0.116093
	YDL039C	4.7	5.9	5.422	-1.0186	0.734007	-6.90977
	YDL036C	7.5	7.1	7.589	7.1137	0.116736	0.005643
	YDL035C	9.5	9.7	8.265	8.5653	-1.22955	-1.1487
	YDL033C	6.9	6.8	5.882	6.0466	-1.03641	-0.792265
	YDL028C	8.6	8.5	8.085	8.0189	-0.524144	-0.462941
	YDL027C	8.1	8.7	7.539	8.0674	-0.595735	-0.67139
	YDL025C	8.8	9.1	8.952	9.7209	0.143152	0.575609
	YDL024C	5.3	5.7	3.271	4.1992	-2.066	-1.46764
	YDL020C	9.2	9	9.52	9.3482	0.326009	0.346312
	YDL019C	10.7	10.7	10.139	10.4383	-0.574738	-0.288287
	YDL018C	7.8	7.5	7.884	7.7734	0.083069	0.316924
	YDL015C	10.4	10.4	11.341	11.2829	0.972213	0.887525
	YDL012C	7.4	7.1	9.836	9.3998	2.4494	2.29076
	YDL005C	8.3	8.1	8.366	8.6437	0.089521	0.51728
	YDL002C	7.3	7.3	7.976	8.181	0.682054	0.85753
	YDR001C	11.1	11.1	11.028	11.0363	-0.097493	-0.100168
	YDR005C	8.2	8.4	8.013	8.5673	-0.211241	0.181617
	YDR006C	9.6	9.5	9.076	9.3773	-0.555647	-0.102419
	YDR016C	7.3	7	7.466	7.2108	0.195459	0.192615
	YDR017C	9.7	9.6	9.128	9.0691	-0.547177	-0.539168
	YDR018C	5	4.9	5.027	5.0172	0.057833	0.094709
	YDR019C	10.8	11.7	11.176	12.1246	0.406477	0.395354
	YDR020C	6.2	6.3	6.252	6.3548	0.088416	0.103265
	YDR022C	6.9	6.7	6.742	6.8342	-0.152235	0.182643
	YDR026C	7.9	8	7.067	7.27	-0.854431	-0.684812
	YDR027C	9.4	9.4	8.093	8.3026	-1.26511	-1.12404
	YDR028C	10.9	11.1	10.786	10.8118	-0.143471	-0.314778
	YDR030C	6.4	6.7	5.27	5.1236	-1.1721	-1.56591
	YDR032C	10.6	11	12.245	12.6954	1.65318	1.65067
	YDR034C	9	8.9	8.359	7.9766	-0.654765	-0.950392
	YDR036C	9	9	9.134	9.2681	0.151876	0.278852
	YDR038C	11.7	11.6	10.414	10.3732	-1.28184	-1.27215
	YDR042C	4.4	4.8	4.335	3.0435	-0.087252	-1.7783
	YDR045C	7.2	7.3	8.292	8.0602	1.06297	0.775498
	YDR046C	10.4	10.7	10.049	10.4407	-0.33649	-0.259283
	YDR050C	15	15.3	16.327	16.6933	1.28372	1.43784
	YDR051C	8.5	8.2	8.495	8.5058	0.042688	0.285752
	YDR052C	8.9	8.7	8.496	8.3442	-0.373273	-0.403662
	YDR054C	8.8	8.7	9.556	9.7079	0.793285	1.0074
	YDR056C	8.2	8.5	8.87	9.0984	0.704903	0.60956
	YDR058C	6.6	7	6.34	7.1124	-0.253159	0.094407
	YDR059C	6.3	7.1	8.007	8.7581	1.662	1.67541
	YDR066C	5.4	4.7	5.416	5.0938	0.046607	0.39095
	YDR067C	7	7.3	6.809	7.0392	-0.231571	-0.257599
	YDR069C	8.8	8.9	8.279	8.29	-0.566619	-0.623414
	YDR070C	4.7	6	6.17	8.0147	1.49878	2.06422
	YDR071C	9.7	9.8	10.602	10.9085	0.907391	1.06449
	YDR072C	9.1	10.1	8.828	10.1203	-0.249287	0.003527
	YDR078C	5.6	5.7	3.898	4.5058	-1.66011	-1.22817
	YDR079C-A	6.3	6.3	6.901	6.8647	0.629927	0.579817
	YDR081C	8.9	9.1	8.308	8.8347	-0.614372	-0.275266
	YDR084C	8.1	7.7	8.905	9.0153	0.854353	1.28758
	YDR085C	8.5	8.6	7.485	7.4411	-0.988232	-1.16674
	YDR086C	9.2	9.1	11.135	11.2253	1.91188	2.16863
	YDR087C	8.1	7.6	8.888	8.4888	0.756249	0.919365
	YDR088C	6.8	7.1	7.409	7.6584	0.581941	0.57389
	YDR090C	7	7.5	7.154	7.6755	0.115845	0.145052
	YDR091C	11	10.7	11.366	11.1175	0.385861	0.415179
	YDR097C	10.1	10	9.579	9.5737	-0.507563	-0.417178
	YDR098C	9.7	9.6	11.176	10.956	1.45859	1.38051
	YDR101C	9.7	9.2	9.869	9.7032	0.189816	0.530305
	YDR104C	8.1	8.1	6.285	6.7571	-1.84258	-1.37859
	YDR105C	9.1	9.3	8.632	8.875	-0.424902	-0.463079
	YDR107C	9.1	9	8.563	8.6932	-0.568912	-0.302612
	YDR109C	8	8	7.18	7.0072	-0.812087	-0.9996
	YDR111C	8.7	9.1	8.667	9.2795	-0.057477	0.15754
	YDR113C	7.3	7.2	8.666	8.6199	1.38264	1.46843
	YDR116C	8.1	8.4	8.886	9.1214	0.778703	0.674754
	YDR117C	8.7	8.8	9.313	9.3969	0.636739	0.644452
	YDR120C	9.7	9.2	9.514	9.3257	-0.14441	0.165816
	YDR123C	6.5	6	7.057	6.6085	0.513717	0.565179
	YDR125C	6.4	6.7	5.256	5.8135	-1.09951	-0.904836
	YDR129C	11.7	11.4	12.655	12.2356	0.927514	0.846018
	YDR130C	7.4	7.5	7.794	7.8807	0.384933	0.346447
	YDR131C	7.1	7.3	6.094	6.4178	-1.05164	-0.8347
	YDR132C	6.5	6.8	6.058	6.7059	-0.392492	-0.073175
	YDR133C	10.3	10.3	4.737	5.151	-5.60534	-5.16505
	YDR135C	11.7	11.9	10.609	11.0668	-1.08862	-0.861469
	YDR139C	6.7	7.1	8.046	8.18	1.38429	1.04568
	YDR141C	10.9	10.8	9.657	9.7982	-1.22356	-0.9906
	YDR142C	6.9	7.3	6.429	6.5973	-0.495603	-0.67179
	YDR143C	9	8.9	9.185	9.2921	0.234619	0.38543
	YDR144C	9.8	9.3	8.844	8.5461	-0.918308	-0.718658
	YDR146C	9.8	9.8	10.285	10.3818	0.480963	0.606928
	YDR148C	10.4	10.7	11.673	11.8787	1.27768	1.15342
	YDR151C	8.1	7.9	9.032	8.7039	0.964477	0.788752
	YDR153C	8.5	8.4	9.817	9.6852	1.2754	1.26072
	YDR162C	6.7	6.5	7.734	7.5632	1.03231	1.02112
	YDR164C	8.8	9	8.053	8.2686	-0.73143	-0.692815
	YDR166C	9.2	9.2	8.927	8.9708	-0.305493	-0.260295
	YDR169C	8.4	8.4	8.825	9.1585	0.463909	0.71897
	YDR170C	12.7	12.6	11.993	12.0429	-0.731404	-0.57439
	YDR173C	7.4	7.1	7.074	7.0198	-0.343343	-0.048907
	YDR175C	7.9	8.4	9.12	9.4762	1.23694	1.1245
	YDR179C	5.5	5.2	5.998	5.4853	0.491508	0.300866
	YDR181C	7.5	7.3	6.786	7.0094	-0.677005	-0.271995
	YDR185C	5	6.5	6.267	7.5217	1.28354	1.0608
	YDR186C	9.8	9.7	9.287	9.2381	-0.550515	-0.465579
	YDR190C	10.4	10.2	10.733	10.5294	0.298883	0.330081
	YDR192C	7.9	7.3	9.289	8.6718	1.41734	1.38349
	YDR194C	10.4	10.8	9.691	10.3828	-0.699908	-0.399845
	YDR196C	7.8	8.2	7.916	7.6391	0.104813	-0.593156
	YDR198C	7.1	7.1	6.548	6.5887	-0.600494	-0.525278
	YDR200C	8.5	8.5	7.982	8.133	-0.486356	-0.352938
	YDR202C	8	7.9	7.576	7.684	-0.416247	-0.234555
	YDR207C	8.3	8.2	9.196	8.6701	0.862515	0.504299
	YDR217C	9.2	9	8.658	8.4765	-0.536316	-0.507949
	YDR219C	7.9	8.2	8.234	8.3333	0.307886	0.107714
	YDR224C	11	11.4	12.962	13.4874	1.93039	2.11857
	YDR228C	8	8	8.648	8.7603	0.658593	0.726507
	YDR231C	8	7.8	8.251	7.874	0.292219	0.049774
	YDR233C	11.3	11.4	12.587	12.7038	1.30064	1.35019
	YDR236C	7.4	7.6	7.608	7.5976	0.20566	-0.007043
	YDR238C	12	11.9	11.928	11.9488	-0.032676	0.070754
	YDR239C	8.2	7.9	8.499	8.2989	0.275792	0.365924
	YDR240C	7.5	7.5	7.337	7.3963	-0.205641	-0.101873
	YDR243C	7.6	7.3	7.352	7.4633	-0.286009	0.138149
	YDR248C	7.5	7.9	7.962	7.9271	0.454431	-0.005654
	YDR249C	6.3	6.4	5.23	5.4884	-1.03622	-0.886586
	YDR255C	7.3	7.5	6.529	6.9118	-0.80241	-0.567077
	YDR256C	3.5	4.2	0.719	1.3668	-2.82952	-2.86941
	YDR257C	8.4	8.1	7.93	7.6787	-0.485178	-0.41792
	YDR258C	11.2	10.5	11.684	11.0281	0.529353	0.535537
	YDR259C	5.4	5	5.638	5.6335	0.199249	0.658789
	YDR260C	6.7	6.3	7.597	7.646	0.880277	1.38336
	YDR261C	9.7	9.4	9.614	9.2919	-0.074156	-0.062534
	YDR263C	6.8	6.7	4.123	4.2085	-2.64458	-2.45808
	YDR264C	10.8	10.6	10.007	9.9355	-0.799108	-0.668141
	YDR266C	9.6	9.1	10.1	9.7864	0.526732	0.645714
	YDR267C	7.4	7.7	7.275	7.4773	-0.134833	-0.240258
	YDR276C	9.1	9.7	11.826	12.0934	2.74124	2.4015
	YDR277C	7.3	7.2	7.586	7.4431	0.298285	0.277488
	YDR282C	6.6	6.6	5.959	5.9416	-0.632393	-0.630904
	YDR283C	10.5	10.7	8.682	8.8023	-1.78781	-1.88271
	YDR284C	8.7	9.5	9.25	9.9196	0.54381	0.394296
	YDR286C	6.2	6.1	6.563	5.985	0.3233	-0.110114
	YDR289C	7.7	7.7	8.366	8.3315	0.669018	0.626626
	YDR292C	9.6	9.4	9.522	9.5306	-0.109231	0.174989
	YDR293C	11.8	12	11.427	11.4049	-0.410717	-0.589252
	YDR294C	10.2	10.1	10.003	10.0617	-0.197109	0.004959
	YDR295C	8.2	8.2	8.105	8.1829	-0.125922	-0.051875
	YDR298C	10	9.8	10.957	10.8211	0.987098	1.01991
	YDR300C	9.3	9	9.234	9.054	-0.019461	0.059207
	YDR303C	9.7	9.6	9.423	9.5672	-0.254543	-0.03873
	YDR304C	10.3	10.3	11.528	11.6546	1.2223	1.36153
	YDR305C	6.8	7	7.524	7.526	0.773286	0.500783
	YDR306C	7.9	8.2	7.15	7.5475	-0.763782	-0.627859
	YDR308C	6.2	6.2	7.755	7.9295	1.55738	1.7569
	YDR309C	9.2	9.1	11.079	10.9504	1.87884	1.81152
	YDR310C	10.1	9.7	9.173	8.952	-0.931762	-0.755577
	YDR313C	7.3	7.5	6.801	7.4267	-0.488326	-0.104652
	YDR314C	7.7	7.6	4.689	4.8582	-3.02348	-2.72992
	YDR315C	6.8	7	5.574	5.3694	-1.20792	-1.59127
	YDR319C	6.6	7.2	6.448	7.2627	-0.111143	0.111048
	YDR320C	8.3	8.1	9.449	8.992	1.10775	0.916808
	YDR320C-A	6.5	6.5	7.357	6.9941	0.906926	0.456521
	YDR322C-A	7.4	7.5	8.665	8.8132	1.25444	1.29804
	YDR323C	6.6	7	6.485	6.4254	-0.15447	-0.55365
	YDR324C	9.6	9.2	9.49	9.2849	-0.105747	0.064806
	YDR326C	10.6	10.5	9.896	10.0955	-0.696563	-0.405445
	YDR328C	9.5	9.3	10.888	10.5389	1.39025	1.22327
	YDR329C	8.4	8.3	7.603	7.9895	-0.846971	-0.324317
	YDR333C	9.4	9.4	8.965	9.2201	-0.442383	-0.15206
	YDR338C	7.9	8.1	7.497	7.8031	-0.380926	-0.317462
	YDR339C	7.8	7.7	8.79	8.6881	1.00467	1.02943
	YDR341C	12	11.4	12.619	12.0773	0.621885	0.652154
	YDR342C	11.9	11.8	12.577	12.6523	0.707529	0.837584
	YDR343C	11.8	11.8	12.55	12.6381	0.755014	0.870719
	YDR345C	12.6	13.5	13.029	13.9517	0.421177	0.488931
	YDR346C	10.6	10.6	10.351	10.4663	-0.244029	-0.10427
	YDR348C	8.6	8.6	9.979	9.8895	1.39247	1.30053
	YDR349C	9.4	9.6	8.494	8.8827	-0.879875	-0.726892
	YDR350C	8.1	8.3	6.523	7.2449	-1.53644	-1.06317
	YDR357C	7.6	7.4	7.198	6.8414	-0.38178	-0.522665
	YDR359C	9.2	9.2	7.918	8.1038	-1.30948	-1.08769
	YDR361C	8.9	8.4	9.218	9.0781	0.36391	0.666052
	YDR362C	8.2	8.2	7.438	7.5425	-0.720566	-0.611852
	YDR364C	7.8	7.9	7.012	6.7905	-0.76629	-1.06965
	YDR365C	9.8	9.9	9.771	9.5093	-0.019235	-0.377298
	YDR366C	7.7	7.3	3.382	3.662	-4.30455	-3.67473
	YDR369C	7.7	7.6	7.16	7.0431	-0.541185	-0.515416
	YDR370C	7.5	7.6	6.649	6.7851	-0.864617	-0.789354
	YDR372C	9.7	10	9.571	9.8505	-0.123293	-0.144163
	YDR375C	8.2	8.5	7.667	8.085	-0.510707	-0.368298
	YDR378C	8.7	8.6	9.062	9.0063	0.343931	0.37658
	YDR379C-A	5	5	6.804	6.4789	1.81342	1.42919
	YDR381C-A	5.6	6	6.288	6.4241	0.709239	0.440476
	YDR383C	6	6.5	6.402	6.5843	0.364357	0.121686
	YDR384C	8.6	8.2	9.557	9.1143	0.926366	0.948978
	YDR387C	7.9	8.1	6.428	6.5722	-1.47482	-1.54975
	YDR390C	9.1	9.1	8.7	8.876	-0.389627	-0.253157
	YDR391C	7.5	8.5	7.791	9.1846	0.339592	0.685725
	YDR397C	8.3	8.3	8.434	8.3094	0.108483	0.031552
	YDR404C	8.1	7.9	8.535	8.5421	0.460174	0.646041
	YDR407C	10	9.9	8.353	8.6975	-1.63214	-1.21341
	YDR408C	9.5	9.7	9.98	10.4135	0.466953	0.755311
	YDR410C	8.1	8.3	7.951	8.4662	-0.154406	0.127795
	YDR411C	8.7	9	9.018	9.3292	0.364793	0.334234
	YDR414C	7.5	7.9	7.232	7.1058	-0.252796	-0.838344
	YDR415C	8.1	8.2	8.031	8.3105	-0.092043	0.078194
	YDR422C	9.4	9.2	9.219	8.7178	-0.187638	-0.473121
	YDR423C	8.2	8.1	8.159	8.1894	-0.044802	0.06278
	YDR424C	7.2	7.2	8.606	8.3482	1.40137	1.17077
	YDR428C	7.9	6.9	7.783	7.1692	-0.135929	0.276556
	YDR429C	10	9.8	11.49	11.0391	1.44315	1.19549
	YDR430C	10	10.2	9.339	9.741	-0.704387	-0.48578
	YDR435C	7.5	7.5	7.173	7.4202	-0.283616	-0.048675
	YDR441C	7.3	6.9	7.187	7.0516	-0.104063	0.132255
	YDR443C	9.6	9.3	7.704	7.6751	-1.86365	-1.63214
	YDR445C	22.5	21.7	10.5	14.8277	-11.9972	-6.91488
	YDR447C	12.8	12.2	13.967	13.2531	1.12468	1.08274
	YDR449C	8.3	8.1	8.281	8.1222	-0.023761	0.022035
	YDR451C	8.6	8.4	10.023	9.8884	1.37965	1.49925
	YDR453C	6.6	7.6	7.756	9.215	1.18743	1.61151
	YDR454C	10.8	10.2	11.923	11.3656	1.08407	1.16887
	YDR458C	8.8	9.1	8.308	8.7797	-0.466473	-0.345438
	YDR459C	7.5	7.7	5.254	5.4061	-2.23964	-2.31941
	YDR461C-A	6.7	6	8.552	7.9532	1.88516	1.94429
	YDR465C	8.4	8.1	8.52	8.1069	0.167244	0.05615
	YDR468C	7.4	7.2	8.526	8.0729	1.08284	0.905924
	YDR470C	8.2	8.4	8.276	8.7969	0.038187	0.442734
	YDR473C	7.1	7.1	7.377	7.4178	0.282365	0.284288
	YDR475C	9.1	9.6	7.865	8.4728	-1.28064	-1.17438
	YDR476C	8	8.2	8.777	9.1593	0.800071	0.945363
	YDR479C	8.2	8.5	7.56	8.0313	-0.599797	-0.486724
	YDR481C	9.9	10.1	9.625	9.7842	-0.283239	-0.280487
	YDR482C	6.2	5.8	6.873	6.4575	0.661199	0.661573
	YDR485C	7.9	8.1	8.115	8.4165	0.176789	0.327327
	YDR486C	7.7	7.7	9.195	9.1523	1.53909	1.49394
	YDR487C	9.7	9.7	10.487	10.4353	0.791762	0.776168
	YDR488C	7.8	8.2	6.879	6.8786	-0.870862	-1.36159
	YDR490C	9.1	8.9	8.695	8.3968	-0.387276	-0.5187
	YDR495C	8.3	8.3	7.592	7.6688	-0.757446	-0.658244
	YDR496C	9.7	9.7	10.062	10.1525	0.391598	0.473055
	YDR497C	13	12.9	12.672	12.7828	-0.294176	-0.110663
	YDR498C	7.5	7.7	7.82	7.6751	0.321169	-0.036779
	YDR500C	11.7	11	13.441	12.6258	1.71149	1.61844
	YDR502C	11.8	11.4	12.775	12.3309	0.998911	0.975696
	YDR503C	7.7	7.6	7.428	7.4203	-0.260875	-0.207824
	YDR504C	6.2	6.7	1.734	2.1694	-4.42993	-4.53327
	YDR505C	10.1	10.4	10.081	10.2733	-0.041491	-0.089421
	YDR506C	7.7	7.6	7.056	7.2303	-0.689732	-0.39461
	YDR507C	10.2	10.2	10.287	10.4446	0.100988	0.266557
	YDR508C	11.8	11.5	11.708	11.4979	-0.102484	0.009198
	YDR512C	8	7.7	8.915	8.684	0.950901	0.937398
	YDR514C	7.5	7.5	7.602	7.6922	0.117315	0.223164
	YDR516C	10.3	10.5	10.869	11.0646	0.606902	0.607867
	YDR520C	7.7	7.8	6.92	6.9267	-0.785499	-0.851744
	YDR523C	4.3	5.5	2.001	0.5235	-2.32985	-4.95173
	YDR524C	8.4	8.7	7.606	8.4026	-0.778804	-0.310053
	YDR524C-B	12.4	12.4	14.973	14.6549	2.58343	2.26912
	YDR529C	8.7	8.1	10.673	10.3507	1.9627	2.22583
	YDR530C	7.2	8.1	7.241	8.8336	0.077393	0.776947
	YDR532C	6.7	6.5	6.245	6.4985	-0.429832	-0.051095
	YDR533C	8.8	10	9.97	11.2604	1.18353	1.21165
	YDR534C	6.2	6.3	2.62	3.2111	-3.53643	-3.10529
	YDR535C	4.5	4.4	0.227	-1.0487	-4.27391	-5.46238
	YDR540C	4.8	4.8	5.451	5.0206	0.603715	0.233496
	YDR541C	7.2	7.6	5.929	6.124	-1.27361	-1.45103
	YDL248W	9.6	10.2	10.594	11.2069	1.02739	1.03162
	YDL244W	5.6	6.2	5.694	6.2709	0.10083	0.111874
	YDL241W	4.5	4.3	6.111	5.5461	1.57469	1.25426
	YDL240W	9.2	9.7	8.03	8.391	-1.13923	-1.30337
	YDL237W	9.6	9.6	9.447	9.6432	-0.137139	0.01244
	YDL236W	9.5	9.4	10.153	10.3738	0.699156	1.01671
	YDL233W	7.5	7	7.821	7.684	0.33279	0.652533
	YDL232W	6.1	6.4	8.163	8.1652	2.01936	1.77668
	YDL230W	7.7	7.6	7.657	7.5141	-0.011855	-0.095757
	YDL229W	15.8	15.2	15.993	15.4214	0.167786	0.21692
	YDL225W	9.2	9.2	9.776	9.83	0.608632	0.625883
	YDL219W	8.1	7.7	8.354	7.5731	0.236286	-0.081894
	YDL218W	3.8	4.3	2.006	2.3652	-1.78936	-1.89703
	YDL212W	9.8	9.9	10.335	10.89	0.568282	1.01881
	YDL210W	5.1	5	3.959	4.1767	-1.09327	-0.798551
	YDL208W	9.7	9.4	11.127	11.0553	1.40388	1.61296
	YDL207W	8	8.1	8.097	8.1783	0.102979	0.10998
	YDL206W	8	8.5	5.764	6.4006	-2.22006	-2.06414
	YDL204W	7	8.4	7.234	9.2053	0.263389	0.789189
	YDL202W	7.5	7.8	8.199	8.5859	0.684984	0.811966
	YDL201W	8.6	8.1	9.277	8.9643	0.713914	0.905382
	YDL195W	12.4	12.3	12.704	12.8054	0.299523	0.549561
	YDL194W	7.6	7.5	5.694	5.793	-1.88889	-1.72774
	YDL193W	8.9	9.1	9.58	9.8404	0.642249	0.764265
	YDL192W	12.2	12.2	12.498	12.6164	0.301838	0.433768
	YDL191W	13.1	12.4	14.234	13.6243	1.10185	1.18285
	YDL189W	8.4	8.6	8.664	8.8106	0.219416	0.249458
	YDL185W	14.4	14.6	14.765	14.8576	0.347574	0.307499
	YDL182W	10.9	10.7	11.54	11.3368	0.628235	0.615085
	YDL181W	7.1	6.4	8.877	8.1849	1.72754	1.74101
	YDL180W	8.3	8.3	7.49	7.3726	-0.850277	-0.89938
	YDL179W	7.7	7.4	7.887	8.1404	0.197493	0.754704
	YDL178W	9.5	10.2	9.383	10.1589	-0.151299	-0.06931
	YDL176W	8	8.1	6.602	6.5615	-1.4198	-1.53503
	YDL173W	9	8.9	9.837	9.7675	0.857446	0.831739
	YDL170W	7.9	7.6	7.221	6.809	-0.674035	-0.840321
	YDL168W	9.7	9.2	10.749	10.3129	1.04871	1.09816
	YDL165W	7.4	7.5	9.147	8.9827	1.71914	1.44194
	YDL161W	8.4	8.3	9.714	9.7263	1.32448	1.41471
	YDL159W	7.6	7.4	7.628	7.7913	0.048637	0.396684
	YDL156W	7.5	7.4	7.175	7.081	-0.369991	-0.361215
	YDL155W	8.8	8.6	8.065	7.9823	-0.707799	-0.630456
	YDL154W	7.1	7.4	2.676	4.7152	-4.4077	-2.73226
	YDL150W	8.1	7.9	8.903	8.4805	0.755378	0.580202
	YDL149W	8.3	8.6	7.476	8.045	-0.810754	-0.600738
	YDL147W	10.3	10.5	11.237	11.2509	0.920409	0.730987
	YDL146W	8.3	8.7	6.98	7.3944	-1.2835	-1.31079
	YDL143W	11.2	11	11.446	11.242	0.244939	0.278417
	YDL141W	9.7	9.3	9.082	9.237	-0.651778	-0.092087
	YDL138W	8.4	8.5	5.872	6.4701	-2.50848	-2.05489
	YDL137W	11	11.2	11.402	11.7826	0.4045	0.584326
	YDL136W	13.1	12.4	14.204	13.6085	1.14821	1.23591
	YDL133W	8.1	8.2	7.231	7.7371	-0.832071	-0.441266
	YDL132W	10.2	10.3	9.766	10.0356	-0.481964	-0.218249
	YDL131W	11.1	10.9	11.881	11.7578	0.799558	0.858185
	YDL130W-A	7.2	7.9	9.017	9.5404	1.80728	1.63494
	YDL130W	11.8	11	13.75	12.8472	1.94419	1.836
	YDL129W	5.2	4.7	5.312	5.358	0.108716	0.634379
	YDL128W	9.7	10.3	10.407	11.0797	0.732354	0.758973
	YDL127W	7	7.1	7.819	7.861	0.787126	0.726957
	YDL124W	11.2	11.5	11.816	12.3889	0.648238	0.85203
	YDL123W	6.6	6.9	7.458	7.8003	0.907141	0.922662
	YDL122W	9.9	9.9	9.331	9.4353	-0.601763	-0.492842
	YDL120W	8.4	8.5	8.78	8.831	0.380675	0.365837
	YDL117W	9.3	9.5	8.657	8.7244	-0.687307	-0.736099
	YDL116W	9.7	9.5	8.917	8.8642	-0.824845	-0.657711
	YDL112W	10.7	10.4	9.667	9.515	-1.07536	-0.874145
	YDL108W	7.3	7.2	7.56	7.5428	0.221985	0.375324
	YDL107W	6.5	6.8	6.495	7.094	0.005329	0.315617
	YDL105W	6.2	6.2	6.194	6.5348	-0.034203	0.319832
	YDL102W	9.6	9.7	9.331	9.5491	-0.270331	-0.147121
	YDL099W	8.5	8.1	9.471	9.0443	0.964265	0.909494
	YDL095W	11.9	11.7	11.93	11.6693	-0.003873	0.002983
	YDL093W	9.3	9.2	8.851	9.2604	-0.407051	0.023638
	YDL092W	7.8	7.6	9.137	9.0244	1.3826	1.47274
	YDL089W	8.1	8.5	7.617	8.0804	-0.484628	-0.395212
	YDL086W	9.7	9.7	10.351	10.5064	0.653628	0.81226
	YDL085W	4.6	5.5	3.747	4.8666	-0.87188	-0.59616
	YDL084W	12.7	12.5	13.589	13.3173	0.881634	0.856405
	YDL082W	12.5	11.9	14.307	13.634	1.76814	1.71211
	YDL075W	12.3	11.5	14.044	13.2787	1.7654	1.76928
	YDL073W	9.3	9.2	7.208	7.5889	-2.04634	-1.60321
	YDL070W	10.1	10.6	9.895	10.6305	-0.177612	0.020355
	YDL066W	12.3	12	12.463	12.1775	0.192569	0.159495
	YDL064W	8.4	7.9	9.95	9.4346	1.5996	1.49097
	YDL060W	9.6	9.4	9.326	9.0845	-0.318646	-0.334536
	YDL058W	10.9	10.4	9.686	9.2764	-1.1793	-1.13647
	YDL057W	6.5	6.6	6.908	7.0426	0.367961	0.442327
	YDL056W	8.6	8.7	8.641	8.6506	0.039098	-0.024073
	YDL051W	9.9	9.4	10.918	10.1324	0.970859	0.768537
	YDL046W	9.2	9.8	10.458	11.1144	1.23828	1.35736
	YDL045W-A	7.2	7.3	8.323	8.4518	1.09645	1.17301
	YDL031W	10.1	9.9	10.138	10.0267	0.055225	0.14425
	YDL030W	7.1	7.2	7.06	7.0738	-0.051894	-0.106136
	YDL029W	10.7	10.8	10.959	11.1359	0.224541	0.318375
	YDL022W	11.9	11.8	13.4	13.525	1.52804	1.77139
	YDL021W	8.1	8.1	8.488	8.8536	0.371102	0.753043
	YDL017W	6.9	6.9	6.988	6.9245	0.08088	0.002878
	YDL014W	11.4	10.9	12.784	12.2787	1.40096	1.36133
	YDL013W	8	8.1	7.562	7.474	-0.44208	-0.578771
	YDL010W	7.2	7.4	8.257	8.6952	1.01881	1.26799
	YDL008W	6.8	6.5	7.048	6.9506	0.268181	0.407982
	YDL007W	10.6	10.8	11.246	11.4676	0.614856	0.627051
	YDL006W	7.8	7.5	7.35	7.2668	-0.425357	-0.228306
	YDL004W	9.4	9.1	11.273	10.8189	1.88738	1.68053
	YDL003W	9.1	9	9.319	9.2675	0.242918	0.283443
	YDL001W	7.7	7.6	7.713	7.6929	-0.024213	0.046191
	YDR002W	11.3	10.9	12.481	11.9509	1.14222	1.07552
	YDR003W-A	4.7	4.4	-5.845	-1.0463	-10.553	-5.4858
	YDR004W	7.8	7.6	5.812	5.7911	-2.01935	-1.84965
	YDR007W	8.2	8	8.47	8.6211	0.271748	0.620862
	YDR009W	5.9	6	5.278	4.9255	-0.660836	-1.08962
	YDR011W	11.3	11.7	10.272	10.6053	-1.06451	-1.1317
	YDR012W	14.6	13.9	16.045	15.2896	1.45872	1.37337
	YDR013W	7.1	7	6.978	6.7629	-0.136743	-0.195064
	YDR014W	7	7.1	6.467	6.5262	-0.556743	-0.529065
	YDR021W	6.5	6.4	6.956	6.9181	0.475699	0.5141
	YDR023W	12.4	12	13.217	12.8295	0.779779	0.866794
	YDR024W	4.7	2.8	2.562	0.5467	-2.18026	-2.26128
	YDR025W	12.7	12.1	14.599	13.885	1.87524	1.78844
	YDR031W	6.8	6.9	7.445	7.9422	0.63819	1.05507
	YDR033W	13.6	13.8	14.503	14.6415	0.916533	0.843609
	YDR035W	10.1	10.4	11.171	11.5945	1.0701	1.15245
	YDR037W	12.9	12.6	13.612	13.3923	0.753643	0.831549
	YDR041W	7.9	8.4	8.492	8.8989	0.602036	0.528939
	YDR044W	9.1	9.2	9.99	10.0929	0.902387	0.911932
	YDR047W	9.4	9.7	9.416	9.9556	0.009416	0.255113
	YDR049W	8.4	8.2	8.348	8.3104	-0.063007	0.135347
	YDR055W	10.7	10.7	11.752	11.9999	1.08806	1.26329
	YDR057W	7.9	8	7.639	7.727	-0.297788	-0.226917
	YDR060W	10.7	10.4	10.651	10.5119	-0.05091	0.12328
	YDR061W	8.7	8.8	8.212	8.3958	-0.45191	-0.417707
	YDR062W	10.7	10.8	10.628	10.8856	-0.081214	0.049921
	YDR063W	7.7	7.7	9.205	9.1093	1.54377	1.3838
	YDR064W	13.7	13	15.052	14.387	1.30267	1.33829
	YDR065W	6.6	6.6	5.35	5.0448	-1.27404	-1.54331
	YDR068W	7.9	7.9	8.338	8.3237	0.395712	0.467694
	YDR073W	7.5	7.5	7.559	7.0883	0.030334	-0.400978
	YDR074W	11.9	12	11.931	12.2053	-0.004273	0.182711
	YDR075W	7.1	7.1	6.888	7.2396	-0.210984	0.17472
	YDR076W	6.3	6.4	4.931	4.9406	-1.33176	-1.43371
	YDR077W	13.5	13.8	17.013	17.4721	3.5355	3.69613
	YDR079W	6	6.3	7.577	7.9261	1.54158	1.65722
	YDR080W	8.7	8.5	8.201	7.969	-0.542721	-0.562957
	YDR082W	7.4	7.4	3.006	2.5624	-4.43659	-4.84174
	YDR083W	7.8	7.7	8.371	8.3718	0.563438	0.648958
	YDR089W	10.1	10	9.619	9.8419	-0.489588	-0.138673
	YDR092W	8	7.9	10.152	10.2772	2.17472	2.33241
	YDR093W	11.1	11	9.503	9.6597	-1.56455	-1.32717
	YDR096W	9.4	9.4	9.432	9.5679	0.078677	0.203061
	YDR099W	11.3	11.7	13.057	13.4458	1.76778	1.76826
	YDR100W	8.1	7.9	9.721	9.8232	1.64322	1.87478
	YDR103W	9.1	9	8.979	8.8684	-0.121515	-0.11166
	YDR106W	4.5	3.9	4.342	4.5731	-0.170157	0.703523
	YDR108W	8.2	8.1	7.174	7.4915	-0.993026	-0.603227
	YDR110W	8.1	8	7.597	7.526	-0.455896	-0.431289
	YDR115W	7.2	7.3	8.568	8.6407	1.3975	1.33902
	YDR118W	7.8	7.7	6.963	7.1359	-0.852791	-0.610406
	YDR119W	10.8	10.7	10.41	10.1561	-0.434292	-0.555069
	YDR119W-A	4.6	4.4	6.338	5.7076	1.76512	1.26884
	YDR121W	7.1	7.2	8.221	8.0849	1.09892	0.858019
	YDR122W	10.3	10.5	9.47	9.6902	-0.801734	-0.763374
	YDR124W	5.3	4.5	3.528	1.9833	-1.80764	-2.49196
	YDR126W	5.6	5.7	5.666	6.0478	0.040739	0.320542
	YDR127W	12.9	13.1	12.566	12.926	-0.351298	-0.17588
	YDR128W	9.8	10	7.439	7.4368	-2.38268	-2.60525
	YDR137W	8.4	8.3	7.368	7.626	-1.03338	-0.721494
	YDR138W	8.5	8.7	7.976	8.3921	-0.554663	-0.315522
	YDR140W	7	6.6	7.235	6.665	0.257912	0.09247
	YDR145W	8.9	8.8	9.768	9.6532	0.899643	0.863176
	YDR147W	8.5	8.5	8.017	7.9874	-0.529322	-0.486818
	YDR150W	12.8	12.8	11.821	11.7904	-0.987173	-0.98191
	YDR152W	8.4	7.9	8.809	8.4362	0.451584	0.567685
	YDR158W	12.2	12	12.808	12.6776	0.629006	0.722789
	YDR159W	9.3	9.5	7.877	8.2149	-1.40483	-1.28344
	YDR160W	7.9	8.4	5.784	6.5336	-2.16177	-1.86212
	YDR161W	8.8	8.5	9.121	8.5383	0.336152	0.031398
	YDR163W	5.8	5.8	7.321	7.2572	1.49519	1.41293
	YDR165W	9.3	8.6	9.448	8.8561	0.152694	0.252079
	YDR167W	7.7	7.7	8.899	8.7489	1.16253	1.07436
	YDR168W	10.2	10	11.127	10.7719	0.950395	0.752673
	YDR171W	10	9.7	10.886	10.94	0.916864	1.23304
	YDR172W	11.5	11	12.844	12.3884	1.33123	1.36591
	YDR174W	10.3	10.4	11.214	11.4866	0.916289	1.11845
	YDR176W	8.9	9	8.606	8.4987	-0.300251	-0.453372
	YDR177W	9.2	9.3	10.63	10.6067	1.4605	1.33758
	YDR178W	8.5	8.6	9.854	9.7377	1.38837	1.17856
	YDR179W-A	7.1	7	5.706	5.6271	-1.36384	-1.35366
	YDR180W	9.2	9.3	8.317	8.2645	-0.89565	-1.07874
	YDR182W	9.2	9.5	9.012	9.525	-0.200715	0.055399
	YDR183W	6.5	6.4	6.642	6.5091	0.112001	0.120293
	YDR188W	11.6	11.4	11.595	11.3939	-0.007844	-0.037289
	YDR189W	9.8	9.7	9.915	10.0332	0.152128	0.3349
	YDR191W	6.4	6.6	6.964	7.3409	0.526718	0.700934
	YDR195W	7.8	8	8.509	8.6981	0.757742	0.669795
	YDR197W	7.7	7.7	7.001	7.2234	-0.665108	-0.469066
	YDR201W	6.6	6.3	7.227	6.9643	0.593593	0.650342
	YDR204W	8.4	8.4	8.623	8.3926	0.177661	-0.053135
	YDR205W	8.7	8.7	8.306	8.269	-0.420065	-0.428665
	YDR206W	9.8	9.8	8.34	8.2752	-1.48184	-1.52929
	YDR208W	9.7	9.7	9.388	9.5707	-0.294556	-0.159742
	YDR210W	8.1	7.2	10.091	9.2273	1.95393	2.05126
	YDR211W	10.8	10.5	10.296	10.1462	-0.470327	-0.354717
	YDR212W	11.5	11.1	11.606	11.3756	0.093525	0.238479
	YDR213W	8.6	8.3	8.366	8.0993	-0.263962	-0.194782
	YDR214W	10.4	9.4	11.618	10.3559	1.2129	1.00542
	YDR216W	9.6	9.3	8.571	7.9091	-1.06089	-1.37599
	YDR221W	9.2	9.2	8.286	8.5414	-0.864539	-0.66474
	YDR222W	8.1	7.4	8.197	7.2412	0.067335	-0.150608
	YDR223W	5.2	3.1	3.445	1.2291	-1.79152	-1.84277
	YDR225W	11.6	11.7	12.796	12.8867	1.14612	1.21129
	YDR226W	12.2	12.1	13.771	13.7448	1.60329	1.63529
	YDR227W	9.3	9.2	8.72	8.6026	-0.598433	-0.583759
	YDR229W	8	7.9	8.379	8.5039	0.420825	0.571273
	YDR232W	10.6	10.8	10.716	10.6849	0.106213	-0.153472
	YDR234W	9.9	9.8	9.746	9.3448	-0.156529	-0.433956
	YDR235W	8	8.3	7.433	7.5959	-0.608894	-0.726725
	YDR237W	7.9	8	8.78	8.86	0.869145	0.863125
	YDR241W	4.2	4.5	2.32	0.9504	-1.92231	-3.5337
	YDR242W	6.8	7	3.777	3.3588	-3.02961	-3.63479
	YDR244W	8.5	8.5	8.798	8.8363	0.290468	0.349554
	YDR245W	9.5	9.5	8.824	8.7877	-0.696242	-0.714412
	YDR246W	7.2	6.9	7.819	7.6276	0.581821	0.708498
	YDR247W	7.8	7.8	7.014	7.074	-0.74347	-0.769356
	YDR251W	10.1	10.5	9.224	9.6655	-0.903632	-0.786162
	YDR252W	5.7	5.7	6.859	6.8294	1.17279	1.16573
	YDR254W	7.3	7.4	6.015	6.924	-1.26333	-0.479752
	YDR262W	7.8	8.5	8.411	9.1706	0.609313	0.683203
	YDR265W	6.9	6.8	6.1	6.5021	-0.838592	-0.278591
	YDR268W	7.8	7.8	7.687	8.0587	-0.121478	0.244838
	YDR270W	8.6	8.8	7.431	8.0068	-1.21392	-0.762762
	YDR272W	9.2	9.1	10.238	10.1908	1.02353	1.04934
	YDR273W	5.5	5.6	4.739	3.4469	-0.75227	-2.13114
	YDR275W	7.8	8.2	5.447	7.2594	-2.30345	-0.922487
	YDR279W	7.4	7.6	7.57	7.7794	0.14611	0.219582
	YDR280W	7.9	8.1	8.17	8.3325	0.267673	0.240777
	YDR285W	6.1	6.1	4.836	3.4215	-1.2282	-2.63402
	YDR287W	7.5	7.5	7.616	7.6188	0.129399	0.140869
	YDR288W	7.7	7.6	6.77	6.9222	-0.890079	-0.659923
	YDR291W	9.1	9.1	7.049	7.1384	-2.08288	-1.94963
	YDR296W	8.1	8.3	8.844	8.9584	0.78138	0.62849
	YDR297W	9.6	9.8	9.847	10.216	0.25218	0.45222
	YDR299W	8.3	7.9	9.249	8.9796	0.90632	1.09044
	YDR301W	9.8	9.8	8.542	8.6877	-1.2504	-1.14452
	YDR302W	7.2	7.3	8.472	8.7529	1.22736	1.40678
	YDR307W	9	9.1	9.059	9.1935	0.097896	0.129364
	YDR311W	8.7	8.6	8.843	8.705	0.137939	0.153412
	YDR312W	8	7.7	8.455	8.3219	0.430561	0.604153
	YDR316W	7.5	7.6	6.675	6.9333	-0.790034	-0.685681
	YDR317W	5.7	4.6	5.028	4.505	-0.719628	-0.045492
	YDR318W	6.7	6.9	5.926	6.2263	-0.736062	-0.646668
	YDR321W	10.9	10	11.637	10.5343	0.751918	0.539599
	YDR322W	8.1	8.4	8.994	9.5369	0.866043	1.10223
	YDR325W	9.2	8.9	7.719	7.6812	-1.50972	-1.19642
	YDR330W	8.4	8.7	9.186	9.4813	0.783663	0.80423
	YDR331W	8.9	8.9	8.546	8.8873	-0.32821	-0.030795
	YDR332W	7.6	7.5	4.828	5.4676	-2.78346	-1.99343
	YDR334W	10.2	10.1	7.367	7.557	-2.87308	-2.50876
	YDR335W	11	11	9.56	9.3922	-1.46252	-1.62987
	YDR336W	6.9	6.9	5.803	5.9711	-1.09572	-0.901312
	YDR337W	7.7	8.2	8.624	8.8487	0.897657	0.604576
	YDR347W	9.1	9.2	8.829	8.9348	-0.240633	-0.296601
	YDR351W	9.2	9.1	8.979	8.8068	-0.173248	-0.34266
	YDR352W	8	7.8	8.279	8.483	0.284164	0.678648
	YDR353W	11.7	11.7	12.579	12.5172	0.865152	0.833825
	YDR354W	8.9	8.6	9.321	9.0646	0.413796	0.450204
	YDR356W	8.9	9.1	8.775	9.0011	-0.107043	-0.083857
	YDR358W	8.8	9.1	9.664	9.9904	0.883374	0.926981
	YDR363W	7.5	7.8	7.021	7.138	-0.515319	-0.686802
	YDR363W-A	7.8	7.8	9.32	9.2229	1.47581	1.42837
	YDR367W	8.2	8.2	8.204	8.1397	0.040738	-0.067851
	YDR368W	10.5	10.6	11.201	11.1747	0.727678	0.621428
	YDR371W	8	8.4	7.023	7.165	-0.96726	-1.27138
	YDR374W-A	6.2	6.4	6.834	6.5264	0.604649	0.155124
	YDR376W	8.5	8.5	7.913	7.7002	-0.562955	-0.803252
	YDR377W	9.3	9.2	10.525	10.2038	1.23501	1.03607
	YDR379W	8.8	9.2	8.716	8.8653	-0.109575	-0.301796
	YDR380W	5.8	7.3	5.896	7.4011	0.079238	0.060206
	YDR381W	11	10.9	12.177	11.8648	1.21692	0.970551
	YDR382W	12.5	11.7	13.798	12.7818	1.26163	1.039
	YDR385W	16.6	16.3	16.641	16.4441	0.049578	0.158387
	YDR386W	7.4	7.6	6.626	6.6901	-0.745831	-0.873644
	YDR388W	11.2	11	11.776	11.6688	0.572771	0.668244
	YDR389W	9.3	9	8.91	8.9824	-0.384681	0.015129
	YDR392W	7.4	7.2	7.292	7.2362	-0.152169	0.030238
	YDR393W	7.6	7.6	6.653	6.7568	-0.901271	-0.857954
	YDR394W	10.2	10.3	10.956	11.1744	0.765679	0.922773
	YDR395W	11	10.6	11.018	10.8037	-0.014268	0.248771
	YDR398W	9.1	8.9	9.331	9.1344	0.25015	0.263501
	YDR399W	9.9	10.5	10.795	11.2064	0.888445	0.737893
	YDR403W	6	5.8	4.939	4.5501	-1.06291	-1.23893
	YDR405W	7.3	7.4	8.689	8.866	1.39131	1.47061
	YDR406W	10	12.1	8.699	11.4762	-1.30253	-0.658259
	YDR409W	8.5	8.3	7.817	7.6966	-0.728083	-0.584054
	YDR412W	7.4	7.4	8.257	8.0608	0.814104	0.677528
	YDR416W	8.5	8.5	7.228	7.4738	-1.24919	-1.01682
	YDR418W	13.1	12.5	14.546	13.798	1.43414	1.34174
	YDR419W	7.6	7.7	6.541	6.7728	-1.10576	-0.934871
	YDR420W	10.4	10.7	10.041	10.3738	-0.32361	-0.347023
	YDR421W	8.6	8.3	7.267	6.8219	-1.31386	-1.44718
	YDR425W	7.5	7.4	7.795	7.7699	0.279051	0.379692
	YDR427W	9.8	9.9	10.74	10.9017	0.956657	1.02648
	YDR434W	9.3	9.5	9.253	9.2536	-0.083962	-0.219447
	YDR436W	8.2	8.1	8.307	8.2844	0.110107	0.177464
	YDR438W	6.4	6.6	1.093	2.3021	-5.31151	-4.29318
	YDR439W	7.1	7	6.65	6.7493	-0.408447	-0.29297
	YDR440W	8	8	7.304	7.3502	-0.67574	-0.669588
	YDR444W	8.1	8.5	6.384	6.987	-1.72375	-1.49483
	YDR448W	8	7.9	7.945	8.0853	-0.036557	0.209757
	YDR450W	13	12.2	14.25	13.4943	1.22032	1.26206
	YDR452W	10.4	11.1	9.343	10.1135	-1.07751	-0.943241
	YDR456W	9.8	10	9.422	9.7162	-0.40028	-0.330045
	YDR457W	12.6	12.6	10.426	10.7902	-2.16439	-1.84712
	YDR460W	7.3	7.3	8.003	7.9527	0.678427	0.61711
	YDR461W	7.8	8.7	10.03	11.1072	2.22978	2.37041
	YDR462W	7.2	7.2	9.052	8.7783	1.85046	1.59407
	YDR463W	9.2	9.1	10.318	10.2666	1.16439	1.21516
	YDR464W	9.4	9.1	8.824	8.5813	-0.591219	-0.478483
	YDR466W	8.8	9.1	8.029	8.4304	-0.769194	-0.6569
	YDR469W	7	6.8	7.674	7.0825	0.658195	0.328053
	YDR471W	11.6	11.3	12.844	12.4742	1.27274	1.17811
	YDR472W	7.6	7.2	8.288	8.5242	0.699918	1.30467
	YDR477W	9.8	10.2	10.217	10.4719	0.439485	0.268826
	YDR478W	5.7	5.3	6.486	5.5412	0.756181	0.253359
	YDR483W	11.4	11.6	11.324	11.3584	-0.115195	-0.19909
	YDR484W	8.1	7.9	7.797	7.8889	-0.285282	0.024522
	YDR489W	6.7	6.5	7.453	7.2856	0.776362	0.817803
	YDR492W	8	8.4	8.473	9.3951	0.50199	1.03387
	YDR493W	6.5	6.5	7.892	7.923	1.39493	1.37607
	YDR494W	8.1	8.5	8.616	9.0507	0.475487	0.588987
	YDR499W	8	8.1	6.885	6.5435	-1.11116	-1.55168
	YDR501W	6.5	6.6	7.346	7.4408	0.854781	0.811351
	YDR510W	10.1	9.9	11.333	10.9375	1.22698	1.001
	YDR511W	7.4	7.4	8.064	7.9029	0.660235	0.5355
	YDR513W	9.6	10.2	10.876	11.4751	1.26251	1.25507
	YDR515W	7.7	7.9	8.584	8.6577	0.84082	0.780673
	YDR517W	9.5	9.1	9.681	9.0857	0.202693	-0.048545
	YDR518W	9.6	9.8	10.079	10.3538	0.462742	0.561625
	YDR519W	8.7	8.9	9.25	9.5947	0.576695	0.708266
	YDR525W-A	7	8	8.81	9.6975	1.76048	1.6796
	YDR527W	8.2	8.3	8.641	8.5728	0.442714	0.251093
	YDR528W	8	8.2	7.414	7.416	-0.610264	-0.787357
	YDR531W	8.9	9	8.543	8.3154	-0.383817	-0.644848
	YDR538W	6.8	7.2	6.29	7.1225	-0.50867	-0.057954
	YDR539W	9	9.1	8.96	9.2444	0.009101	0.117142
	YEL073C	7	7.1	7.918	7.7486	0.947527	0.678752
	YEL068C	6.4	6.3	6.757	6.5255	0.350511	0.217894
	YEL064C	7.2	7.8	6.789	7.0693	-0.449684	-0.739844
	YEL063C	9.7	10.1	10.238	10.5787	0.563513	0.452614
	YEL061C	9.3	9.2	8.045	8.0412	-1.2674	-1.20744
	YEL060C	11.3	12.2	12.036	13.0128	0.777284	0.83073
	YEL059C-A	4.8	5.7	6.875	7.2406	2.03087	1.58607
	YEL057C	4	3.3	2.437	2.2043	-1.51332	-1.08769
	YEL055C	10.7	10.1	10.059	9.7242	-0.616243	-0.359023
	YEL054C	12.5	11.9	14.081	13.5321	1.61563	1.59838
	YEL053C	8.6	9	7.392	7.9906	-1.1796	-0.984082
	YEL050C	8.9	8.9	9.022	8.8726	0.091013	-0.03057
	YEL048C	6.2	6.1	6.377	5.933	0.142451	-0.171265
	YEL047C	10.6	10.9	11.47	11.8506	0.911421	0.930179
	YEL046C	11.5	11.4	12.267	12.2356	0.770382	0.876739
	YEL039C	5.6	5.9	6.783	6.9465	1.22551	1.05298
	YEL037C	10.1	9.9	11.871	11.6296	1.78844	1.77557
	YEL036C	9.7	9.5	9.385	9.268	-0.340007	-0.271599
	YEL029C	8	7.8	7.386	7.1905	-0.577547	-0.615678
	YEL025C	9.9	9.8	6.776	6.6772	-3.07401	-3.07732
	YEL023C	7.2	7.3	0.726	0.9911	-6.51928	-6.33917
	YEL017C-A	9.4	9.6	11.485	11.5479	2.03635	1.94556
	YEL016C	8.5	8.3	6.338	6.1316	-2.11964	-2.14367
	YEL009C	11.9	12.1	8.657	8.7797	-3.27298	-3.3511
	YEL005C	6.6	6.6	6.053	6.3646	-0.522201	-0.216985
	YEL002C	10.7	10.9	11.581	11.7895	0.842381	0.92578
	YEL001C	9.8	9.8	10.464	10.5972	0.675625	0.772991
	YER003C	11.6	11.5	12.71	12.8443	1.12931	1.31708
	YER007C-A	9	8.6	10.229	9.969	1.19408	1.38983
	YER008C	10.1	10.1	9.476	9.5955	-0.579994	-0.464256
	YER010C	7.9	8	8.447	8.5621	0.596761	0.549357
	YER017C	9.9	9.9	9.04	9.1371	-0.8658	-0.793936
	YER018C	7.6	7.3	7.805	7.6777	0.192769	0.337578
	YER019C-A	9.2	9.2	10.584	10.3825	1.40207	1.20585
	YER026C	11.3	11.7	11.828	12.2975	0.492629	0.575865
	YER027C	9.4	9.1	10.757	10.608	1.36541	1.46561
	YER028C	6.3	6.7	6.461	6.6227	0.170698	-0.039756
	YER029C	7.2	6.7	7.533	7.6198	0.331503	0.913901
	YER031C	10	9.8	10.111	9.8851	0.137439	0.089188
	YER033C	8.6	8.6	7.92	8.0581	-0.714126	-0.52
	YER036C	12.1	11.9	12.11	11.8311	-0.028258	-0.030668
	YER038C	6.7	6.6	5.216	5.0493	-1.53251	-1.53876
	YER039C	5.5	6.1	-0.084	-4.7746	-5.61551	-10.8335
	YER043C	14.5	14.7	15.257	15.4944	0.748297	0.836296
	YER044C	8.2	8.7	8.987	9.6267	0.808065	0.944593
	YER044C-A	5	4.3	1.724	-1.0423	-3.29962	-5.31045
	YER045C	6.5	7.2	6.788	7.6862	0.314372	0.451405
	YER047C	8.3	8.2	8.164	8.3422	-0.133714	0.110621
	YER048C	10	9.7	11.009	10.6302	1.0312	0.936958
	YER050C	6.9	7.4	8.636	8.9356	1.7226	1.49653
	YER052C	10	9.7	10.874	10.7942	0.858631	1.07116
	YER053C	8.4	9.2	9.017	9.9244	0.577778	0.685027
	YER053C-A	5.5	4.2	7.944	5.9518	2.43083	1.73408
	YER054C	7.1	6.9	6.281	6.7589	-0.828869	-0.135064
	YER055C	11.1	11.1	11.091	11.0944	-0.049892	0.033935
	YER056C	11	10.9	11.268	10.9521	0.258322	0.040733
	YER056C-A	12.3	11.4	13.568	12.9214	1.31516	1.48488
	YER057C	9.3	9.7	11.193	11.8451	1.93449	2.1584
	YER061C	8.8	8.8	7.97	7.7291	-0.83696	-1.10242
	YER062C	10.2	10.5	11.429	11.7213	1.18697	1.24855
	YER064C	9.5	9.3	9.752	9.6044	0.223631	0.331562
	YER065C	6.5	6.9	4.108	4.592	-2.4373	-2.29853
	YER071C	6.4	6.2	7.42	7.0933	1.06427	0.912408
	YER075C	8.4	8.4	7.936	8.0527	-0.435261	-0.362033
	YER076C	6.4	6.7	5.102	5.3434	-1.3088	-1.37513
	YER077C	8.1	8	7.31	7.4831	-0.76965	-0.549578
	YER078C	8.3	8.7	7.728	8.3079	-0.589327	-0.429531
	YER082C	8.7	8.6	8.855	8.5126	0.129367	-0.071572
	YER083C	8.8	8.7	10.386	10.1688	1.54465	1.47686
	YER087C-B	8.6	8.2	9.448	9.4299	0.847416	1.21191
	YER088C	10.2	10	11.067	10.7883	0.843266	0.749348
	YER088C-A	6.3	6.8	5.033	4.5869	-1.22595	-2.20588
	YER089C	10.5	10.5	10.38	10.4135	-0.144209	-0.050443
	YER091C	14.3	14.8	14.777	15.5121	0.492397	0.754689
	YER093C	9.1	9.1	7.583	7.5562	-1.5282	-1.54452
	YER093C-A	5.4	6	6.146	6.6525	0.762704	0.646439
	YER094C	9.9	10	10.646	10.7253	0.764238	0.701319
	YER099C	8.2	7.8	8.89	8.532	0.699344	0.684348
	YER101C	7	7.6	8.085	8.3551	1.04087	0.797618
	YER105C	11.1	10.8	9.689	9.6586	-1.37949	-1.15302
	YER107C	8.8	8.8	9.106	8.9245	0.296928	0.102229
	YER109C	8.2	8.3	6.074	6.1446	-2.15981	-2.12467
	YER110C	12.9	12	13.465	12.4615	0.604177	0.495006
	YER111C	9.6	9.4	9.045	9.1598	-0.561562	-0.199452
	YER113C	9.6	9.5	7.895	7.9265	-1.71248	-1.56756
	YER114C	10	9.8	10.299	10.0057	0.312746	0.214677
	YER115C	6.6	6.7	4.182	3.7505	-2.44642	-2.94062
	YER116C	6.7	7	7.04	6.8768	0.295035	-0.172861
	YER118C	8.7	8.4	8.923	8.9277	0.26098	0.563745
	YER119C	9.1	9.2	8.868	8.8588	-0.183304	-0.302363
	YER122C	10.6	10.5	11.371	11.2317	0.800929	0.710466
	YER124C	10.7	10.4	10.622	10.3303	-0.117255	-0.089944
	YER126C	8.8	8.9	9.835	9.779	1.00343	0.925756
	YER130C	8.4	8.4	7.802	8.4301	-0.587212	0.074818
	YER132C	9.8	9.6	7.666	7.7923	-2.15473	-1.83073
	YER134C	7.7	7.7	8.477	8.2204	0.789858	0.549304
	YER137C	4.4	3.6	4.911	3.8628	0.518883	0.257405
	YER139C	6.7	7	7.299	7.6287	0.641694	0.667837
	YER142C	6.7	7.1	7.244	7.7061	0.559604	0.596359
	YER144C	8.8	8.5	7.595	7.2512	-1.18086	-1.25957
	YER145C	10.5	10.2	10.379	10.3169	-0.086413	0.105907
	YER147C	7.6	7.7	6.765	6.76	-0.882131	-0.949176
	YER149C	7.8	7.6	7.885	7.5126	0.062103	-0.053585
	YER151C	10.3	10.2	10.622	10.6136	0.331385	0.377406
	YER152C	9.8	9.6	8.686	8.4595	-1.1444	-1.09677
	YER155C	12.3	12.2	10.714	10.4581	-1.61211	-1.69281
	YER156C	9.8	9.9	10.523	10.7845	0.765156	0.891294
	YER158C	7.5	8.1	8.342	9.1074	0.891547	1.02873
	YER159C	7.7	8.4	8.748	9.0944	1.06202	0.680104
	YER161C	7.3	7.3	7.937	7.7222	0.685148	0.407569
	YER162C	7.3	7.8	7.266	7.6185	-0.082978	-0.16584
	YER163C	8.2	7.2	8.135	7.3497	-0.098567	0.132225
	YER168C	8.9	8.8	8.966	9.1218	0.041537	0.350368
	YER172C	11	10.8	9.54	9.5079	-1.41546	-1.33648
	YER174C	7.9	8	8.28	8.1582	0.397754	0.151059
	YER175C	7.1	7.2	7.927	7.7297	0.830288	0.506229
	YER180C	6.7	6.9	-5.845	0.542	-12.496	-6.33932
	YER180C-A	4.7	4.4	5.553	5.1262	0.889607	0.759781
	YER183C	7.5	7	8.025	7.4588	0.513104	0.472558
	YER184C	7.1	7.5	4.052	4.8395	-3.01698	-2.63946
	YER186C	7.7	8.1	-0.497	0.5611	-8.16022	-7.56763
	YEL072W	5.9	6	2.958	3.5576	-2.98899	-2.42024
	YEL071W	12.5	12.5	12.885	12.9867	0.41717	0.456961
	YEL070W	4.6	5.5	4.164	5.061	-0.481831	-0.458905
	YEL066W	8	7.6	8.923	8.4034	0.9359	0.798694
	YEL065W	9.4	10.2	9.349	10.0708	-0.084743	-0.142111
	YEL062W	7.9	7.9	7.049	7.1897	-0.900023	-0.736454
	YEL058W	10.8	10.7	10.502	10.4492	-0.330318	-0.204265
	YEL056W	8.6	8	8.368	8.0153	-0.223349	-0.029199
	YEL052W	8.9	8.7	8.396	8.1336	-0.525943	-0.60959
	YEL051W	11	10.9	11.201	11.2633	0.234613	0.3526
	YEL049W	3.9	4.7	2.607	1.6326	-1.24314	-3.07679
	YEL044W	7.8	7.7	8.683	8.3312	0.850184	0.607765
	YEL043W	9.9	9.7	8.782	8.7709	-1.15361	-0.923047
	YEL042W	10.7	10.3	11.008	10.4489	0.289427	0.173267
	YEL041W	6.5	6.8	5.766	5.7158	-0.770814	-1.07418
	YEL040W	11.4	11.2	11.48	11.4493	0.062824	0.240448
	YEL038W	8.7	8.4	9.148	8.8222	0.425255	0.447922
	YEL034W	13.7	13.1	14.807	14.227	1.10495	1.13403
	YEL033W	10	9.5	0.92	0.9757	-9.04879	-8.48299
	YEL032W	10.3	10.5	9.816	10.035	-0.527103	-0.438146
	YEL031W	12.6	12.6	12.003	12.2327	-0.549279	-0.401237
	YEL030W	6.3	6.7	2.831	3.9405	-3.49615	-2.76416
	YEL028W	3.8	4.2	0.231	0.5434	-3.61588	-3.6519
	YEL027W	12.4	12.3	13.435	13.4287	1.08182	1.1577
	YEL026W	10.3	9.6	11.857	11.5079	1.57439	1.91785
	YEL024W	8.8	8.8	10.073	9.941	1.22429	1.18303
	YEL022W	10.9	10.9	9.69	9.8911	-1.17941	-1.03262
	YEL021W	13.3	13.3	13.901	14.0047	0.640873	0.654976
	YEL020W-A	7.2	7	8.85	8.7518	1.60954	1.72579
	YEL018W	7.1	6.8	7.179	6.8994	0.082217	0.052958
	YEL017W	8.4	8.1	9.549	9.3268	1.16964	1.19558
	YEL015W	9.4	9	9.66	9.5342	0.233263	0.559427
	YEL013W	10.9	11.1	10.532	10.8514	-0.392259	-0.230569
	YEL012W	7.2	7.5	8.024	7.9719	0.80307	0.518484
	YEL011W	9.3	10.5	9.443	10.7516	0.1175	0.242671
	YEL007W	10.2	9.9	9.98	9.975	-0.22073	0.123959
	YEL006W	7.8	7.7	7.126	7.6617	-0.628203	-0.051006
	YEL004W	7.1	7.5	7.061	7.577	-0.055489	0.070169
	YEL003W	7.8	7.6	8.395	7.8432	0.637798	0.252665
	YER001W	10.4	10.6	10.077	10.3231	-0.319164	-0.313769
	YER002W	7.5	7.2	9.034	8.7499	1.54589	1.59011
	YER004W	9.6	9.4	10.032	10.0473	0.395986	0.617947
	YER005W	8.6	8.4	7.203	6.9518	-1.39393	-1.40913
	YER006W	10.1	9.8	10.831	10.5076	0.70018	0.678728
	YER007W	6.7	6.7	5.936	5.7549	-0.74456	-0.98021
	YER009W	11.1	10.7	12.716	12.4341	1.63347	1.77436
	YER011W	6.6	7	8.743	9.4804	2.1016	2.50014
	YER012W	9.6	9.6	10.205	10.2985	0.558357	0.686049
	YER013W	8.8	8.8	8.078	8.1614	-0.719817	-0.612857
	YER014W	8.8	8.4	8.199	8.0304	-0.555655	-0.419176
	YER015W	6.9	7.7	5.22	6.8609	-1.67978	-0.835425
	YER016W	8.6	8.4	8.5	8.3738	-0.066365	-0.006751
	YER019W	9.2	8.8	8.691	8.4589	-0.487022	-0.351865
	YER020W	9	9.1	9.233	9.2022	0.226171	0.09113
	YER021W	11.1	11.1	11.018	11.115	-0.081295	-0.014171
	YER022W	8.7	8.7	8.721	8.6731	0.065437	0.017321
	YER023W	11.5	11.3	12.045	11.9862	0.541245	0.718791
	YER024W	7.5	7.2	5.465	5.8663	-2.08425	-1.36348
	YER025W	11.5	11.3	12.512	12.2236	0.999523	0.965359
	YER030W	7.4	6.9	8.971	8.3926	1.61474	1.53645
	YER032W	8.7	8.6	9.089	9.142	0.351736	0.57464
	YER034W	6.7	6.7	8.185	7.8062	1.53229	1.11059
	YER035W	8.1	7.9	9.513	9.3987	1.40707	1.4829
	YER037W	6.3	7.2	6.21	6.8374	-0.124103	-0.356799
	YER040W	8.3	8.3	8.55	8.452	0.217948	0.198913
	YER041W	7.5	7.5	4.802	5.2564	-2.67334	-2.24052
	YER042W	7.1	6.7	8.498	8.4241	1.42873	1.67427
	YER046W	5.2	5.4	5.304	4.9416	0.152254	-0.43591
	YER048W-A	7.7	7.8	8.689	8.6588	1.00416	0.83473
	YER049W	10.5	10.3	10.329	10.1321	-0.150856	-0.130838
	YER051W	7.4	7.7	6.12	6.1579	-1.24394	-1.55448
	YER058W	4.8	5.2	5.722	6.058	0.923515	0.852872
	YER059W	7.9	7.7	8.493	8.3122	0.621576	0.645668
	YER060W	8.2	6.6	7.264	5.4683	-0.938488	-1.15182
	YER060W-A	8	7.6	8.193	7.7559	0.156224	0.186045
	YER063W	8.6	8.7	10.047	10.046	1.44251	1.32443
	YER066W	5.8	6.3	4.051	3.6883	-1.73672	-2.58826
	YER067W	7.9	8	9.192	9.2901	1.32221	1.30044
	YER068W	9.2	9.1	10.664	10.4535	1.47184	1.37
	YER069W	10.2	8.3	10.163	7.6574	-0.07959	-0.690776
	YER070W	12.5	12.6	11.888	12.273	-0.568148	-0.368999
	YER072W	9.5	9.2	10.716	10.7053	1.25316	1.4607
	YER073W	9.9	9.2	10.037	9.3028	0.089145	0.145269
	YER074W	13.1	12.4	14.573	13.8324	1.43072	1.44417
	YER074W-A	6.7	6.6	7.984	7.6448	1.31608	1.01006
	YER079W	6.8	7	8.802	9.0491	1.97856	2.02555
	YER080W	10.3	10.3	9.969	10.2387	-0.305309	-0.022597
	YER081W	8.7	12.3	8.424	13.3884	-0.319464	1.06454
	YER084W	3.3	4.2	5.003	6.1075	1.70708	1.91043
	YER086W	11.3	11.4	11.245	11.3546	-0.052302	-0.008143
	YER087W	8.2	8.4	7.581	7.8105	-0.667275	-0.55303
	YER090W	10.7	10.3	11.66	11.2522	1.00706	0.904665
	YER092W	7.4	6.7	8.327	7.643	0.96683	0.905865
	YER095W	8.9	9.1	9.296	9.3222	0.41717	0.181706
	YER096W	4.8	5.5	4.77	5.3385	-0.051651	-0.132676
	YER098W	7.8	7.8	6.435	6.7085	-1.34879	-1.04841
	YER100W	8.2	8.3	10.264	10.1169	2.10685	1.84964
	YER102W	14.6	13.9	15.401	14.8546	0.847042	0.910256
	YER103W	9.5	10.1	10.06	10.4332	0.555507	0.369271
	YER104W	5.9	5.3	6.669	6.4901	0.743154	1.17252
	YER112W	7.5	7.6	9.164	9.4038	1.6638	1.80438
	YER117W	13.4	12.8	14.277	13.4468	0.881529	0.676166
	YER120W	10.6	10.3	12.398	12.2754	1.78194	1.99304
	YER121W	4.2	4.3	4.558	4.2783	0.335365	0.005653
	YER123W	8.4	8.7	8.371	8.7978	-0.050643	0.107114
	YER125W	11.6	11.7	11.729	11.9506	0.169515	0.216642
	YER127W	7.8	7.1	8.732	8.168	0.966317	1.06059
	YER128W	5.8	5.1	7.145	6.6574	1.30111	1.5337
	YER129W	9.6	9.8	7.811	8.1178	-1.74894	-1.72028
	YER131W	11.5	11.1	13.148	12.7691	1.61556	1.70471
	YER133W	10.8	11.1	11.355	11.6297	0.565153	0.573801
	YER136W	10.6	10.8	11.014	11.2742	0.423662	0.453646
	YER138W-A	7.4	8	1.505	0.5551	-5.90901	-7.39917
	YER140W	7.5	7.8	6.168	6.6869	-1.37222	-1.06737
	YER141W	10	10.2	10.036	10.1421	0.043894	-0.052636
	YER143W	8	7.8	9.265	9.247	1.29525	1.48808
	YER146W	8.2	8	9.565	9.123	1.32323	1.11086
	YER148W	9.6	9.6	9.915	9.7363	0.321957	0.147976
	YER150W	7.4	6.5	9.32	8.682	1.92833	2.22635
	YER154W	9.4	9.1	9.288	9.4041	-0.06356	0.271592
	YER157W	9.3	9	8.64	8.5027	-0.618609	-0.503195
	YER164W	10.7	10.7	10.204	10.2395	-0.493862	-0.493734
	YER165W	13.4	13.2	14.594	14.0111	1.21166	0.848818
	YER166W	11.2	11.2	10.021	10.261	-1.16993	-0.918566
	YER167W	9	9.1	9.107	8.9991	0.068137	-0.05801
	YER169W	8.4	8.7	8.232	8.4087	-0.172349	-0.253626
	YER170W	6.5	6.6	7.82	7.9356	1.36055	1.30964
	YER171W	8.8	9.1	8.074	8.3154	-0.704345	-0.747288
	YER173W	7.7	7.6	5.916	6.037	-1.73425	-1.57641
	YER176W	9.2	9.4	8.741	8.9797	-0.48485	-0.428062
	YER177W	12.8	12.7	14.088	13.9412	1.29293	1.21091
	YER178W	12.9	12.6	13.073	12.963	0.218927	0.317608
	YER179W	4.5	4.5	4.307	4.1235	-0.150583	-0.390972
	YER182W	6.9	7.3	7.729	8.268	0.831499	1.01086
	YER187W	3.1	5.7	-1.081	-4.7746	-4.14341	-10.4869
	YER188W	5.3	6.1	4.167	5.6873	-1.12981	-0.394852
	YFL057C	5.9	6	-0.084	0.9775	-5.98809	-5.04584
	YFL054C	7.4	7.6	6.232	6.3234	-1.11852	-1.24589
	YFL050C	7.2	7.7	2.313	3.2862	-4.91194	-4.44547
	YFL048C	10.1	9.8	10.305	10.2267	0.229976	0.387601
	YFL045C	12.1	11.9	13.071	13.0307	1.01637	1.16198
	YFL044C	8	7.7	8.687	8.525	0.701148	0.802829
	YFL042C	8.3	8.4	8.665	8.8305	0.32914	0.422104
	YFL039C	14.6	14.7	15.428	15.546	0.857958	0.8118
	YFL038C	10.7	10.6	11.663	11.7211	1.00474	1.13414
	YFL034C-B	7.4	7.3	8.79	8.8774	1.35503	1.57724
	YFL034C-A	8.4	8.6	10.031	10.0317	1.61755	1.42247
	YFL033C	10.1	10.5	9.078	9.4789	-1.06311	-1.02682
	YFL029C	7.3	7.4	7.081	7.2473	-0.214412	-0.127889
	YFL028C	8.2	8.3	8.462	8.5447	0.212677	0.228465
	YFL027C	7.8	8.2	6.524	6.7603	-1.28935	-1.46759
	YFL025C	9	9	7.777	7.8888	-1.19944	-1.12258
	YFL024C	8.7	8.8	7.917	8.2699	-0.742497	-0.485626
	YFL022C	11.5	11	12.732	12.3154	1.22923	1.27521
	YFL020C	3.7	4	1.911	3.1097	-1.81547	-0.860617
	YFL018C	11.3	11.5	12.095	12.4867	0.790605	0.93836
	YFL017C	8	7.6	8.688	8.0226	0.68817	0.417494
	YFL016C	9.7	9.4	10.249	10.0232	0.502837	0.670111
	YFL013C	8.5	8.7	8.945	9.0752	0.42833	0.379324
	YFL010C	10.2	9.8	12.596	12.0337	2.39269	2.27734
	YFL003C	5.7	5	3.169	3.5557	-2.4939	-1.47138
	YFL002C	8.5	8.5	8.564	8.5055	0.070083	-0.003963
	YFR003C	7.3	7.7	8.981	9.0208	1.66386	1.28366
	YFR005C	8.2	8	7.593	7.4087	-0.612937	-0.603967
	YFR011C	7.6	7.9	8.846	8.9341	1.23621	1.00934
	YFR014C	8.6	8.8	8.728	9.0648	0.139205	0.234133
	YFR015C	9.9	10.2	9.597	9.9168	-0.329456	-0.237662
	YFR016C	10.1	9.8	10.456	10.1469	0.371155	0.325285
	YFR017C	7.1	6.9	8.42	8.1881	1.27251	1.29442
	YFR018C	9	9.3	7.931	8.1684	-1.08325	-1.11584
	YFR024C-A	10.3	10.2	10.688	10.6993	0.373305	0.462076
	YFR025C	8.6	8.6	8.394	8.5071	-0.247822	-0.050406
	YFR026C	4.2	4.2	-0.499	0.909	-4.72112	-3.31847
	YFR028C	9.2	8.8	8.987	8.7782	-0.216302	-0.021234
	YFR031C	9	9	7.266	7.3945	-1.77707	-1.61789
	YFR031C-A	14.3	13.5	15.394	14.4961	1.06087	0.957515
	YFR032C-A	12.2	11.8	13.579	12.856	1.33573	1.09978
	YFR033C	8.1	7.6	8.74	7.6362	0.607624	-0.013128
	YFR034C	8.4	8.4	9.274	9.1231	0.895418	0.759579
	YFR037C	9.9	9.6	10.688	10.4794	0.801683	0.839599
	YFR039C	8.6	8.5	8.172	8.2897	-0.476485	-0.240186
	YFR041C	7.8	7.8	8.516	9.0434	0.7496	1.19714
	YFR043C	6.4	6.1	6.689	6.4929	0.310278	0.357784
	YFR044C	11.6	11.4	12.341	12.275	0.700376	0.914092
	YFR046C	6.2	6.5	6.326	6.3978	0.098448	-0.111032
	YFR047C	9.5	10.1	9.949	10.5395	0.49037	0.47574
	YFR050C	10.1	10.1	10.708	10.8545	0.617838	0.71048
	YFR051C	11	10.9	11.248	11.378	0.292539	0.526596
	YFR053C	12.5	13	13.178	13.8927	0.641359	0.845806
	YFL055W	5.7	5.4	4.257	3.6991	-1.47656	-1.74425
	YFL052W	4.4	5	3.664	4.788	-0.711375	-0.242996
	YFL049W	8.1	8.1	8.284	8.4377	0.159128	0.351007
	YFL047W	9.4	9.5	8.068	8.5268	-1.37669	-0.980862
	YFL046W	7.2	7.5	7.544	7.6795	0.393895	0.138684
	YFL041W	9.6	9.7	9.583	10.0129	0.006931	0.278011
	YFL037W	12.1	11.9	12.19	12.1932	0.059464	0.315987
	YFL036W	10.5	10.8	9.659	10.0195	-0.82826	-0.743904
	YFL034W	9.1	9	8.41	8.2199	-0.709989	-0.80934
	YFL031W	12.3	12.2	7.451	7.8815	-4.80624	-4.28739
	YFL030W	5.8	6.2	4.617	4.8901	-1.14494	-1.2799
	YFL026W	11.7	12.4	11.639	12.3952	-0.069542	0.031703
	YFL023W	8.2	8.1	8.589	8.0411	0.342129	-0.041766
	YFL021W	8.7	8.6	9.197	9.1019	0.508946	0.459977
	YFL017W-A	5.8	5.3	8.207	7.7214	2.42562	2.46632
	YFL014W	9.7	11.3	11.51	13.0421	1.78344	1.75723
	YFL009W	9.9	9.6	9.592	9.1398	-0.265439	-0.449318
	YFL008W	9.8	9.8	9.275	9.3633	-0.563108	-0.415013
	YFL007W	11.7	11.8	10.14	10.6146	-1.54701	-1.21664
	YFL005W	9.8	10	10.785	10.8876	0.936439	0.857191
	YFL004W	11.1	11.1	10.806	10.9568	-0.256622	-0.152467
	YFL001W	7.5	7.5	7.513	7.4934	0.021029	-0.027249
	YFR001W	7.4	7.2	8.277	8.04	0.914973	0.867023
	YFR002W	10.1	10.1	9.809	9.8384	-0.29351	-0.272325
	YFR004W	9.9	10.1	10.488	10.5678	0.602985	0.49915
	YFR006W	9.9	9.9	9.939	9.8735	0.06732	-0.065598
	YFR007W	7.1	7.1	7.175	7.4288	0.039719	0.288834
	YFR008W	5.9	6.2	7.083	7.6192	1.21993	1.43106
	YFR009W	11.2	10.7	11.047	10.56	-0.121748	-0.164156
	YFR010W	10.2	10.5	10.987	11.2527	0.737098	0.737426
	YFR013W	9.1	9.2	8.735	8.9606	-0.356359	-0.274263
	YFR019W	10.8	10.5	9.421	9.1236	-1.3667	-1.32684
	YFR020W	5.4	6.3	4.11	5.7017	-1.29974	-0.594375
	YFR021W	8.3	7.9	8.284	7.831	-0.007263	-0.08204
	YFR022W	7.9	8.4	6.086	7.0777	-1.77006	-1.31044
	YFR023W	4.8	4.7	4.546	4.1078	-0.231637	-0.621842
	YFR027W	5.7	5.6	6.503	6.3362	0.818473	0.688869
	YFR029W	8	7.7	7.662	7.4166	-0.381131	-0.31614
	YFR030W	8.9	8.8	7.221	7.385	-1.64654	-1.37811
	YFR034W-A	5.1	5.3	4.983	5.1386	-0.152592	-0.148395
	YFR038W	9.4	9.1	8.372	7.9792	-0.998872	-1.07584
	YFR040W	10	10.4	8.996	9.3066	-1.02252	-1.0479
	YFR042W	7.5	7.2	7.733	7.4694	0.271018	0.290749
	YFR045W	6.6	6.8	7.379	7.677	0.786751	0.89011
	YFR048W	8	8.2	7.91	7.8629	-0.10576	-0.348174
	YFR049W	7.6	7.5	9.218	9.1491	1.66469	1.61709
	YFR052W	9.5	9.7	10.69	10.9728	1.1422	1.22457
	YFR055W	8.5	7.7	8.821	7.4125	0.349023	-0.274315
	YGL257C	9	9.1	7.163	6.8092	-1.81372	-2.26963
	YGL252C	9.6	9.8	8.816	8.9683	-0.762048	-0.809895
	YGL251C	7.4	7.5	4.733	5.0748	-2.64021	-2.39978
	YGL246C	8.1	8.1	7.83	8.0663	-0.24656	-0.01287
	YGL242C	8.2	7.9	9.578	9.352	1.33958	1.49664
	YGL237C	6.9	6.8	7.752	7.729	0.805975	0.928432
	YGL236C	8.2	8.3	6.969	7.2941	-1.28042	-1.03312
	YGL231C	8.8	8.9	10.046	10.204	1.28054	1.28551
	YGL229C	8.4	8.7	6.165	6.9133	-2.19324	-1.76711
	YGL226C-A	7.2	7.2	9.687	9.5742	2.48339	2.36016
	YGL224C	7.5	7.2	7.584	7.5549	0.094155	0.357251
	YGL223C	8.3	8.1	8.369	8.5915	0.089272	0.537724
	YGL222C	6.7	6.3	9.031	8.8443	2.31166	2.51267
	YGL221C	9.3	8.8	10.158	9.6119	0.869106	0.821657
	YGL219C	8.3	8.3	8.313	8.5611	0.011119	0.216559
	YGL213C	8.7	8.7	9.089	9.1542	0.368044	0.483004
	YGL206C	13.6	13.7	13.79	13.9762	0.207946	0.324634
	YGL204C	6.2	5.6	6.472	5.5752	0.29175	-0.040678
	YGL203C	9.7	9.8	9.459	9.5201	-0.282215	-0.242525
	YGL201C	10	9.8	9.529	9.2445	-0.459995	-0.573502
	YGL200C	10.2	10	11.105	11.0317	0.942777	1.01852
	YGL194C-A	6.4	6	6.077	5.663	-0.334816	-0.345417
	YGL194C	8	7.7	7.938	7.906	-0.040223	0.1745
	YGL193C	4.4	5.3	-0.494	-4.7746	-4.85387	-10.0471
	YGL190C	9.4	9.6	8.367	8.6504	-1.01438	-0.939369
	YGL189C	12.9	12.2	14.281	13.5582	1.36333	1.39175
	YGL187C	8.8	8.8	10.3	10.1879	1.52859	1.35507
	YGL186C	9.3	9.9	9.815	10.4197	0.504818	0.492865
	YGL185C	7.5	6.5	7.75	6.6867	0.290917	0.190071
	YGL184C	4.3	4.9	5.308	5.1978	0.968819	0.320612
	YGL179C	7	7.3	6.242	6.3492	-0.759908	-0.975233
	YGL176C	7.6	7.6	4.851	5.3254	-2.76876	-2.29797
	YGL175C	6.4	6.4	5.533	5.9872	-0.823762	-0.368312
	YGL173C	12.8	13	12.408	12.7842	-0.352279	-0.196874
	YGL167C	11.3	11.6	10.346	10.6126	-0.926097	-0.969083
	YGL164C	7	7.4	7.392	7.9699	0.365062	0.548342
	YGL163C	8.7	8.4	7.951	7.9673	-0.779659	-0.477081
	YGL161C	8.9	9.1	9.368	9.3837	0.450353	0.305775
	YGL154C	6.5	6.6	5.525	5.2162	-1.00476	-1.41494
	YGL150C	10.9	10.9	9.059	9.203	-1.83546	-1.68604
	YGL147C	13.7	12.8	14.839	13.9301	1.11702	1.13801
	YGL146C	5.8	5.6	3.268	2.754	-2.51065	-2.80172
	YGL144C	7.5	7.4	5.588	6.1516	-1.92278	-1.2303
	YGL143C	7.7	7.9	7.11	7.3038	-0.547147	-0.5671
	YGL142C	8.7	9.1	8.039	8.3673	-0.675923	-0.747269
	YGL140C	10.5	10.5	9.034	9.0617	-1.44951	-1.44346
	YGL136C	6.5	6.5	5.079	5.5596	-1.43359	-0.898534
	YGL131C	9.1	9	6.431	6.3639	-2.68863	-2.60248
	YGL129C	8.6	8.7	8.998	9.2425	0.350126	0.497181
	YGL128C	6.2	5.9	6.997	6.569	0.784653	0.690844
	YGL127C	6.3	6.2	8.08	7.7003	1.77512	1.53736
	YGL124C	8	7.9	7.343	7.3648	-0.626846	-0.520869
	YGL122C	9.4	9.2	11.587	11.3207	2.20077	2.15825
	YGL121C	5.8	7.3	6.846	8.3508	1.02737	1.0262
	YGL120C	10.6	10.1	10.879	10.4417	0.279012	0.33844
	YGL112C	9.1	9	9.13	9.2491	-0.009803	0.248555
	YGL110C	8.3	8.5	8.064	8.4377	-0.212184	-0.037112
	YGL108C	6.1	5.7	6.698	6.0514	0.579171	0.308706
	YGL107C	8.9	9.2	8.44	8.8738	-0.445164	-0.342867
	YGL104C	8	8.8	7.539	8.4086	-0.416021	-0.425355
	YGL095C	8.7	9.2	8.216	8.7335	-0.511872	-0.451545
	YGL094C	10	10.1	7.553	7.9378	-2.41439	-2.12304
	YGL091C	7.6	7.6	8.486	8.2812	0.895469	0.685796
	YGL087C	7.9	7.7	9.934	9.9152	2.02536	2.26493
	YGL084C	9.4	9.5	9.645	9.922	0.223591	0.39189
	YGL078C	9.7	9.6	10.589	10.68	0.893466	1.06876
	YGL077C	11.1	11.1	11.025	10.9072	-0.058765	-0.224552
	YGL076C	14.3	13.6	15.646	15.0438	1.31604	1.45314
	YGL075C	6.6	6.7	6.457	6.6812	-0.1443	0.009599
	YGL072C	4.6	3.6	2.56	1.8357	-2.00917	-1.81001
	YGL070C	7.6	7.6	9.028	8.7476	1.4017	1.17378
	YGL065C	8.6	8.9	8.795	9.1076	0.165433	0.236385
	YGL064C	7.2	7.1	7.549	7.6672	0.391229	0.570867
	YGL061C	6.8	6.6	7.688	7.741	0.843124	1.10566
	YGL057C	6.8	6.9	7.378	7.7587	0.569223	0.808932
	YGL056C	9	8.7	9.315	9.3669	0.364304	0.63074
	YGL054C	9.4	9.5	10.486	10.7385	1.04654	1.20741
	YGL049C	10.1	10.2	10.993	11.0432	0.868016	0.806269
	YGL048C	10.4	10.5	10.944	10.9705	0.528608	0.460351
	YGL044C	7.3	7.7	8.645	8.6596	1.31472	0.983338
	YGL040C	10.1	10.2	10.73	10.824	0.67488	0.661584
	YGL038C	9.7	10.1	9.518	10.3699	-0.217986	0.27073
	YGL037C	11	10.8	12.615	12.4909	1.61338	1.69278
	YGL035C	8.7	8.6	9.521	9.3929	0.81443	0.784528
	YGL032C	7.1	7.6	9.325	9.9843	2.23368	2.41014
	YGL031C	12.7	12	14.017	13.1942	1.31357	1.23863
	YGL028C	10.2	10.1	11.416	11.3932	1.16713	1.3164
	YGL027C	10.7	10.8	10.163	10.5828	-0.520626	-0.173587
	YGL026C	12.5	12.4	13.404	13.2987	0.860707	0.879615
	YGL025C	7.6	7.3	8.715	8.5495	1.16271	1.21318
	YGL023C	9.5	9.3	9.28	9.0036	-0.260106	-0.256185
	YGL020C	8.2	8.3	9.063	9.2153	0.831073	0.868803
	YGL018C	6.5	5.8	7.69	7.4446	1.20748	1.64987
	YGL013C	9.8	9.7	8.746	8.7161	-1.08483	-0.963999
	YGL011C	10.1	10.1	10.692	10.8071	0.545731	0.694302
	YGL009C	12.6	12	13.154	12.6506	0.518002	0.694345
	YGL008C	16.6	16.5	16.635	16.647	0.06393	0.175661
	YGL005C	7.4	7.7	7.115	7.4404	-0.267621	-0.239375
	YGL004C	7.5	7.7	6.89	7.1894	-0.579315	-0.520825
	YGL003C	7.8	8	7.705	7.9182	-0.121961	-0.114695
	YGL001C	9.9	10.3	10.113	10.6555	0.186167	0.308043
	YGR001C	9.2	8.6	9.642	9.2592	0.468208	0.678928
	YGR002C	8	8	8.434	8.2344	0.399479	0.204156
	YGR005C	8.4	8.6	9.1	9.1828	0.74113	0.582116
	YGR008C	8	9	10.208	11.1657	2.21039	2.16746
	YGR009C	9.4	9.1	9.998	10.0093	0.644516	0.880793
	YGR015C	6.4	6.3	6.371	6.1848	-0.002494	-0.079961
	YGR020C	9.5	9.7	11.008	11.291	1.49189	1.63885
	YGR024C	8.3	8.5	7.629	7.758	-0.646271	-0.726616
	YGR027C	13	12.6	13.92	13.4696	0.889495	0.908289
	YGR030C	6.1	5.6	6.86	6.9771	0.808111	1.4246
	YGR033C	8.3	8.3	8.461	8.7789	0.159674	0.443735
	YGR035C	3.7	5.7	4.694	7.3344	1.03482	1.68228
	YGR036C	6.9	6.9	7.283	7.3667	0.392834	0.420617
	YGR037C	10.1	10.2	11.909	12.0203	1.83619	1.81103
	YGR043C	6.6	6.7	7.027	7.2918	0.465555	0.589279
	YGR044C	9.2	9.3	9.315	9.691	0.122908	0.419975
	YGR045C	5.1	5.3	2.563	3.07	-2.50231	-2.22749
	YGR047C	9	9.1	8.296	8.5962	-0.733138	-0.502039
	YGR050C	5.2	4.7	4.772	4.4257	-0.410951	-0.26003
	YGR053C	4.9	6.3	4.38	5.2991	-0.560195	-0.951896
	YGR057C	6.6	6.7	5.312	5.1513	-1.32701	-1.52371
	YGR061C	13.3	14.2	12.621	13.8155	-0.682993	-0.353118
	YGR062C	6.7	7	5.92	6.2347	-0.823986	-0.754106
	YGR063C	7.9	7.6	8.682	7.7257	0.77003	0.096949
	YGR065C	8.6	8.4	7.92	7.7801	-0.705604	-0.602508
	YGR067C	5.4	5.2	4.549	4.2337	-0.883081	-0.92623
	YGR068C	8.2	7.9	7.334	7.2364	-0.910944	-0.667607
	YGR071C	8.4	8.6	7.497	7.6681	-0.94114	-0.891907
	YGR073C	4.7	4.6	-2.084	-4.7746	-6.74678	-9.37375
	YGR075C	5.8	6	6.385	6.4783	0.589158	0.449312
	YGR076C	6	6.1	8.284	8.6634	2.28821	2.52869
	YGR077C	8.5	8.7	7.505	7.5152	-1.03881	-1.15638
	YGR078C	8.1	7.8	9.663	9.1268	1.57453	1.30571
	YGR081C	7	6.9	8.241	7.7831	1.27237	0.844322
	YGR083C	10	9.7	10.313	9.8759	0.337514	0.198546
	YGR084C	8	8.2	8.875	9.2809	0.832652	1.06766
	YGR085C	13.5	12.9	14.77	14.2352	1.29804	1.37502
	YGR086C	12.5	12.3	13.332	13.2454	0.856691	0.928784
	YGR087C	4.4	5.2	6.387	5.9289	1.95915	0.699961
	YGR095C	7.2	7.3	8.433	8.2883	1.2283	0.977637
	YGR098C	10	10	7.456	7.6013	-2.5268	-2.36096
	YGR102C	7.4	6.9	7.634	7.1726	0.268465	0.311691
	YGR104C	7.2	6.8	7.806	7.607	0.655292	0.799369
	YGR106C	10.8	11	11.114	11.511	0.311874	0.52551
	YGR109C	7.2	7.2	8.097	8.1411	0.899879	0.964335
	YGR117C	8.8	8.6	8.429	8.3334	-0.346201	-0.285913
	YGR119C	9.7	9.5	10.422	10.1606	0.760226	0.637161
	YGR120C	7.1	6.6	7.218	7.0302	0.079169	0.47434
	YGR121C	6.4	6.5	5.448	5.6326	-0.913939	-0.841684
	YGR122C-A	4.7	4.2	3.349	3.5555	-1.37205	-0.640376
	YGR123C	10	9.6	10.347	10.1279	0.383659	0.535234
	YGR128C	9.5	9.2	9.555	9.3481	0.037206	0.155741
	YGR130C	10.4	10.7	11.606	11.8129	1.20679	1.12451
	YGR132C	10	10.2	10.529	10.5612	0.524857	0.403149
	YGR138C	10.3	10.3	10.861	10.8094	0.537721	0.50252
	YGR146C	7.6	6.8	8.423	8.1942	0.781582	1.39361
	YGR147C	8.2	8.1	7.906	7.805	-0.252399	-0.260489
	YGR148C	12.3	11.6	13.729	12.8737	1.39736	1.28139
	YGR150C	8.7	8.9	6.808	7.433	-1.88794	-1.49383
	YGR154C	6.1	6.5	0.498	1.9673	-5.61994	-4.52227
	YGR158C	7.6	7.5	8.757	8.5787	1.10966	1.06553
	YGR159C	11.1	11.4	12.172	12.3968	1.09083	1.00266
	YGR161C	6.8	6.3	9.116	8.5842	2.3088	2.3225
	YGR168C	6.9	7.1	5.157	5.7228	-1.78877	-1.34628
	YGR169C	7.4	7.3	6.259	6.4104	-1.11812	-0.865479
	YGR169C-A	6.2	6	7.915	7.0809	1.69131	1.12908
	YGR171C	7.8	7.6	6.762	6.8272	-0.993289	-0.763891
	YGR172C	9	8.9	10.036	9.7418	1.04339	0.830741
	YGR174C	6.7	7.2	7.452	7.7878	0.720769	0.585711
	YGR175C	12.1	12.2	12.88	13.018	0.737757	0.776963
	YGR177C	8.3	7.9	8.039	7.3806	-0.220484	-0.540222
	YGR178C	11.2	10.8	11.747	11.2962	0.589722	0.486406
	YGR179C	7.2	7.2	7.195	7.0882	0.036483	-0.111793
	YGR180C	12	12.2	12.888	13.0907	0.844334	0.925865
	YGR182C	6.9	7	-1.081	-0.0372	-7.9672	-7.02391
	YGR183C	6.7	6.3	8.356	7.9705	1.70495	1.65042
	YGR184C	11.5	11.6	9.731	9.7593	-1.79888	-1.87393
	YGR185C	11.4	10.9	12.279	12.0629	0.875479	1.20008
	YGR187C	8.6	8.1	9.407	8.9669	0.824449	0.826488
	YGR188C	7.5	7.4	5.939	5.9676	-1.60107	-1.38913
	YGR189C	11.4	11.3	12.522	12.3876	1.10457	1.05777
	YGR192C	17.6	17.8	18.822	19.2172	1.17637	1.38048
	YGR193C	9	9.2	10.522	10.6714	1.48722	1.49163
	YGR194C	8.9	8.9	8.204	8.5132	-0.662654	-0.387541
	YGR196C	8.9	8.9	9.501	9.4701	0.56075	0.55105
	YGR197C	7.6	7.8	7.309	7.5907	-0.33893	-0.207725
	YGR200C	10.1	9.6	9.537	9.0985	-0.604715	-0.457214
	YGR201C	6.5	7	5.552	5.7226	-0.912999	-1.31922
	YGR202C	8.5	9	9.251	10.0638	0.710238	1.10047
	YGR207C	9	9.2	10.326	10.429	1.30642	1.22459
	YGR209C	11	11.4	12.442	12.8471	1.45703	1.40095
	YGR210C	9.5	9.3	9.498	9.0299	0.045602	-0.235674
	YGR216C	8.7	8.6	7.518	7.6606	-1.13254	-0.954941
	YGR220C	8.5	8.5	8.536	8.4733	0.085867	-0.014993
	YGR221C	7.7	8.3	5.817	6.4817	-1.90354	-1.79947
	YGR223C	7.6	7.8	6.734	6.7536	-0.820928	-1.08445
	YGR229C	10.1	10.3	10.094	10.3859	-0.052318	0.065902
	YGR231C	10	10.3	10.374	10.6621	0.383063	0.358809
	YGR233C	8.8	9.2	7.614	8.0552	-1.23373	-1.1803
	YGR235C	8.4	8.7	9.427	9.6891	1.00693	0.954632
	YGR237C	8.6	8.8	8.741	9.0549	0.189185	0.301457
	YGR238C	8.9	8.7	7.415	7.2335	-1.45598	-1.49567
	YGR239C	5.9	5.8	6.612	6.6526	0.752048	0.832176
	YGR240C	14.2	14.2	14.422	14.459	0.232883	0.293557
	YGR241C	9.1	8.8	9.018	9.0936	-0.074209	0.260777
	YGR244C	10.3	10.7	10.719	11.2663	0.452739	0.53087
	YGR245C	9.8	9.4	9.539	9.4884	-0.285673	0.118635
	YGR246C	8.5	8.3	8.911	8.9241	0.381868	0.575605
	YGR250C	9.8	10	9.777	10.0105	0.011323	-0.010006
	YGR253C	10.2	10.2	10.363	10.4754	0.121505	0.24994
	YGR255C	9.4	9.6	8.579	9.1499	-0.822612	-0.460197
	YGR257C	8.7	8.6	6.77	6.5302	-1.89809	-2.10897
	YGR258C	8.9	8.9	7.421	7.5705	-1.46022	-1.35501
	YGR261C	10.5	10.3	9.616	9.6988	-0.843496	-0.63225
	YGR262C	8	7.9	8.301	8.351	0.324786	0.443982
	YGR263C	7	7.1	7.224	7.336	0.215084	0.211412
	YGR264C	12.2	11.8	12.081	11.8562	-0.127346	0.067156
	YGR267C	9.4	9.4	9.743	9.7377	0.326379	0.341519
	YGR268C	6.7	6.6	8.35	8.0982	1.69151	1.48559
	YGR271C-A	6.7	7	7.759	7.646	1.02578	0.596583
	YGR274C	9.1	9.1	8.29	8.5219	-0.782982	-0.60656
	YGR276C	8.8	9.1	8.494	8.9932	-0.302218	-0.06841
	YGR277C	8	7.7	8.339	8.0972	0.38169	0.362659
	YGR279C	13.2	13.2	14.342	14.3843	1.14313	1.1605
	YGR280C	7.7	6.9	8.648	8.0292	0.960191	1.10992
	YGR282C	13	13.3	13.688	14.171	0.687829	0.910026
	YGR283C	7.4	6.8	7.556	7.0773	0.152657	0.239504
	YGR284C	10.2	10.2	10.961	10.963	0.772549	0.724585
	YGR285C	12.4	11.6	13.845	13.0764	1.47928	1.46695
	YGR286C	8.6	8.3	9.159	8.6183	0.553074	0.308304
	YGR287C	6.9	6.6	5.828	5.6124	-1.04938	-0.979763
	YGR289C	6.4	6.3	0.502	1.2785	-5.88542	-5.05092
	YGL263W	5.3	4.6	4.051	3.2374	-1.22722	-1.3752
	YGL256W	8	11.3	6.721	12.4328	-1.23247	1.10445
	YGL255W	12.2	13.7	12.301	13.6873	0.086597	0.015088
	YGL254W	6.7	6.3	7.45	7.0197	0.767216	0.7242
	YGL253W	13.6	13.4	14.336	14.4504	0.757225	1.01065
	YGL250W	6.4	6.2	6.527	6.8373	0.17471	0.648179
	YGL248W	8.4	8.5	7.74	7.7728	-0.705209	-0.704116
	YGL247W	6.3	6.3	5.713	5.1806	-0.600246	-1.12717
	YGL245W	13.5	13	14.126	13.6695	0.619476	0.630793
	YGL244W	9.4	9.4	10.313	10.24	0.864918	0.791795
	YGL243W	7.7	7.4	6.178	5.9173	-1.55604	-1.44717
	YGL241W	9.2	9.3	8.707	8.8163	-0.542545	-0.476233
	YGL240W	5.7	5.8	5.734	6.1717	0.000586	0.374043
	YGL238W	11.1	11	10.677	10.5921	-0.42457	-0.442772
	YGL234W	12.7	13.9	13.294	14.6953	0.589814	0.76177
	YGL233W	9.8	9.8	8.566	8.5418	-1.21574	-1.24359
	YGL232W	8.8	8.4	9.271	8.9359	0.46081	0.54144
	YGL228W	10.4	10.4	10.32	10.5413	-0.063812	0.148503
	YGL227W	9.4	9.6	8.303	8.74	-1.08323	-0.900891
	YGL226W	5.6	6.4	6.848	6.9722	1.23714	0.593193
	YGL225W	11.4	11.6	11.924	12.0959	0.541137	0.544562
	YGL220W	8.3	7.8	8.873	8.1463	0.587377	0.335682
	YGL216W	9.1	9.1	7.984	8.0272	-1.11983	-1.11553
	YGL215W	10.8	10.5	9.39	9.9827	-1.38041	-0.559375
	YGL212W	7.2	6.7	7.995	7.5803	0.746827	0.899556
	YGL211W	8.4	8.2	7.477	6.8981	-0.920232	-1.2857
	YGL210W	7.7	7.9	8.261	8.4282	0.607328	0.539156
	YGL209W	7.4	7.8	8.894	9.1844	1.50366	1.41665
	YGL208W	7.4	7.2	8.609	8.2839	1.19077	1.1135
	YGL207W	11.8	11.7	11.95	11.8088	0.123737	0.088945
	YGL202W	11.9	11.7	12.789	12.7457	0.876613	1.04878
	YGL198W	8.7	8.7	9.558	9.221	0.846156	0.547149
	YGL197W	10.7	10.6	8.939	9.0012	-1.71976	-1.61297
	YGL196W	8.7	8.9	8.409	8.5222	-0.331745	-0.415202
	YGL195W	13.9	13.4	12.931	12.6151	-0.925402	-0.752643
	YGL191W	9.1	9.2	10.776	10.5586	1.63587	1.35846
	YGL181W	8.7	8.7	9.905	9.7053	1.1962	0.996116
	YGL180W	8.3	8.4	7.301	7.7869	-0.962246	-0.587253
	YGL178W	9.5	9.7	9.439	9.7466	-0.021063	0.020406
	YGL174W	6.4	6.1	7.085	6.6087	0.667492	0.483563
	YGL172W	9.4	9.2	10.308	10.1193	0.893629	0.938835
	YGL171W	8.8	8.4	9.194	8.6836	0.413754	0.314474
	YGL169W	7.8	7.6	8.214	8.0197	0.442128	0.404262
	YGL166W	7.2	6.6	7.968	7.4478	0.766529	0.877755
	YGL162W	6.4	6.3	6.823	6.7324	0.455418	0.386355
	YGL160W	8.9	9.1	8.402	8.6467	-0.499185	-0.453483
	YGL159W	8	8.1	7.719	8.2067	-0.31952	0.109022
	YGL157W	9.7	10.3	10.116	10.8318	0.437624	0.562373
	YGL156W	9	10.8	8.307	10.2257	-0.741176	-0.557553
	YGL155W	8.4	8.3	7.363	7.3021	-1.07435	-0.968936
	YGL153W	7.7	7.4	8.447	8.1772	0.715415	0.75135
	YGL151W	9.8	9.7	8.93	9.071	-0.88636	-0.634622
	YGL148W	11.2	10.6	12.242	11.5215	1.01071	0.886949
	YGL145W	8.7	9	8.411	8.706	-0.29176	-0.289723
	YGL141W	9	9.2	8.174	8.6237	-0.83773	-0.609269
	YGL139W	9.8	9.9	9.204	9.1437	-0.547621	-0.762981
	YGL137W	12.3	12.3	12.079	12.1742	-0.240594	-0.076241
	YGL135W	14.9	14.2	15.495	14.7973	0.599202	0.602866
	YGL134W	7.2	7.2	5.911	6.2343	-1.24357	-1.01232
	YGL133W	9.2	9.1	7.875	7.8751	-1.28115	-1.21752
	YGL130W	8.4	8.3	8.897	8.9947	0.506073	0.714446
	YGL125W	10.8	10.3	10.561	10.3497	-0.227489	0.009098
	YGL123W	14.4	13.8	15.42	14.7852	1.01511	0.940243
	YGL119W	8.2	8.3	8.115	8.1568	-0.118331	-0.116431
	YGL117W	6.4	6.4	6.145	6.4451	-0.232926	0.032132
	YGL116W	8.7	8.5	9.151	9.0978	0.428188	0.601435
	YGL115W	9.6	9.4	9.635	9.6711	0.060019	0.223654
	YGL114W	8.9	9.3	7.932	8.288	-1.00306	-1.01342
	YGL113W	7.6	7.5	5.43	5.7774	-2.21138	-1.71693
	YGL111W	8.7	7.8	8.951	8.4346	0.262984	0.635317
	YGL106W	9.2	9	11.131	10.7882	1.90283	1.78729
	YGL105W	12.3	11.9	13.406	12.8974	1.15318	0.988882
	YGL103W	14.1	13.5	15	14.3156	0.907368	0.838452
	YGL101W	8.1	8.1	8.575	8.8394	0.474718	0.771701
	YGL100W	9.5	9.2	9.235	9.0058	-0.241757	-0.22974
	YGL099W	9.9	9.5	10.094	9.803	0.209249	0.317007
	YGL098W	6.9	7.3	7.209	7.3507	0.30809	0.004124
	YGL097W	9.9	9.4	10.14	9.6631	0.215297	0.295218
	YGL096W	6.9	7.5	6.731	7.7665	-0.17332	0.293005
	YGL093W	8.8	8.8	8.624	8.4191	-0.198376	-0.394979
	YGL092W	11	10.7	10.737	10.5552	-0.256725	-0.183037
	YGL090W	6.7	6.8	4.327	3.8162	-2.40936	-2.958
	YGL088W	14.8	15	11.07	11.5591	-3.71243	-3.47181
	YGL086W	9.2	9.1	8.397	8.4994	-0.814439	-0.622841
	YGL085W	6.2	6.3	5.15	5.0666	-1.01576	-1.2734
	YGL083W	8.5	8.5	7.727	7.9674	-0.734112	-0.581213
	YGL082W	8.8	9.1	9.035	9.4426	0.212999	0.381357
	YGL081W	5.5	4.9	5.992	5.382	0.524244	0.526409
	YGL080W	7.2	7.4	8.823	9.0276	1.6623	1.6258
	YGL079W	7.3	7.1	7.368	6.9952	0.085135	-0.070826
	YGL073W	9	8.8	8.954	8.7213	-0.066818	-0.078012
	YGL071W	8.7	8.8	8.394	8.4973	-0.279179	-0.267118
	YGL068W	9.1	9.4	10.341	10.5534	1.22087	1.18926
	YGL067W	8.5	8.9	8.45	8.6794	-0.090571	-0.198623
	YGL066W	8.3	8.2	9.084	8.855	0.764797	0.679312
	YGL063W	6.4	6.3	4.586	3.8214	-1.86223	-2.4649
	YGL062W	11.8	11.9	10.964	11.2526	-0.819801	-0.686708
	YGL060W	8.4	8.5	8.105	8.1547	-0.314545	-0.302487
	YGL059W	7.1	7.3	6.262	6.8067	-0.863007	-0.466688
	YGL058W	8.2	8.1	9.603	9.3634	1.38674	1.26616
	YGL055W	11.6	12.1	11.918	12.5048	0.355272	0.397047
	YGL050W	7.4	7.4	7.739	7.5796	0.324125	0.148385
	YGL047W	6.9	6.9	7.376	7.1082	0.512377	0.171114
	YGL045W	7.2	7.4	6.938	6.9664	-0.219475	-0.436601
	YGL043W	9.1	8.4	10.231	9.5518	1.09868	1.12735
	YGL041W-A	7	7.2	7.692	8.0193	0.686476	0.828234
	YGL039W	8.7	8.2	8.785	8.2103	0.05394	0.006264
	YGL036W	9.9	9.7	8.269	8.4889	-1.61256	-1.25812
	YGL030W	13	12.4	14.199	13.5419	1.18227	1.15098
	YGL029W	5.7	5.9	6.603	6.8957	0.950881	0.952465
	YGL022W	11.9	11.9	11.538	11.4396	-0.400994	-0.479549
	YGL021W	9.6	9.5	9.154	9.1269	-0.491988	-0.343003
	YGL019W	9.2	9	9.381	9.1573	0.14673	0.130047
	YGL017W	8	7.7	7.102	6.9661	-0.868623	-0.781156
	YGL016W	10.7	10.3	9.447	9.4511	-1.24843	-0.861984
	YGL014W	10.8	10.7	10.49	10.5864	-0.328592	-0.140058
	YGL012W	11.5	11.6	11.674	11.8305	0.206089	0.240334
	YGL010W	7	7	7.26	7.5904	0.216688	0.586861
	YGL006W-A	4	4.6	2.089	0.5816	-1.88267	-4.05111
	YGL006W	10.6	11.3	8.931	10.0039	-1.62593	-1.26891
	YGL002W	8.1	7.7	7.214	7.451	-0.893007	-0.295922
	YGR003W	8.2	7.9	7.276	7.1868	-0.906208	-0.675858
	YGR004W	8	7.6	7.636	7.4392	-0.388597	-0.135433
	YGR006W	6.1	6.2	6.905	7.027	0.778747	0.862133
	YGR007W	9	8.9	8.336	8.3043	-0.675355	-0.64233
[truncated: 3,300 more rows]

## Sheet: Sheet 5
	mORF name	mrna30 (log2)	mrna37 (log2)	ribo30 (log2)	ribo37 (log2)	te30 (log2)	te37 (log2)
	YAL067C	4.8	5.7	2.61	3.6	-2.17314	-2.06828
	YAL063C	7.6	8.2	4.32	2.87	-3.24865	-5.35115
	YAL054C	7.1	8	4.19	5.42	-2.93598	-2.58117
	YAL049C	9.1	9.1	9.85	9.98	0.727998	0.833923
	YAL047C	7.6	8	7.44	7.61	-0.159598	-0.375774
	YAL046C	7.9	7.8	8.24	8.04	0.337806	0.254188
	YAL044C	10.9	10.7	12.35	12.26	1.49859	1.57052
	YAL043C	9.9	10	10.01	9.96	0.087728	-0.04246
	YAL040C	9.9	9.8	9.01	9	-0.883069	-0.76924
	YAL039C	8.2	8.6	9.72	9.99	1.51786	1.37613
	YAL036C	9.8	10.2	10.59	11.07	0.802865	0.90493
	YAL034C	7.7	8.4	7.17	8.93	-0.530592	0.570267
	YAL032C	7.6	7.7	8.03	7.84	0.403112	0.111276
	YAL031C	8.6	8.8	7.9	8.18	-0.686847	-0.625964
	YAL029C	11.3	11.1	8.88	9.24	-2.40194	-1.90696
	YAL026C-A	7.3	6.7	4.51	3.99	-2.77805	-2.75344
	YAL026C	11	10.7	9.87	9.57	-1.17148	-1.13534
	YAL025C	8.4	8.4	9.23	9.22	0.839019	0.783414
	YAL024C	9.6	9.7	7.66	8.22	-1.91453	-1.49692
	YAL023C	12.4	12.2	12.44	12.26	0.023943	0.106043
	YAL022C	9.6	9.4	9.79	9.62	0.16612	0.220761
	YAL021C	10.7	10.8	10.98	10.92	0.239573	0.140107
	YAL020C	8	8.2	7.18	7.3	-0.807541	-0.924709
	YAL015C	7.5	7.9	7.3	7.59	-0.200569	-0.332658
	YAL014C	8	8.3	8.2	8.39	0.240028	0.118191
	YAL010C	7.2	7.6	7.27	7.54	0.09536	-0.042121
	YAL007C	9.6	9.2	10.47	9.98	0.857844	0.790817
	YAL005C	16.3	16.7	17.4	17.98	1.08756	1.31035
	YAL001C	9.9	9.8	8.66	8.39	-1.26159	-1.41143
	YAR002C-A	10.5	10.3	10.65	10.75	0.182157	0.501158
	YAR007C	10.1	9.7	10.93	10.57	0.814357	0.89062
	YAR014C	9.9	9.6	9.81	9.34	-0.066933	-0.223817
	YAR018C	8.7	8.5	8.21	8.32	-0.48832	-0.1877
	YAR019C	8.4	8.9	7.04	7.59	-1.39972	-1.28839
	YAR023C	5.8	5.8	1.73	2.24	-4.05372	-3.55246
	YAL064W-B	4.9	4.8	-1.85	-4.99	-6.70997	-9.76732
	YAL062W	6.7	8	5.79	7.89	-0.925676	-0.116055
	YAL061W	8.6	9.7	8.71	10.43	0.152271	0.713301
	YAL060W	10.6	10.8	10.76	11.34	0.175513	0.521016
	YAL059W	7.6	7.4	8.33	8.13	0.764951	0.738204
	YAL058W	8.9	9	7.75	8.37	-1.13917	-0.671547
	YAL056W	9.7	9.5	7.49	7.43	-2.23517	-2.08011
	YAL055W	6.1	6.5	6.71	6.63	0.616648	0.156536
	YAL053W	10.6	10.9	10.29	10.64	-0.316197	-0.27379
	YAL051W	9.2	9.7	8.61	9.32	-0.560939	-0.365745
	YAL044W-A	7.4	7	8.88	8.65	1.46012	1.60514
	YAL042W	10.9	10.7	10.61	10.59	-0.260806	-0.137781
	YAL041W	9.6	10	9.35	9.81	-0.287692	-0.165611
	YAL038W	17.3	16.7	17.99	17.62	0.725569	0.892897
	YAL037W	5.2	5.4	3.74	4.02	-1.45532	-1.38176
	YAL035W	12.7	12.5	13.19	12.98	0.443389	0.50614
	YAL034W-A	6.2	5.7	6.09	6.03	-0.138416	0.374308
	YAL033W	7.9	8.1	7.76	8.01	-0.167852	-0.120266
	YAL030W	7.7	7.9	8.87	9.31	1.13319	1.38113
	YAL028W	7.3	7.8	6.58	7.01	-0.729485	-0.740578
	YAL027W	6.5	6.5	6.78	6.83	0.296817	0.288238
	YAL019W	10.3	10.4	10.2	10.16	-0.091298	-0.193988
	YAL017W	10.8	11	9.81	10.29	-0.992746	-0.716503
	YAL016W	11	10.8	11.75	11.62	0.747998	0.77988
	YAL013W	8.4	8.7	8.94	9.18	0.550648	0.513424
	YAL012W	11.8	11.4	13.66	13.29	1.86132	1.87648
	YAL011W	7.5	7.5	6.7	6.75	-0.811113	-0.715623
	YAL009W	7.4	7.6	6.67	6.7	-0.73748	-0.888468
	YAL008W	8.1	8.4	9.35	9.82	1.28603	1.39406
	YAL003W	13.7	13.1	15.37	14.8	1.66501	1.7346
	YAL002W	9.8	9.9	7.49	7.77	-2.27488	-2.08986
	YAR002W	9.4	9.3	10.55	10.34	1.11776	1.0661
	YAR003W	8.4	8.4	7.4	7.59	-0.971511	-0.841804
	YAR008W	7.1	7	6.56	6.89	-0.492591	-0.075733
	YAR015W	11.3	9	11.99	9.6	0.678449	0.587659
	YAR027W	8.5	8.5	9.33	9.41	0.878996	0.898551
	YAR028W	7.9	8	8.18	8.64	0.30575	0.63538
	YAR029W	4.2	5.1	-0.26	-1.22	-4.43819	-6.3669
	YAR031W	7.7	7.7	7.46	7.82	-0.199427	0.153415
	YAR033W	6.9	6.7	7.39	7.26	0.437851	0.540425
	YAR035W	7	8.8	6.02	8.73	-0.982625	-0.112278
	YAR042W	10.7	10.9	9.85	10.07	-0.812492	-0.787493
	YAR050W	8	8.8	4.13	3.17	-3.91285	-5.59326
	YAR071W	7.7	7.5	7.15	7.49	-0.593734	-0.007565
	YBL113C	12.6	12.1	8.27	7.96	-4.33451	-4.08545
	YBL107C	6.8	6.8	7.61	7.55	0.788918	0.705445
	YBL106C	8.9	8.3	7.27	6.58	-1.60316	-1.75776
	YBL105C	10.5	10.2	9.41	9.33	-1.0771	-0.909096
	YBL104C	9.3	9.2	7.51	7.6	-1.77973	-1.64406
	YBL103C	7.8	7.7	8.44	8.43	0.602603	0.696254
	YBL101C	10.4	10.6	9.34	9.7	-1.05652	-0.941259
	YBL093C	8	8.1	8.91	9.12	0.952802	1.05051
	YBL091C-A	6.9	6.8	7.61	7.68	0.725295	0.851109
	YBL091C	10.6	10.1	11.16	10.7	0.529961	0.565384
	YBL088C	10.2	10.5	6.64	6.79	-3.58262	-3.7002
	YBL087C	13	12.4	14.14	13.76	1.1708	1.4006
	YBL086C	7.5	7.8	8.13	8.55	0.669459	0.735606
	YBL084C	8.4	8.6	7.75	8.3	-0.646541	-0.322159
	YBL080C	7.7	7.9	7.13	7.43	-0.596712	-0.494136
	YBL078C	6.3	6.5	8.26	8.69	1.99785	2.14921
	YBL076C	14.1	13.4	13.54	13	-0.520328	-0.400626
	YBL075C	8.3	8.7	3.24	6.25	-5.0745	-2.4355
	YBL074C	7.5	7.9	6.65	7.04	-0.806038	-0.877542
	YBL072C	14.9	14.1	15.68	15.01	0.81422	0.90469
	YBL067C	9.6	9.6	8.31	8.47	-1.27265	-1.09034
	YBL066C	9	9.3	7.78	8.04	-1.2654	-1.22689
	YBL064C	9.9	10.8	10.77	11.83	0.908049	1.00252
	YBL061C	9.4	9.5	9.11	9.33	-0.310043	-0.150833
	YBL059C-A	7.3	7.4	8.14	8.33	0.888908	0.887576
	YBL057C	8.3	8.6	8.57	9.37	0.22539	0.722165
	YBL055C	8.4	8.4	8.29	8.42	-0.159241	0.053757
	YBL052C	9.3	9.2	6.38	6.27	-2.92981	-2.97564
	YBL051C	10.4	10.1	11.12	10.81	0.765562	0.73553
	YBL047C	12.3	12.3	13.14	13.48	0.853713	1.15359
	YBL045C	10.9	10.9	12.14	12.49	1.26821	1.60561
	YBL042C	10.3	9.7	10.5	9.71	0.169739	0.043317
	YBL040C	9.2	9.3	9.65	9.92	0.496303	0.636224
	YBL039C	11.4	10.9	11.58	11.21	0.161636	0.287416
	YBL036C	9.1	9	9.85	9.84	0.748147	0.80162
	YBL035C	8.7	8.5	9.31	9.12	0.586058	0.592209
	YBL034C	9.6	9.8	8.87	9.17	-0.774064	-0.648993
	YBL033C	8.4	8.5	9.31	9.48	0.926544	0.964051
	YBL030C	12	11.6	13.16	13.22	1.1453	1.58095
	YBL029C-A	6	5.8	8.08	7.95	2.11251	2.18578
	YBL028C	7.6	7.1	8.58	8.07	0.936115	0.990113
	YBL023C	9.7	9.6	9.69	9.49	-0.047661	-0.136823
	YBL022C	11.6	11.6	11.67	11.92	0.080203	0.292801
	YBL021C	6.2	6.2	7.36	7.32	1.14132	1.09876
	YBL018C	7.5	7.6	7.51	7.43	-0.011279	-0.135106
	YBL017C	12.1	11.8	11.36	11.1	-0.731006	-0.660324
	YBL014C	8.8	9.1	6.1	6.52	-2.74019	-2.53961
	YBL010C	6.8	6.8	7.44	7.39	0.618171	0.639034
	YBL007C	12.4	12.1	12.72	12.36	0.332526	0.25588
	YBL006C	8.2	7.8	9	8.52	0.769305	0.701703
	YBL003C	11.8	11.2	12.97	12.68	1.16043	1.4398
	YBL001C	9.1	9.1	10.11	10.17	1.03164	1.07448
	YBR001C	9.8	10.5	9.11	9.82	-0.716623	-0.678899
	YBR002C	8	7.5	7.49	7.47	-0.5206	-0.066726
	YBR004C	8	8.3	7.69	7.78	-0.304263	-0.550829
	YBR007C	8.2	8.7	8.5	8.74	0.29308	0.041546
	YBR008C	7.9	8.1	-0.26	2.69	-8.12804	-5.40928
	YBR009C	11.9	11.7	13.26	13.23	1.4015	1.55428
	YBR011C	13.4	13.2	14.51	14.54	1.10933	1.32309
	YBR012C	5.9	6.5	3.88	4.13	-1.99077	-2.33887
	YBR013C	6.5	7.2	6.88	7.49	0.37703	0.251018
	YBR014C	8.4	8.6	9.34	9.43	0.895582	0.845165
	YBR015C	11	10.8	10.67	10.76	-0.324109	-0.086347
	YBR017C	11.2	11.2	10.65	11.01	-0.547028	-0.224895
	YBR018C	4.8	5.6	2.14	4.18	-2.63685	-1.41184
	YBR019C	4.3	5	2.85	3.73	-1.44775	-1.27471
	YBR023C	11	10.8	10.22	10.26	-0.805	-0.577051
	YBR025C	12.9	12.7	13.72	13.6	0.80856	0.898304
	YBR026C	9.9	10.2	10.65	10.93	0.739737	0.750201
	YBR028C	8.8	8.6	8.31	7.93	-0.528873	-0.63224
	YBR029C	10.3	10.2	10.76	10.66	0.467314	0.413104
	YBR034C	9.3	9.1	9.8	9.38	0.495854	0.312238
	YBR035C	10.1	9.8	11.18	10.86	1.11619	1.09203
	YBR036C	10.6	10.6	10.49	10.6	-0.144694	-0.005637
	YBR037C	8.4	8.5	8.81	9.11	0.416358	0.593838
	YBR042C	8.8	8.6	8.36	8.55	-0.460944	-0.022957
	YBR043C	8.6	8.8	6.46	6.68	-2.13198	-2.1323
	YBR044C	8.4	8.3	7.21	7.28	-1.23458	-0.984687
	YBR045C	6.8	7.1	5.24	4.73	-1.54894	-2.3235
	YBR046C	8.5	8.2	9.42	9.22	0.889095	0.969677
	YBR049C	10	10	10.89	10.79	0.854723	0.778938
	YBR050C	3.8	4.7	2.96	3.98	-0.886511	-0.734388
	YBR052C	10.1	10.3	10.42	10.82	0.298554	0.498823
	YBR053C	9.6	9.2	10.16	9.82	0.519285	0.574513
	YBR055C	9.5	9.3	8.71	8.72	-0.795922	-0.61333
	YBR057C	8.1	7.9	8.91	8.37	0.841274	0.466251
	YBR058C	9.9	9.9	10.1	9.89	0.222711	0.010117
	YBR058C-A	6.7	6.8	9.52	9.67	2.80628	2.87344
	YBR059C	11.1	11	10.58	10.82	-0.485879	-0.205111
	YBR060C	8.4	8.6	8.33	8.58	-0.022024	0.003659
	YBR061C	8.3	7.9	9.32	9.05	1.0155	1.17541
	YBR062C	7.4	7.4	8.76	8.69	1.34987	1.29276
	YBR063C	8.1	8.8	-0.27	0.36	-8.33076	-8.41315
	YBR065C	7.8	8.3	7.45	8.07	-0.394604	-0.260707
	YBR066C	7.8	7.8	8.72	8.83	0.891446	1.02603
	YBR067C	11.7	11.8	13.73	14.1	2.07274	2.28217
	YBR068C	11.4	11.4	11.21	11.39	-0.179107	-0.007296
	YBR069C	11	11.2	10.72	10.9	-0.315462	-0.25823
	YBR070C	7.5	7.5	7.27	7.53	-0.27822	0.04818
	YBR076C-A	5.3	6	2.8	4.79	-2.53694	-1.23564
	YBR077C	8.1	8.3	8.66	8.92	0.517534	0.577188
	YBR079C	12.5	12	12.44	12.14	-0.034122	0.115718
	YBR080C	10.8	10.6	11.5	11.28	0.664709	0.70424
	YBR081C	10	10.1	8.65	8.8	-1.39119	-1.26025
	YBR082C	10.3	10.7	12.99	13.02	2.65033	2.3646
	YBR084C-A	13.9	13.3	14.68	14.05	0.801928	0.718471
	YBR085C-A	9.7	10.9	11.13	12.75	1.4272	1.84119
	YBR086C	11.8	11.2	11.45	11.09	-0.355098	-0.146224
	YBR088C	9.9	9.5	10.74	10.61	0.860385	1.0848
	YBR089C-A	8.2	8.6	9.71	10.07	1.51808	1.42126
	YBR091C	6.9	6.7	8.05	8.28	1.18734	1.54936
	YBR092C	12.7	12.8	12.69	12.99	0.018903	0.155348
	YBR093C	9.8	10.4	10.39	11.02	0.621327	0.617089
	YBR095C	7.8	7.9	8.01	8.57	0.244204	0.714582
	YBR101C	9.3	9.5	9.92	10.37	0.64459	0.91314
	YBR102C	9	9.1	9.11	9.27	0.077099	0.126007
	YBR105C	7.3	7.9	7.68	8.43	0.41136	0.497865
	YBR107C	6.2	6.8	5.16	4.89	-0.992429	-1.88002
	YBR109C	10.5	10.1	12.25	12.1	1.76987	1.98353
	YBR111C	10	9.7	11.19	10.94	1.22025	1.22828
	YBR112C	11.8	11.5	11.48	11.55	-0.273149	0.04044
	YBR115C	11.9	12	11.99	12.31	0.059189	0.291087
	YBR120C	6.9	6.7	8.28	7.97	1.40965	1.29421
	YBR121C	13	12.5	13.07	12.9	0.076555	0.443745
	YBR122C	8.2	8.6	9.16	9.45	0.979286	0.864491
	YBR123C	8.7	8.6	8.86	8.57	0.141675	-0.000539
	YBR125C	8.5	8.9	7.64	7.98	-0.88854	-0.96808
	YBR126C	12.1	12.4	13.2	13.7	1.1485	1.31997
	YBR127C	13.5	13.1	14.18	13.89	0.674639	0.76875
	YBR128C	6	6.1	5.07	5.06	-0.937001	-0.995908
	YBR129C	8.3	7.9	7.78	7.4	-0.496915	-0.492031
	YBR130C	9	8.8	9.59	9.43	0.618851	0.643609
	YBR132C	9.6	9.8	9.23	9.48	-0.403935	-0.322212
	YBR133C	10.2	10	8.89	8.84	-1.30182	-1.14829
	YBR138C	8	8.2	8.44	8.32	0.420984	0.167037
	YBR140C	12	12.1	9.35	9.71	-2.61811	-2.42977
	YBR141C	6.2	6.9	6.76	7.3	0.575751	0.430239
	YBR143C	11.7	11.1	12.17	11.65	0.462062	0.516563
	YBR150C	8.9	8.7	7.78	7.48	-1.08378	-1.25518
	YBR154C	9.6	9.4	10.99	10.93	1.36136	1.56822
	YBR156C	7.7	8	7.96	8.2	0.217778	0.170057
	YBR157C	7.1	7.1	8.02	7.61	0.890871	0.518899
	YBR162C	12.8	12	12.59	12.01	-0.227178	-0.013385
	YBR164C	9.4	9	9.68	9.67	0.293873	0.652182
	YBR166C	8.9	8.8	8.74	8.61	-0.170019	-0.151354
	YBR167C	5.3	5.9	6.24	6.18	0.985531	0.328082
	YBR169C	10.4	10.7	10.56	10.97	0.144018	0.311036
	YBR170C	9.3	9.6	9.67	9.91	0.348883	0.30425
	YBR172C	9.6	9.7	10.08	10.17	0.501083	0.508329
	YBR173C	8.6	8.5	10.52	10.49	1.9467	1.96204
	YBR177C	10.9	10.8	11.7	12.04	0.849743	1.24793
	YBR179C	9.2	9.3	8.7	8.71	-0.479073	-0.582029
	YBR181C	14.8	14.1	15.58	14.99	0.782011	0.923196
	YBR182C	6.2	7.2	5.77	6.46	-0.438876	-0.74075
	YBR185C	8	8.2	8.65	8.9	0.613068	0.705948
	YBR188C	6.1	5.8	7.53	7.22	1.42656	1.42667
	YBR193C	7	7.2	8.23	8.37	1.24698	1.2122
	YBR195C	7.8	7.7	7.9	7.68	0.077583	-0.030791
	YBR196C	15.1	14.7	15.92	15.88	0.841197	1.17351
	YBR197C	7.2	7.3	7.49	7.46	0.278082	0.142593
	YBR198C	9.8	9.9	9.93	10.25	0.101615	0.355633
	YBR201C-A	4.1	3.9	5.51	6.01	1.43577	2.1586
	YBR204C	7.9	8.1	7.81	7.79	-0.123635	-0.288473
	YBR208C	9.8	9.7	7.95	7.96	-1.8742	-1.73076
	YBR211C	7.3	7.3	7.46	7.82	0.160773	0.514692
	YBR216C	8.7	8.8	8.45	8.44	-0.279089	-0.402625
	YBR218C	12.7	12.4	11.7	11.83	-0.96097	-0.595084
	YBR221C	11.9	11.3	12.45	12.03	0.499235	0.721535
	YBR222C	10.4	10.4	10.9	11.14	0.542849	0.732914
	YBR223C	7.7	7.9	5.93	6.26	-1.79203	-1.64011
	YBR229C	10.8	10.8	10.13	10.24	-0.62104	-0.518107
	YBR230C	8.8	9.4	10.55	11.22	1.75087	1.83913
	YBR231C	8	8.1	8.25	8.53	0.204196	0.48341
	YBR234C	11	11.1	11.31	11.05	0.299225	-0.059707
	YBR236C	9	9.2	9.13	9.3	0.11347	0.142601
	YBR238C	8.9	8.8	8.65	8.58	-0.229486	-0.231978
	YBR239C	7.2	7.6	7.03	7.47	-0.207521	-0.166792
	YBR240C	6.7	7.2	5.53	6.48	-1.15939	-0.740115
	YBR241C	8.6	9.2	8.63	9.44	0.024482	0.236515
	YBR243C	9.6	9.2	9.3	9.23	-0.256092	-0.006388
	YBR245C	10.5	10.3	10.75	10.47	0.244937	0.132731
	YBR247C	9.2	9.4	9.6	9.75	0.409274	0.393471
	YBR248C	10.4	9.7	10.57	10.05	0.198356	0.365395
	YBR249C	11.8	11.2	13.11	12.67	1.30281	1.47524
	YBR254C	7.2	7.5	8.06	8.36	0.882281	0.898271
	YBR255C-A	6.1	5.4	6.92	6.4	0.824302	0.970056
	YBR256C	9.6	9.7	9.25	9.52	-0.342632	-0.184087
	YBR258C	6.1	5.8	6.2	6.24	0.048397	0.418868
	YBR260C	9.1	9.3	9.2	9.4	0.132104	0.150461
	YBR261C	8.7	8.4	9.71	9.52	1.02836	1.12848
	YBR262C	7.3	7.4	7.6	7.69	0.296528	0.321016
	YBR264C	7.4	7.2	7.66	7.28	0.2613	0.053429
	YBR269C	7.9	8.1	9.44	9.63	1.52456	1.52698
	YBR270C	6.6	7.4	5.48	6.1	-1.13921	-1.28242
	YBR272C	8.6	8.7	8.21	8.41	-0.344164	-0.244679
	YBR273C	8.7	8.7	9.83	9.59	1.09844	0.881697
	YBR275C	10.2	10.4	8.85	9.06	-1.36784	-1.30463
	YBR276C	10	9.9	7.09	7.52	-2.92013	-2.3852
	YBR280C	8.1	8.6	7.85	8.42	-0.276971	-0.206406
	YBR281C	9.6	9.4	8.81	8.72	-0.771082	-0.664759
	YBR283C	11.7	11.4	11.89	11.85	0.183581	0.494431
	YBR288C	9.4	9.3	8.96	9.03	-0.418595	-0.224564
	YBR291C	6.7	7.4	6.75	7.87	0.017755	0.421864
	YBR298C	7.3	7.5	0.15	0.78	-7.13012	-6.70258
	YBL102W	9.4	9.3	9.63	9.9	0.271886	0.553234
	YBL099W	12.9	12.3	13.77	13.51	0.85524	1.19858
	YBL098W	9.4	9.5	9.58	9.62	0.145112	0.110318
	YBL097W	9	8.9	7.26	7.58	-1.73567	-1.34485
	YBL095W	8.3	8.3	6.6	7.2	-1.68034	-1.11582
	YBL092W	14	13.3	15.21	14.29	1.19537	0.966654
	YBL090W	7.3	7.6	8.39	8.48	1.07742	0.925517
	YBL089W	7.9	8.1	7.49	7.7	-0.36288	-0.374418
	YBL085W	9.7	9.9	9.84	9.97	0.097916	0.083694
	YBL081W	7.4	7.5	8.75	8.89	1.38728	1.41228
	YBL079W	11.5	11.7	9.85	10.11	-1.60363	-1.55099
	YBL071W-A	5.9	6.9	8.23	9.24	2.29944	2.37646
	YBL068W	8.8	8.7	9.29	9.25	0.491531	0.508822
	YBL063W	9.1	9.4	7.97	8.14	-1.11494	-1.26637
	YBL060W	7.7	8.4	7.28	7.78	-0.396902	-0.590548
	YBL059W	6.3	6.4	6.53	6.53	0.274958	0.112116
	YBL058W	10.6	10.6	11.76	11.82	1.12418	1.18312
	YBL056W	10.9	10.4	10.39	10.3	-0.484696	-0.14702
	YBL054W	7.3	7.9	8.04	8.34	0.716242	0.474547
	YBL050W	9.6	9.3	10.71	10.48	1.10373	1.17339
	YBL046W	7.7	7.6	8.27	8.43	0.553709	0.824276
	YBL041W	10.4	10.1	11.49	11.26	1.10452	1.18094
	YBL039W-B	4.6	4.7	5.32	5.04	0.743908	0.370568
	YBL038W	8	7.9	8.93	9.03	0.947471	1.1036
	YBL037W	9.6	9.5	8.84	9.25	-0.75591	-0.247259
	YBL032W	10.7	9.9	11.27	10.73	0.619508	0.814552
	YBL031W	6.8	7.3	7.21	7.22	0.372152	-0.054035
	YBL029W	6.2	6.7	7.41	7.8	1.22192	1.06182
	YBL027W	14	13.4	14.9	14.12	0.862752	0.717643
	YBL026W	8.1	7.7	8.46	8.26	0.391378	0.584341
	YBL025W	5.4	5.3	6.99	7.17	1.63745	1.89946
	YBL024W	10.9	10.6	11.44	10.99	0.486935	0.386167
	YBL020W	9.2	9.1	8.25	8.16	-0.931286	-0.989335
	YBL019W	7.2	7.3	6.24	6.42	-0.943282	-0.903494
	YBL016W	8.5	7.8	8.75	8.24	0.281691	0.41999
	YBL015W	9.4	9.3	10.03	9.88	0.604674	0.60939
	YBL011W	10.1	10	9.1	9.17	-1.01858	-0.852827
	YBL009W	8.9	8.7	9	8.84	0.118738	0.12879
	YBL008W	8.5	8.8	7.67	7.88	-0.808433	-0.903432
	YBL005W	8.6	8.4	7.55	7.27	-1.00893	-1.11143
	YBL004W	12.4	12.2	10.97	10.86	-1.40326	-1.36732
	YBL002W	11.2	11.2	13.27	13.25	2.11751	2.04048
	YBR003W	9.2	9.3	8.88	9.21	-0.283803	-0.102466
	YBR005W	7.3	7.4	7.25	7.57	-0.089812	0.218259
	YBR006W	8.3	9	8.47	9.48	0.141958	0.479645
	YBR010W	12.3	12	13.77	13.63	1.45474	1.66282
	YBR016W	8.2	8.3	10.69	10.58	2.46013	2.32405
	YBR020W	6.8	7	0.74	-0.22	-6.02771	-7.24695
	YBR021W	9.1	9.1	8.69	8.89	-0.384994	-0.207613
	YBR022W	7.2	7.5	7.71	8.15	0.548719	0.682938
	YBR024W	7.7	7.7	8.01	8.2	0.268626	0.50075
	YBR030W	8.5	8.6	6.85	7.08	-1.64608	-1.48723
	YBR031W	15	14.3	16.41	15.82	1.44109	1.56842
	YBR033W	4.8	6	4.06	5.46	-0.741292	-0.566439
	YBR038W	11	10.9	11.08	11.08	0.028631	0.136442
	YBR039W	10.7	10.2	11.97	11.56	1.27879	1.3907
	YBR041W	10.3	9.9	9.76	9.71	-0.564413	-0.192501
	YBR047W	4.7	6.1	5.34	6.58	0.691898	0.515474
	YBR048W	13.2	12.5	14.76	13.93	1.55876	1.4035
	YBR054W	12.2	13	12.54	13.61	0.324325	0.591961
	YBR056W	10.4	10.2	10.17	10.17	-0.219723	-0.065866
	YBR056W-A	3.8	5.3	4.82	6.25	1.05581	0.939847
	YBR071W	8.2	8.6	9.74	10	1.52286	1.40488
	YBR072W	9.6	12.5	11.25	14.49	1.69519	1.96161
	YBR073W	10.5	10.7	9.89	10.12	-0.565339	-0.609662
	YBR074W	10.8	10.6	9.78	9.65	-0.992992	-0.97349
	YBR076W	3.9	5.5	4.07	5.8	0.191203	0.342987
	YBR078W	14.2	13.6	14.84	14.65	0.631292	1.0999
	YBR083W	8.7	8.4	9.65	8.81	0.930443	0.360894
	YBR084W	12.1	11.8	11.71	11.5	-0.355627	-0.295625
	YBR085W	6.2	6.6	6.57	7.82	0.398321	1.19967
	YBR087W	8.9	8.7	8.98	8.96	0.120892	0.253133
	YBR094W	9.5	9.3	8.84	8.64	-0.680567	-0.70845
	YBR096W	9.3	9.6	9.86	10.09	0.544504	0.464928
	YBR097W	9.7	10	7.77	8.15	-1.91482	-1.82093
	YBR098W	7.4	7.5	7.08	7.23	-0.318073	-0.305083
	YBR103W	8.5	8.5	7.55	7.85	-0.982514	-0.635528
	YBR104W	8	7.6	8.11	7.97	0.138202	0.368109
	YBR106W	11.8	11.3	12.59	11.97	0.781186	0.718711
	YBR108W	9.1	9.4	10.28	10.56	1.23181	1.12585
	YBR110W	8.9	9.1	8.72	8.88	-0.216339	-0.257716
	YBR111W-A	6.3	5.7	7.34	6.78	1.03278	1.12327
	YBR114W	8.4	9.3	7.57	8.24	-0.817983	-1.08216
	YBR118W	18.4	18	19.13	18.92	0.751866	0.959448
	YBR119W	7.3	7.2	8	7.35	0.68888	0.141693
	YBR131W	7.7	8	6.69	6.99	-1.00227	-0.962519
	YBR135W	8.1	8.5	9.7	9.88	1.55601	1.39764
	YBR136W	10.2	10.4	7.74	8.02	-2.45411	-2.39365
	YBR137W	8.2	8.4	9.18	9.62	0.935988	1.25986
	YBR139W	10.7	11	11.06	11.53	0.347618	0.566064
	YBR142W	9.4	9.2	9.33	9.19	-0.042546	0.020236
	YBR145W	8.1	7.4	8.46	7.82	0.361374	0.406813
	YBR146W	9.1	8.8	9.32	8.76	0.191567	-0.024025
	YBR147W	6.2	6.5	5.89	6.63	-0.289331	0.167919
	YBR148W	5.8	5.9	6.02	6.29	0.171759	0.386172
	YBR149W	11	11	11.87	11.89	0.898375	0.920736
	YBR151W	9.7	9.6	9.9	9.94	0.211112	0.387615
	YBR152W	5.7	6.1	6.33	5.83	0.602838	-0.317246
	YBR153W	7.1	6.6	6.29	6.44	-0.766407	-0.176848
	YBR155W	8.1	8.1	9.01	8.85	0.933677	0.795386
	YBR158W	10.9	11	9.3	9.09	-1.55768	-1.90367
	YBR159W	10.5	10.1	10.75	10.6	0.247357	0.491222
	YBR160W	8.7	8.9	9.76	9.94	1.04842	0.994188
	YBR161W	8.4	8.4	8.16	8.64	-0.192595	0.250724
	YBR162W-A	8	7.6	9.39	9.21	1.43332	1.64377
	YBR163W	8.4	8.7	6.53	6.14	-1.8902	-2.51037
	YBR165W	7.4	7.9	7.92	8.26	0.504525	0.372926
	YBR168W	7.7	7.7	6.31	6.32	-1.36859	-1.42542
	YBR171W	8.5	8.3	9.63	9.57	1.11867	1.23397
	YBR175W	8.2	8.3	7.42	7.62	-0.734946	-0.664506
	YBR176W	7.7	8.1	7.98	8.42	0.267773	0.334447
	YBR183W	8.3	8.4	8.16	8.31	-0.159133	-0.079245
	YBR184W	6.5	6.8	5.96	6.07	-0.503343	-0.775088
	YBR186W	4	6	2.8	5.11	-1.16578	-0.858696
	YBR187W	10.1	9.8	10.1	10.17	-0.00673	0.414766
	YBR189W	13.6	12.9	15.04	14.51	1.40217	1.58202
	YBR192W	8.2	8.1	8.22	8.33	0.000652	0.239266
	YBR194W	5.5	6.6	6.36	7.01	0.839474	0.410496
	YBR199W	10.4	10.1	10.21	10.12	-0.205788	0.049836
	YBR200W	9.1	9	8.8	8.44	-0.305602	-0.542772
	YBR201W	6.9	7.1	6.96	7.38	0.026657	0.314552
	YBR202W	10.1	10	9.92	9.72	-0.155297	-0.27293
	YBR203W	8.7	8.8	7.54	7.95	-1.15856	-0.890858
	YBR205W	10.6	10.2	10.34	9.98	-0.228576	-0.235051
	YBR207W	9.1	9.1	8.8	8.86	-0.323644	-0.220228
	YBR210W	6.8	6.9	7.24	7.42	0.468662	0.520625
	YBR212W	9.3	9.4	10.55	10.51	1.23642	1.10462
	YBR213W	6.2	6.8	7.35	7.32	1.12401	0.549311
	YBR214W	9.5	9.8	10.68	10.89	1.13876	1.09063
	YBR215W	8.2	8.4	8.97	8.88	0.802579	0.512251
	YBR217W	6.6	6.8	5.71	6.02	-0.854449	-0.760521
	YBR225W	8.6	8.8	8.26	8.52	-0.333307	-0.330657
	YBR228W	6.6	6.7	5.84	5.72	-0.718497	-0.989583
	YBR230W-A	6.4	6.4	7.87	7.99	1.44943	1.59094
	YBR233W	7.7	7.7	8.62	8.4	0.919658	0.703564
	YBR233W-A	5.9	5.6	7.11	6.89	1.17664	1.26586
	YBR235W	10	10	8.34	8.3	-1.62586	-1.66367
	YBR237W	8.6	8.6	7.03	6.74	-1.5638	-1.86797
	YBR242W	8	7.7	8.62	8.24	0.651035	0.577673
	YBR244W	8.9	7.2	10.2	7.95	1.29225	0.744807
	YBR246W	8.7	8.9	8.01	8.43	-0.708452	-0.445147
	YBR250W	5.7	6.8	3.23	4.07	-2.41918	-2.73577
	YBR251W	8	7.9	9.09	8.97	1.04662	1.03157
	YBR252W	8.9	8.9	10.13	10.4	1.22138	1.49265
	YBR253W	6.8	7	7.31	7.53	0.503408	0.553562
	YBR255W	8.1	8.5	6.9	7.37	-1.23363	-1.15444
	YBR257W	6.6	7	7.34	7.46	0.763594	0.490196
	YBR259W	8	8.3	5.79	6.49	-2.17897	-1.81265
	YBR263W	11.9	11.3	12.32	11.85	0.396377	0.528406
	YBR265W	8.8	8.4	9.06	8.82	0.229686	0.37621
	YBR267W	8.2	8.2	9.28	9.17	1.06838	0.994955
	YBR268W	8	7.9	8.42	8.44	0.396339	0.51726
	YBR271W	7.7	7.8	7.6	7.37	-0.061855	-0.467255
	YBR274W	8.4	8.4	7.65	7.84	-0.710153	-0.575235
	YBR278W	7.1	7.2	7.46	7.41	0.405994	0.176619
	YBR279W	9.2	9.1	9.41	9.5	0.258587	0.428715
	YBR282W	7.1	6.9	8.79	8.57	1.67504	1.6463
	YBR284W	6.8	7.4	5.36	4.93	-1.40458	-2.49305
	YBR285W	3.7	4.7	5.06	6.37	1.39649	1.6891
	YBR286W	13.2	13.2	13.63	13.81	0.386471	0.658821
	YBR287W	9.8	10.1	9.79	10.6	-0.046643	0.486006
	YBR289W	9.2	9.6	9.66	9.97	0.430354	0.392912
	YBR290W	7.9	8.2	8.44	8.74	0.582647	0.528519
	YBR293W	7.4	7.7	5.23	5.36	-2.21494	-2.33432
	YBR295W	8.8	9.2	5.67	6.73	-3.12076	-2.44316
	YBR297W	6.2	6.3	5.78	6.01	-0.461643	-0.253249
	YBR299W	5.3	6	5.12	5.22	-0.142222	-0.816773
	YCL064C	10.3	10.9	10.82	11.58	0.511841	0.688097
	YCL061C	9.2	9	8.97	8.64	-0.227246	-0.346923
	YCL059C	9.4	8.9	9.99	9.57	0.563258	0.70819
	YCL057C-A	9.3	9.4	10.76	10.82	1.47534	1.39212
	YCL056C	5.6	5.4	4.53	4.36	-1.09951	-1.04817
	YCL052C	8.8	8.9	8.1	8.03	-0.736397	-0.818419
	YCL050C	10.7	10.7	12.43	12.44	1.77237	1.74905
	YCL049C	8.1	8.2	8.08	8.48	-0.011489	0.271129
	YCL047C	7.8	8.6	8.11	8.97	0.313333	0.400086
	YCL045C	11.5	11.4	11.61	11.5	0.162951	0.061088
	YCL044C	8	8.4	8.92	9.48	0.949798	1.1
	YCL043C	13.7	13.9	14.33	14.8	0.666779	0.940493
	YCL041C	9.5	9.5	10.92	11.3	1.38721	1.74822
	YCL038C	8.5	8.9	8.06	8.6	-0.455785	-0.268307
	YCL037C	11.5	11.5	12.92	12.8	1.40928	1.25586
	YCL035C	8.7	9.3	11.38	11.87	2.63385	2.56596
	YCL033C	8.4	8.9	9.26	9.92	0.812383	1.02932
	YCL031C	8.8	8.6	9.13	8.96	0.304389	0.382113
	YCL030C	12.7	10.7	13.04	11.07	0.360875	0.356493
	YCL029C	7.7	7.5	8.4	8.11	0.696504	0.654409
	YCL026C-B	6.5	7.7	8.79	10.17	2.28809	2.466
	YCL026C-A	3.4	4.4	4.28	5.63	0.869592	1.24677
	YCL025C	9.9	10.1	9.91	10.31	0.042985	0.205567
	YCL017C	10.5	10.3	10.9	11.01	0.444528	0.684388
	YCL016C	7.4	7.7	7.52	7.67	0.128158	0.021883
	YCL012C	6.6	7.1	7.05	7.38	0.500385	0.313492
	YCL011C	10.7	10.3	10.68	10.17	-0.064316	-0.106042
	YCL010C	8.2	8.2	8.09	8.4	-0.055841	0.240198
	YCL009C	12	11.6	12.43	12.16	0.442062	0.52114
	YCL008C	8.1	8.4	8.87	8.92	0.735758	0.52145
	YCL002C	7.2	7.3	5.89	5.9	-1.29123	-1.42304
	YCR002C	9.8	9.5	10.17	10.05	0.386633	0.54114
	YCR004C	10.5	10.4	11.66	11.89	1.15199	1.44323
	YCR005C	11.6	11.1	11.87	11.2	0.233604	0.088658
	YCR007C	5.9	5.9	4.77	6.01	-1.14873	0.100464
	YCR009C	10	9.3	10.96	10.94	1.00432	1.65166
	YCR011C	11.2	11.2	10.22	10.56	-0.990641	-0.626344
	YCR014C	7.2	7.4	-5.61	2.36	-12.8056	-5.05106
	YCR015C	7.3	7	6.68	6.62	-0.58898	-0.418486
	YCR017C	11.2	10.8	10.46	10.24	-0.716554	-0.563628
	YCR020C	6	6.6	5.24	6.2	-0.800142	-0.444791
	YCR020C-A	6.7	6.6	7.63	7.78	0.896088	1.21263
	YCR021C	7.8	10.8	8.14	11.56	0.316782	0.784426
	YCR023C	9.2	9	7.74	7.66	-1.47834	-1.29019
	YCR024C	7.3	7.8	7.03	7.25	-0.287051	-0.51985
	YCR024C-B	10.6	10.5	1.15	2.1	-9.40563	-8.36474
	YCR024C-A	10.6	10.2	12.03	11.92	1.45867	1.6774
	YCR025C	3.8	4.6	-0.27	-1.22	-4.05467	-5.84497
	YCR026C	9.5	9.5	8.63	8.37	-0.905595	-1.17124
	YCR027C	6.8	7.1	7.1	7.18	0.273596	0.10333
	YCR028C	8.4	8.5	7.67	8.08	-0.687307	-0.400186
	YCR028C-A	9.3	8.9	11.51	11.18	2.19816	2.24978
	YCR030C	10.4	10.1	10.91	10.87	0.557384	0.792672
	YCR031C	14	13.4	14.99	14.42	1.03072	1.04073
	YCR035C	8.1	8	8.59	8.53	0.468988	0.498872
	YCR037C	10	9.8	9.24	9.19	-0.728639	-0.64165
	YCR038C	6.8	7.5	5.87	6.38	-0.958712	-1.13885
	YCR042C	10.5	10.7	9.24	9.57	-1.31012	-1.17089
	YCR043C	8.6	8.5	9.14	9.13	0.530407	0.60693
	YCR044C	8.8	8.6	8.27	7.93	-0.565314	-0.631597
	YCR046C	8.5	8.6	9.52	9.76	1.04452	1.16709
	YCR047C	7.8	8	8.37	8.96	0.608421	0.962268
	YCR054C	7.8	8.3	7.97	8.33	0.167536	0.070685
	YCR057C	10.4	10.4	9.68	9.73	-0.696175	-0.700509
	YCR059C	9.1	8.9	8.65	8.79	-0.454752	-0.076859
	YCR067C	10.5	10.7	10.18	10.7	-0.367424	-0.015242
	YCR071C	6.8	6.9	8.31	8.44	1.49334	1.51919
	YCR072C	8.7	9.1	9.26	9.54	0.528582	0.467889
	YCR073C	8.2	8.8	5.95	6.86	-2.29304	-1.91196
	YCR075C	8.1	7.6	7.76	7.6	-0.339109	-0.032197
	YCR076C	7.9	7.9	8.79	8.76	0.900877	0.890412
	YCR077C	10.7	10.2	11.53	11.12	0.81809	0.929733
	YCR084C	11.5	11.1	11.74	11.65	0.210319	0.552321
	YCR087C-A	7.5	7.1	8.79	8.45	1.31219	1.31972
	YCR090C	8.9	8.9	8.57	8.36	-0.336474	-0.509698
	YCR092C	9.2	9.4	8.31	8.71	-0.897349	-0.710749
	YCR095C	7.6	7.6	6.86	7.27	-0.728451	-0.322495
	YCR098C	5	5.3	1.48	2.68	-3.49414	-2.59718
	YCR102C	5.5	5.1	3.9	2.24	-1.55915	-2.87143
	YCL063W	8	7.9	8.25	8.01	0.221335	0.14132
	YCL058W-A	5.1	5.6	6.79	7.09	1.66413	1.45482
	YCL057W	11.4	11.4	11.29	11.41	-0.128443	-0.013283
	YCL055W	7.6	7.6	8.53	8.46	0.883338	0.885795
	YCL054W	9.8	9.8	10.12	10.15	0.316582	0.333069
	YCL051W	8.4	8.5	8.55	8.66	0.165834	0.206274
	YCL040W	13.2	13.6	13.85	14.49	0.678257	0.85253
	YCL039W	9.1	9	8.63	8.69	-0.438721	-0.353893
	YCL036W	7.6	8.5	6.65	7.72	-0.931293	-0.763125
	YCL034W	9.3	9.3	9.97	9.93	0.663735	0.632284
	YCL032W	7.3	7.1	7.61	7.3	0.315821	0.158736
	YCL028W	10.7	10.2	12.36	12.07	1.62583	1.83035
	YCL027W	7.3	6.2	7.87	6.01	0.536916	-0.213907
	YCL024W	9.1	9.1	8.21	7.93	-0.886454	-1.15574
	YCL021W-A	7	6.8	2.79	3.59	-4.24834	-3.16612
	YCL014W	10.7	10.9	9.65	9.94	-1.08449	-0.992607
	YCL005W-A	7.7	7.6	10.42	10.29	2.676	2.7319
	YCL005W	7.5	7.6	7	7.11	-0.544749	-0.463481
	YCL004W	7.5	8	6.19	7.08	-1.34393	-0.916725
	YCL001W	8.7	8.6	9.95	10.08	1.2745	1.43942
	YCR003W	7.1	7.2	8.39	8.48	1.25886	1.31923
	YCR008W	10	10.3	9.13	9.62	-0.906621	-0.65646
	YCR012W	17.1	16.7	18.01	17.91	0.936342	1.20744
	YCR016W	7.9	7.1	8.86	8.1	1.0074	1.01891
	YCR019W	7.3	7.3	6.68	6.76	-0.634146	-0.555413
	YCR020W-B	5.6	5.4	6.76	6.5	1.20575	1.13421
	YCR032W	10.1	10.4	7.15	7.77	-2.93122	-2.62049
	YCR033W	10.2	10.4	9.23	9.42	-0.972535	-0.989573
	YCR034W	11	10.2	11.64	11.1	0.652914	0.865846
	YCR036W	9.1	9.2	9.25	9.39	0.19601	0.156009
	YCR045W-A	5.2	4.8	-5.61	-4.99	-10.8181	-9.75771
	YCR048W	9.6	10.3	9.34	9.99	-0.267945	-0.257277
	YCR051W	8.7	8.4	9.82	9.66	1.09894	1.29834
	YCR052W	9.2	9.2	9.59	9.43	0.400738	0.272261
	YCR053W	12.3	12	13.5	13.29	1.17708	1.31342
	YCR061W	9.8	10.1	10.47	10.76	0.70582	0.689726
	YCR063W	6.6	6.7	7.1	6.81	0.451714	0.096578
	YCR065W	9.9	9.6	10.29	9.88	0.392018	0.243966
	YCR066W	7	7.2	7.1	7.24	0.114727	0.00603
	YCR068W	8.7	9	7.49	7.98	-1.2071	-1.00608
	YCR069W	9.6	9.6	10.25	10.16	0.679718	0.567164
	YCR073W-A	8.9	9.5	9.87	10.45	0.970707	0.969607
	YCR075W-A	5.8	5.9	8.23	8.42	2.46934	2.52508
	YCR079W	8	8.2	6.05	6.36	-1.98531	-1.8575
	YCR081W	9.5	9.7	7.8	8.04	-1.71271	-1.61885
	YCR082W	8.5	9.3	9.03	9.77	0.535272	0.496199
	YCR083W	8	8.6	8.51	9.06	0.475701	0.456127
	YCR086W	6.3	7.1	8.16	8.59	1.85174	1.4838
	YCR088W	11.8	11.4	13.78	13.53	2.00345	2.17305
	YCR089W	8.8	9.1	6.66	4.03	-2.18689	-5.05325
	YCR091W	7.7	8.2	7.52	7.7	-0.195411	-0.475912
	YCR093W	12.4	12.5	11.34	11.58	-1.0797	-0.912511
	YCR094W	8.9	8.9	8.64	8.72	-0.251596	-0.195359
	YCR097W	7.3	7.6	8.26	8.36	0.992853	0.761368
	YCR105W	4.2	4	4.24	4.13	0.057244	0.130217
	YCR106W	8.1	7.5	5.75	5.6	-2.32396	-1.89281
	YCR107W	7.5	7	-0.26	-4.99	-7.7792	-11.9802
	YDL243C	6.5	6.6	1.47	2.48	-5.00116	-4.11934
	YDL239C	8	8.4	-1.85	0.36	-9.81331	-8.02523
	YDL238C	8	8.2	6.21	6.97	-1.79737	-1.27626
	YDL235C	8.5	8.9	9.37	9.75	0.824357	0.848487
	YDL234C	8.9	9.2	8.68	8.77	-0.263589	-0.441034
	YDL231C	9.3	9.4	4.38	5.52	-4.90283	-3.87082
	YDL227C	10	9.4	9.99	9.31	-0.024421	-0.112622
	YDL226C	10.3	10.2	11.33	11.09	1.02105	0.92481
	YDL224C	9.8	9.5	9.72	9.78	-0.038272	0.262317
	YDL222C	6.8	7.9	6.51	8.29	-0.264274	0.424698
	YDL220C	8.4	8.7	6.95	7.24	-1.49769	-1.49982
	YDL217C	7.4	7.4	8.66	8.82	1.22425	1.37288
	YDL216C	7.1	7.2	6.56	6.54	-0.530813	-0.643077
	YDL215C	9.8	10.2	8.68	9.32	-1.09291	-0.862282
	YDL214C	5.6	7	3.61	5.35	-2.01581	-1.64578
	YDL213C	8.4	7.7	9.73	8.86	1.3187	1.1132
	YDL211C	6.3	6	5.96	5.65	-0.296503	-0.350607
	YDL209C	7	6.8	7.07	6.92	0.041285	0.158381
	YDL205C	9.5	9.4	9.21	9.14	-0.273182	-0.208334
	YDL203C	8.6	8.8	8.5	8.48	-0.12744	-0.30548
	YDL200C	6.6	7.1	6.65	6.69	0.003352	-0.387755
	YDL199C	7.4	7.8	6.9	7.23	-0.498788	-0.538303
	YDL198C	9.1	8.2	10.02	9.15	0.945639	0.930152
	YDL197C	8	8.3	5.86	5.08	-2.10467	-3.19827
	YDL190C	10.5	10.4	10.22	10.65	-0.273205	0.202474
	YDL188C	10.3	10.1	10.25	10.48	-0.046743	0.395399
	YDL184C	8.8	8.1	12.18	10.82	3.42283	2.69864
	YDL183C	6	6.3	5.81	5.84	-0.20728	-0.458581
	YDL177C	6.2	6.3	5.67	6.21	-0.525639	-0.092889
	YDL175C	7.3	7.6	8.33	8.61	1.07371	1.00121
	YDL174C	9.8	10.2	9.32	10.13	-0.486792	-0.071884
	YDL171C	13.8	13.1	12.45	12.17	-1.3054	-0.953009
	YDL169C	5.5	6.1	5.15	5.83	-0.3922	-0.217413
	YDL167C	9.6	9.5	8.66	8.44	-0.903313	-1.03448
	YDL166C	8.4	8.3	9	9.15	0.602702	0.83155
	YDL164C	9.4	9.4	9.3	9.19	-0.093929	-0.179082
	YDL160C-A	6.6	6.4	7.55	7.45	0.936311	1.02701
	YDL160C	11.4	11.5	12.68	12.86	1.2737	1.3314
	YDL157C	8.5	8.8	9.56	10.03	1.06404	1.27078
	YDL153C	9.3	9	9.7	9.29	0.421721	0.328364
	YDL148C	9.6	9.6	10.08	9.89	0.494419	0.335548
	YDL145C	12.9	12.5	12.17	12.27	-0.686486	-0.193399
	YDL144C	9	8.9	8.49	8.74	-0.519389	-0.167687
	YDL142C	7.1	7.5	7.56	7.67	0.484987	0.211603
	YDL140C	13.4	13	12.52	12.28	-0.901005	-0.693451
	YDL139C	5.5	5.9	6.41	6.68	0.919977	0.797266
	YDL135C	8.9	9	10.17	10.27	1.2512	1.29727
	YDL134C	10.4	10.1	10.34	10.59	-0.014234	0.466287
	YDL133C-A	9.1	8.6	12.17	10.87	3.08223	2.2358
	YDL126C	13.9	13.7	14.3	14.26	0.41622	0.584585
	YDL125C	10.2	10.5	11.46	11.72	1.23479	1.26297
	YDL121C	8.3	8	8.73	8.6	0.453354	0.553771
	YDL119C	6.9	6.9	7.52	7.72	0.609195	0.794471
	YDL115C	7.7	7.7	8.03	7.59	0.289274	-0.079292
	YDL113C	8.9	8.8	8.56	8.87	-0.306586	0.028044
	YDL111C	8.5	8.8	8.85	9.16	0.398505	0.327441
	YDL110C	8.2	8.9	9.73	10.62	1.54049	1.7022
	YDL109C	7.3	7.7	4.24	4.59	-3.05807	-3.13499
	YDL106C	8	8.2	8.47	8.88	0.498011	0.719743
	YDL104C	5.8	5.8	5.6	5.3	-0.249075	-0.479023
	YDL103C	9.7	9.6	11.03	10.86	1.3547	1.24318
	YDL101C	8.4	8.7	8.6	8.73	0.164182	0.01424
	YDL100C	11.4	11.3	12.1	12.26	0.677198	0.973764
	YDL098C	6.6	6.6	7.13	7.19	0.56506	0.546243
	YDL097C	10.9	11.1	11.63	11.8	0.702234	0.718975
	YDL091C	7.9	8	7.72	7.8	-0.139349	-0.171946
	YDL090C	8	7.9	7.56	7.45	-0.483467	-0.480537
	YDL088C	9.2	9.6	9.36	9.39	0.189748	-0.206456
	YDL087C	6.7	7.3	7.3	7.65	0.632231	0.357513
	YDL086C-A	4.3	5.5	1.61	3.69	-2.69409	-1.76542
	YDL085C-A	6.7	6.5	8.11	7.86	1.38369	1.32778
	YDL083C	13	12.3	14.32	13.64	1.36531	1.32597
	YDL081C	13	12	14.03	13.37	1.07692	1.37828
	YDL080C	8.6	8.7	6.72	7.12	-1.88997	-1.5475
	YDL079C	5.5	7	3.19	4.94	-2.33404	-2.02853
	YDL078C	10.3	9.9	11.11	10.91	0.77829	1.04025
	YDL077C	9.4	9.7	7.89	8.12	-1.51144	-1.53492
	YDL076C	8.2	8.2	8.42	8.16	0.230528	-0.047201
	YDL074C	9.6	9.4	9.53	9.31	-0.120361	-0.085336
	YDL072C	10	10.1	10.81	10.86	0.818326	0.804833
	YDL069C	6.3	6.2	5.83	5.3	-0.435689	-0.912491
	YDL067C	7.4	6.7	9.43	9.25	1.9829	2.58438
	YDL065C	8.3	8.2	9.25	9.26	0.926978	1.01592
	YDL063C	8.9	9.1	8.5	8.51	-0.426822	-0.549656
	YDL061C	10.4	9.6	13.05	12	2.64627	2.35825
	YDL059C	6	6.3	5.59	6.24	-0.410992	-0.025931
	YDL055C	14	13.5	14.9	14.66	0.9247	1.20767
	YDL054C	8.5	8.7	8.64	9.03	0.131791	0.301426
	YDL053C	8.7	8.4	9.96	10.12	1.25225	1.72304
	YDL052C	9.9	9.9	10.26	10.32	0.311044	0.45216
	YDL049C	6	6	5.66	5.74	-0.313422	-0.2336
	YDL048C	7.2	8.1	8.5	9.32	1.31002	1.24401
	YDL045C	7.7	7.9	7.47	7.71	-0.249729	-0.239147
	YDL044C	7.3	7.7	7.26	7.48	-0.0575	-0.178796
	YDL043C	7.2	7.3	8.22	8.28	0.994679	0.965973
	YDL042C	8.4	8.6	8.37	8.52	-0.04776	-0.052342
	YDL040C	11.6	11.1	11.44	10.89	-0.178914	-0.239457
	YDL039C	4.9	6.3	5.65	5.38	0.714624	-0.897065
	YDL036C	7.7	7.9	7.82	7.68	0.100129	-0.242917
	YDL035C	9.7	9.8	8.5	8.41	-1.24566	-1.43337
	YDL033C	7.2	7.6	6.11	6.31	-1.05272	-1.26176
	YDL028C	8.9	9	8.32	8.35	-0.540354	-0.642529
	YDL027C	8.4	8.6	7.77	7.8	-0.612238	-0.764869
	YDL025C	9.1	8.9	9.19	8.47	0.128506	-0.447872
	YDL024C	5.6	5.7	3.5	4.43	-2.08144	-1.313
	YDL020C	9.4	9.8	9.75	10.3	0.30977	0.447666
	YDL019C	11	10.9	10.37	10.21	-0.590523	-0.688518
	YDL018C	8	8.2	8.12	8.15	0.067041	-0.021653
	YDL015C	10.6	10.5	11.57	11.59	0.956176	1.08802
	YDL012C	7.6	7.9	10.07	9.99	2.43337	2.07806
	YDL005C	8.5	8.4	8.6	8.74	0.07368	0.295615
	YDL002C	7.5	7.3	8.21	8.25	0.666191	0.969746
	YDR001C	11.4	11.8	11.26	11.92	-0.113296	0.101287
	YDR005C	8.5	8.5	8.24	8.17	-0.226978	-0.35662
	YDR006C	9.9	10.3	9.31	9.72	-0.571889	-0.561166
	YDR016C	7.5	7.1	7.7	7.11	0.179072	-0.020054
	YDR017C	9.9	9.9	9.36	9.52	-0.563261	-0.329839
	YDR018C	5.2	6.1	5.26	6.2	0.041936	0.056448
	YDR019C	11	10.3	11.41	10.74	0.390585	0.479211
	YDR020C	6.4	7	6.48	6.57	0.071471	-0.408804
	YDR022C	7.1	7.1	6.97	6.96	-0.168014	-0.146981
	YDR026C	8.2	8.3	7.3	7.55	-0.870085	-0.77367
	YDR027C	9.6	9.6	8.32	8.46	-1.28102	-1.17782
	YDR028C	11.2	11.2	11.02	11.03	-0.159576	-0.14667
	YDR030C	6.7	7.5	5.5	6.34	-1.18424	-1.1626
	YDR032C	10.8	11.3	12.48	13.17	1.6378	1.86027
	YDR034C	9.3	9.5	8.59	9.08	-0.670821	-0.464199
	YDR036C	9.2	8.8	9.37	9.02	0.136041	0.227085
	YDR038C	11.9	12.1	10.65	11.19	-1.29748	-0.934803
	YDR042C	4.7	5.6	4.56	4.93	-0.102495	-0.66615
	YDR045C	7.5	7.6	8.52	8.6	1.04698	0.983062
	YDR046C	10.6	10.4	10.28	10.12	-0.352251	-0.246185
	YDR050C	15.3	14.9	16.56	16.47	1.26798	1.53965
	YDR051C	8.7	8.5	8.73	8.56	0.026499	0.013732
	YDR052C	9.1	9.1	8.73	8.93	-0.389604	-0.203182
	YDR054C	9	8.9	9.79	9.94	0.777281	1.01375
	YDR056C	8.4	8.1	9.1	9.02	0.688421	0.934575
	YDR058C	6.8	7.3	6.57	7.23	-0.26942	-0.11663
	YDR059C	6.6	6.7	8.24	8.67	1.6482	1.98161
	YDR066C	5.6	6.2	5.65	6.53	0.031046	0.317252
	YDR067C	7.3	7.3	7.04	6.7	-0.246123	-0.635929
	YDR069C	9.1	9.6	8.51	8.82	-0.582176	-0.751485
	YDR070C	4.9	6.2	6.4	7.66	1.49273	1.47622
	YDR071C	9.9	9.7	10.83	10.53	0.891054	0.798004
	YDR072C	9.3	9.3	9.06	9.25	-0.265278	-0.003998
	YDR078C	5.8	6.4	4.13	4.61	-1.68012	-1.77389
	YDR079C-A	6.5	6.8	7.13	7.26	0.612825	0.508426
	YDR081C	9.2	9.4	8.54	9.18	-0.630218	-0.188334
	YDR084C	8.3	8.3	9.14	9	0.838582	0.653377
	YDR085C	8.7	8.9	7.72	7.95	-1.00363	-0.926126
	YDR086C	9.5	8.9	11.37	10.7	1.89586	1.80093
	YDR087C	8.4	8.3	9.12	9.1	0.739103	0.800888
	YDR088C	7.1	6.9	7.64	7.67	0.565432	0.730422
	YDR090C	7.3	7.4	7.39	7.54	0.100156	0.143162
	YDR091C	11.2	10.8	11.6	11.13	0.369907	0.383855
	YDR097C	10.3	10.2	9.81	9.9	-0.523191	-0.312948
	YDR098C	10	9.8	11.41	11.11	1.44261	1.33036
	YDR101C	9.9	9.7	10.1	9.96	0.173187	0.275427
	YDR104C	8.4	8.6	6.52	6.62	-1.85837	-1.93729
	YDR105C	9.3	9.5	8.86	9.05	-0.440582	-0.434797
	YDR107C	9.4	9.4	8.8	9	-0.584737	-0.445035
	YDR109C	8.2	8.6	7.41	7.57	-0.828599	-0.992866
	YDR111C	9	8.5	8.9	8.59	-0.073228	0.083378
	YDR113C	7.5	7.4	8.9	8.59	1.36686	1.22727
	YDR116C	8.4	8.2	9.12	8.93	0.762612	0.727145
	YDR117C	8.9	8.3	9.54	8.87	0.620519	0.560195
	YDR120C	9.9	9.8	9.75	9.89	-0.16048	0.104545
	YDR123C	6.8	7.6	7.29	7.77	0.50051	0.192023
	YDR125C	6.6	6.9	5.49	4.95	-1.11629	-1.99845
	YDR129C	12	12.1	12.89	13.18	0.911513	1.10046
	YDR130C	7.7	7.6	8.03	8.19	0.368678	0.595941
	YDR131C	7.4	7.9	6.33	7.16	-1.0666	-0.760641
	YDR132C	6.7	6.6	6.29	5.74	-0.408247	-0.827956
	YDR133C	10.6	10.3	4.97	4.87	-5.62192	-5.46085
	YDR135C	11.9	11.7	10.84	10.71	-1.10431	-0.975448
	YDR139C	6.9	6.9	8.28	8.06	1.36732	1.1267
	YDR141C	11.1	11.3	9.89	10.22	-1.23928	-1.04534
	YDR142C	7.2	7.2	6.66	6.72	-0.512021	-0.470588
	YDR143C	9.2	8.9	9.42	8.95	0.219033	0.087353
	YDR144C	10	9.8	9.08	8.91	-0.934197	-0.907728
	YDR146C	10.1	9.8	10.52	10.5	0.464989	0.659911
	YDR148C	10.6	10.1	11.9	11.62	1.26217	1.48244
	YDR151C	8.3	8.8	9.26	9.54	0.948447	0.782914
	YDR153C	8.8	8.7	10.05	9.86	1.25931	1.1222
	YDR162C	7	7.3	7.97	8.32	1.01497	1.06993
	YDR164C	9	9	8.29	8.28	-0.747498	-0.720484
	YDR166C	9.5	9.6	9.16	9.25	-0.321336	-0.356493
	YDR169C	8.6	8.8	9.06	9.09	0.447357	0.280041
	YDR170C	13	12.5	12.22	11.83	-0.747369	-0.683826
	YDR173C	7.7	7.8	7.31	7.84	-0.360252	0.055004
	YDR175C	8.1	8	9.35	9.44	1.22088	1.41929
	YDR179C	5.8	5.9	6.23	6.37	0.473928	0.519654
	YDR181C	7.7	7.9	7.02	6.98	-0.6938	-0.869303
	YDR185C	5.2	5	6.5	6.37	1.27009	1.32893
	YDR186C	10.1	10.5	9.52	9.83	-0.566435	-0.653974
	YDR190C	10.7	10.5	10.96	10.93	0.283043	0.443231
	YDR192C	8.1	8.5	9.52	9.82	1.40054	1.36206
	YDR194C	10.6	10.5	9.92	9.63	-0.716073	-0.860887
	YDR196C	8.1	7.8	8.15	8.03	0.088701	0.241664
	YDR198C	7.4	7.7	6.78	7.16	-0.614449	-0.538166
	YDR200C	8.7	8.8	8.21	8.13	-0.503093	-0.712667
	YDR202C	8.2	8.3	7.81	8.3	-0.432323	-0.011948
	YDR207C	8.6	8.8	9.43	9.44	0.846351	0.673434
	YDR217C	9.4	9.4	8.89	8.91	-0.552872	-0.509069
	YDR218C	2.9	5.9	3.32	6.88	0.389868	0.988557
	YDR219C	8.2	8.4	8.47	8.44	0.291746	0.026318
	YDR224C	11.3	11.2	13.19	13.05	1.91456	1.81303
	YDR228C	8.2	8.7	8.88	9.22	0.641776	0.521686
	YDR231C	8.2	8.6	8.48	8.98	0.276585	0.364466
	YDR233C	11.5	11.2	12.82	12.56	1.28482	1.36594
	YDR236C	7.7	7.5	7.84	7.86	0.189501	0.314863
	YDR238C	12.2	11.7	12.16	11.77	-0.048407	0.0696
	YDR239C	8.5	8.8	8.73	8.92	0.259434	0.14438
	YDR240C	7.8	8	7.57	7.69	-0.220825	-0.349884
	YDR243C	7.9	8.3	7.58	8.03	-0.302456	-0.294932
	YDR248C	7.8	7.3	8.19	7.76	0.43826	0.50525
	YDR249C	6.5	6.8	5.46	5.56	-1.05076	-1.27114
	YDR255C	7.6	7.9	6.76	6.98	-0.819359	-0.953373
	YDR256C	3.8	4.4	0.95	-0.22	-2.83933	-4.59742
	YDR257C	8.7	8.4	8.16	8.03	-0.501045	-0.420129
	YDR258C	11.4	12.4	11.92	13.11	0.513924	0.722542
	YDR259C	5.7	6.2	5.87	5.77	0.181779	-0.428044
	YDR260C	7	6.4	7.83	7.41	0.862707	0.9688
	YDR261C	9.9	10.2	9.85	10.24	-0.090252	0.047956
	YDR263C	7	6.9	4.36	5.34	-2.65884	-1.54805
	YDR264C	11.1	11.2	10.24	10.39	-0.814874	-0.769595
	YDR266C	9.8	9.7	10.33	10.03	0.510339	0.305678
	YDR267C	7.7	7.1	7.51	6.79	-0.150773	-0.353599
	YDR276C	9.3	9.1	12.06	11.9	2.72574	2.77229
	YDR277C	7.5	8	7.82	8.61	0.283299	0.614279
	YDR282C	6.8	6.7	6.19	6.21	-0.64835	-0.525863
	YDR283C	10.7	10.7	8.91	9.09	-1.80359	-1.61352
	YDR284C	9	9.1	9.48	9.74	0.528284	0.637051
	YDR286C	6.5	6.6	6.79	6.75	0.307022	0.15143
	YDR289C	7.9	7.7	8.6	8.04	0.653428	0.344476
	YDR292C	9.9	9.5	9.75	9.29	-0.125548	-0.256092
	YDR293C	12.1	12.3	11.66	12	-0.426643	-0.283661
	YDR294C	10.4	10.7	10.23	10.64	-0.212725	-0.023439
	YDR295C	8.5	8.8	8.34	8.59	-0.142159	-0.229931
	YDR298C	10.2	9.5	11.19	10.84	0.971562	1.32435
	YDR300C	9.5	9.4	9.47	9.36	-0.035193	-0.009296
	YDR303C	9.9	10.1	9.65	9.72	-0.27058	-0.421182
	YDR304C	10.6	10.4	11.76	11.64	1.20646	1.21839
	YDR305C	7	6.9	7.76	7.34	0.75708	0.399286
	YDR306C	8.2	8.6	7.38	7.87	-0.779946	-0.740926
	YDR308C	6.4	6.1	7.99	8.01	1.54169	1.88594
	YDR309C	9.4	9.2	11.31	11.01	1.8623	1.7831
	YDR310C	10.4	10.4	9.4	9.74	-0.947886	-0.647505
	YDR313C	7.5	7.6	7.03	7.31	-0.504909	-0.250967
	YDR314C	8	8.2	4.92	5.29	-3.03983	-2.91665
	YDR315C	7	7.2	5.8	6	-1.22602	-1.15705
	YDR319C	6.8	7.3	6.68	6.72	-0.126731	-0.534595
	YDR320C	8.6	8.8	9.68	9.71	1.09123	0.943427
	YDR320C-A	6.7	6.8	7.59	7.28	0.891507	0.442978
	YDR322C-A	7.7	7.5	8.9	9.06	1.23808	1.59465
	YDR323C	6.9	7.7	6.72	6.98	-0.170851	-0.697249
	YDR324C	9.8	9.9	9.72	9.73	-0.122155	-0.210991
	YDR326C	10.8	11	10.13	10.02	-0.712529	-1.02654
	YDR328C	9.7	9.3	11.12	10.83	1.37431	1.50473
	YDR329C	8.7	8.8	7.83	7.97	-0.862679	-0.840133
	YDR333C	9.7	9.7	9.2	9.44	-0.458343	-0.248527
	YDR338C	8.1	8.2	7.73	7.69	-0.396083	-0.517328
	YDR339C	8	8.2	9.02	9.08	0.98819	0.871155
	YDR341C	12.2	11.7	12.85	12.45	0.606067	0.756919
	YDR342C	12.1	13	12.81	14.01	0.691748	0.979709
	YDR343C	12	12.9	12.78	13.99	0.739277	1.04591
	YDR345C	12.9	12.5	13.26	13.36	0.405767	0.896269
	YDR346C	10.8	10.3	10.58	10.21	-0.260094	-0.093211
	YDR348C	8.8	8.7	10.21	10.05	1.37661	1.37808
	YDR349C	9.6	9.7	8.73	8.95	-0.895874	-0.758407
	YDR350C	8.3	8.6	6.75	6.89	-1.55274	-1.70196
	YDR357C	7.8	7.7	7.43	7.42	-0.397354	-0.297009
	YDR359C	9.5	9.5	8.15	7.94	-1.32544	-1.56769
	YDR361C	9.1	9	9.45	9.22	0.34714	0.192998
	YDR362C	8.4	8.4	7.67	7.8	-0.736	-0.570845
	YDR364C	8	8.2	7.24	7.16	-0.783282	-1.07769
	YDR365C	10	9.7	10	9.64	-0.03586	-0.018897
	YDR366C	7.9	8.1	3.61	3.98	-4.32132	-4.10806
	YDR369C	7.9	8.1	7.39	7.71	-0.55758	-0.427329
	YDR370C	7.8	7.8	6.88	7.09	-0.879819	-0.705629
	YDR372C	9.9	9.5	9.8	9.71	-0.139158	0.219682
	YDR375C	8.4	8.1	7.9	7.49	-0.526269	-0.654916
	YDR378C	9	8.6	9.29	9.1	0.328007	0.477862
	YDR379C-A	5.2	6	7.04	6.89	1.79679	0.883665
	YDR381C-A	5.8	6	6.52	6.96	0.691252	0.938248
	YDR383C	6.3	6.2	6.63	6.22	0.349195	-0.005372
	YDR384C	8.9	8.4	9.79	9.11	0.910347	0.717906
	YDR387C	8.2	8.3	6.66	6.78	-1.49064	-1.54951
	YDR390C	9.3	9.5	8.93	9.29	-0.405467	-0.184911
	YDR391C	7.7	7	8.02	7.3	0.324637	0.346283
	YDR397C	8.6	8.3	8.67	8.3	0.092623	-0.021445
	YDR402C	3.4	5	1.32	1.78	-2.08668	-3.19197
	YDR404C	8.3	8	8.77	8.69	0.444225	0.691821
	YDR407C	10.2	10.5	8.58	9.14	-1.64791	-1.34034
	YDR408C	9.8	8.6	10.21	9.19	0.451685	0.603676
	YDR410C	8.4	8.4	8.18	8.34	-0.169973	-0.03152
	YDR411C	8.9	8.9	9.25	9.37	0.349104	0.465231
	YDR414C	7.7	7.7	7.46	7.03	-0.26857	-0.695728
	YDR415C	8.4	8.6	8.26	8.46	-0.107498	-0.096258
	YDR422C	9.7	9.9	9.45	9.59	-0.203145	-0.264455
	YDR423C	8.5	8.7	8.39	8.87	-0.061463	0.176945
	YDR424C	7.5	7	8.84	8.35	1.38531	1.39142
	YDR428C	8.2	7.8	8.01	7.92	-0.152167	0.136381
	YDR429C	10.3	9.4	11.72	10.94	1.42679	1.54282
	YDR430C	10.3	10.5	9.57	10.08	-0.720324	-0.450349
	YDR435C	7.7	8	7.41	7.92	-0.299104	-0.038369
	YDR441C	7.5	7.8	7.42	8.08	-0.118864	0.303248
	YDR443C	9.8	10	7.94	8.24	-1.87947	-1.72296
	YDR445C	22.7	23.2	10.73	11.18	-12.0144	-11.9775
	YDR447C	13.1	12.6	14.2	13.85	1.10889	1.22298
	YDR449C	8.6	8.8	8.51	8.59	-0.040944	-0.244074
	YDR451C	8.9	9.1	10.25	10.58	1.36352	1.43908
	YDR453C	6.8	7.5	7.99	8.92	1.17398	1.38554
	YDR454C	11.1	10.8	12.16	12	1.06804	1.16127
	YDR458C	9	8.9	8.54	8.33	-0.482541	-0.518422
	YDR459C	7.7	7.9	5.49	5.47	-2.25511	-2.40974
	YDR461C-A	6.9	7.8	8.78	9.71	1.86906	1.91387
	YDR465C	8.6	8.4	8.75	8.68	0.150713	0.274072
	YDR468C	7.7	7.7	8.76	8.81	1.06769	1.14283
	YDR470C	8.5	8.4	8.51	9.07	0.022162	0.674957
	YDR473C	7.3	7.2	7.61	7.42	0.26494	0.255263
	YDR475C	9.4	9.5	8.1	8.34	-1.29595	-1.15459
	YDR476C	8.2	8.7	9.01	9.33	0.784574	0.670072
	YDR479C	8.4	8.4	7.79	7.6	-0.614986	-0.850516
	YDR481C	10.2	10.4	9.86	10.48	-0.298626	0.058007
	YDR482C	6.5	6.3	7.1	7.25	0.644338	0.902453
	YDR485C	8.2	8.5	8.35	8.52	0.161117	-0.013692
	YDR486C	7.9	7.5	9.43	8.94	1.52305	1.45245
	YDR487C	9.9	10.2	10.72	11.09	0.776103	0.859806
	YDR488C	8	7.9	7.11	7.3	-0.886364	-0.56406
	YDR490C	9.3	9.7	8.93	9.29	-0.403051	-0.41116
	YDR495C	8.6	9	7.82	7.99	-0.773398	-1.0169
	YDR496C	9.9	9.8	10.29	10.1	0.374976	0.265781
	YDR497C	13.2	12.7	12.9	12.64	-0.309864	-0.06171
	YDR498C	7.7	7.6	8.05	7.89	0.304747	0.298064
	YDR500C	12	11.4	13.67	12.9	1.69579	1.54136
	YDR502C	12	11	13.01	12.08	0.983139	1.06086
	YDR503C	7.9	7.7	7.66	7.72	-0.276036	0.023539
	YDR504C	6.4	7.3	1.96	1.58	-4.45015	-5.74041
	YDR505C	10.4	10.7	10.31	10.42	-0.0575	-0.260522
	YDR506C	8	7.9	7.29	7.56	-0.706237	-0.352442
	YDR507C	10.4	10.4	10.52	10.11	0.084811	-0.260984
	YDR508C	12.1	12	11.94	12.11	-0.118383	0.07942
	YDR512C	8.2	8.4	9.15	9.21	0.93447	0.805735
	YDR514C	7.7	7.9	7.83	8.01	0.100685	0.156787
	YDR516C	10.5	10.8	11.1	11.41	0.591888	0.638195
	YDR520C	8	8.3	7.15	7.55	-0.801818	-0.740203
	YDR523C	4.6	5.5	2.23	4.5	-2.34365	-0.971295
	YDR524C	8.6	8.6	7.84	7.64	-0.794988	-0.954389
	YDR524C-B	12.6	12.1	15.2	14.98	2.56784	2.88951
	YDR529C	9	8.8	10.91	10.98	1.94662	2.186
	YDR530C	7.4	7.2	7.47	6.3	0.062434	-0.938204
	YDR532C	6.9	7	6.48	6.4	-0.446317	-0.593809
	YDR533C	9	9.3	10.2	10.59	1.16936	1.31192
	YDR534C	6.4	6.5	2.85	6.37	-3.55231	-0.103079
	YDR535C	4.8	4.4	0.46	-4.99	-4.28834	-9.40148
	YDR540C	5.1	6	5.68	6.7	0.577329	0.728588
	YDR541C	7.4	6.7	6.16	6.21	-1.28851	-0.526884
	YDL248W	9.8	8.5	10.83	9.57	1.01177	1.06707
	YDL244W	5.8	6.8	5.93	6.95	0.085271	0.1212
	YDL241W	4.8	4.3	6.34	6.52	1.55698	2.25189
	YDL240W	9.4	9.2	8.26	7.95	-1.15489	-1.21602
	YDL237W	9.8	9.4	9.68	9.41	-0.153146	0.03149
	YDL236W	9.7	9.6	10.38	10.37	0.683414	0.782445
	YDL233W	7.7	8.3	8.05	8.91	0.315019	0.614355
	YDL232W	6.4	6.6	8.4	8.4	2.00356	1.81651
	YDL230W	7.9	8.3	7.89	8.43	-0.028204	0.089307
	YDL229W	16.1	15.2	16.22	15.6	0.152311	0.424037
	YDL225W	9.4	9.3	10.01	9.79	0.592404	0.519289
	YDL219W	8.4	8.6	8.59	8.86	0.219989	0.274458
	YDL218W	4	4.6	2.24	2.11	-1.80908	-2.47804
	YDL212W	10	9.6	10.57	10.43	0.552425	0.838912
	YDL210W	5.3	5.3	4.19	4.61	-1.10805	-0.738917
	YDL208W	10	9.4	11.36	10.82	1.38809	1.38576
	YDL207W	8.2	8.6	8.33	8.23	0.085589	-0.358755
	YDL206W	8.2	8.5	6	6.11	-2.23631	-2.40242
	YDL204W	7.2	8.1	7.47	8.71	0.2513	0.605127
	YDL202W	7.8	7.8	8.43	8.37	0.668727	0.530396
	YDL201W	8.8	8.2	9.51	9.05	0.697572	0.881327
	YDL195W	12.7	12.5	12.94	13.16	0.283614	0.696303
	YDL194W	7.8	8.1	5.93	6.42	-1.90435	-1.67161
	YDL193W	9.2	9	9.81	9.83	0.626136	0.791733
	YDL192W	12.4	12	12.73	12.59	0.28629	0.574334
	YDL191W	13.4	13	14.47	13.99	1.08585	0.997579
	YDL189W	8.7	8.6	8.9	8.87	0.203556	0.227248
	YDL185W	14.7	14.2	15	14.76	0.331828	0.554121
	YDL182W	11.2	11.7	11.77	12.42	0.612377	0.685505
	YDL181W	7.4	7.7	9.11	9.77	1.71207	2.0639
	YDL180W	8.6	8.6	7.72	7.89	-0.865886	-0.660455
	YDL179W	7.9	8.1	8.12	8.45	0.181253	0.397631
	YDL178W	9.8	9.1	9.61	8.96	-0.166835	-0.185264
	YDL176W	8.3	8.3	6.83	6.87	-1.43624	-1.39157
	YDL173W	9.2	8.9	10.07	9.95	0.841288	1.08038
	YDL170W	8.1	8.5	7.45	8.07	-0.690913	-0.421555
	YDL168W	9.9	10.2	10.98	11.6	1.03295	1.34587
	YDL165W	7.7	7.7	9.38	9.34	1.70277	1.66981
	YDL161W	8.6	8.4	9.95	9.72	1.30822	1.30075
	YDL159W	7.8	7.9	7.86	7.95	0.03222	0.099041
	YDL156W	7.8	8	7.41	7.64	-0.385377	-0.363015
	YDL155W	9	9.1	8.3	8.52	-0.7236	-0.601754
	YDL154W	7.3	8.2	2.91	-1.22	-4.42541	-9.39081
	YDL150W	8.4	8.5	9.13	9.23	0.73959	0.734107
	YDL149W	8.5	8.8	7.71	8.09	-0.82636	-0.739985
	YDL147W	10.6	10	11.47	10.93	0.904278	0.90925
	YDL146W	8.5	8.8	7.21	7.53	-1.2992	-1.22902
	YDL143W	11.4	11.3	11.68	11.79	0.229238	0.486523
	YDL141W	10	9.6	9.31	9.13	-0.667587	-0.514286
	YDL138W	8.6	8.9	6.1	6.58	-2.52438	-2.32793
	YDL137W	11.2	10.6	11.63	11.24	0.388832	0.61547
	YDL136W	13.3	12.9	14.44	13.95	1.13219	1.04233
	YDL133W	8.3	8.4	7.46	7.37	-0.84804	-0.99809
	YDL132W	10.5	10.8	10	10.45	-0.497789	-0.332992
	YDL131W	11.3	11.8	12.11	12.7	0.783739	0.903016
	YDL130W-A	7.5	7.6	9.25	9.63	1.79454	1.98272
	YDL130W	12.1	11.3	13.98	13.43	1.92828	2.14432
	YDL129W	5.4	5.7	5.54	5.79	0.095649	0.048584
	YDL128W	9.9	9.5	10.64	10.42	0.716557	0.873923
	YDL127W	7.3	7.4	8.05	8.05	0.771114	0.613856
	YDL124W	11.4	11.8	12.05	12.63	0.632755	0.807074
	YDL123W	6.8	7.3	7.69	8.49	0.891743	1.14284
	YDL122W	10.2	10.1	9.56	9.6	-0.617851	-0.50757
	YDL120W	8.6	8.4	9.01	9.11	0.364529	0.70543
	YDL117W	9.6	9.8	8.89	9.14	-0.703684	-0.619992
	YDL116W	10	9.9	9.15	9.1	-0.840665	-0.803217
	YDL112W	11	10.8	9.9	10	-1.09112	-0.811742
	YDL108W	7.6	7.5	7.79	7.69	0.205859	0.141681
	YDL107W	6.7	7	6.73	6.96	-0.01122	-0.065445
	YDL105W	6.5	6.7	6.43	6.32	-0.049695	-0.346701
	YDL102W	9.8	10	9.56	9.65	-0.286431	-0.31039
	YDL099W	8.8	8.4	9.7	9.35	0.94804	0.967377
	YDL095W	12.2	12	12.16	11.98	-0.019374	0.014552
	YDL093W	9.5	9.4	9.08	9.24	-0.422759	-0.201695
	YDL092W	8	8	9.37	9.13	1.36626	1.16978
	YDL089W	8.3	8.3	7.85	8.02	-0.500366	-0.315482
	YDL086W	9.9	10	10.58	10.72	0.638067	0.761878
	YDL085W	4.9	5.7	3.98	4.98	-0.887339	-0.691834
	YDL084W	13	12.3	13.82	13.31	0.865938	1.00547
	YDL082W	12.8	12.2	14.54	14.01	1.75238	1.83513
	YDL075W	12.5	11.9	14.28	13.81	1.74947	1.9411
	YDL073W	9.5	9.7	7.44	7.78	-2.06212	-1.97367
	YDL070W	10.3	10.4	10.13	9.88	-0.193798	-0.534225
	YDL066W	12.5	11.5	12.7	11.61	0.177013	0.06855
	YDL064W	8.6	8.6	10.18	10.06	1.58312	1.4775
	YDL060W	9.9	9.8	9.56	9.49	-0.334853	-0.265997
	YDL058W	11.1	10.9	9.92	9.84	-1.19509	-1.04397
	YDL057W	6.8	7.4	7.14	7.46	0.351793	0.053621
	YDL056W	8.9	9.1	8.87	8.69	0.023193	-0.38979
	YDL051W	10.2	10.3	11.15	11.25	0.954737	0.94224
	YDL046W	9.5	9.2	10.69	10.57	1.22277	1.32172
	YDL045W-A	7.5	7.6	8.55	8.83	1.08021	1.22679
	YDL031W	10.3	10	10.37	10.15	0.039068	0.175927
	YDL030W	7.4	7.4	7.29	7.19	-0.067968	-0.194866
	YDL029W	11	10.6	11.19	10.97	0.208688	0.421641
	YDL022W	12.1	12.5	13.63	14.33	1.51239	1.78383
	YDL021W	8.4	8.9	8.72	9.59	0.355902	0.710974
	YDL017W	7.2	8.1	7.22	7.95	0.064832	-0.154423
	YDL014W	11.6	11	13.02	12.62	1.38508	1.63971
	YDL013W	8.3	8.4	7.79	7.99	-0.458445	-0.445613
	YDL010W	7.5	7.2	8.49	8.5	1.00308	1.30384
	YDL008W	7	6.6	7.28	7.2	0.251916	0.651312
	YDL007W	10.9	10.8	11.48	11.28	0.598766	0.515146
	YDL006W	8	8.2	7.58	8.16	-0.441516	-0.024405
	YDL004W	9.6	9.2	11.5	11.14	1.87179	1.92313
	YDL003W	9.3	9.1	9.55	9.62	0.226665	0.525986
	YDL001W	8	7.9	7.94	7.83	-0.04055	-0.088193
	YDR002W	11.6	11.4	12.71	12.64	1.12611	1.24381
	YDR003W-A	5	5.2	-5.61	-4.99	-10.5682	-10.1403
	YDR004W	8.1	8	6.04	6.42	-2.03506	-1.61947
	YDR007W	8.4	8	8.7	7.97	0.255896	-0.030641
	YDR009W	6.2	6.6	5.51	6.22	-0.676295	-0.401818
	YDR011W	11.6	11.6	10.5	10.79	-1.08033	-0.838031
	YDR012W	14.8	14.2	16.28	15.73	1.44312	1.57992
	YDR013W	7.4	7.2	7.21	6.86	-0.152573	-0.365566
	YDR014W	7.3	7.5	6.7	6.88	-0.573496	-0.65268
	YDR014W-A	3.8	4.9	4.3	5.95	0.451747	1.07763
	YDR021W	6.7	7.3	7.19	7.65	0.459216	0.338918
	YDR023W	12.7	11.8	13.45	12.82	0.763758	1.00756
	YDR024W	5	4.5	2.79	3.1	-2.19931	-1.3821
	YDR025W	13	12.4	14.83	14.16	1.85963	1.74753
	YDR031W	7.1	7.1	7.68	7.6	0.622282	0.506923
	YDR033W	13.8	13.5	14.74	14.5	0.900993	1.04455
	YDR034W-B	2.5	4.9	5.09	7.8	2.61844	2.92707
	YDR035W	10.3	9.9	11.4	11.21	1.05403	1.35722
	YDR037W	13.1	12.5	13.84	13.36	0.73776	0.836628
	YDR041W	8.1	8	8.72	8.4	0.585985	0.441061
	YDR044W	9.3	9.3	10.22	10.53	0.8867	1.27556
	YDR047W	9.7	9.3	9.65	9.1	-0.006464	-0.200414
	YDR049W	8.7	8.7	8.58	8.5	-0.079279	-0.158561
	YDR055W	10.9	11.9	11.98	13.24	1.07272	1.36046
	YDR057W	8.2	8.3	7.87	8.05	-0.313873	-0.255175
	YDR060W	10.9	10.8	10.88	10.7	-0.067318	-0.127812
	YDR061W	8.9	8.8	8.44	8.52	-0.467624	-0.269016
	YDR062W	11	10.7	10.86	11.03	-0.097118	0.322445
	YDR063W	7.9	7.7	9.44	9.17	1.5277	1.49186
	YDR064W	14	13.3	15.28	14.69	1.28705	1.38157
	YDR065W	6.9	7.1	5.58	6	-1.28883	-1.13217
	YDR068W	8.2	7.5	8.57	7.95	0.379776	0.483226
	YDR073W	7.8	8.1	7.79	7.58	0.015224	-0.533591
	YDR074W	12.2	12.5	12.16	12.58	-0.020138	0.103984
	YDR075W	7.3	7.4	7.12	7.9	-0.227298	0.466609
	YDR076W	6.5	6.5	5.16	5.25	-1.34714	-1.27191
	YDR077W	13.7	14	17.24	17.23	3.51952	3.19928
	YDR079W	6.3	6.7	7.81	8.07	1.52571	1.33894
	YDR080W	9	9.3	8.43	8.78	-0.5597	-0.525751
	YDR082W	7.7	8.3	3.24	4.54	-4.45266	-3.80049
	YDR083W	8.1	7.6	8.6	7.89	0.54577	0.325905
	YDR089W	10.4	9.8	9.85	9.46	-0.505848	-0.344756
	YDR092W	8.2	8.2	10.38	10.42	2.15851	2.19887
	YDR093W	11.3	11.1	9.73	9.5	-1.58036	-1.58447
	YDR096W	9.6	9.7	9.66	9.72	0.062891	0.027143
	YDR099W	11.5	11.3	13.29	12.93	1.75198	1.64949
	YDR100W	8.3	8.6	9.95	10.4	1.62765	1.82664
	YDR103W	9.3	9.6	9.21	9.57	-0.137456	-0.055424
	YDR106W	4.8	3.9	4.57	3.86	-0.187414	-0.083462
	YDR108W	8.4	8.5	7.41	7.88	-1.00897	-0.602944
	YDR110W	8.3	8.4	7.83	7.93	-0.472335	-0.44632
	YDR115W	7.4	7.5	8.8	8.75	1.38223	1.23479
	YDR118W	8.1	8	7.19	7.15	-0.867892	-0.88198
	YDR119W	11.1	10.8	10.64	10.46	-0.450206	-0.302288
	YDR119W-A	4.8	6.1	6.57	8.14	1.74754	2.03552
	YDR121W	7.4	7.5	8.45	8.78	1.08304	1.24575
	YDR122W	10.5	10.6	9.7	9.92	-0.81729	-0.692991
	YDR124W	5.6	5.5	3.76	3.58	-1.82371	-1.8758
	YDR126W	5.9	6.1	5.9	6.25	0.024083	0.123443
	YDR127W	13.2	12.6	12.8	12.3	-0.366999	-0.315426
	YDR128W	10.1	9.9	7.67	7.67	-2.39845	-2.24819
	YDR137W	8.6	8.7	7.6	7.56	-1.04984	-1.15306
	YDR138W	8.8	8.8	8.21	8.29	-0.570756	-0.554452
	YDR140W	7.2	7.5	7.47	7.53	0.240912	0.045525
	YDR145W	9.1	8.9	10	9.52	0.883214	0.641295
	YDR147W	8.8	8.8	8.25	8.38	-0.545497	-0.431365
	YDR150W	13.1	13	12.05	12.05	-1.00313	-0.97676
	YDR152W	8.6	8.3	9.04	8.68	0.434987	0.388819
	YDR158W	12.4	12.1	13.04	12.89	0.613355	0.784047
	YDR159W	9.5	9.8	8.11	8.05	-1.42072	-1.71313
	YDR160W	8.2	8.3	6.02	6.08	-2.17861	-2.25016
	YDR161W	9	8.9	9.35	9.26	0.319299	0.36397
	YDR163W	6.1	6.1	7.55	7.42	1.47997	1.31447
	YDR165W	9.5	9.5	9.68	9.55	0.136094	0.091421
	YDR167W	8	8	9.13	9.1	1.14632	1.05169
	YDR168W	10.4	10.3	11.36	11.56	0.934004	1.28628
	YDR171W	10.2	10.7	11.12	11.62	0.901149	0.88399
	YDR172W	11.8	11.8	13.08	13.16	1.31521	1.34849
	YDR174W	10.5	10.6	11.45	11.79	0.900889	1.14889
	YDR176W	9.2	9.2	8.84	8.76	-0.316262	-0.400742
	YDR177W	9.4	9.6	10.86	11.04	1.4444	1.43714
	YDR178W	8.7	8.3	10.09	9.94	1.37391	1.60996
	YDR179W-A	7.3	7.8	5.94	6.68	-1.37847	-1.09274
	YDR180W	9.5	9.7	8.55	8.88	-0.91156	-0.831415
	YDR182W	9.5	9.2	9.24	9.12	-0.216687	-0.126193
	YDR183W	6.8	7.3	6.87	7.04	0.092407	-0.240037
	YDR188W	11.9	11.8	11.83	12.04	-0.0235	0.235323
	YDR189W	10	9.8	10.15	9.89	0.136291	0.135598
	YDR191W	6.7	7.1	7.2	7.68	0.509413	0.62371
	YDR195W	8	7.9	8.74	8.87	0.741265	0.999896
	YDR197W	7.9	8.2	7.23	7.66	-0.681296	-0.553279
	YDR201W	6.9	6.7	7.46	7.36	0.576745	0.705916
	YDR204W	8.7	9.1	8.86	9.25	0.162036	0.144037
	YDR205W	9	9.1	8.54	8.88	-0.435962	-0.222148
	YDR206W	10.1	10.1	8.57	8.6	-1.49788	-1.54757
	YDR208W	9.9	10.2	9.62	9.76	-0.310762	-0.467516
	YDR210W	8.4	8.7	10.32	10.68	1.93739	2.02452
	YDR211W	11	11.1	10.53	10.76	-0.486333	-0.375167
	YDR212W	11.8	11.7	11.84	12.02	0.07776	0.373955
	YDR213W	8.9	9.4	8.6	9.39	-0.279498	-0.032127
	YDR214W	10.7	11.5	11.85	12.79	1.19694	1.24423
	YDR216W	9.9	10.8	8.8	10.19	-1.07682	-0.641154
	YDR221W	9.4	9.5	8.52	8.68	-0.880771	-0.833003
	YDR222W	8.4	8.6	8.43	8.68	0.051511	0.084746
	YDR223W	5.5	6.6	3.68	3.59	-1.79705	-2.99936
	YDR225W	11.9	11.9	13.03	13.27	1.13033	1.36529
	YDR226W	12.4	12.2	14	13.87	1.58733	1.64276
	YDR227W	9.6	9.7	8.95	8.95	-0.614813	-0.771459
	YDR229W	8.2	8.3	8.61	8.75	0.404424	0.468591
	YDR232W	10.9	10.6	10.95	10.89	0.090712	0.330344
	YDR234W	10.1	10.2	9.98	10.54	-0.172264	0.36124
	YDR235W	8.3	8.3	7.66	7.69	-0.624818	-0.653131
	YDR237W	8.2	8.1	9.01	8.78	0.853598	0.727564
	YDR241W	4.5	5	2.55	1.77	-1.93945	-3.1862
	YDR242W	7.1	6.7	4.01	4.27	-3.0455	-2.46974
	YDR244W	8.8	8.7	9.03	9.15	0.274619	0.425456
	YDR245W	9.8	9.4	9.06	8.77	-0.712337	-0.629683
	YDR246W	7.5	7.5	8.05	8.13	0.566425	0.594176
	YDR247W	8	8	7.25	7.19	-0.759005	-0.785704
	YDR251W	10.4	10.1	9.46	9.38	-0.919442	-0.671751
	YDR252W	5.9	5.8	7.09	7.24	1.15583	1.45094
	YDR254W	7.5	7	6.25	5.99	-1.27971	-1.04574
	YDR262W	8	8.3	8.64	8.86	0.594061	0.575562
	YDR265W	7.2	7.6	6.33	6.58	-0.853706	-1.0518
	YDR268W	8.1	8	7.92	8.28	-0.137167	0.28345
	YDR270W	8.9	9.5	7.66	8.61	-1.22954	-0.904479
	YDR272W	9.5	9.6	10.47	10.46	1.00771	0.898416
	YDR273W	5.7	6.5	4.97	6.45	-0.771622	-0.082875
	YDR275W	8	8	5.68	5.22	-2.31901	-2.77085
	YDR279W	7.7	7.4	7.8	7.37	0.129503	0.005555
	YDR280W	8.1	8.2	8.4	8.48	0.251366	0.291803
	YDR285W	6.3	6.6	5.07	6.03	-1.24325	-0.598376
	YDR287W	7.7	7.7	7.85	7.92	0.112755	0.254062
	YDR288W	7.9	7.8	7	7.05	-0.905536	-0.771971
	YDR291W	9.4	9.3	7.28	7.72	-2.09895	-1.59541
	YDR296W	8.3	8.4	9.08	8.99	0.765564	0.625394
	YDR297W	9.8	10	10.08	10.36	0.23648	0.359331
	YDR299W	8.6	8.6	9.48	9.52	0.888848	0.964312
	YDR301W	10	10.2	8.77	8.96	-1.26673	-1.2824
	YDR302W	7.5	7.8	8.7	8.78	1.21116	1.017
	YDR307W	9.2	9.2	9.29	9.18	0.082293	-0.012081
	YDR311W	9	9.3	9.07	9.3	0.121938	-0.045415
	YDR312W	8.3	8.2	8.69	8.55	0.414087	0.367499
	YDR316W	7.7	7.8	6.91	6.99	-0.805738	-0.77406
	YDR317W	6	6.6	5.26	6.26	-0.736018	-0.306824
	YDR318W	6.9	6.7	6.16	5.49	-0.752403	-1.25363
	YDR321W	11.1	10.8	11.87	11.72	0.736184	0.888888
	YDR322W	8.4	8.3	9.23	9.05	0.850197	0.72162
	YDR325W	9.5	9.4	7.95	7.88	-1.52591	-1.5227
	YDR330W	8.6	9	9.42	9.71	0.768368	0.756684
	YDR331W	9.1	8.9	8.78	8.77	-0.343946	-0.092935
	YDR332W	7.9	8.4	5.06	5.64	-2.79931	-2.7634
	YDR334W	10.5	10.6	7.6	7.69	-2.88926	-2.88485
	YDR335W	11.3	11.6	9.79	10.37	-1.47842	-1.19422
	YDR336W	7.1	7.2	6.03	5.74	-1.11199	-1.42846
	YDR337W	8	8	8.86	8.63	0.882042	0.590173
	YDR347W	9.3	9.5	9.06	9.24	-0.256664	-0.289026
	YDR351W	9.4	9.7	9.21	9.34	-0.18921	-0.349745
	YDR352W	8.2	8.2	8.51	8.99	0.268631	0.796059
	YDR353W	12	11.5	12.81	12.52	0.849205	1.05452
	YDR354W	9.2	8.7	9.55	9.64	0.397982	0.96921
	YDR356W	9.1	8.8	9.01	8.82	-0.123411	0.055364
	YDR358W	9	8.8	9.9	9.63	0.868264	0.782906
	YDR363W	7.8	7.8	7.25	7.21	-0.531095	-0.553785
	YDR363W-A	8.1	8.3	9.55	9.81	1.45995	1.56149
	YDR367W	8.4	8.1	8.44	8.4	0.024823	0.290455
	YDR368W	10.7	10.6	11.43	11.55	0.711573	0.944519
	YDR371W	8.2	8.6	7.25	7.7	-0.983355	-0.855446
	YDR374W-A	6.5	6.5	7.07	7.39	0.58987	0.836827
	YDR376W	8.7	8.9	8.15	8.56	-0.578788	-0.369374
	YDR377W	9.5	9.5	10.76	10.87	1.21942	1.32424
	YDR379W	9.1	9	8.95	8.61	-0.125455	-0.380123
	YDR380W	6.1	8.9	6.13	9.15	0.063075	0.296993
	YDR381W	11.2	10.8	12.41	12.09	1.20094	1.25943
	YDR382W	12.8	11.8	14.03	13.22	1.24576	1.40457
	YDR385W	16.8	16.1	16.87	16.27	0.03415	0.20616
	YDR386W	7.6	7.8	6.86	6.9	-0.762143	-0.904957
	YDR388W	11.5	11.1	12.01	12.01	0.556868	0.887988
	YDR389W	9.5	9.8	9.14	9.17	-0.400304	-0.644514
	YDR392W	7.7	7.5	7.52	7.55	-0.167357	0.050913
	YDR393W	7.8	8	6.88	6.92	-0.917302	-1.04821
	YDR394W	10.4	10.7	11.19	11.63	0.749902	0.968075
	YDR395W	11.3	11.3	11.25	11.56	-0.02995	0.285475
	YDR398W	9.3	9.4	9.56	9.75	0.23388	0.32278
	YDR399W	10.2	9.2	11.03	9.72	0.872278	0.533174
	YDR403W	6.2	6	5.17	4.45	-1.0783	-1.53733
	YDR405W	7.5	7.8	8.92	9.08	1.37584	1.32781
	YDR406W	10.2	10.8	8.93	9.51	-1.31754	-1.25896
	YDR409W	8.8	9.2	8.05	8.56	-0.743889	-0.619256
	YDR412W	7.7	7.4	8.49	8.18	0.796697	0.799936
	YDR416W	8.7	9	7.46	8.04	-1.265	-0.921476
	YDR418W	13.4	12.7	14.78	14.15	1.41831	1.42087
	YDR419W	7.9	8	6.77	6.55	-1.12054	-1.47917
	YDR420W	10.6	10.9	10.27	10.29	-0.338817	-0.588915
	YDR421W	8.8	9.1	7.5	7.78	-1.33071	-1.36379
	YDR425W	7.8	8.1	8.03	8.4	0.263615	0.274374
	YDR427W	10	10	10.97	11.02	0.940865	0.984321
	YDR434W	9.6	9.6	9.48	9.59	-0.100056	-0.043924
	YDR436W	8.4	8.7	8.54	8.61	0.093793	-0.058184
	YDR438W	6.7	6.7	1.32	0.36	-5.32941	-6.38346
	YDR439W	7.3	7.5	6.88	7.25	-0.425158	-0.262577
	YDR440W	8.2	8.1	7.54	7.63	-0.691781	-0.516005
	YDR444W	8.4	8.3	6.62	6.67	-1.73946	-1.63777
	YDR448W	8.2	8.1	8.18	8.1	-0.052379	-0.023585
	YDR450W	13.3	12.7	14.48	13.63	1.20456	0.975168
	YDR452W	10.7	10.3	9.57	9.48	-1.09327	-0.867056
	YDR456W	10.1	9.9	9.65	9.54	-0.415873	-0.310792
	YDR457W	12.8	12.8	10.66	10.97	-2.17989	-1.81514
	YDR460W	7.6	8	8.24	8.38	0.662584	0.398063
	YDR461W	8	6.2	10.26	8.13	2.21329	1.97464
	YDR462W	7.4	7.6	9.28	9.38	1.83487	1.74819
	YDR463W	9.4	9.5	10.55	10.61	1.14863	1.08703
	YDR464W	9.7	9.9	9.06	9.29	-0.60728	-0.582435
	YDR466W	9	9.2	8.26	8.29	-0.785432	-0.900958
	YDR469W	7.3	7	7.9	7.84	0.641205	0.840323
	YDR471W	11.8	11.2	13.08	12.35	1.257	1.15407
	YDR472W	7.8	7.8	8.52	8.77	0.684522	0.940098
	YDR477W	10	9.8	10.45	10.31	0.42382	0.511549
	YDR478W	6	6.4	6.72	7.09	0.738796	0.693808
	YDR483W	11.7	11.4	11.56	11.21	-0.130963	-0.171602
	YDR484W	8.3	8.3	8.03	8.34	-0.301292	0.020793
	YDR489W	6.9	7.6	7.68	8.05	0.759065	0.476247
	YDR492W	8.2	8.6	8.7	9.05	0.485698	0.417987
	YDR493W	6.7	7.1	8.12	8.57	1.37935	1.49724
	YDR494W	8.4	8	8.85	8.77	0.459683	0.732126
	YDR499W	8.2	8.6	7.12	7.4	-1.12745	-1.18817
	YDR501W	6.7	7.1	7.58	7.56	0.839269	0.446068
	YDR510W	10.4	10.1	11.56	11.5	1.21076	1.36075
	YDR511W	7.7	7.9	8.3	8.91	0.644241	1.05906
	YDR513W	9.9	9.8	11.11	11.33	1.24717	1.49212
	YDR515W	8	8.2	8.82	9.09	0.824148	0.848641
	YDR517W	9.7	10	9.91	10.15	0.186752	0.175604
	YDR518W	9.9	9.9	10.31	10.31	0.447089	0.454048
	YDR519W	8.9	8.6	9.48	9.53	0.560764	0.977658
	YDR525W-A	7.3	7.1	9.04	9.08	1.74491	1.93305
	YDR527W	8.4	8.8	8.87	9.12	0.426278	0.362058
	YDR528W	8.3	8.6	7.64	8.2	-0.626618	-0.403615
	YDR531W	9.2	9	8.77	8.83	-0.399778	-0.203422
	YDR538W	7	7.1	6.52	4.03	-0.524632	-3.10001
	YDR539W	9.2	8.6	9.19	8.67	-0.006835	0.06674
	YEL073C	7.2	6.5	8.15	7.06	0.932633	0.59333
	YEL068C	6.7	6.6	6.99	6.81	0.335185	0.194447
	YEL064C	7.5	7.4	7.02	6.64	-0.465349	-0.776271
	YEL063C	9.9	10	10.47	10.57	0.547782	0.617208
	YEL061C	9.6	9.5	8.28	8.48	-1.28357	-0.981862
	YEL060C	11.5	12.7	12.27	13.69	0.761803	0.966479
	YEL059C-A	5.1	5.6	7.11	7.19	2.01416	1.56786
	YEL057C	4.2	5.1	2.67	3.87	-1.53967	-1.27734
	YEL055C	10.9	10.6	10.29	10.01	-0.63243	-0.632807
	YEL054C	12.7	12.1	14.31	13.76	1.59967	1.63245
	YEL053C	8.8	8.6	7.62	7.27	-1.19551	-1.31104
	YEL050C	9.2	9.1	9.25	9.32	0.075158	0.239471
	YEL048C	6.5	6.7	6.61	6.86	0.125726	0.131797
	YEL047C	10.8	10.9	11.7	12.17	0.89592	1.25458
	YEL046C	11.7	11.5	12.5	12.31	0.75473	0.789397
	YEL039C	5.8	7.2	7.02	8.54	1.20775	1.38027
	YEL037C	10.3	10.1	12.1	11.91	1.77249	1.7793
	YEL036C	10	10	9.62	9.79	-0.355565	-0.168697
	YEL029C	8.2	8.2	7.62	7.91	-0.593797	-0.289089
	YEL025C	10.1	10.1	7.01	7.05	-3.09011	-3.0597
	YEL023C	7.5	7.5	0.96	1.59	-6.53413	-5.90615
	YEL017C-A	9.7	9.4	11.72	11.51	2.02068	2.10258
	YEL016C	8.7	8.6	6.57	6.4	-2.13498	-2.23501
	YEL009C	12.2	12.1	8.89	9.93	-3.28927	-2.13865
	YEL005C	6.8	6.7	6.28	6.03	-0.53857	-0.640211
	YEL002C	11	10.7	11.81	11.62	0.826583	0.930953
	YEL001C	10	9.8	10.7	10.8	0.659705	0.953669
	YER003C	11.8	11.5	12.94	12.74	1.1135	1.27184
	YER007C-A	9.3	9.1	10.46	10.35	1.17802	1.26258
	YER008C	10.3	10.4	9.71	9.7	-0.596305	-0.69797
	YER010C	8.1	8.3	8.68	8.86	0.58113	0.612498
	YER017C	10.2	10.2	9.27	9.31	-0.881568	-0.849301
	YER018C	7.9	7.7	8.04	7.96	0.177871	0.237589
	YER019C-A	9.4	9.3	10.82	10.55	1.38614	1.29659
	YER026C	11.6	11.2	12.06	11.79	0.476756	0.58857
	YER027C	9.6	9.4	10.99	10.9	1.34965	1.45886
	YER028C	6.5	6.9	6.69	6.92	0.154182	0.056184
	YER029C	7.4	7.2	7.76	7.94	0.31553	0.745593
	YER031C	10.2	9.9	10.34	10.09	0.121774	0.148494
	YER033C	8.9	9.5	8.15	8.75	-0.73009	-0.740801
	YER036C	12.4	12.1	12.34	12.38	-0.043887	0.267301
	YER038C	7	7	5.45	5.83	-1.54626	-1.17721
	YER039C	5.8	6.2	0.15	0.78	-5.6315	-5.41827
	YER043C	14.8	13.6	15.49	14.41	0.732843	0.858537
	YER044C	8.4	8.9	9.22	10.04	0.792553	1.10872
	YER044C-A	5.3	6.6	1.96	2.67	-3.3146	-3.9539
	YER045C	6.7	7.1	7.02	7.48	0.297738	0.410949
	YER047C	8.5	8.8	8.4	8.3	-0.149821	-0.50264
	YER048C	10.2	9.8	11.24	11.14	1.01521	1.37863
	YER050C	7.2	7.4	8.87	9.11	1.70679	1.73646
	YER052C	10.3	10.1	11.11	11.15	0.842787	1.05846
	YER053C	8.7	9	9.25	9.82	0.563564	0.861379
	YER053C-A	5.7	7.4	8.18	9.54	2.427	2.16265
	YER054C	7.4	8.5	6.51	8.28	-0.844423	-0.19036
	YER055C	11.4	10.6	11.32	10.83	-0.06539	0.248129
	YER056C	11.3	10.8	11.5	11.36	0.243045	0.524933
	YER056C-A	12.5	11.9	13.8	13.22	1.29913	1.29059
	YER057C	9.5	8.4	11.43	10.29	1.91876	1.86572
	YER061C	9.1	8.4	8.2	8.02	-0.853986	-0.328249
	YER062C	10.5	11.3	11.66	12.65	1.17126	1.29617
	YER064C	9.8	10.1	9.98	10.4	0.207728	0.265816
	YER065C	6.8	7.1	4.34	4.13	-2.45283	-3.00873
	YER071C	6.6	6.3	7.65	7.5	1.04833	1.21011
	YER075C	8.6	9.2	8.17	8.84	-0.451068	-0.350769
	YER076C	6.7	6.4	5.33	5.2	-1.32427	-1.23856
	YER077C	8.3	8.6	7.54	7.86	-0.785708	-0.770614
	YER078C	8.6	8	7.96	7.82	-0.605186	-0.212665
	YER082C	9	9	9.09	8.92	0.113083	-0.030592
	YER083C	9.1	9	10.62	10.61	1.52878	1.63124
	YER087C-B	8.8	8.7	9.68	9.62	0.831416	0.87355
	YER088C	10.5	10.7	11.3	11.38	0.827411	0.657126
	YER088C-A	6.5	5.9	5.27	4.75	-1.23867	-1.18532
	YER089C	10.8	10.1	10.61	10.24	-0.159739	0.099668
	YER091C	14.5	13.3	15.01	13.69	0.47651	0.38809
	YER093C	9.4	9.7	7.81	8.25	-1.54442	-1.47584
	YER093C-A	5.6	5.9	6.38	6.46	0.746838	0.514197
	YER094C	10.1	10.2	10.88	11.27	0.748728	1.02516
	YER099C	8.4	8.7	9.12	9.52	0.68399	0.798577
	YER101C	7.3	7.3	8.32	8.07	1.02505	0.78892
	YER105C	11.3	11.6	9.92	10.2	-1.39539	-1.44663
	YER107C	9.1	8.8	9.34	9.19	0.281585	0.354472
	YER109C	8.5	8.5	6.31	6.69	-2.17676	-1.78813
	YER110C	13.1	12.8	13.7	13.64	0.588518	0.860941
	YER111C	9.9	10.3	9.28	9.48	-0.577787	-0.848397
	YER113C	9.9	9.9	8.13	8.23	-1.72805	-1.62191
	YER114C	10.2	10.3	10.53	10.37	0.296696	0.058846
	YER115C	6.9	6.9	4.41	5.05	-2.46111	-1.85263
	YER116C	7	7.1	7.27	7.61	0.277518	0.486382
	YER118C	8.9	8.7	9.15	9	0.245753	0.278914
	YER119C	9.3	9.9	9.1	9.92	-0.198419	0.028171
	YER122C	10.8	10.5	11.6	11.19	0.7847	0.660016
	YER124C	11	11.4	10.85	11.18	-0.133315	-0.177843
	YER126C	9.1	8.8	10.07	9.86	0.986517	1.06487
	YER130C	8.6	8.9	8.03	8.69	-0.60366	-0.165834
	YER132C	10.1	10.3	7.9	8.18	-2.17075	-2.11163
	YER134C	7.9	7.7	8.71	8.36	0.774238	0.691366
	YER137C	4.6	5.6	5.14	6.01	0.50705	0.424084
	YER139C	6.9	6.7	7.53	7.35	0.625146	0.632547
	YER142C	6.9	7.7	7.48	7.81	0.545227	0.110687
	YER144C	9	9.4	7.83	8.17	-1.19659	-1.21489
	YER145C	10.7	11.5	10.61	11.59	-0.102498	0.074044
	YER147C	7.9	7.9	7	7.49	-0.897897	-0.416854
	YER149C	8.1	8.2	8.12	8.28	0.046655	0.069695
	YER151C	10.5	10.7	10.85	10.9	0.315396	0.151556
	YER152C	10.1	10.4	8.92	9.5	-1.16005	-0.916466
	YER155C	12.6	12.5	10.95	10.93	-1.62774	-1.60503
	YER156C	10	9.5	10.75	10.16	0.749165	0.694504
	YER158C	7.7	8	8.57	8.84	0.877664	0.797971
	YER159C	7.9	7.9	8.98	9.1	1.04616	1.18744
	YER161C	7.5	7.4	8.17	8.13	0.668078	0.694352
	YER162C	7.6	7.8	7.5	7.58	-0.098813	-0.191491
	YER163C	8.5	8.9	8.37	8.91	-0.114842	0.008366
	YER168C	9.2	9.2	9.2	9.39	0.025832	0.210757
	YER172C	11.2	11.3	9.77	9.8	-1.43145	-1.48894
	YER174C	8.1	7.5	8.51	7.83	0.381072	0.35495
	YER175C	7.3	7.3	8.16	8.13	0.814387	0.837896
	YER180C	6.9	7.1	-5.61	0.78	-12.5109	-6.33177
	YER180C-A	4.9	5.2	5.78	5.77	0.872325	0.522699
	YER183C	7.8	8	8.26	8.69	0.496015	0.647846
	YER184C	7.3	7.7	4.28	3.42	-3.03432	-4.31251
	YER186C	7.9	7.7	-0.26	-1.22	-8.17608	-8.95945
	YEL072W	6.2	6.7	3.19	3.1	-3.00587	-3.55897
	YEL071W	12.7	12.1	13.12	12.5	0.401236	0.442153
	YEL070W	4.9	6.6	4.4	5.8	-0.499906	-0.756612
	YEL066W	8.2	8.8	9.16	9.83	0.920124	1.01694
	YEL065W	9.7	10.5	9.58	10.41	-0.101132	-0.042853
	YEL062W	8.2	8.7	7.28	8.26	-0.916364	-0.395921
	YEL058W	11.1	10.9	10.73	10.79	-0.345933	-0.083141
	YEL056W	8.8	9	8.6	9	-0.239477	-0.019652
	YEL052W	9.2	9	8.63	8.67	-0.541562	-0.342108
	YEL051W	11.2	10.9	11.43	11.29	0.218788	0.406073
	YEL049W	4.1	4.5	2.84	4.49	-1.26036	0.013402
	YEL044W	8.1	8.5	8.91	9.5	0.834896	1.01296
	YEL043W	10.2	10.3	9.01	9.2	-1.16941	-1.08669
	YEL042W	11	10.5	11.24	11.05	0.273674	0.572309
	YEL041W	6.8	7.9	6	6.93	-0.78883	-0.927962
	YEL040W	11.7	11.1	11.71	11.4	0.047256	0.251425
	YEL038W	9	9.1	9.38	9.79	0.409586	0.686135
	YEL034W	13.9	13.4	15.04	14.64	1.08944	1.2918
	YEL033W	10.2	9.8	1.15	2.24	-9.06362	-7.54259
	YEL032W	10.6	10.2	10.05	9.48	-0.542766	-0.691575
	YEL031W	12.8	12.6	12.23	12.34	-0.564935	-0.287738
	YEL030W	6.6	6.9	3.06	4.62	-3.51522	-2.31604
	YEL028W	4.1	5.5	0.47	-0.22	-3.63511	-5.68404
	YEL027W	12.6	12	13.67	13.45	1.06616	1.4603
	YEL026W	10.5	10.2	12.09	11.71	1.55858	1.51872
	YEL024W	9.1	8.8	10.31	10.5	1.20882	1.70966
	YEL022W	11.1	11.1	9.92	10.26	-1.1954	-0.823391
	YEL021W	13.5	12.6	14.13	13.23	0.624927	0.618649
	YEL020W-A	7.5	7.7	9.08	9.14	1.59337	1.38943
	YEL018W	7.3	7	7.41	7.2	0.065485	0.16391
	YEL017W	8.6	9	9.78	9.91	1.15339	0.935463
	YEL015W	9.7	9.3	9.89	9.45	0.217115	0.153808
	YEL013W	11.2	10.9	10.76	11.07	-0.407874	0.185601
	YEL012W	7.5	8.3	8.26	8.96	0.787333	0.647333
	YEL011W	9.6	9.9	9.68	9.83	0.102153	-0.076384
	YEL007W	10.4	10.4	10.21	10.15	-0.236656	-0.298333
	YEL006W	8	8.2	7.36	7.72	-0.644332	-0.534343
	YEL004W	7.4	7.2	7.29	6.91	-0.071257	-0.297645
	YEL003W	8	7.4	8.63	7.64	0.620856	0.284836
	YER001W	10.6	10.6	10.31	10.48	-0.335215	-0.158834
	YER002W	7.7	7.6	9.26	8.98	1.5276	1.36184
	YER004W	9.9	9.7	10.26	10.29	0.380542	0.574088
	YER005W	8.8	9.1	7.43	7.91	-1.40932	-1.20251
	YER006W	10.4	10	11.06	10.73	0.683928	0.743061
	YER007W	6.9	7.3	6.17	5.89	-0.760424	-1.39546
	YER009W	11.3	10.9	12.95	12.65	1.61777	1.75073
	YER011W	6.9	7.4	8.97	9.68	2.08542	2.26293
	YER012W	9.9	9.4	10.44	10.4	0.542312	0.980104
	YER013W	9	9.4	8.31	8.78	-0.735972	-0.639111
	YER014W	9	9	8.43	8.76	-0.571909	-0.251134
	YER015W	7.1	7.5	5.45	6.46	-1.69663	-1.05074
	YER016W	8.8	8.7	8.73	8.38	-0.082508	-0.308275
	YER019W	9.4	9.6	8.92	9.3	-0.502655	-0.352252
	YER020W	9.3	9.4	9.47	9.57	0.210643	0.13525
	YER021W	11.3	11.4	11.25	11.29	-0.097105	-0.066765
	YER022W	8.9	9.1	8.95	9.14	0.049187	0.070698
	YER023W	11.8	11.3	12.28	12.04	0.525582	0.741513
	YER024W	7.8	8.4	5.7	6.3	-2.09999	-2.08652
	YER025W	11.8	11	12.74	12.13	0.983417	1.13118
	YER030W	7.6	7.4	9.2	9.28	1.59825	1.84431
	YER032W	9	9.1	9.32	9.4	0.33544	0.273979
	YER034W	6.9	7.4	8.42	8.46	1.51549	1.04584
	YER035W	8.4	8.7	9.75	10.25	1.39225	1.56223
	YER037W	6.6	8.4	6.44	8.57	-0.139507	0.159838
	YER040W	8.6	8.8	8.78	8.68	0.201753	-0.133697
	YER041W	7.7	8.1	5.03	5.72	-2.69012	-2.41615
	YER042W	7.3	7.9	8.73	9.33	1.41308	1.43902
	YER046W	5.4	5.8	5.54	5.97	0.132791	0.175159
	YER048W-A	7.9	8	8.92	9.01	0.987784	1.00343
	YER049W	10.7	10.6	10.56	10.49	-0.166624	-0.088891
	YER051W	7.6	8.1	6.35	6.92	-1.26036	-1.13771
	YER058W	5	5.6	5.95	6.27	0.908669	0.70085
	YER059W	8.1	8.1	8.72	8.69	0.605769	0.583389
	YER060W	8.4	7.7	7.5	6.85	-0.952963	-0.896261
	YER060W-A	8.3	8	8.43	8.36	0.141632	0.395563
	YER063W	8.9	8.2	10.28	9.74	1.42619	1.58372
	YER066W	6	6.4	4.28	3.63	-1.75454	-2.77867
	YER067W	8.1	9	9.43	10.59	1.30723	1.60333
	YER068W	9.4	9.5	10.9	10.76	1.45583	1.23238
	YER069W	10.5	11.3	10.4	11.49	-0.095511	0.168805
	YER070W	12.7	12.9	12.12	12.58	-0.583559	-0.343977
	YER072W	9.7	9.7	10.95	11.18	1.23775	1.51886
	YER073W	10.2	10.4	10.27	10.82	0.07388	0.424707
	YER074W	13.4	12.7	14.8	14.16	1.41473	1.47226
	YER074W-A	6.9	6.9	8.22	8.24	1.30035	1.31981
	YER079W	7.1	7.1	9.03	8.85	1.96454	1.77776
	YER080W	10.5	10.2	10.2	10.04	-0.321369	-0.196547
	YER081W	9	10	8.66	10.03	-0.335527	0.025962
	YER086W	11.5	11	11.48	11.25	-0.068057	0.23811
	YER087W	8.5	8.3	7.81	7.9	-0.683689	-0.411597
	YER090W	10.9	10.9	11.89	11.8	0.99108	0.949768
	YER092W	7.6	7.7	8.56	8.74	0.952787	1.06082
	YER095W	9.1	9.4	9.53	10.07	0.401352	0.640374
	YER096W	5.1	6.4	5	6.2	-0.066937	-0.160865
	YER098W	8	8.9	6.67	7.05	-1.36479	-1.8078
	YER100W	8.4	8.8	10.5	10.63	2.09065	1.80659
	YER102W	14.8	14.1	15.63	14.99	0.831169	0.939605
	YER103W	9.8	10.6	10.29	11.85	0.540692	1.22693
	YER104W	6.2	6.5	6.9	7.2	0.729687	0.675389
	YER112W	7.7	7.4	9.4	8.73	1.64709	1.29749
	YER117W	13.6	13	14.51	14.04	0.865954	1.04452
	YER120W	10.9	10.8	12.63	12.72	1.76588	1.95832
	YER121W	4.5	5.3	4.79	5.87	0.312138	0.536918
	YER123W	8.7	8.8	8.6	8.41	-0.066692	-0.375198
	YER125W	11.8	11.5	11.96	11.72	0.153749	0.261707
	YER127W	8	8.4	8.96	9.27	0.949404	0.881087
	YER128W	6.1	5.9	7.38	7.02	1.28502	1.17199
	YER129W	9.8	9.8	8.04	8.12	-1.76501	-1.6355
	YER131W	11.8	11.1	13.38	12.72	1.59966	1.59164
	YER133W	11	10.4	11.59	11.24	0.549315	0.887222
	YER136W	10.8	10.7	11.25	11.15	0.407856	0.470783
	YER138W-A	7.7	7.8	1.74	2.78	-5.92465	-5.00409
	YER140W	7.8	7.8	6.4	6.59	-1.38805	-1.19436
	YER141W	10.2	10.1	10.27	10.41	0.028259	0.270429
	YER143W	8.2	8.7	9.5	10.06	1.27889	1.3281
	YER146W	8.5	8.5	9.8	9.77	1.3077	1.31087
	YER148W	9.8	9.5	10.15	10.14	0.305878	0.631303
	YER150W	7.6	9.3	9.55	11.61	1.91337	2.31551
	YER154W	9.6	9.6	9.52	9.45	-0.078976	-0.13819
	YER157W	9.5	9.6	8.87	9.15	-0.634585	-0.477472
	YER164W	10.9	10.6	10.44	9.91	-0.50978	-0.715483
	YER165W	13.6	12.8	14.83	14.29	1.19581	1.49269
	YER166W	11.4	11.4	10.25	10.07	-1.18599	-1.2837
	YER167W	9.3	9.4	9.34	9.24	0.051979	-0.123873
	YER169W	8.7	9.1	8.46	8.8	-0.188634	-0.310921
	YER170W	6.7	6.6	8.05	7.62	1.34477	1.05846
	YER171W	9	9.1	8.31	8.52	-0.720599	-0.621812
	YER173W	7.9	8.1	6.15	6.47	-1.74887	-1.59176
	YER176W	9.5	9.4	8.97	8.89	-0.501395	-0.507241
	YER177W	13	13	14.32	14.24	1.27727	1.22066
	YER178W	13.1	12.7	13.3	13.06	0.203302	0.398391
	YER179W	4.7	5.5	4.54	5.14	-0.165018	-0.330155
	YER182W	7.1	7.1	7.96	7.61	0.815257	0.488191
	YER188W	5.5	5.2	4.4	4.78	-1.14437	-0.418337
	YFL057C	6.2	6.3	0.15	2.37	-6.0052	-3.90704
	YFL054C	7.6	8	6.46	7.21	-1.13339	-0.767529
	YFL050C	7.5	7.8	2.54	2.87	-4.92794	-4.96688
	YFL048C	10.3	10.4	10.54	10.84	0.214277	0.473036
	YFL045C	12.3	11.6	13.3	12.53	1.00035	0.979458
	YFL044C	8.2	8.6	8.92	9.29	0.685578	0.731277
	YFL042C	8.6	8.9	8.9	9.26	0.313585	0.323902
	YFL039C	14.8	14.3	15.66	15.32	0.842342	1.03029
	YFL038C	10.9	10.8	11.89	11.71	0.989078	0.945908
	YFL034C-B	7.7	8	9.02	9.31	1.33817	1.31739
	YFL034C-A	8.7	8.5	10.26	9.69	1.60164	1.22792
	YFL033C	10.4	10.8	9.31	9.94	-1.07882	-0.847414
	YFL029C	7.5	7.6	7.31	7.54	-0.230447	-0.078144
	YFL028C	8.5	8.5	8.69	8.73	0.19624	0.228643
	YFL027C	8.1	8	6.76	7.02	-1.30543	-1.02383
	YFL025C	9.2	9.6	8.01	8.4	-1.21551	-1.16849
	YFL024C	8.9	9.2	8.15	8.03	-0.758826	-1.12626
	YFL022C	11.8	11.3	12.96	12.44	1.21361	1.12474
	YFL020C	4	4.5	2.14	4.39	-1.83583	-0.060398
	YFL018C	11.6	11.4	12.33	12.37	0.774889	0.997119
	YFL017C	8.2	8.1	8.92	8.73	0.67179	0.665941
	YFL016C	10	10.4	10.48	10.83	0.487596	0.417662
	YFL013C	8.8	8.9	9.18	9.16	0.411949	0.304074
	YFL010C	10.5	10.1	12.83	12.75	2.37709	2.63991
	YFL003C	5.9	6.7	3.4	3.9	-2.50906	-2.76985
	YFL002C	8.7	8.8	8.79	8.84	0.053809	0.055593
	YFR003C	7.6	7.8	9.21	9.29	1.64813	1.4447
	YFR005C	8.5	8.4	7.82	7.65	-0.629224	-0.796307
	YFR011C	7.9	8.3	9.08	9.16	1.21975	0.828556
	YFR014C	8.8	8.8	8.96	9.11	0.123874	0.313029
	YFR015C	10.2	9.4	9.83	9.01	-0.345544	-0.351901
	YFR016C	10.3	10.1	10.69	10.61	0.354371	0.489106
	YFR017C	7.4	8.4	8.65	9.65	1.25753	1.29131
	YFR018C	9.3	8.7	8.16	8.21	-1.09923	-0.53833
	YFR024C-A	10.6	10.6	10.92	11	0.357511	0.421932
	YFR025C	8.9	9	8.63	8.67	-0.2638	-0.299727
	YFR026C	4.5	5.2	-0.27	0.78	-4.73857	-4.38834
	YFR028C	9.5	9.4	9.22	9.26	-0.232318	-0.125336
	YFR031C	9.3	9.4	7.5	7.69	-1.79351	-1.70539
	YFR031C-A	14.6	13.9	15.63	15.1	1.0454	1.23508
	YFR032C-A	12.5	11.8	13.81	12.92	1.32027	1.13322
	YFR033C	8.4	8.3	8.97	8.87	0.592373	0.605701
	YFR034C	8.6	8.4	9.51	9.27	0.880391	0.900707
	YFR037C	10.1	9.9	10.92	10.73	0.785629	0.789052
	YFR039C	8.9	8.9	8.4	8.45	-0.49236	-0.415186
	YFR041C	8	7.4	8.75	8.17	0.734052	0.803416
	YFR043C	6.6	6.8	6.92	7.29	0.29424	0.483725
	YFR044C	11.9	12	12.57	13.05	0.684774	1.09443
	YFR046C	6.5	6.7	6.56	6.03	0.082001	-0.678968
	YFR047C	9.7	9.7	10.18	10.27	0.474842	0.585969
	YFR050C	10.3	10.3	10.94	11.05	0.602088	0.766613
	YFR051C	11.2	10.9	11.48	11.33	0.277044	0.388977
	YFR053C	12.8	13.3	13.41	14.11	0.625227	0.827788
	YFR054C	3.8	3.9	-0.27	-1.22	-4.05337	-5.11538
	YFL055W	6	6	4.49	4.69	-1.49579	-1.30278
	YFL052W	4.6	5.8	3.9	5.14	-0.728288	-0.687573
	YFL049W	8.4	8.7	8.52	8.65	0.143203	-0.047899
	YFL047W	9.7	9.7	8.3	8.69	-1.39243	-0.967905
	YFL046W	7.4	7.5	7.78	7.81	0.37796	0.265346
	YFL041W	9.8	9.7	9.81	9.92	-0.008987	0.254049
	YFL037W	12.4	11.8	12.42	11.96	0.043865	0.160554
	YFL036W	10.7	11.1	9.89	10.43	-0.844332	-0.643536
	YFL034W	9.4	9.2	8.64	8.86	-0.725621	-0.385693
	YFL031W	12.5	12.3	7.68	8.04	-4.82203	-4.26793
	YFL030W	6	6.3	4.85	5.3	-1.16077	-0.950778
	YFL026W	12	10.9	11.87	10.89	-0.085191	0.025598
	YFL023W	8.5	8.8	8.82	8.95	0.325014	0.175897
	YFL021W	8.9	9.2	9.43	9.62	0.493513	0.411269
	YFL017W-A	6	6.5	8.44	9.06	2.40956	2.57599
	YFL014W	10	12.9	11.74	15.02	1.76952	2.08059
	YFL011W	3.3	4.9	2.79	4.72	-0.49248	-0.155105
	YFL009W	10.1	10.5	9.82	9.95	-0.281634	-0.518
	YFL008W	10.1	9.9	9.51	9.24	-0.579232	-0.650208
	YFL007W	11.9	11.9	10.37	10.57	-1.5628	-1.31166
	YFL005W	10.1	9.8	11.02	10.81	0.920484	1.00906
	YFL004W	11.3	10.8	11.04	10.57	-0.272502	-0.269439
	YFL001W	7.7	7.9	7.74	7.7	0.005132	-0.154859
	YFR001W	7.6	7	8.51	8.18	0.898203	1.1754
	YFR002W	10.4	10.5	10.04	10.19	-0.309865	-0.305336
	YFR004W	10.1	10.4	10.72	10.99	0.586953	0.566527
	YFR006W	10.1	10.2	10.17	10.28	0.051392	0.066644
	YFR007W	7.4	7.8	7.41	8	0.02419	0.2379
	YFR008W	6.1	6.1	7.32	7.4	1.20387	1.25505
	YFR009W	11.4	11.3	11.28	11.34	-0.137715	0.069188
	YFR010W	10.5	10.4	11.22	11.29	0.720929	0.883754
	YFR013W	9.3	9.3	8.97	9.22	-0.3728	-0.048387
	YFR019W	11	11.4	9.65	10.06	-1.38247	-1.31811
	YFR020W	5.7	5.4	4.34	3.53	-1.316	-1.89912
	YFR021W	8.5	9.2	8.52	9.11	-0.023219	-0.054788
	YFR022W	8.1	8.7	6.32	7.27	-1.78599	-1.42332
	YFR023W	5	6.7	4.78	6.4	-0.242725	-0.282397
	YFR027W	5.9	6.6	6.74	6.95	0.802597	0.366433
	YFR029W	8.3	8.8	7.89	8.44	-0.396739	-0.329944
	YFR030W	9.1	9.6	7.45	8.33	-1.6622	-1.2227
	YFR034W-A	5.4	5.1	5.21	4.85	-0.169391	-0.231391
	YFR038W	9.6	9.5	8.6	8.48	-1.01503	-1.06549
	YFR040W	10.3	10.1	9.23	9.03	-1.03849	-1.08593
	YFR042W	7.7	8.3	7.96	8.66	0.255226	0.336489
	YFR045W	6.8	6.7	7.61	7.32	0.770953	0.60948
	YFR048W	8.3	8.6	8.14	8.56	-0.122095	-0.056011
	YFR049W	7.8	7.3	9.45	9.27	1.64914	1.94735
	YFR052W	9.8	9.9	10.92	10.92	1.1263	1.03749
	YFR055W	8.7	7.6	9.05	7.27	0.332705	-0.323729
	YGL257C	9.2	8.7	7.39	6.91	-1.82947	-1.75634
	YGL252C	9.8	9.5	9.05	8.76	-0.777764	-0.699961
	YGL251C	7.6	7	4.97	3.63	-2.65575	-3.32046
	YGL246C	8.3	8.5	8.06	8.31	-0.262811	-0.180778
	YGL242C	8.5	8.6	9.81	10.03	1.32357	1.46753
	YGL237C	7.2	7.2	7.98	8.63	0.791332	1.46733
	YGL236C	8.5	8.2	7.2	6.8	-1.29617	-1.35633
	YGL231C	9	9	10.28	10.16	1.26434	1.18729
	YGL229C	8.6	8.3	6.4	6.3	-2.20924	-2.0232
	YGL226C-A	7.5	7.3	9.92	9.52	2.46681	2.22886
	YGL224C	7.7	7.9	7.82	8.2	0.077226	0.295957
	YGL223C	8.5	8.6	8.6	8.71	0.073409	0.135282
	YGL222C	7	7.4	9.26	9.5	2.2946	2.13917
	YGL221C	9.5	10	10.39	10.71	0.852999	0.759308
	YGL219C	8.5	8.7	8.55	8.81	-0.004458	0.083586
	YGL213C	9	8.6	9.32	9.18	0.352173	0.601382
	YGL206C	13.8	13.5	14.02	13.63	0.1922	0.131649
	YGL204C	6.4	7.5	6.7	7.73	0.275382	0.214516
	YGL203C	10	9.9	9.69	9.61	-0.298342	-0.313237
	YGL201C	10.2	10.3	9.76	9.81	-0.475961	-0.51183
	YGL200C	10.4	10.5	11.34	11.29	0.927194	0.786233
	YGL194C-A	6.7	6.7	6.31	6.41	-0.350475	-0.313974
	YGL194C	8.2	8.4	8.17	8.42	-0.056042	-0.021509
	YGL193C	4.6	5.6	-0.26	-4.99	-4.87152	-10.5409
	YGL190C	9.6	9.9	8.6	8.8	-1.02988	-1.07208
	YGL189C	13.2	12.7	14.51	13.84	1.34745	1.18419
	YGL187C	9	8.3	10.53	10.13	1.51293	1.83855
	YGL186C	9.6	9.4	10.05	10.08	0.489457	0.63634
	YGL185C	7.7	8.1	7.98	8.33	0.274499	0.19201
	YGL184C	4.6	4.9	5.54	5.41	0.953401	0.552598
	YGL179C	7.3	8.2	6.47	7.75	-0.775985	-0.406994
	YGL176C	7.9	8.2	5.08	5.52	-2.78603	-2.70695
	YGL175C	6.6	6.8	5.76	5.87	-0.839203	-0.949895
	YGL173C	13	12.6	12.64	11.93	-0.368209	-0.666384
	YGL167C	11.5	11.4	10.58	10.52	-0.942031	-0.924072
	YGL164C	7.3	7.3	7.62	7.52	0.348775	0.259621
	YGL163C	9	9.5	8.18	8.86	-0.79543	-0.594486
	YGL161C	9.2	9.3	9.6	9.91	0.434417	0.642944
	YGL154C	6.8	7.1	5.76	6.05	-1.02123	-1.0539
	YGL150C	11.1	11.1	9.29	9.68	-1.85141	-1.42096
	YGL147C	14	13.1	15.07	14.37	1.1015	1.23431
	YGL146C	6	6.8	3.5	5.45	-2.52654	-1.40101
	YGL144C	7.8	8	5.82	6.22	-1.93901	-1.76669
	YGL143C	7.9	7.7	7.34	7.21	-0.563051	-0.527524
	YGL142C	9	8.9	8.27	8.2	-0.691673	-0.730554
	YGL140C	10.7	10.6	9.27	9.33	-1.46539	-1.22623
	YGL136C	6.8	7.1	5.31	5.49	-1.44999	-1.60292
	YGL131C	9.4	9.7	6.66	7.21	-2.70474	-2.45809
	YGL129C	8.9	9	9.23	9.08	0.334155	0.071859
	YGL128C	6.5	6.9	7.23	6.91	0.769026	0.020502
	YGL127C	6.6	6.7	8.31	8.37	1.75864	1.69369
	YGL124C	8.2	8.2	7.58	7.86	-0.642685	-0.310915
	YGL122C	9.6	9.4	11.82	11.29	2.18444	1.85803
	YGL121C	6.1	7.8	7.08	8.69	1.01408	0.927027
	YGL120C	10.8	10.8	11.11	11.11	0.263363	0.284872
	YGL112C	9.4	9.4	9.36	9.6	-0.025675	0.181074
	YGL110C	8.5	8.3	8.3	8.2	-0.228478	-0.110873
	YGL108C	6.4	6.4	6.93	7	0.560714	0.596641
	YGL107C	9.1	9.1	8.67	8.66	-0.460783	-0.427754
	YGL104C	8.2	8	7.77	7.63	-0.431792	-0.366898
	YGL095C	9	8.9	8.45	8.19	-0.527816	-0.725433
	YGL094C	10.2	10.4	7.78	7.84	-2.43028	-2.56826
	YGL091C	7.8	8.2	8.72	9.2	0.879753	1.03452
	YGL087C	8.2	8.8	10.17	10.7	2.00915	1.89387
	YGL084C	9.7	9.6	9.88	9.8	0.20782	0.155841
	YGL078C	9.9	9.7	10.82	10.64	0.877027	0.930063
	YGL077C	11.3	11.1	11.26	11.14	-0.074592	0.084272
	YGL076C	14.6	14.1	15.88	15.53	1.3004	1.4692
	YGL075C	6.8	6.9	6.69	6.75	-0.160981	-0.193284
	YGL072C	4.8	5.9	2.79	3.11	-2.01531	-2.83172
	YGL070C	7.9	7.8	9.26	9.03	1.38628	1.18224
	YGL065C	8.9	8.8	9.03	9.14	0.149662	0.311374
	YGL064C	7.4	7.8	7.78	8.12	0.375378	0.350239
	YGL061C	7.1	6.8	7.92	7.64	0.826673	0.861231
	YGL057C	7.1	7.3	7.61	7.68	0.553091	0.414988
	YGL056C	9.2	9.6	9.55	10.11	0.348091	0.506561
	YGL054C	9.7	9.6	10.72	10.81	1.03063	1.254
	YGL049C	10.4	10.1	11.22	10.83	0.851601	0.776099
	YGL048C	10.7	10.3	11.18	10.9	0.512572	0.562331
	YGL044C	7.6	7.4	8.88	9	1.29847	1.59286
	YGL040C	10.3	10.2	10.96	11.07	0.659118	0.893802
	YGL038C	10	9.4	9.75	9.27	-0.233651	-0.098286
	YGL037C	11.2	11.9	12.85	13.59	1.59816	1.70042
	YGL035C	9	9.3	9.75	10.18	0.798386	0.845247
	YGL032C	7.3	6.8	9.56	8.24	2.21749	1.42506
	YGL031C	13	12.2	14.25	13.57	1.29744	1.33589
	YGL028C	10.5	10.9	11.65	12.21	1.15144	1.29809
	YGL027C	10.9	10.5	10.39	9.95	-0.536383	-0.524048
	YGL026C	12.8	12.6	13.64	13.65	0.845015	1.07228
	YGL025C	7.8	7.7	8.95	8.81	1.14691	1.15186
	YGL023C	9.8	9.4	9.51	9.28	-0.27611	-0.145721
	YGL020C	8.5	8.2	9.29	9.07	0.815294	0.885335
	YGL018C	6.7	6.9	7.92	8.17	1.19036	1.26348
	YGL013C	10.1	10.4	8.98	9.42	-1.10082	-1.00267
	YGL011C	10.4	10.5	10.92	11.12	0.529662	0.64519
	YGL009C	12.9	11.6	13.39	12.09	0.502102	0.498474
	YGL008C	16.8	16.7	16.87	17.21	0.048282	0.552122
	YGL005C	7.6	7.3	7.35	6.79	-0.283846	-0.477235
	YGL004C	7.7	7.5	7.12	7.13	-0.596329	-0.379112
	YGL003C	8.1	7.9	7.94	8.08	-0.137726	0.144423
	YGL001C	10.2	10	10.34	10.47	0.170085	0.437843
	YGR001C	9.4	9.4	9.87	9.85	0.452346	0.488166
	YGR002C	8.3	8.3	8.67	8.59	0.383409	0.29435
	YGR005C	8.6	8.2	9.33	9.1	0.724948	0.872714
	YGR008C	8.2	8.6	10.44	11.05	2.19711	2.41677
	YGR009C	9.6	9.3	10.23	9.97	0.628262	0.673494
	YGR015C	6.6	6.8	6.6	6.54	-0.018287	-0.249851
	YGR020C	9.8	9.5	11.24	10.87	1.47579	1.37626
	YGR024C	8.5	8.6	7.86	7.75	-0.66248	-0.822092
	YGR027C	13.3	12.8	14.15	13.55	0.873542	0.78129
	YGR030C	6.3	6.5	7.09	7.17	0.791563	0.680177
	YGR033C	8.5	8.2	8.69	8.66	0.144183	0.487333
	YGR035C	3.9	4.3	4.93	5.52	1.00658	1.23331
	YGR036C	7.1	7.1	7.52	7.72	0.376621	0.596921
	YGR037C	10.3	10.1	12.14	12.04	1.82035	1.92484
	YGR043C	6.8	9.6	7.26	10.49	0.449644	0.908487
	YGR044C	9.4	9.6	9.55	9.54	0.107157	-0.013813
	YGR045C	5.3	5.4	2.79	2.47	-2.51888	-2.93174
	YGR047C	9.3	9.3	8.53	8.02	-0.749252	-1.25211
	YGR050C	5.4	5.8	5	4.66	-0.430169	-1.09635
	YGR053C	5.2	5.5	4.61	5.49	-0.576685	-0.050495
	YGR057C	6.9	7.4	5.54	6.01	-1.34277	-1.39492
	YGR061C	13.6	12.4	12.85	12.11	-0.699043	-0.274877
	YGR062C	7	7.1	6.15	6.2	-0.839344	-0.886709
	YGR063C	8.2	8.3	8.91	9.32	0.753791	1.0026
	YGR065C	8.9	9.1	8.15	8.28	-0.721372	-0.780757
	YGR067C	5.7	6.1	4.78	5.27	-0.899113	-0.870241
	YGR068C	8.5	8.5	7.57	7.52	-0.927139	-0.94402
	YGR071C	8.7	9	7.73	7.79	-0.957213	-1.23481
	YGR073C	4.9	5	-1.85	-4.99	-6.76211	-9.98388
	YGR075C	6	6	6.62	6.41	0.573236	0.426217
	YGR076C	6.2	6	8.52	8.39	2.27212	2.42687
	YGR077C	8.8	9	7.74	8.28	-1.0544	-0.733311
	YGR078C	8.3	8.6	9.89	9.93	1.55786	1.37778
	YGR081C	7.2	7.2	8.47	8.34	1.25591	1.08929
	YGR083C	10.2	10.1	10.54	10.19	0.321125	0.083289
	YGR084C	8.3	8.4	9.11	9.23	0.816819	0.821666
	YGR085C	13.7	13.3	15	14.49	1.28227	1.19465
	YGR086C	12.7	12.6	13.56	13.52	0.840651	0.951417
	YGR087C	4.7	7	6.62	8.06	1.93697	1.07984
	YGR095C	7.5	7.7	8.66	9.03	1.2117	1.33173
	YGR098C	10.2	10.3	7.69	7.83	-2.54238	-2.519
	YGR102C	7.6	8	7.87	7.91	0.25071	-0.110804
	YGR104C	7.4	7.8	8.04	8.49	0.63851	0.663869
	YGR106C	11	10.7	11.35	11.37	0.296166	0.675312
	YGR109C	7.4	7.3	8.33	8.16	0.883964	0.900098
	YGR117C	9	8.9	8.66	8.43	-0.362076	-0.453421
	YGR119C	9.9	9.8	10.65	10.39	0.744013	0.616439
	YGR120C	7.4	7.1	7.45	7.11	0.062073	0.003041
	YGR121C	6.6	7.6	5.68	6.6	-0.930354	-0.975842
	YGR122C-A	5	4.7	3.58	3.99	-1.38637	-0.73893
	YGR123C	10.2	9.7	10.58	10.04	0.367736	0.370207
	YGR128C	9.8	9.8	9.79	9.65	0.020638	-0.163189
	YGR130C	10.6	10.5	11.84	11.72	1.19104	1.25327
	YGR132C	10.3	10	10.76	10.65	0.509258	0.606037
	YGR138C	10.6	11.3	11.09	11.98	0.522111	0.726863
	YGR146C	7.9	8.5	8.66	9.08	0.766508	0.627866
	YGR147C	8.4	8.4	8.14	8.47	-0.268036	0.03385
	YGR148C	12.6	11.9	13.96	13.39	1.38138	1.50439
	YGR150C	8.9	9	7.04	7.11	-1.90393	-1.88279
	YGR154C	6.4	6.9	0.73	-0.22	-5.63544	-7.14214
	YGR158C	7.9	7.9	8.99	9.24	1.09271	1.36741
	YGR159C	11.3	10.7	12.4	11.64	1.0748	0.922789
	YGR161C	7.1	8.2	9.35	10.4	2.29341	2.22209
	YGR168C	7.2	7.6	5.39	5.69	-1.80386	-1.88929
	YGR169C	7.6	7.5	6.49	6.48	-1.1336	-1.06055
	YGR169C-A	6.5	6.3	8.15	8.14	1.67452	1.87138
	YGR171C	8	8	6.99	7.12	-1.00928	-0.876933
	YGR172C	9.2	9.1	10.27	10.32	1.0272	1.17053
	YGR174C	7	6.9	7.68	7.78	0.703764	0.924193
	YGR175C	12.4	12.2	13.11	13.09	0.721786	0.889347
	YGR177C	8.5	9.2	8.27	8.9	-0.235686	-0.320268
	YGR178C	11.4	11.3	11.98	11.93	0.573737	0.646415
	YGR179C	7.4	7.6	7.43	7.61	0.020285	0.023493
	YGR180C	12.3	12.5	13.12	13.73	0.828715	1.18041
	YGR182C	7.1	7.7	-0.85	-4.99	-7.98481	-12.7243
	YGR183C	6.9	6.9	8.59	9.18	1.68918	2.29495
	YGR184C	11.8	12	9.96	10.18	-1.81488	-1.85109
	YGR185C	11.7	11.1	12.51	12.42	0.859635	1.29388
	YGR187C	8.8	8.8	9.64	9.66	0.807698	0.83269
	YGR188C	7.8	7.9	6.17	6.34	-1.61755	-1.54486
	YGR189C	11.7	12.2	12.75	13.53	1.08889	1.3415
	YGR192C	17.9	17.6	19.05	18.8	1.16089	1.2238
	YGR193C	9.3	9	10.75	10.48	1.47125	1.44576
	YGR194C	9.1	9	8.44	8.02	-0.678253	-0.943729
	YGR196C	9.2	9.1	9.73	9.88	0.544354	0.776674
	YGR197C	7.9	7.7	7.54	7.61	-0.354347	-0.069789
	YGR200C	10.4	10.3	9.77	9.79	-0.620707	-0.518683
	YGR201C	6.7	7.3	5.78	7.59	-0.928206	0.329274
	YGR202C	8.8	8.7	9.48	9.44	0.694556	0.709294
	YGR207C	9.3	9.1	10.56	10.45	1.29105	1.30821
	YGR209C	11.2	10.9	12.67	12.72	1.44161	1.79044
	YGR210C	9.7	9.6	9.73	9.69	0.029954	0.074263
	YGR213C	2.7	4.6	1.74	3.64	-0.938663	-0.994282
	YGR216C	8.9	8.8	7.75	7.7	-1.14867	-1.1343
	YGR220C	8.7	8.9	8.77	9.07	0.069417	0.19273
	YGR221C	8	7.2	6.05	5.41	-1.91921	-1.77789
	YGR223C	7.8	8.1	6.97	7.14	-0.837313	-0.946757
	YGR229C	10.4	9.9	10.33	9.99	-0.068389	0.082717
	YGR231C	10.2	10.4	10.61	10.91	0.367541	0.555344
	YGR233C	9.1	9.2	7.85	8.21	-1.24918	-1.03336
	YGR235C	8.7	8.8	9.66	9.9	0.991173	1.06552
	YGR237C	8.8	8.7	8.97	9.08	0.173525	0.329928
	YGR238C	9.1	9.1	7.65	7.65	-1.47172	-1.42449
	YGR239C	6.1	6.8	6.84	7.7	0.738184	0.902509
	YGR240C	14.4	13.8	14.65	14.3	0.217237	0.530822
	YGR241C	9.3	9.3	9.25	9.36	-0.089839	0.065177
	YGR244C	10.5	10.8	10.95	11.34	0.436797	0.520219
	YGR245C	10.1	9.5	9.77	9.46	-0.302226	-0.06978
	YGR246C	8.8	8.3	9.14	8.83	0.365786	0.477477
	YGR250C	10	10.4	10.01	10.54	-0.004271	0.109565
	YGR253C	10.5	10.5	10.6	10.81	0.105925	0.265917
	YGR255C	9.6	9.8	8.81	9.03	-0.838247	-0.731538
	YGR257C	8.9	8.9	7	7.53	-1.91368	-1.33445
	YGR258C	9.1	9.4	7.65	8.51	-1.47632	-0.880051
	YGR261C	10.7	10.6	9.85	10	-0.859224	-0.646558
	YGR262C	8.2	8.3	8.53	8.75	0.308446	0.420047
	YGR263C	7.3	7.3	7.46	7.48	0.197899	0.152437
	YGR264C	12.5	12.1	12.31	12.19	-0.143028	0.108412
	YGR267C	9.7	9.2	9.97	9.59	0.310281	0.363143
	YGR268C	6.9	7.7	8.58	9.13	1.6753	1.40276
	YGR271C-A	7	6.6	7.99	7.9	1.0076	1.34664
	YGR274C	9.3	9.4	8.52	8.42	-0.799308	-0.995934
	YGR276C	9	9	8.73	8.95	-0.317979	-0.076252
	YGR277C	8.2	8.5	8.57	8.88	0.365213	0.411821
	YGR279C	13.4	12.8	14.57	14.18	1.12755	1.35858
	YGR280C	7.9	7.7	8.88	8.67	0.943648	1.00324
	YGR282C	13.2	12.9	13.92	13.85	0.672328	0.961874
	YGR283C	7.6	7.9	7.79	8.13	0.138319	0.236074
	YGR284C	10.4	10.6	11.19	11.4	0.756857	0.764885
	YGR285C	12.6	12.2	14.08	13.78	1.46339	1.59527
	YGR286C	8.9	8.7	9.39	9.3	0.537267	0.62277
	YGR287C	7.1	7.9	6.06	7.37	-1.06368	-0.556978
	YGR289C	6.6	7.1	0.73	1.36	-5.90329	-5.71318
	YGL263W	5.5	2.8	4.28	1.94	-1.24381	-0.886074
	YGL256W	8.2	8.4	6.95	6.84	-1.24809	-1.51518
	YGL255W	12.5	13.3	12.53	13.6	0.070817	0.265982
	YGL254W	6.9	6.8	7.68	7.54	0.749881	0.690764
	YGL253W	13.8	13.3	14.57	14.23	0.741621	0.907324
	YGL250W	6.6	6.9	6.76	7.15	0.159418	0.285022
	YGL248W	8.7	9.2	7.97	8.21	-0.72084	-1.02737
	YGL247W	6.6	7	5.94	5.99	-0.617455	-0.975759
	YGL245W	13.8	13.5	14.36	14.21	0.60356	0.732633
	YGL244W	9.7	9.3	10.55	10.24	0.848705	0.894478
	YGL243W	8	7.7	6.41	6.15	-1.57086	-1.59474
	YGL241W	9.5	9.4	8.94	8.91	-0.558403	-0.488115
	YGL240W	6	5.8	5.97	6.22	-0.014286	0.419367
	YGL238W	11.3	11.6	10.91	11.32	-0.440672	-0.279256
	YGL234W	13	11.8	13.53	12.78	0.573662	0.995594
	YGL233W	10	10	8.8	8.94	-1.23168	-1.03012
	YGL232W	9.1	8.7	9.5	8.8	0.444582	0.110701
	YGL228W	10.6	10.3	10.55	10.39	-0.079667	0.111547
	YGL227W	9.6	9.4	8.54	8.58	-1.09851	-0.860206
	YGL226W	5.9	6	7.08	7.59	1.22084	1.594
	YGL225W	11.6	11.2	12.16	11.7	0.525559	0.488443
	YGL220W	8.5	8.6	9.1	9.19	0.571362	0.554445
	YGL216W	9.4	9.4	8.22	8.45	-1.13556	-0.984342
	YGL215W	11	11.4	9.62	10.13	-1.3963	-1.24304
	YGL212W	7.5	7.7	8.23	8.49	0.730498	0.810369
	YGL211W	8.6	8.9	7.71	7.87	-0.936539	-1.08078
	YGL210W	7.9	7.7	8.49	7.95	0.591686	0.27179
	YGL209W	7.6	8.2	9.13	9.7	1.48705	1.53366
	YGL208W	7.7	7.7	8.84	8.94	1.17557	1.23249
	YGL207W	12.1	11.8	12.18	11.84	0.107657	0.053222
	YGL205W	3.1	5.3	2.32	5.02	-0.739916	-0.245882
	YGL202W	12.2	11.8	13.02	13.03	0.860711	1.23788
	YGL198W	9	8.7	9.79	9.6	0.830925	0.895261
	YGL197W	10.9	10.8	9.17	9.47	-1.73528	-1.30642
	YGL196W	9	8.6	8.64	8.61	-0.347421	-0.027663
	YGL195W	14.1	14.1	13.16	13.44	-0.941119	-0.653974
	YGL191W	9.4	9.4	11.01	11.09	1.62004	1.6797
	YGL181W	9	8.7	10.14	10.18	1.18032	1.45131
	YGL180W	8.5	9.1	7.53	8.23	-0.977732	-0.860555
	YGL178W	9.7	10.1	9.67	10.11	-0.037124	-0.040705
	YGL174W	6.7	6.4	7.32	6.48	0.650893	0.053112
	YGL172W	9.7	9.7	10.54	10.52	0.877678	0.781681
	YGL171W	9	8.7	9.43	9.42	0.397472	0.695647
	YGL169W	8	8.3	8.45	9.01	0.426765	0.752699
	YGL166W	7.4	8.1	8.2	8.78	0.753383	0.674807
	YGL162W	6.6	7.1	7.05	7.48	0.437383	0.429623
	YGL160W	9.1	8.9	8.63	8.59	-0.51496	-0.295387
	YGL159W	8.3	8	7.95	7.68	-0.335287	-0.275369
	YGL158W	3.8	4.7	0.47	3.25	-3.36957	-1.40634
	YGL157W	9.9	9.5	10.35	10.05	0.421687	0.552989
	YGL156W	9.3	9.4	8.54	8.91	-0.756805	-0.453881
	YGL155W	8.7	8.5	7.6	7.84	-1.0902	-0.668851
	YGL153W	8	7.3	8.68	8.37	0.698335	1.0528
	YGL151W	10.1	10.3	9.16	9.65	-0.902429	-0.699569
	YGL148W	11.5	11.1	12.47	12.26	0.994893	1.15093
	YGL145W	9	9.1	8.64	8.82	-0.307834	-0.290239
	YGL141W	9.3	9.6	8.41	8.85	-0.853606	-0.710689
	YGL139W	10	9.8	9.44	9.27	-0.563264	-0.564432
	YGL137W	12.6	12.3	12.31	12.06	-0.25624	-0.210501
	YGL135W	15.1	14.4	15.73	15.25	0.583761	0.801298
	YGL134W	7.4	7.6	6.14	6.28	-1.2596	-1.30655
	YGL133W	9.4	9.9	8.11	8.65	-1.29711	-1.26862
	YGL130W	8.6	8.4	9.13	9.19	0.49001	0.83794
	YGL125W	11	10.8	10.79	10.93	-0.242999	0.088476
	YGL123W	14.7	13.8	15.65	15.08	0.999453	1.31306
	YGL119W	8.5	8.7	8.35	8.69	-0.134136	-0.018648
	YGL117W	6.6	6.9	6.38	7.03	-0.248152	0.092901
	YGL116W	9	9	9.38	9.5	0.412272	0.465589
	YGL115W	9.8	9.8	9.87	9.84	0.044222	0.067235
	YGL114W	9.2	8.9	8.16	8.25	-1.01914	-0.681601
	YGL113W	7.9	8.4	5.66	6.34	-2.22904	-2.02907
	YGL111W	8.9	8.6	9.18	8.83	0.246887	0.247877
	YGL106W	9.5	9.5	11.36	11.23	1.88661	1.70551
	YGL105W	12.5	12.2	13.64	13.37	1.13742	1.17546
	YGL103W	14.3	13.8	15.23	14.69	0.89157	0.845341
	YGL101W	8.3	7.7	8.81	8.2	0.458645	0.515289
	YGL100W	9.7	9.5	9.47	9.17	-0.257359	-0.30001
	YGL099W	10.1	9.9	10.32	10.02	0.192886	0.098481
	YGL098W	7.1	7.2	7.44	7.17	0.291851	-0.060615
	YGL097W	10.2	10.1	10.37	10.25	0.198983	0.180494
	YGL096W	7.2	8	6.96	7.68	-0.188232	-0.315906
	YGL093W	9.1	9.5	8.86	9.12	-0.21486	-0.331046
	YGL092W	11.2	11.1	10.97	10.83	-0.272749	-0.317783
	YGL090W	7	7.3	4.56	5.06	-2.42726	-2.22465
	YGL088W	15	14.8	11.3	11.23	-3.72985	-3.53512
	YGL086W	9.5	8.8	8.63	8.17	-0.830947	-0.607555
	YGL085W	6.4	6.6	5.38	5.6	-1.03039	-0.976358
	YGL083W	8.7	8.9	7.96	8.32	-0.750487	-0.545909
	YGL082W	9.1	8.6	9.27	8.62	0.197163	0.000612
	YGL081W	5.7	6	6.22	6.64	0.508556	0.613549
	YGL080W	7.4	7.6	9.05	9.17	1.64565	1.59997
	YGL079W	7.5	7.7	7.6	7.68	0.068836	-0.063546
	YGL073W	9.3	9.7	9.19	9.56	-0.082871	-0.114388
	YGL071W	8.9	9.6	8.63	8.98	-0.295551	-0.630603
	YGL068W	9.4	9.4	10.57	10.56	1.20495	1.15728
	YGL067W	8.8	8.7	8.68	8.6	-0.106864	-0.120856
	YGL066W	8.6	8.8	9.32	9.53	0.748718	0.761374
	YGL063W	6.7	6.8	4.82	4.69	-1.87875	-2.07907
	YGL062W	12	12.6	11.2	12.1	-0.835442	-0.52793
	YGL060W	8.7	8.8	8.34	8.36	-0.33066	-0.409405
	YGL059W	7.4	7.8	6.49	6.66	-0.878732	-1.10543
	YGL058W	8.5	8.8	9.83	10.17	1.37114	1.41416
	YGL055W	11.8	11.6	12.15	12	0.339323	0.401524
	YGL050W	7.7	8	7.97	8.15	0.307989	0.149202
	YGL047W	7.1	7.4	7.61	7.9	0.496963	0.516181
	YGL045W	7.4	7.8	7.17	7.85	-0.235733	0.019805
	YGL043W	9.4	9.4	10.46	10.5	1.08287	1.05355
	YGL041W-A	7.3	7.1	7.92	7.63	0.671412	0.567037
	YGL039W	9	8.9	9.02	8.88	0.037709	-0.014734
	YGL036W	10.1	10.4	8.5	8.98	-1.62816	-1.42262
	YGL030W	13.3	12.6	14.43	13.78	1.16658	1.16332
	YGL029W	5.9	5.6	6.83	6.63	0.932189	1.06458
	YGL022W	12.2	11.9	11.77	11.63	-0.416514	-0.283686
	YGL021W	9.9	10.1	9.39	9.63	-0.507858	-0.501576
	YGL019W	9.5	9.3	9.61	9.44	0.131223	0.100458
	YGL017W	8.2	8.4	7.33	7.67	-0.884341	-0.705407
[truncated: 3,343 more rows]
